# Supplementary material
Source: MDPI journal article supplement (https://www.mdpi.com/2073-4344/12/12/1577)
Supplement: s1 [file s1]

Supporting Information

# **A Combined Computational-Experimental Study on the Substrate Binding and Reaction Mechanism of Salicylic Acid Decarboxylase**

Fuqiang Chen <sup>1,2,3,†</sup>, Yipei Zhao <sup>1,3,†</sup>, Chenghua Zhang <sup>2,3,4</sup>, Wei Wang <sup>3,5</sup>, Jian Gao <sup>3,5</sup>,  
Qian Li <sup>3,5</sup>, Huimin Qin <sup>1</sup>, Yujie Dai <sup>1</sup>, Weidong Liu <sup>3,5</sup>, Fufeng Liu <sup>1,\*</sup>, Hao Su <sup>3,5,\*</sup>  
and Xiang Sheng <sup>3,5,\*</sup>

<sup>1</sup> College of Biotechnology, Tianjin University of Science and Technology, Tianjin, 300457, China;

<sup>2</sup> Haihe Laboratory of Synthetic Biology, Tianjin 300308, China

<sup>3</sup> Tianjin Institute of Industrial Biotechnology, Chinese Academy of Sciences, Tianjin 300308, China

<sup>4</sup> School of Pharmacy, North Sichuan Medical College, Nanchong 637100, China

<sup>5</sup> National Center of Technology Innovation for Synthetic Biology and National Engineering Research Center of Industrial Enzymes, Tianjin 300308, China

\* Corresponding authors: shengx@tib.cas.cn; suhao@tib.cas.cn;

fufengliu@tust.edu.cn;

† These authors contributed equally to this work

## Table of Contents

|                                                                    |      |
|--------------------------------------------------------------------|------|
| 1. Optimized structures in the pathway of Mg-enzyme.....           | S3   |
| 2. Optimized structures in the pathway of Zn-enzyme.....           | S6   |
| 3. Optimized structures in the pathway of Mn-enzyme.....           | S9   |
| 4. Data collection and refinement statistics of TmSDC crystal..... | S12  |
| 5. Cartesian coordinates.....                                      | S133 |

## 1. Optimized structures in the pathway of Mg-enzyme

Optimized structures with full model for the transition states (**TS1-A<sub>Mg</sub>** and **TS2-A<sub>Mg</sub>**) and intermediates (**Int-A<sub>Mg</sub>** and **E:P-A<sub>Mg</sub>**) in the reaction pathway with Mode-A for the Mg-enzyme of SDC. The energies relative to **E:S-A<sub>Mg</sub>** are given in the parentheses (kcal/mol).

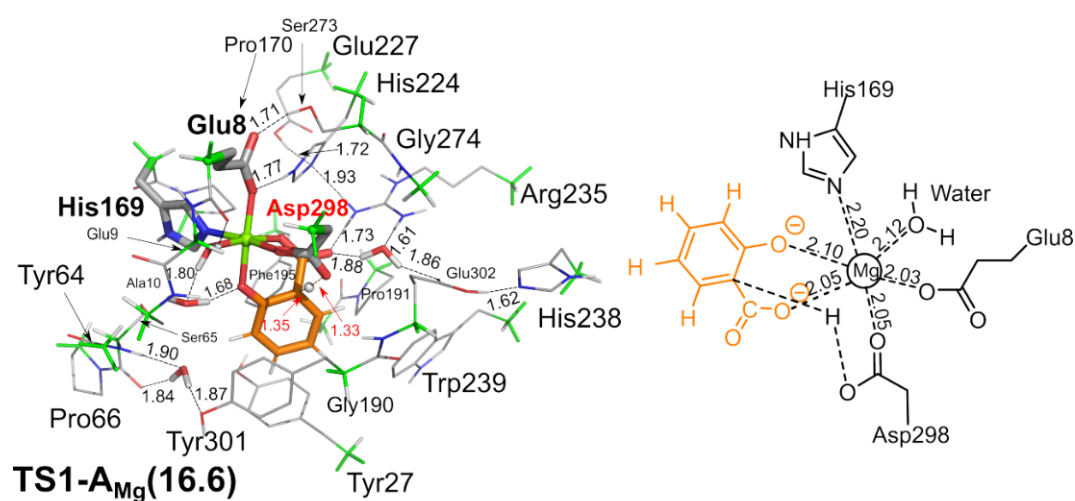

**Figure S1.** Optimized structure for the transition state of substrate protonation in the pathway with Mode-A for the Mg-enzyme.

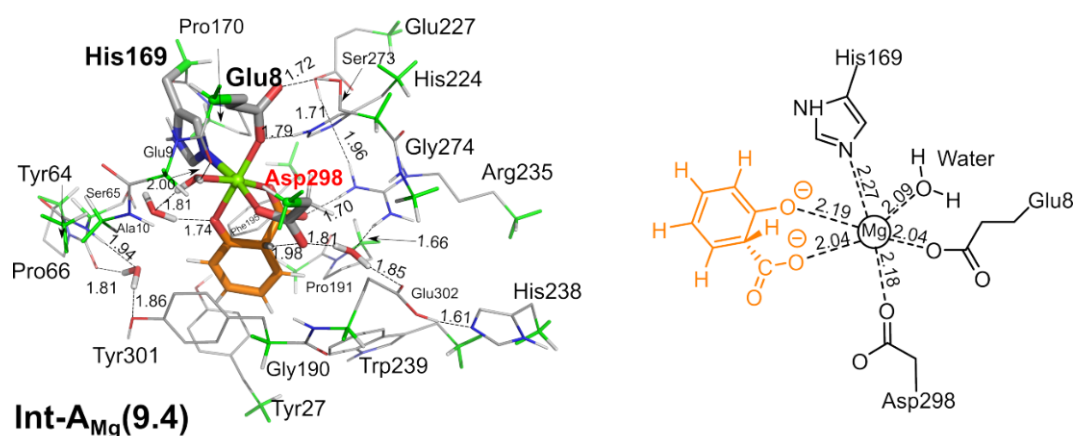

**Figure S2.** Optimized structure for the intermediate in the pathway with Mode-A for the Mg-enzyme.

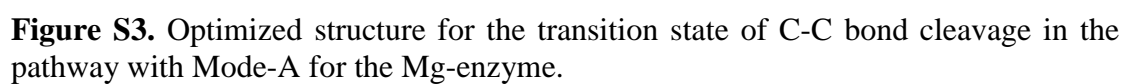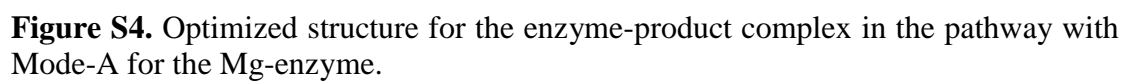

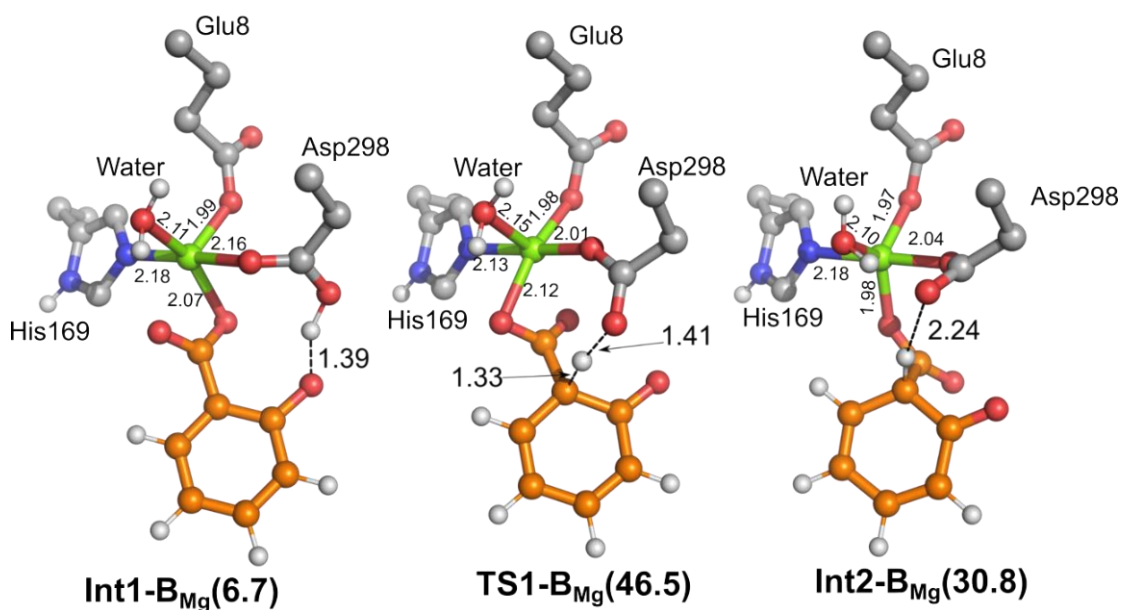

**Figure S5.** Optimized structures of the transition state (TS1-B<sub>Mg</sub>) and intermediates (Int1-B<sub>Mg</sub>, Int1-B<sub>Mg</sub>) in the pathway with **Mode-B** for the Mg-enzyme. The first intermediate (Int1-B<sub>Mg</sub>) is resulted by the proton transfer from the hydroxyl group of the substrate to Asp298 and the second intermediate (Int2-B<sub>Mg</sub>) is formed by the proton transfer from Asp298 to substrate C1. TS1-B<sub>Mg</sub> is the transition state of the second proton transfer. Only a part of the active site model is shown. The energies relative to E:S-A<sub>Mg</sub> are given in kcal/mol.

## 2. Optimized structures in the pathway of Zn-enzyme

Optimized structures for the enzyme-substrate complex (**E:S-A<sub>Zn</sub>**), transition states (**TS1-A<sub>Zn</sub>** and **TS2-A<sub>Zn</sub>**) and intermediates (**Int-A<sub>Zn</sub>** and **E:P-A<sub>Zn</sub>**) in the reaction pathway with Mode-A for the Zn-enzyme of SDC. The energies relative to the **E:S-A<sub>Zn</sub>** are given in the parentheses (kcal/mol).

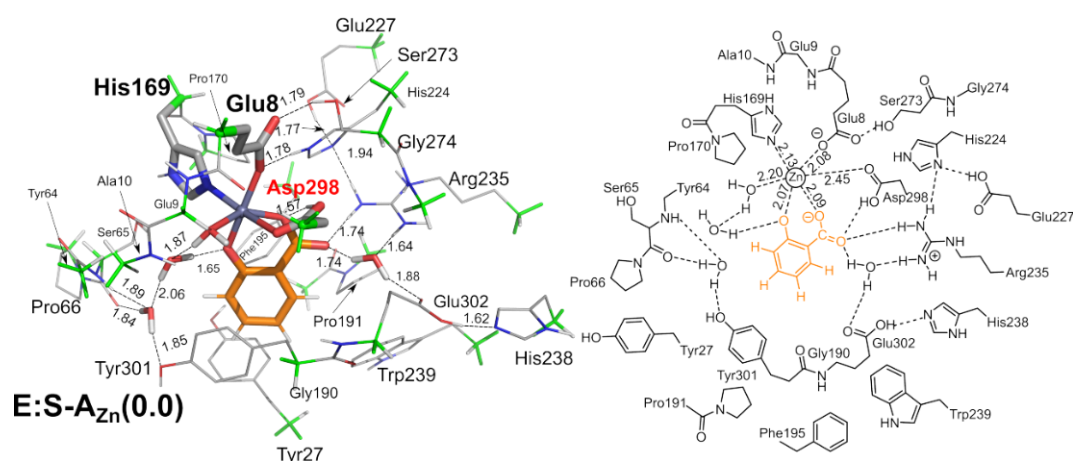

**Figure S6.** Optimized structure for the enzyme-substrate complex in the pathway with Mode-A for the Zn-enzyme.

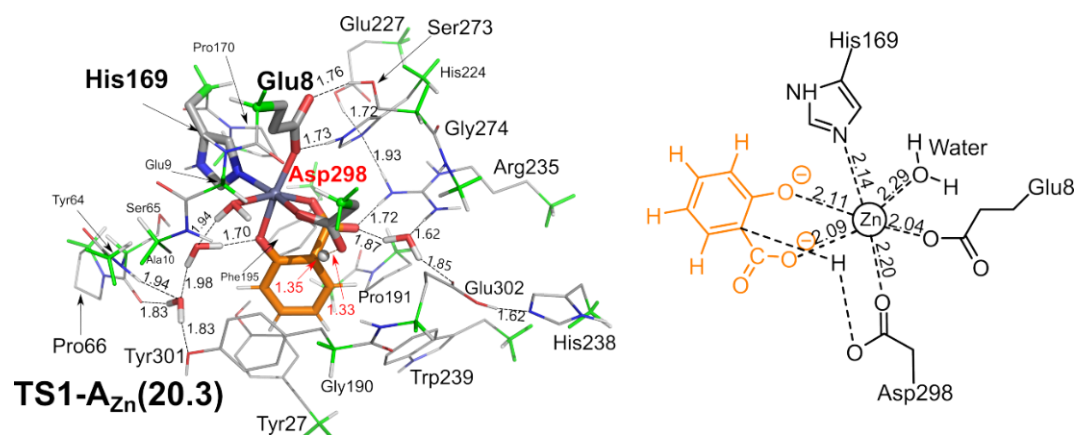

**Figure S7.** Optimized structure for the transition state of substrate protonation in the pathway with Mode-A for the Zn-enzyme.

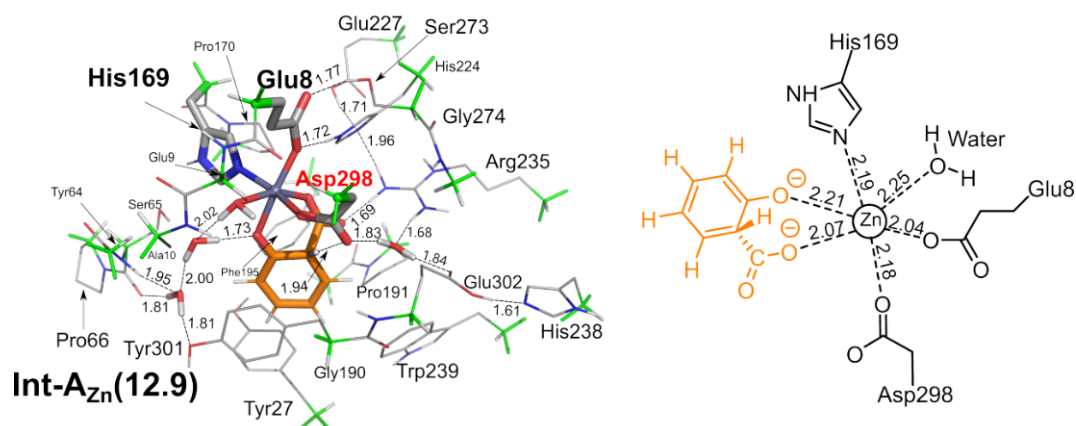

**Figure S8.** Optimized structure for the intermediate in the pathway with Mode-A for the Zn-enzyme.

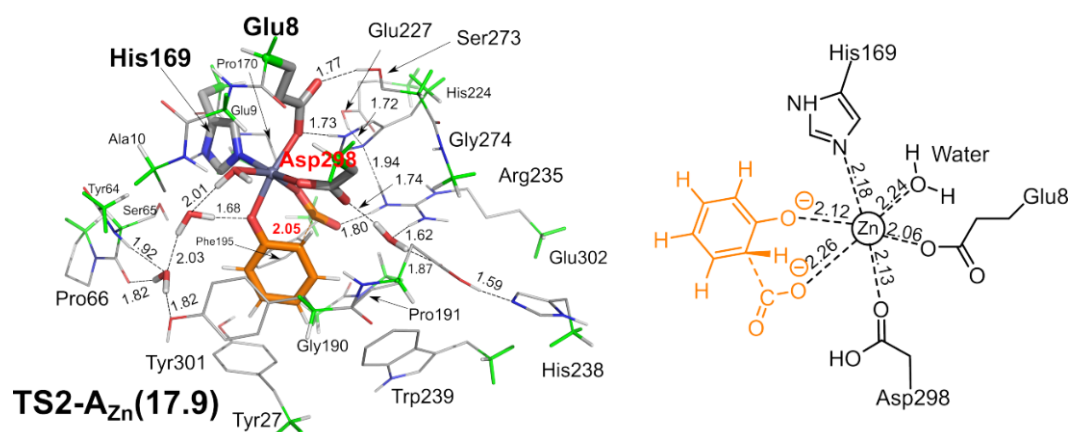

**Figure S9.** Optimized structure for the transition state of C-C bond cleavage in the pathway with Mode-A for the Zn-enzyme.

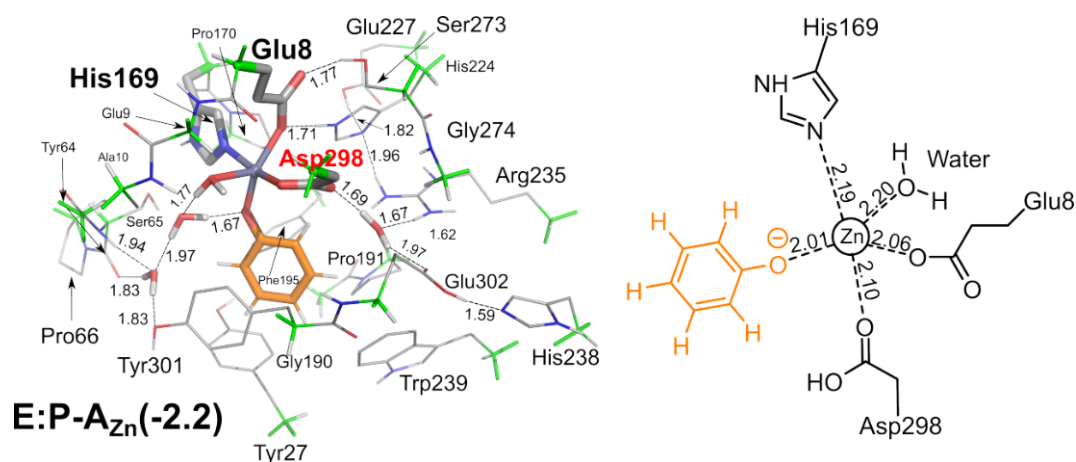

**Figure S10.** Optimized structure for the enzyme-product complex in the pathway with Mode-A for the Zn-enzyme.

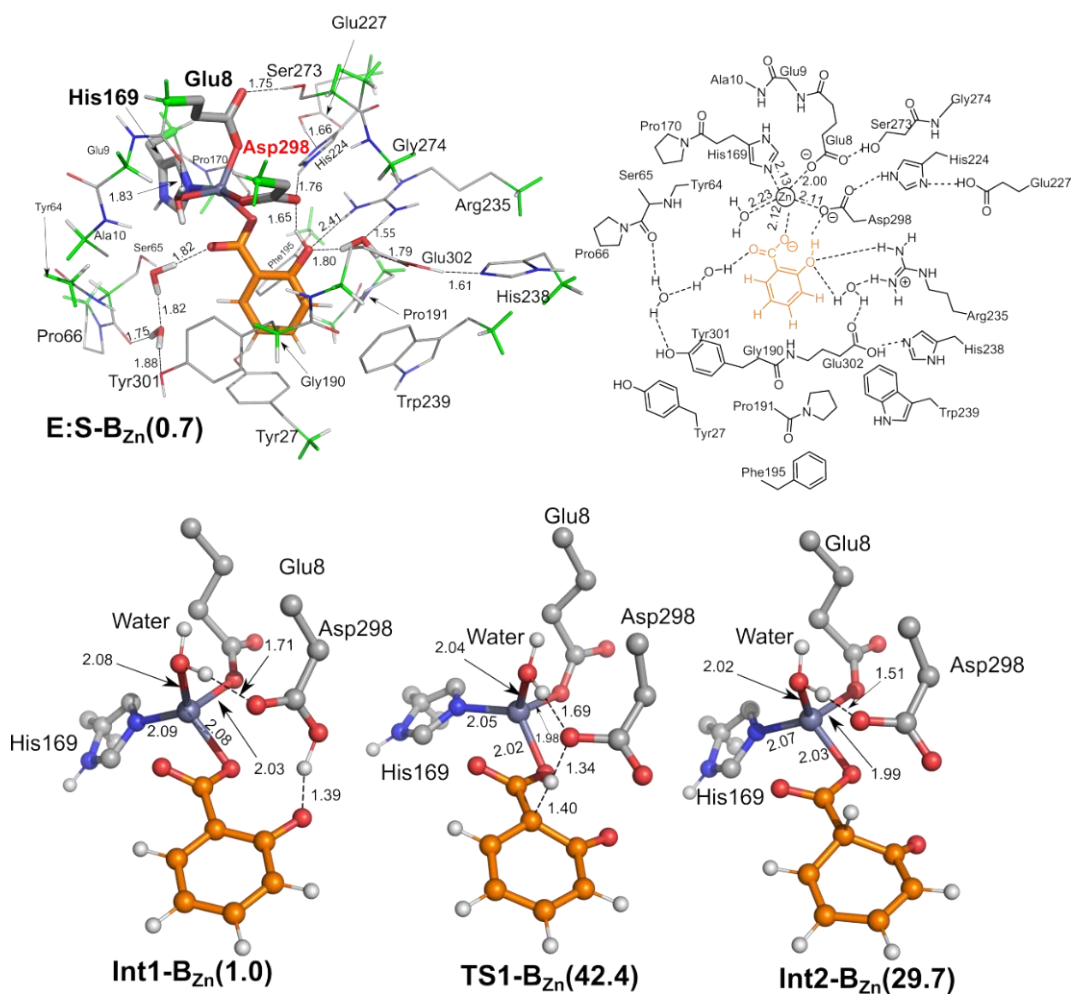

**Figure S11.** Optimized structures of the enzyme-substrate complex (**E:S-B<sub>Zn</sub>**), transition state (**TS1-B<sub>Zn</sub>**) and intermediates (**Int1-B<sub>Zn</sub>**, **Int2-B<sub>Zn</sub>**) in the pathway with **Mode-B** for the Zn-enzyme. Only a part of the active site model is shown. The energies relative to **E:S-A<sub>Zn</sub>** are given in kcal/mol.



### 3. Optimized structures in the pathway of Mn-enzyme

Optimized structures for the enzyme-substrate complex (**E:S-A<sub>Mn</sub>**), transition states (**TS1-A<sub>Mn</sub>** and **TS2-A<sub>Mn</sub>**) and intermediates (**Int-A<sub>Mn</sub>** and **E:P-A<sub>Mn</sub>**) in the reaction pathway with Mode-A for the Zn-enzyme of SDC. The energies relative to the **E:S-A<sub>Mn</sub>** are given in the parentheses (kcal/mol).

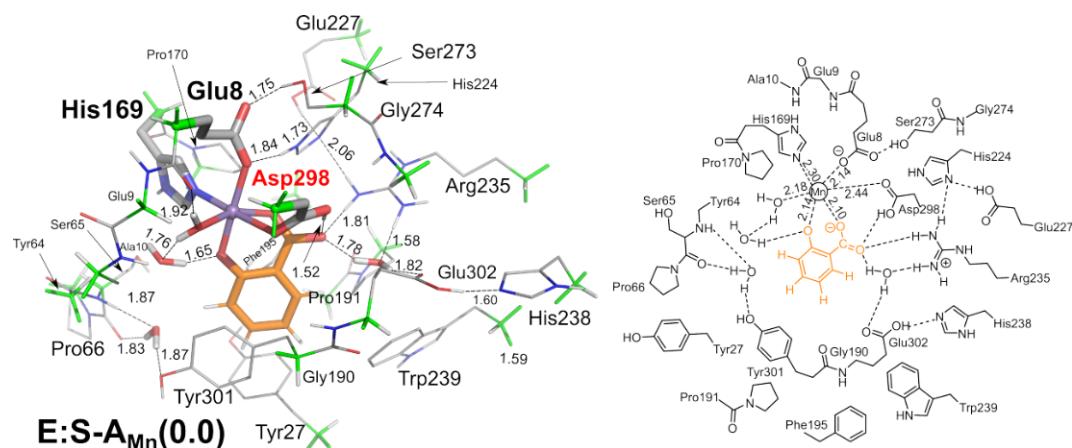

**Figure S12.** Optimized structure for the enzyme-substrate complex in the pathway with Mode-A for the Mn-enzyme.

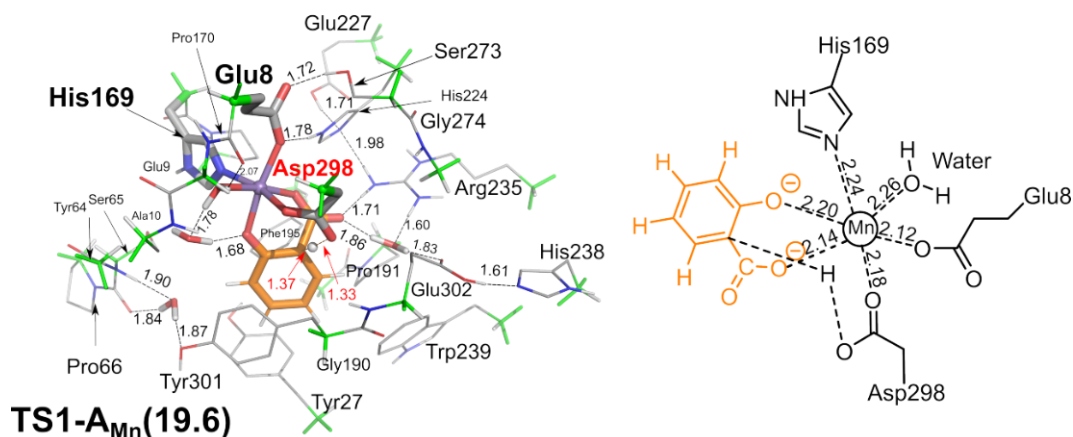

**Figure S13.** Optimized structure for the transition state of substrate protonation in the pathway with Mode-A for the Mn-enzyme.

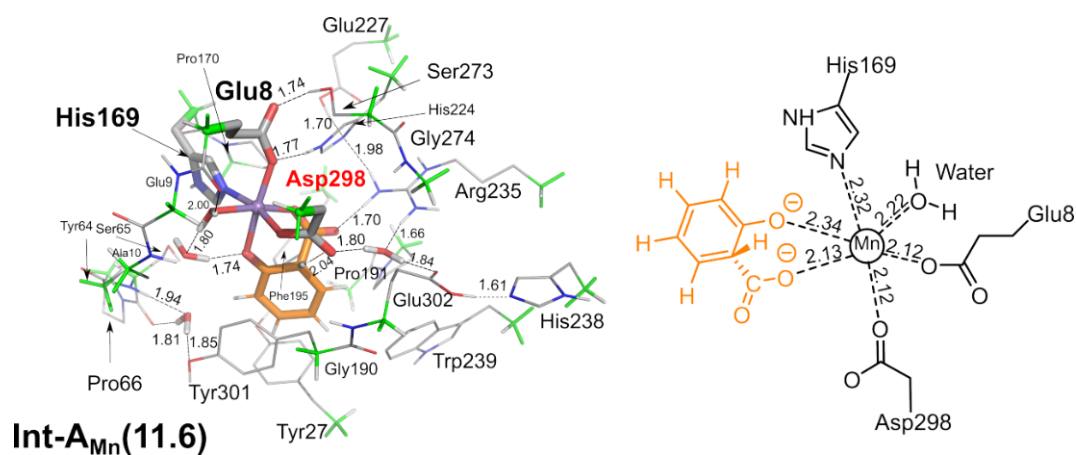

**Figure S14.** Optimized structure for the intermediate in the pathway with Mode-A for the Mn-enzyme.

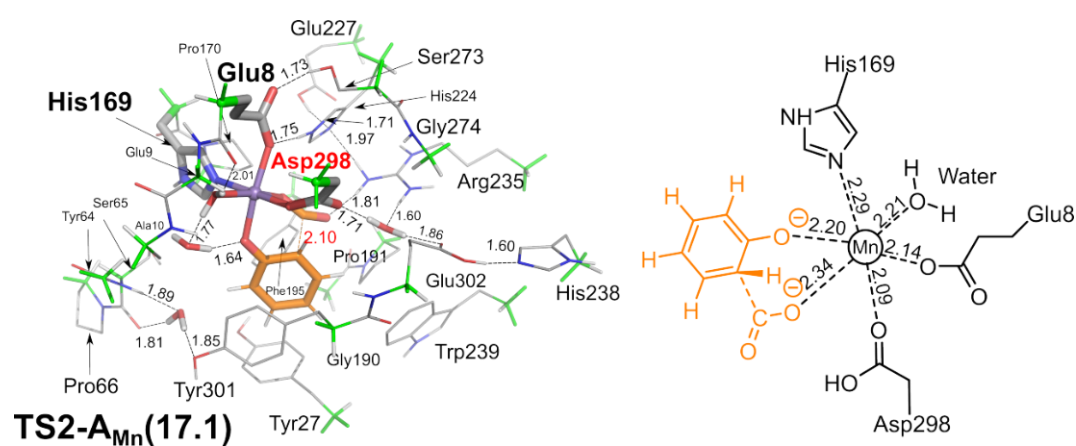

**Figure S15.** Optimized structure for the transition state of C-C bond cleavage in the pathway with Mode-A for the Mn-enzyme.

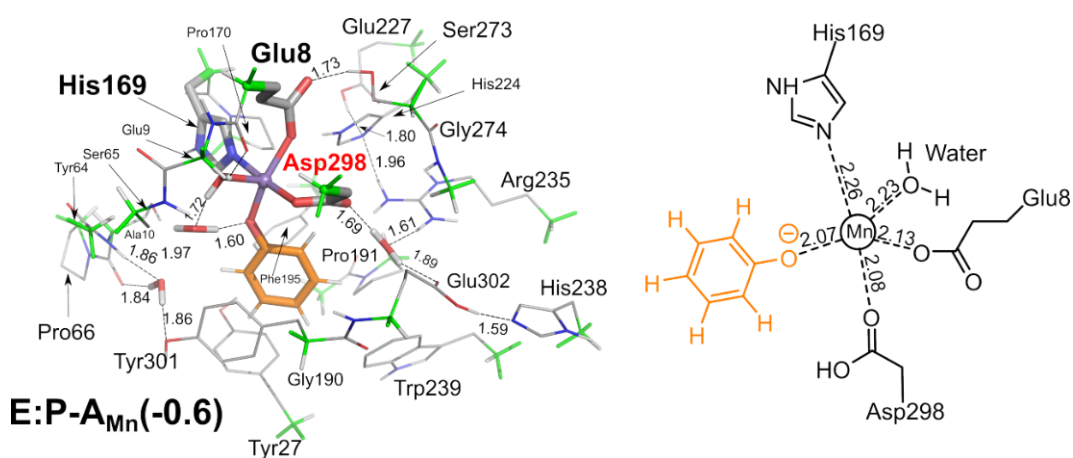

**Figure S16.** Optimized structure for the enzyme-product complex in the pathway with Mode-A for the Mn-enzyme.

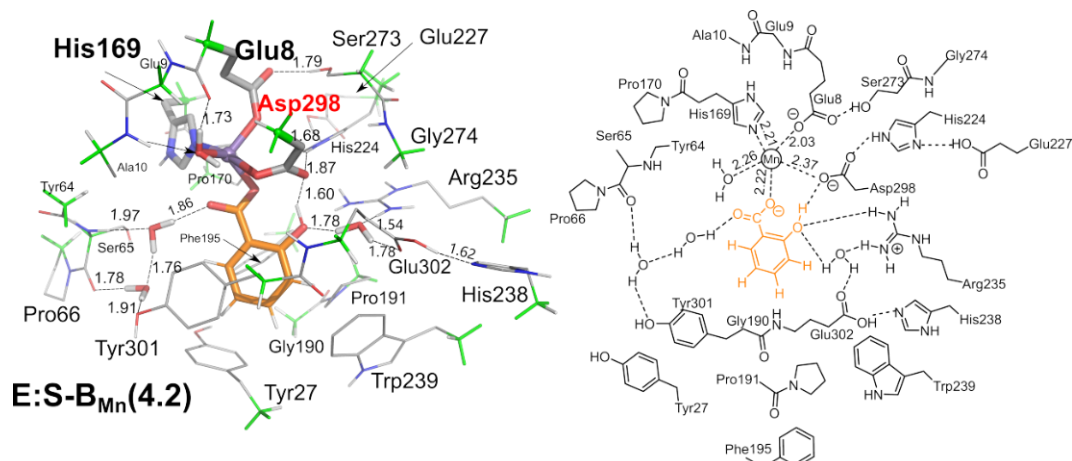

**Figure S17.** Optimized structure of the enzyme-substrate complex with **Mode-B** for the Mn-enzyme. The energy relative to **E:S-A<sub>Mn</sub>** is given in kcal/mol.

#### 4. Data collection and refinement statistics of TmSDC crystal

Table S1. Data collection and refinement statistics of TmSDC crystal.

|                                                       | TmSDC (WT)                                    |
|-------------------------------------------------------|-----------------------------------------------|
| <b><i>Data collection</i></b>                         |                                               |
| <b>Space group</b>                                    | P2 <sub>1</sub> 2 <sub>1</sub> 2 <sub>1</sub> |
| <b>Unit-cell</b>                                      |                                               |
| <b><i>a, b, c</i> [Å]</b>                             | 57.91/92.31/128.60                            |
| <b><i>α /β /γ</i> (°)</b>                             | 90/90/90                                      |
| <b>Resolution (Å)</b>                                 | 30.00 - 1.78 (1.84 - 1.78)                    |
| <b>Unique reflections</b>                             | 64395 (6204)                                  |
| <b>Redundancy</b>                                     | 5.9 (6.0)                                     |
| <b>Completeness (%)</b>                               | 96.1 (93.9)                                   |
| <b>Average I/σ(I)</b>                                 | 25.9 (3.2)                                    |
| <b>CC 1/2</b>                                         | 0.99 (0.74)                                   |
| <b><i>Refinement</i></b>                              |                                               |
| <b>R<sub>work</sub> (95% data)</b>                    | 0.165 (0.229)                                 |
| <b>R<sub>free</sub> (5% data)</b>                     | 0.194 (0.278)                                 |
| <b>Rmsd bonds (Å)</b>                                 | 0.016                                         |
| <b>Rmsd angles (°)</b>                                | 1.72                                          |
| <b>Dihedral angles</b>                                |                                               |
| <b>Most favored (%)</b>                               | 96.2                                          |
| <b>Allowed (%)</b>                                    | 3.8                                           |
| <b>Disallowed (%)</b>                                 | 0                                             |
| <b>Average B-factor/ Number of non-hydrogen atoms</b> |                                               |
| <b>Protein</b>                                        | 17.8 / 5730                                   |
| <b>ligands</b>                                        | 17.6 / 12                                     |
| <b>solvent</b>                                        | 28.5 / 823                                    |
| <b><i>PDB ID code</i></b>                             | 8H41                                          |

Values in parentheses are for the outermost resolution shells.

## 5. Cartesian coordinates

The transition states and intermediates involved in the reaction pathway with **Mode-A** for the Mg-enzyme of SDC.

### E:S-A<sub>Mg</sub> (0.0 kcal/mol)

|   |             |             |              |
|---|-------------|-------------|--------------|
| H | 20.66700300 | -6.80400000 | -16.56500000 |
| H | 16.39000500 | -5.37400700 | -12.30898900 |
| H | 24.65800200 | -6.75700000 | -19.16500100 |
| H | 29.36498400 | -8.34201700 | -18.18000100 |
| H | 35.11194200 | 4.87003000  | -6.01592700  |
| H | 32.10200100 | 7.76402000  | -10.35100000 |
| H | 33.92499400 | -0.03000100 | -10.21099500 |
| H | 31.94999300 | -4.27899000 | -6.58602100  |
| H | 23.18500000 | 1.49700400  | -4.32301200  |
| H | 22.41701500 | 4.62902600  | -7.60400500  |
| H | 22.25399900 | 6.38999800  | -15.14799900 |
| H | 33.53401600 | 5.46902100  | -6.68090600  |
| H | 30.78100100 | 8.84800100  | -10.93699500 |
| H | 23.93696900 | 6.31002400  | -15.82101900 |
| H | 23.80800200 | -0.12299700 | -3.81399900  |
| H | 32.79705500 | -3.33893500 | -5.29803100  |
| H | 32.07502000 | 0.82301300  | -17.96199600 |
| H | 30.43495400 | -3.27800700 | -15.73599000 |
| H | 31.70202300 | -4.16492500 | -14.93605400 |
| H | 30.41800400 | -9.05997400 | -14.20504400 |
| H | 20.88601600 | -5.04999600 | -16.84099500 |
| H | 34.15698400 | -4.71597100 | -10.10796200 |
| H | 23.72508500 | -8.30802500 | -7.05601700  |
| H | 21.59202100 | -3.72899900 | -7.32002500  |
| H | 27.89799600 | 0.15100100  | -17.74200100 |
| H | 27.15890700 | 4.34402900  | -6.69899600  |
| C | 29.55200300 | -8.45604300 | -13.91494300 |
| C | 29.05989800 | -7.64379200 | -15.10505500 |
| O | 28.82223700 | -6.43155500 | -15.08347500 |
| C | 29.77548000 | -7.56856400 | -12.68631400 |
| C | 28.43811300 | -7.07634700 | -12.10090300 |
| C | 28.64527000 | -6.00105200 | -11.03734800 |
| O | 29.42965300 | -6.24587300 | -10.10347700 |
| O | 27.98869100 | -4.89811700 | -11.14533800 |
| H | 28.76676100 | -9.19268100 | -13.68524900 |
| H | 30.33163100 | -8.10627300 | -11.91459500 |
| H | 30.38535000 | -6.70728800 | -12.97789900 |
| H | 27.77846700 | -6.70544600 | -12.88121000 |
| H | 27.93689500 | -7.92536200 | -11.61601200 |
| N | 28.92871800 | -8.36821100 | -16.23513100 |
| C | 28.69001800 | -7.77097600 | -17.53401000 |
| C | 27.23165100 | -7.97667600 | -17.94717700 |
| O | 26.76839400 | -9.10571200 | -18.05502200 |
| H | 29.02824500 | -9.37130600 | -16.20011000 |
| H | 28.99729500 | -6.72538900 | -17.49103000 |
| N | 26.51434800 | -6.83388000 | -18.11320500 |
| C | 25.05599600 | -6.84000100 | -18.14800000 |
| C | 24.50129400 | -5.71855200 | -17.27817900 |
| H | 26.96256900 | -5.96261700 | -17.86733900 |
| H | 24.74041000 | -7.81989400 | -17.77844500 |
| H | 23.41144300 | -5.68975500 | -17.34107600 |
| H | 24.77706200 | -5.85250000 | -16.23095300 |
| H | 24.86773900 | -4.73596500 | -17.59661500 |
| C | 23.25804100 | 6.03496100  | -15.04098300 |
| C | 23.21366000 | 4.49345400  | -14.99267500 |
| C | 22.29351000 | 3.92046800  | -13.94178700 |
| C | 22.59019200 | 4.04808800  | -12.57941500 |
| C | 21.14505100 | 3.19843000  | -14.29054100 |
| C | 21.79832200 | 3.45025000  | -11.60574800 |
| C | 20.33554900 | 2.59479100  | -13.32915600 |
| C | 20.67250300 | 2.71005100  | -11.97850700 |
| O | 19.88229600 | 2.08038900  | -11.05775300 |
| H | 23.64598400 | 6.44119500  | -14.10000200 |
| H | 22.89984700 | 4.12344100  | -15.97570700 |
| H | 24.22774200 | 4.10283700  | -14.83940900 |
| H | 23.47889100 | 4.59143100  | -12.26964500 |
| H | 20.89133200 | 3.08569700  | -15.34184200 |
| H | 22.06793500 | 3.52746700  | -10.55894800 |
| H | 19.46106800 | 2.01558700  | -13.60629300 |
| H | 20.30976100 | 2.15072300  | -10.19243300 |
| C | 20.86196700 | -5.84000000 | -16.08300700 |
| C | 19.87952500 | -5.67147200 | -14.93053600 |
| O | 19.27131600 | -6.63192100 | -14.46714700 |
| H | 21.87062800 | -5.89398500 | -15.65559100 |
| N | 19.79977100 | -4.41391400 | -14.40318600 |
| C | 19.19502900 | -4.19798800 | -13.09496900 |
| C | 18.17168300 | -3.06963600 | -13.16159500 |
| O | 18.44179900 | -1.97440400 | -13.68291700 |
| C | 20.33311500 | -3.89955300 | -12.09433500 |
| O | 19.90172900 | -3.82910800 | -10.73647600 |
| H | 20.36579400 | -3.64303000 | -14.77013000 |
| H | 18.72438500 | -5.14225700 | -12.82466000 |
| H | 21.03846400 | -4.73349900 | -12.15847000 |
| H | 20.85853400 | -2.98759800 | -12.40118700 |
| H | 19.66826300 | -2.91321600 | -10.54066000 |

|   |             |             |              |
|---|-------------|-------------|--------------|
| C | 23.90588100 | -7.35592000 | -7.56599700  |
| C | 22.91426000 | -6.30367100 | -7.09152800  |
| O | 21.74503700 | -6.60748500 | -6.84557900  |
| C | 23.64938600 | -7.58935000 | -9.08439300  |
| C | 23.97801400 | -6.40079600 | -9.92892700  |
| C | 25.16078600 | -6.04336500 | -10.52574600 |
| N | 23.13346100 | -5.31843500 | -10.14520600 |
| C | 23.82147900 | -4.37018300 | -10.83633400 |
| N | 25.05599900 | -4.78418300 | -11.08052100 |
| H | 24.94752800 | -7.06793700 | -7.40706100  |
| H | 24.26105700 | -8.42928600 | -9.42685300  |
| H | 22.60055200 | -7.87916000 | -9.20866300  |
| H | 22.18683800 | -5.21542200 | -9.80134000  |
| H | 26.08005900 | -6.60214400 | -10.57307000 |
| H | 23.41491900 | -3.42153300 | -11.15005200 |
| N | 23.32795400 | -5.00609600 | -7.09139200  |
| C | 22.40700000 | -3.96403300 | -6.62797700  |
| C | 23.30789000 | -2.75474500 | -6.36171800  |
| C | 24.50770800 | -2.97726100 | -7.28946600  |
| C | 24.70680800 | -4.49575100 | -7.24482300  |
| H | 21.90285800 | -4.31513800 | -5.72118100  |
| H | 22.79596700 | -1.81336900 | -6.55136500  |
| H | 23.64366600 | -2.75698000 | -5.31920200  |
| H | 24.27258600 | -2.65178600 | -8.30808300  |
| H | 25.39884100 | -2.44229400 | -6.95876200  |
| H | 25.17499300 | -4.88130600 | -8.15077300  |
| H | 25.32910500 | -4.77508400 | -6.38479200  |
| C | 23.17495000 | 4.07097600  | -8.16499400  |
| C | 24.47017800 | 3.93688600  | -7.38429300  |
| O | 24.49579100 | 3.84501900  | -6.15625400  |
| H | 22.78186000 | 3.06987600  | -8.36587300  |
| H | 23.32234600 | 4.57866500  | -9.12075200  |
| N | 25.60352900 | 3.90715400  | -8.13819100  |
| C | 26.90912800 | 3.66698800  | -7.52200700  |
| C | 27.87943200 | 3.79168800  | -8.69954900  |
| C | 27.07387200 | 3.20386700  | -9.86098400  |
| C | 25.65992100 | 3.74125400  | -9.60698300  |
| H | 26.94021000 | 2.64949800  | -7.10470300  |
| H | 28.09911000 | 4.84647700  | -8.89452400  |
| H | 28.82282700 | 3.27212300  | -8.52313600  |
| H | 27.45312200 | 3.49304300  | -10.84057100 |
| H | 27.07667000 | 2.11222400  | -9.80769600  |
| H | 25.51525200 | 4.70732300  | -10.10601700 |
| H | 24.89310000 | 3.04798700  | -9.95994600  |
| C | 23.37400000 | 0.46299000  | -4.62998300  |
| C | 24.29421500 | 0.47176200  | -5.86091800  |
| C | 23.61371600 | 0.54530600  | -7.21714700  |
| C | 22.22522700 | 0.60715800  | -7.38618600  |
| C | 24.40823400 | 0.48562700  | -8.37515700  |
| C | 21.64739500 | 0.55066000  | -8.66082600  |
| C | 23.84074300 | 0.44915400  | -9.64626600  |
| C | 22.45024500 | 0.46407400  | -9.79731500  |
| H | 22.41171400 | -0.01292400 | -4.84065800  |
| H | 24.98128400 | 1.32122600  | -5.77902700  |
| H | 24.92202200 | -0.42686900 | -5.86394400  |
| H | 21.57713200 | 0.68044400  | -6.52060400  |
| H | 25.49076600 | 0.44957500  | -8.27394800  |
| H | 20.56283900 | 0.54299700  | -8.75195700  |
| H | 24.47336200 | 0.39353000  | -10.52095600 |
| H | 22.01752000 | 0.40557300  | -10.78980200 |
| C | 32.20595300 | -3.28008100 | -6.21793300  |
| C | 30.88608300 | -2.51640300 | -5.98561700  |
| C | 29.88181900 | -2.76942700 | -7.07496100  |
| C | 30.01622900 | -3.58116200 | -8.17474600  |
| N | 28.59098700 | -2.22925400 | -7.06537200  |
| C | 27.98794100 | -2.72662600 | -8.15187400  |
| N | 28.80924500 | -3.53862300 | -8.83614700  |
| H | 32.79517000 | -2.81121500 | -7.00598600  |
| H | 30.44051200 | -2.80726400 | -5.02549500  |
| H | 31.08134100 | -1.43821700 | -5.89703500  |
| H | 27.72385700 | -2.92566700 | -5.69188600  |
| H | 30.84549300 | -4.16522900 | -8.53922800  |
| H | 26.99198100 | -2.49016100 | -8.48945800  |
| H | 28.55544000 | -4.07117700 | -9.68318300  |
| C | 33.48001200 | -4.18202100 | -10.78307400 |
| C | 33.31216800 | -2.74271800 | -10.32643200 |
| O | 32.95898200 | -2.40736700 | -9.20131600  |
| C | 32.16445400 | -4.97740500 | -10.82016400 |
| O | 31.99442900 | -5.64862300 | -9.59235500  |
| H | 33.94144100 | -4.19983500 | -11.77797500 |
| H | 31.31875900 | -4.30655500 | -11.02497600 |
| H | 32.21849200 | -5.69607200 | -11.65517600 |
| H | 31.08934800 | -6.02286200 | -9.62614600  |
| N | 33.57143900 | -1.80577600 | -11.28701200 |
| C | 33.30500800 | -0.40200700 | -11.03299500 |
| H | 33.78163900 | -2.10348200 | -12.22555900 |
| H | 33.55059300 | 0.17171600  | -11.92878600 |
| H | 32.25256900 | -0.24186300 | -10.79464600 |
| C | 30.70403000 | -3.79207500 | -14.83692700 |
| C | 30.73084700 | -2.82207100 | -13.64635900 |
| C | 29.45725200 | -2.77491300 | -12.85168500 |
| O | 28.36064100 | -3.08070700 | -13.33856900 |
| O | 29.64357800 | -2.38057600 | -11.61518000 |
| H | 30.02139800 | -4.62569500 | -14.67784700 |
| H | 31.53031600 | -3.06076900 | -12.94094200 |
| H | 30.92904000 | -1.79196800 | -13.96728000 |
| C | 27.87500800 | 1.06299600  | -17.13699800 |
| C | 29.24852800 | 1.55941900  | -16.73385900 |
| O | 29.41572900 | 2.61297900  | -16.12241800 |

|   |             |             |              |
|---|-------------|-------------|--------------|
| C | 27.01367500 | 0.79945700  | -15.88082300 |
| C | 25.59912800 | 0.42043700  | -16.23256200 |
| C | 24.68007000 | 1.40265000  | -16.61524300 |
| C | 25.16671500 | -0.90862300 | -16.18742400 |
| C | 23.36402500 | 1.07411200  | -16.93129700 |
| C | 23.85662700 | -1.25913100 | -16.50278200 |
| C | 22.95884100 | -0.25890200 | -16.86622300 |
| O | 21.65060100 | -0.63686600 | -17.12183100 |
| H | 27.40350900 | 1.84650500  | -17.73922400 |
| H | 27.47158800 | 0.00264900  | -15.28431500 |
| H | 27.02197700 | 1.69520900  | -15.25522500 |
| H | 24.98791400 | 2.44423600  | -16.64235200 |
| H | 25.84812400 | -1.68477400 | -15.85088800 |
| H | 22.65333200 | 1.85177500  | -17.20277100 |
| H | 23.52676100 | -2.28525500 | -16.38956600 |
| H | 21.13118400 | 0.15264600  | -17.32288000 |
| N | 30.27400500 | 0.73636300  | -17.07443800 |
| C | 31.68296600 | 1.10898400  | -16.98000300 |
| C | 32.39305000 | 0.40193100  | -15.82610300 |
| C | 31.84663100 | 0.85274000  | -14.47152600 |
| C | 32.27016900 | 2.24044700  | -14.02354900 |
| O | 33.23136800 | 2.77020400  | -14.75361800 |
| O | 31.78808000 | 2.78736200  | -13.03068200 |
| H | 30.04996600 | -0.09286400 | -17.60260100 |
| H | 31.73788600 | 2.19273200  | -16.86789100 |
| H | 32.24928600 | -0.68118800 | -15.92835800 |
| H | 33.46749000 | 0.59709600  | -15.88478600 |
| H | 30.75472900 | 0.82331000  | -14.45852100 |
| H | 32.15491200 | 0.17285300  | -13.67113900 |
| C | 27.09096200 | -0.82387100 | -11.37845700 |
| O | 27.17813800 | -2.07108000 | -11.04468300 |
| O | 27.91394300 | 0.02325200  | -10.92013600 |
| C | 26.00952500 | -0.35140300 | -12.25842600 |
| C | 25.00256900 | -1.21496200 | -12.78392600 |
| O | 25.12262400 | -2.52474500 | -12.82085100 |
| C | 23.81980800 | -0.60614700 | -13.28260000 |
| C | 23.71189100 | 0.76736400  | -13.39995700 |
| C | 24.78094200 | 1.60488900  | -13.03586400 |
| C | 25.90010800 | 1.04179400  | -12.45681800 |
| H | 28.73909100 | -2.27591900 | -11.16500400 |
| H | 23.01061000 | -1.24453600 | -13.62228800 |
| H | 22.80181800 | 1.19557800  | -13.80294300 |
| H | 24.71963800 | 2.67592700  | -13.16676400 |
| H | 26.71015700 | 1.66680500  | -12.10531300 |
| O | 26.35412100 | -5.04530600 | -13.79802300 |
| H | 25.53393600 | -4.80943600 | -14.29732300 |
| H | 27.09206600 | -5.19832000 | -14.40733900 |
| O | 24.08126100 | -3.94065700 | -14.69292500 |
| H | 23.20517900 | -4.23461700 | -14.41555800 |
| H | 24.36313300 | -3.27196400 | -13.98951300 |
| O | 21.02566600 | -1.93067900 | -14.66969600 |
| H | 21.13781800 | -1.48944900 | -15.52928900 |
| H | 20.12690000 | -1.70438800 | -14.34799200 |
| C | 34.22903000 | 4.62593900  | -6.61618500  |
| C | 33.56315800 | 3.35524500  | -6.06850600  |
| C | 32.24642800 | 2.98348600  | -6.76799700  |
| C | 31.91680800 | 1.49001500  | -6.58636000  |
| N | 30.54783700 | 1.11057200  | -6.92999800  |
| C | 30.09606700 | 0.92554500  | -8.19386600  |
| N | 30.78141400 | 1.41648400  | -9.22576600  |
| N | 28.93085200 | 0.30876600  | -8.37528100  |
| H | 34.58311000 | 4.44201800  | -7.63904200  |
| H | 34.27337300 | 2.52358900  | -6.17015500  |
| H | 33.37598000 | 3.46044500  | -4.99287000  |
| H | 31.41831600 | 3.58659000  | -6.37957600  |
| H | 32.32771300 | 3.23591500  | -7.83360600  |
| H | 32.62345500 | 0.87331800  | -7.15748000  |
| H | 32.05154200 | 1.22280000  | -5.53499900  |
| H | 29.97725400 | 0.70351900  | -6.20302000  |
| H | 31.61220700 | 1.95475100  | -9.05523800  |
| H | 30.54540300 | 1.17733500  | -10.21832700 |
| H | 28.66147000 | -0.40192700 | -7.68574300  |
| H | 28.59781000 | 0.13067100  | -9.33928900  |
| C | 31.09199500 | 7.81099700  | -10.76999600 |
| C | 30.08806800 | 7.05151000  | -9.88402700  |
| C | 28.76709700 | 6.82748600  | -10.55762200 |
| C | 27.57568000 | 7.45287000  | -10.28671700 |
| C | 28.51248300 | 5.91316500  | -11.64897700 |
| C | 27.13710400 | 6.03966500  | -11.99105500 |
| C | 29.30397200 | 4.98594500  | -12.35143000 |
| N | 26.59191300 | 6.98758800  | -11.14553500 |
| C | 26.54642400 | 5.27618200  | -13.00283000 |
| C | 28.72397900 | 4.22833000  | -13.36256200 |
| C | 27.35857900 | 4.37553900  | -13.68376700 |
| H | 31.14438100 | 7.33610500  | -11.75614000 |
| H | 30.51974900 | 6.07768400  | -9.61440600  |
| H | 29.93839300 | 7.59060800  | -8.94131300  |
| H | 27.34427300 | 8.19818400  | -9.53901800  |
| H | 25.62944300 | 7.28057100  | -11.14031800 |
| H | 30.35695500 | 4.85491500  | -12.12238400 |
| H | 25.49754000 | 5.38924500  | -13.25505500 |
| H | 29.32467900 | 3.53399600  | -13.93725100 |
| H | 26.94273200 | 3.78174900  | -14.49061000 |
| O | 30.26397200 | 0.84537300  | -11.80534100 |
| H | 30.45295400 | 1.68496800  | -12.26478200 |
| H | 29.29821800 | 0.68056500  | -11.75142100 |
| N | 16.95469900 | -3.31930000 | -12.63978000 |
| C | 16.59799000 | -4.44999100 | -11.75903700 |
| C | 15.33368200 | -3.94260400 | -11.04534900 |

|    |             |             |              |
|----|-------------|-------------|--------------|
| C  | 14.69185500 | -3.00252400 | -12.07718500 |
| C  | 15.90139100 | -2.29360700 | -12.69345200 |
| H  | 17.41143400 | -4.65280700 | -11.05923800 |
| H  | 14.68007200 | -4.76106100 | -10.73516100 |
| H  | 15.61374000 | -3.37768100 | -10.14940200 |
| H  | 14.16782000 | -3.58462400 | -12.84324300 |
| H  | 13.97747300 | -2.30204100 | -11.63834400 |
| H  | 15.75145300 | -1.96602900 | -13.72474700 |
| H  | 16.20566700 | -1.41495700 | -12.11104400 |
| C  | 29.55101400 | -2.94402000 | -1.16198900  |
| C  | 28.26525700 | -3.75606900 | -1.35117200  |
| C  | 28.03423900 | -4.24188400 | -2.78309600  |
| C  | 27.85311000 | -3.13489100 | -3.80725200  |
| O  | 28.01218000 | -1.94535100 | -3.59866100  |
| O  | 27.53021500 | -3.62974200 | -5.00913100  |
| H  | 29.53853200 | -2.10752900 | -1.86478000  |
| H  | 28.26224600 | -4.62671500 | -0.68412300  |
| H  | 27.41379200 | -3.13276000 | -1.05339200  |
| H  | 28.87933700 | -4.85028900 | -3.13281100  |
| H  | 27.15879200 | -4.89887500 | -2.84548900  |
| H  | 30.46537800 | -3.51014700 | -1.36794700  |
| H  | 29.56604500 | -2.49724500 | -0.16239600  |
| C  | 34.86196400 | 8.00000900  | -10.31596000 |
| C  | 35.22942000 | 6.50223100  | -10.33219500 |
| C  | 35.05396800 | 5.89246100  | -11.68503300 |
| C  | 34.12531900 | 5.01956800  | -12.19831100 |
| N  | 35.85691100 | 6.22554800  | -12.76675800 |
| C  | 35.40107100 | 5.55603000  | -13.86088600 |
| N  | 34.35446800 | 4.82047500  | -13.54533800 |
| H  | 35.56703400 | 8.59423100  | -10.90668600 |
| H  | 36.25518800 | 6.35170600  | -9.97097600  |
| H  | 34.57769100 | 5.96184400  | -9.63842700  |
| H  | 36.64042200 | 6.86057700  | -12.74481300 |
| H  | 33.30775300 | 4.51565300  | -11.70457700 |
| H  | 35.85672800 | 5.63115400  | -14.83711600 |
| H  | 33.57877400 | 3.63500600  | -14.32974900 |
| H  | 34.87101900 | 8.38159600  | -9.28968300  |
| H  | 33.87106300 | 8.09547700  | -10.77201900 |
| Mg | 26.64079100 | -3.72966900 | -12.17394200 |

### TS1-A<sub>Mg</sub> (16.6 kcal/mol)

|   |             |             |              |
|---|-------------|-------------|--------------|
| H | 20.66699000 | -6.80399700 | -16.56500100 |
| H | 16.39000700 | -5.37401200 | -12.30898100 |
| H | 24.65799900 | -6.75700700 | -19.16500000 |
| H | 29.36499700 | -8.34200900 | -18.17999400 |
| H | 35.11193200 | 4.87003800  | -6.01591600  |
| H | 32.10199800 | 7.76400700  | -10.35099500 |
| H | 33.92500200 | -0.03000800 | -10.21099800 |
| H | 31.95001000 | -4.27900700 | -6.58598500  |
| H | 23.18501000 | 1.49700800  | -4.32301900  |
| H | 22.41702300 | 4.62903800  | -7.60400600  |
| H | 22.25399800 | 6.38997800  | -15.14805900 |
| H | 33.53402500 | 5.46902900  | -6.68089400  |
| H | 30.78102500 | 8.84801000  | -10.93698300 |
| H | 23.93695500 | 6.31002100  | -15.82103200 |
| H | 23.80798900 | -0.12301600 | -3.81400600  |
| H | 32.79703100 | -3.33892000 | -5.29801500  |
| H | 32.07499800 | 0.82298500  | -17.96199700 |
| H | 30.43534600 | -3.27780400 | -15.73599100 |
| H | 31.70208700 | -4.16474900 | -14.93607700 |
| H | 30.41806900 | -9.05985200 | -14.20510400 |
| H | 20.88601600 | -5.04999800 | -16.84099700 |
| H | 34.15696100 | -4.71598700 | -10.10795100 |
| H | 23.72495000 | -8.30800900 | -7.05603500  |
| H | 21.59204800 | -3.72899400 | -7.32005500  |
| H | 27.89798600 | 0.15101700  | -17.74202500 |
| H | 27.15884400 | 4.34404500  | -6.69899000  |
| C | 29.55193000 | -8.45618600 | -13.91484700 |
| C | 29.02335800 | -7.65711500 | -15.09585900 |
| O | 28.70630000 | -6.46373900 | -15.05661300 |
| C | 29.80103100 | -7.57096000 | -12.69023200 |
| C | 28.48018200 | -7.18374100 | -12.00062100 |
| C | 28.71058000 | -6.09057900 | -10.96036600 |
| O | 29.48127100 | -6.34343300 | -10.01739300 |
| O | 28.10686600 | -4.96605900 | -11.11956300 |
| H | 28.77674500 | -9.19687900 | -13.66385000 |
| H | 30.44587800 | -8.08053200 | -11.96984300 |
| H | 30.32627300 | -6.66463700 | -13.00864800 |
| H | 27.74131900 | -6.86184700 | -12.73084800 |
| H | 28.08821500 | -8.06802400 | -11.48103500 |
| N | 28.94829400 | -8.36971000 | -16.23869000 |
| C | 28.68998400 | -7.77099000 | -17.53401700 |
| C | 27.23027100 | -7.97909000 | -17.94320100 |
| O | 26.76643300 | -9.10690000 | -18.05646000 |
| H | 29.12618400 | -9.36199300 | -16.21576500 |
| H | 28.99351300 | -6.72360600 | -17.49676600 |
| N | 26.51412600 | -6.83460100 | -18.10838100 |
| C | 25.05601700 | -6.83998400 | -18.14799800 |
| C | 24.49925300 | -5.70790200 | -17.29169200 |
| H | 26.96030000 | -5.96698700 | -17.84591500 |
| H | 24.73548300 | -7.81599100 | -17.77262100 |
| H | 23.40910700 | -5.68509700 | -17.34929000 |
| H | 24.77615500 | -5.82049200 | -16.24254100 |
| H | 24.86061700 | -4.73031000 | -17.63340600 |
| C | 23.25808800 | 6.03494100  | -15.04087500 |
| C | 23.26875900 | 4.48880000  | -15.03046700 |
| C | 22.42494300 | 3.82340000  | -13.97205700 |
| C | 22.76987200 | 3.90718500  | -12.61756300 |

|   |             |             |              |   |             |             |              |
|---|-------------|-------------|--------------|---|-------------|-------------|--------------|
| C | 21.30873500 | 3.04823900  | -14.31298400 | H | 30.91452000 | -4.03594900 | -8.58990400  |
| C | 22.04459300 | 3.22951800  | -11.64347400 | H | 27.00323800 | -2.50695200 | -8.49703100  |
| C | 20.56781400 | 2.36329500  | -13.35131800 | H | 28.62796900 | -3.94638300 | -9.76501500  |
| C | 20.94082200 | 2.45117100  | -12.00798800 | C | 33.48008600 | -4.18196000 | -10.78309800 |
| O | 20.20571800 | 1.76028800  | -11.08812900 | C | 33.35330000 | -2.74034900 | -10.31916400 |
| H | 23.64619900 | 6.43354800  | -14.09701600 | O | 33.08961400 | -2.40302000 | -9.16999600  |
| H | 22.94010800 | 4.13680000  | -16.01573900 | C | 32.15868600 | -4.96511600 | -10.78811100 |
| H | 24.30736500 | 4.14731400  | -14.92563600 | O | 31.99237700 | -5.58956400 | -9.53906300  |
| H | 23.64070000 | 4.48350900  | -12.31693500 | H | 33.92497200 | -4.20954700 | -11.78475100 |
| H | 21.02448300 | 2.96341200  | -15.35894000 | H | 31.31544200 | -4.29319400 | -11.01483100 |
| H | 22.34581400 | 3.27957200  | -10.60411100 | H | 32.19642600 | -5.70840900 | -11.60159000 |
| H | 19.71786500 | 1.74593000  | -13.62224800 | H | 31.08952700 | -5.97671900 | -9.55606000  |
| H | 20.64943800 | 1.82754600  | -10.23047000 | N | 33.56014000 | -1.80666200 | -11.29478900 |
| C | 20.86198300 | -5.83999800 | -16.08300400 | C | 33.30498800 | -0.40202700 | -11.03298900 |
| C | 19.84579700 | -5.63713500 | -14.96913400 | H | 33.63269600 | -2.11207700 | -12.25222100 |
| O | 19.07850600 | -6.52932300 | -14.62030000 | H | 33.55866800 | 0.17158900  | -11.92747600 |
| H | 21.86511100 | -5.86959400 | -15.64355800 | H | 32.25334100 | -0.22412600 | -10.79992700 |
| N | 19.90595800 | -4.42377700 | -14.33970900 | C | 30.70344300 | -3.79243000 | -14.83688600 |
| C | 19.19503500 | -4.19798000 | -13.09496900 | C | 30.49719300 | -2.78521600 | -13.69117000 |
| C | 18.15572400 | -3.08760700 | -13.21389900 | C | 29.03244900 | -2.36086400 | -13.62249500 |
| O | 18.40822400 | -2.01128100 | -13.78224800 | O | 28.16775600 | -3.26144500 | -13.55153700 |
| C | 20.24084300 | -3.87449400 | -12.00202700 | O | 28.75658500 | -1.10529500 | -13.64553900 |
| O | 19.67873900 | -3.68200400 | -10.70775300 | H | 30.02524600 | -4.63882000 | -14.71711600 |
| H | 20.55484200 | -3.68841500 | -14.62637100 | H | 30.72487200 | -3.24050300 | -12.72118800 |
| H | 18.70883600 | -5.14365300 | -12.85696800 | H | 31.12719300 | -1.90108600 | -13.80142500 |
| H | 20.90966400 | -4.73790200 | -11.92987400 | C | 27.87501600 | 1.06296300  | -17.13697700 |
| H | 20.83513800 | -3.00919600 | -12.31756000 | C | 29.24570900 | 1.57689200  | -16.74868200 |
| H | 19.39175100 | -2.76238100 | -10.64166600 | O | 29.40658500 | 2.63493400  | -16.14246900 |
| C | 23.90608200 | -7.35584500 | -7.56601800  | C | 27.04011600 | 0.78391100  | -15.87573600 |
| C | 22.91058100 | -6.30344900 | -7.10218900  | C | 25.66057800 | 0.28408100  | -16.20849600 |
| O | 21.73765600 | -6.60471500 | -6.87049000  | C | 24.64898300 | 1.18008000  | -16.56653500 |
| C | 23.66534200 | -7.59988700 | -9.08479200  | C | 25.35227900 | -1.08057600 | -16.16087800 |
| C | 24.00988400 | -6.42011000 | -9.93338900  | C | 23.36279200 | 0.73404600  | -16.86208400 |
| C | 25.18037800 | -6.09936600 | -10.57341600 | C | 24.07150300 | -1.54761800 | -16.44981600 |
| N | 23.19724900 | -5.30658800 | -10.10619900 | C | 23.08281300 | -0.63046900 | -16.80297100 |
| C | 23.89529600 | -4.37201400 | -10.80833000 | O | 21.81171400 | -1.12340800 | -17.04872200 |
| N | 25.10023200 | -4.83034000 | -11.10857800 | H | 27.38684200 | 1.83814000  | -17.73793800 |
| H | 24.94590300 | -7.06578900 | -7.39954800  | H | 27.56912100 | 0.04726700  | -15.26750800 |
| H | 24.27742500 | -8.44420800 | -9.41487400  | H | 26.98343600 | 1.69811300  | -15.28178500 |
| H | 22.61640300 | -7.88613900 | -9.21801300  | H | 24.86060200 | 2.24544400  | -16.59062900 |
| H | 22.28253600 | -5.17213500 | -9.69621100  | H | 26.11385000 | -1.78703100 | -15.84157300 |
| H | 26.07335400 | -6.69353000 | -10.67145600 | H | 22.57859000 | 1.44471000  | -17.11396800 |
| H | 23.51081500 | -3.40025300 | -11.07765900 | H | 23.82010800 | -2.59774300 | -16.34449200 |
| N | 23.32713900 | -5.00660600 | -7.09572600  | H | 21.24734000 | -0.39588300 | -17.34271100 |
| C | 22.40694600 | -3.96407800 | -6.62792900  | N | 30.27026100 | 0.76398300  | -17.10393500 |
| C | 23.31551000 | -2.76693700 | -6.33936700  | C | 31.68299400 | 1.10902800  | -16.97998700 |
| C | 24.51474700 | -2.97912900 | -7.26995500  | C | 32.35338800 | 0.35972900  | -15.82628400 |
| C | 24.70845300 | -4.49882300 | -7.24494600  | C | 31.75945600 | 0.73862400  | -14.46749800 |
| H | 21.89816600 | -4.32398900 | -5.72701100  | C | 32.11063000 | 2.12510600  | -13.96655100 |
| H | 22.81094800 | -1.81908400 | -6.50876000  | O | 33.02916100 | 2.73937100  | -14.68434700 |
| H | 23.65041000 | -2.79475000 | -5.29691900  | O | 31.61814900 | 2.59918300  | -12.94088100 |
| H | 24.28074400 | -2.63831800 | -8.28378000  | H | 30.04308000 | -0.08868400 | -17.59145900 |
| H | 25.40807500 | -2.45183400 | -6.93346100  | H | 31.75761000 | 2.18867800  | -16.84891000 |
| H | 25.17521500 | -4.87499400 | -8.15604200  | H | 32.22198900 | -0.71910200 | -15.97831600 |
| H | 25.33078800 | -4.79076100 | -6.38956000  | H | 33.42820000 | 0.56334700  | -15.83877500 |
| C | 23.17494500 | 4.07094900  | -8.16501600  | H | 30.67135400 | 0.63197800  | -14.46362200 |
| C | 24.47154900 | 3.94032700  | -7.38539100  | H | 32.10529300 | 0.05096400  | -13.68835500 |
| O | 24.49572300 | 3.84711500  | -6.15748400  | C | 27.17119100 | -1.06459900 | -11.23463700 |
| H | 22.78354100 | 3.06528500  | -8.35229600  | O | 27.09989400 | -2.29020700 | -10.95703100 |
| H | 23.31410100 | 4.57064800  | -9.12578300  | O | 27.81734800 | -0.19257600 | -10.59415400 |
| N | 25.60430200 | 3.91098700  | -8.13889400  | C | 26.43262200 | -0.55675400 | -12.49043700 |
| C | 26.90921100 | 3.66696500  | -7.52203100  | C | 25.26363900 | -1.33370700 | -12.91651400 |
| C | 27.87906100 | 3.79328600  | -8.70150300  | O | 25.27656700 | -2.61666300 | -12.95265000 |
| C | 27.07244000 | 3.21286400  | -9.86760400  | C | 24.07437400 | -0.62980500 | -13.28936400 |
| C | 25.66101500 | 3.75414000  | -9.60839400  | C | 24.05000700 | 0.73945600  | -13.33825400 |
| H | 26.93940500 | 2.64916500  | -7.10742300  | C | 25.20001300 | 1.51746400  | -13.01731800 |
| H | 28.09956200 | 4.84863800  | -8.89310300  | C | 26.32596800 | 0.89028000  | -12.57512200 |
| H | 28.82164300 | 3.27178200  | -8.52997800  | H | 27.51452000 | -0.87447600 | -13.23270900 |
| H | 27.45044200 | 3.51102000  | -10.84541200 | H | 23.19331000 | -1.20790300 | -13.55042900 |
| H | 27.07247500 | 2.12023600  | -9.82247300  | H | 23.13525700 | 1.24034900  | -13.63167100 |
| H | 25.51940100 | 4.72382200  | -10.10216800 | H | 25.16282700 | 2.59740200  | -13.08354500 |
| H | 24.89233000 | 3.06427000  | -9.96383400  | H | 27.18383000 | 1.46961700  | -12.25637300 |
| C | 23.37401100 | 0.46299500  | -4.62997900  | O | 26.32040800 | -5.34016800 | -13.68533900 |
| C | 24.36836700 | 0.47276900  | -5.80915600  | H | 25.46406300 | -5.13220500 | -14.12277700 |
| C | 23.80429900 | 0.49888600  | -7.21754000  | H | 27.02302900 | -5.46624000 | -14.34448800 |
| C | 22.43646100 | 0.44725300  | -7.50698800  | O | 23.88932700 | -4.31013800 | -14.42149500 |
| C | 24.70154900 | 0.48618000  | -8.29997600  | H | 23.18252900 | -4.65464400 | -13.86138700 |
| C | 21.98156500 | 0.31811700  | -8.82448300  | H | 24.25288400 | -3.53625900 | -13.91266600 |
| C | 24.25389900 | 0.38956600  | -9.61510700  | O | 21.11272100 | -1.88069300 | -14.40624500 |
| C | 22.88539200 | 0.28578900  | -9.88672200  | H | 21.27411300 | -1.62288000 | -15.32977300 |
| H | 22.42255400 | -0.01492400 | -4.87688900  | H | 20.16169400 | -1.71082100 | -14.23316000 |
| H | 25.03195500 | 1.33676300  | -5.69512900  | C | 34.22903100 | 4.62592700  | -6.61620900  |
| H | 25.01416100 | -0.41197100 | -5.74814100  | C | 33.56854900 | 3.37125400  | -6.02230400  |
| H | 21.71145900 | 0.47435000  | -6.70117600  | C | 32.21255600 | 3.00593300  | -6.64240400  |
| H | 25.77021200 | 0.53138100  | -8.10570200  | C | 31.86913800 | 1.52585800  | -6.38986200  |
| H | 20.91588100 | 0.20050600  | -9.00872100  | N | 30.48973300 | 1.14701900  | -6.68816100  |
| H | 24.96889200 | 0.38857300  | -10.42743300 | C | 30.00941300 | 0.93858700  | -7.93729900  |
| H | 22.54258900 | 0.17863000  | -10.90949600 | N | 30.68494400 | 1.38910500  | -8.99180400  |
| C | 32.20595800 | -3.28008800 | -6.21799500  | N | 28.82189500 | 0.34648700  | -8.07988300  |
| C | 30.88106600 | -2.53175100 | -5.96499500  | H | 34.57270700 | 4.42156000  | -7.63781300  |
| C | 29.88630300 | -2.76302500 | -7.06586800  | H | 34.26093900 | 2.52751100  | -6.14510100  |
| C | 30.06229300 | -3.49344600 | -8.21527900  | H | 33.43875000 | 3.49628500  | -4.94021700  |
| N | 28.57397800 | -2.28066900 | -7.03477100  | H | 31.41652800 | 3.63785600  | -6.23300100  |
| C | 28.00318900 | -2.72424500 | -8.16173700  | H | 32.24260900 | 3.22260100  | -7.71792000  |
| N | 28.86337700 | -3.45130900 | -8.88983400  | H | 32.55724200 | 0.87822400  | -6.94968700  |
| H | 32.78876900 | -2.80276000 | -7.00523000  | H | 32.02569800 | 1.30206300  | -5.33146900  |
| H | 30.43748300 | -2.85447200 | -5.01432800  | H | 29.92994000 | 0.77015700  | -5.93711600  |
| H | 31.06796300 | -1.45476800 | -5.84395500  | H | 31.55230900 | 1.87445300  | -8.84585900  |
| H | 27.72491000 | -2.95961300 | -5.70201300  | H | 30.44703000 | 1.11003600  | -9.97699700  |

|    |             |             |              |
|----|-------------|-------------|--------------|
| H  | 28.58603300 | -0.38532600 | -7.39807300  |
| H  | 28.50186800 | 0.10720200  | -9.03370000  |
| C  | 31.09196500 | 7.81099400  | -10.77002400 |
| C  | 30.08598800 | 7.04887100  | -9.88787900  |
| C  | 28.76867000 | 6.83023800  | -10.57049400 |
| C  | 27.58229200 | 7.47370300  | -10.32118300 |
| C  | 28.51981900 | 5.91862800  | -11.66550600 |
| C  | 27.15424700 | 6.06956300  | -12.03583900 |
| C  | 29.30918000 | 4.97755300  | -12.35157200 |
| N  | 26.60662900 | 7.02205200  | -11.19684200 |
| C  | 26.57630900 | 5.32910500  | -13.07182100 |
| C  | 28.74041200 | 4.23795500  | -13.38209600 |
| C  | 27.38937500 | 4.42031900  | -13.74176900 |
| H  | 31.14602500 | 7.33678500  | -11.75643000 |
| H  | 30.51626500 | 6.07408500  | -9.62018700  |
| H  | 29.93291100 | 7.58532200  | -8.94422400  |
| H  | 27.34931900 | 8.22449000  | -9.57945800  |
| H  | 25.65229600 | 7.33978900  | -11.21793400 |
| H  | 30.35170800 | 4.81936300  | -12.09404600 |
| H  | 25.53902200 | 5.47200200  | -13.35464400 |
| H  | 29.33856800 | 3.52903400  | -13.94050900 |
| H  | 26.99036900 | 3.84890600  | -14.57320100 |
| O  | 30.25513200 | 0.66846100  | -11.51228200 |
| H  | 30.43876900 | 1.42349500  | -12.10503000 |
| H  | 29.31863000 | 0.40039300  | -11.56153800 |
| N  | 16.95122700 | -3.32633100 | -12.65670900 |
| C  | 16.59798200 | -4.44999200 | -11.75904500 |
| C  | 15.33356700 | -3.93569400 | -11.05287300 |
| C  | 14.68375900 | -3.01953400 | -12.10100800 |
| C  | 15.88661900 | -2.31389000 | -12.73438600 |
| H  | 17.41317800 | -4.64173900 | -11.05974000 |
| H  | 14.68509800 | -4.75148200 | -10.72525100 |
| H  | 15.61333300 | -3.35244100 | -10.16852700 |
| H  | 14.16227300 | -3.62000200 | -12.85449800 |
| H  | 13.96525100 | -2.31570600 | -11.67433000 |
| H  | 15.73292400 | -2.01237500 | -13.77303100 |
| H  | 16.18113800 | -1.41802000 | -12.17331800 |
| C  | 29.55100800 | -2.94399200 | -1.16203500  |
| C  | 28.26335700 | -3.75358000 | -1.34833600  |
| C  | 28.02826400 | -4.24398100 | -2.77774000  |
| C  | 27.84994200 | -3.14419600 | -3.81100900  |
| O  | 28.03343100 | -1.95476600 | -3.61555300  |
| O  | 27.50379400 | -3.64595600 | -5.00114500  |
| H  | 29.53841000 | -2.10850500 | -1.86598200  |
| H  | 28.25865400 | -4.62186400 | -0.67808100  |
| H  | 27.41403500 | -3.12694800 | -1.05084000  |
| H  | 28.87124900 | -4.85668000 | -3.12540400  |
| H  | 27.15128700 | -4.89924100 | -2.83545300  |
| H  | 30.46538400 | -3.51015100 | -1.36790800  |
| H  | 29.56605100 | -2.49726600 | -0.16238700  |
| C  | 34.86196500 | 8.00000800  | -10.31597000 |
| C  | 35.21485500 | 6.49740500  | -10.32800400 |
| C  | 34.95452800 | 5.87293100  | -11.66026700 |
| C  | 33.99933900 | 4.98930500  | -12.10264600 |
| N  | 35.67278100 | 6.21026600  | -12.79837800 |
| C  | 35.14412800 | 5.53378800  | -13.85483400 |
| N  | 34.13054600 | 4.78943000  | -13.46209900 |
| H  | 35.57009700 | 8.58822700  | -10.90862000 |
| H  | 36.25684300 | 6.33964500  | -10.02062400 |
| H  | 34.59547900 | 5.97425600  | -9.59278500  |
| H  | 36.44888300 | 6.85359800  | -12.83525000 |
| H  | 33.22728700 | 4.47930900  | -11.54568300 |
| H  | 35.52589400 | 5.61016600  | -14.86215600 |
| H  | 33.34367700 | 3.59984100  | -14.23026500 |
| H  | 34.87102100 | 8.38159500  | -9.28968300  |
| H  | 33.87105900 | 8.09548200  | -10.77200900 |
| Mg | 26.76277300 | -3.89142500 | -12.19994400 |

### Int-AMg (9.4 kcal/mol)

|   |             |             |              |
|---|-------------|-------------|--------------|
| H | 20.66699000 | -6.80399800 | -16.56500000 |
| H | 16.39000600 | -5.37401100 | -12.30898300 |
| H | 24.65800000 | -6.75700500 | -19.16500000 |
| H | 29.36500100 | -8.34200500 | -18.17999400 |
| H | 35.11212100 | 4.86988000  | -6.01613000  |
| H | 32.10201300 | 7.76385100  | -10.35105000 |
| H | 33.92499700 | -0.03001000 | -10.21099300 |
| H | 31.95004800 | -4.27895700 | -6.58614700  |
| H | 23.18500600 | 1.49700800  | -4.32302200  |
| H | 22.41702500 | 4.62903800  | -7.60400300  |
| H | 22.25399800 | 6.38997600  | -15.14806100 |
| H | 33.53403100 | 5.46901900  | -6.68109200  |
| H | 30.78102700 | 8.84800600  | -10.93701100 |
| H | 23.93695900 | 6.31001800  | -15.82103000 |
| H | 32.80798800 | -0.12301500 | -3.81400500  |
| H | 32.79714900 | -3.33873500 | -5.29807900  |
| H | 32.07465800 | 0.82262800  | -17.96202800 |
| H | 30.43538700 | -3.27780600 | -15.73600400 |
| H | 31.70210100 | -4.16470700 | -14.93609200 |
| H | 30.41806600 | -9.05985600 | -14.20510600 |
| H | 20.88601500 | -5.04999900 | -16.84099800 |
| H | 34.15695900 | -4.71599500 | -10.10795500 |
| H | 23.72501000 | -8.30800900 | -7.05601400  |
| H | 21.59204000 | -3.72900200 | -7.32004900  |
| H | 27.89794800 | 0.15108100  | -17.74212300 |
| H | 27.15884300 | 4.34404500  | -6.69899000  |
| C | 29.55193700 | -8.45618800 | -13.91485300 |
| C | 29.02371700 | -7.66163000 | -15.09897100 |
| O | 28.70756300 | -6.46713400 | -15.06399300 |

|   |             |             |              |
|---|-------------|-------------|--------------|
| C | 29.81345700 | -7.55646500 | -12.70277000 |
| C | 28.49965400 | -7.13183100 | -12.01959700 |
| C | 28.75953000 | -6.01563400 | -11.00998300 |
| O | 29.46776800 | -6.28595100 | -10.02456400 |
| O | 28.25565900 | -4.85464000 | -11.24704500 |
| H | 28.77649800 | -9.19232700 | -13.65280000 |
| H | 30.44756000 | -8.06681000 | -11.97327900 |
| H | 30.35631400 | -6.66564700 | -13.03534100 |
| H | 27.76586300 | -6.81330500 | -12.75655500 |
| H | 28.09773800 | -7.99672800 | -11.47657600 |
| N | 28.95086700 | -8.37322300 | -16.24065400 |
| C | 28.68997800 | -7.77099700 | -17.53402000 |
| C | 27.22876900 | -7.97996500 | -17.93660300 |
| O | 26.76233100 | -9.10807000 | -18.03524800 |
| H | 29.12939700 | -9.36545100 | -16.21944300 |
| H | 28.99395200 | -6.72395100 | -17.49527700 |
| N | 26.51374600 | -6.83625200 | -18.10960600 |
| C | 25.05601700 | -6.83998600 | -18.14799800 |
| C | 24.49896000 | -5.70578200 | -17.29450100 |
| H | 26.96394400 | -5.96455500 | -17.86870400 |
| H | 24.73516200 | -7.81524400 | -17.77140300 |
| H | 23.40899500 | -5.68126500 | -17.35487400 |
| H | 24.77145700 | -5.81838400 | -16.24423700 |
| H | 24.86389700 | -4.72971300 | -17.63723700 |
| C | 23.25809000 | 6.03494500  | -15.04087400 |
| C | 23.25610700 | 4.48969000  | -15.01159300 |
| C | 22.38186000 | 3.86090700  | -13.95498200 |
| C | 22.69663000 | 3.97927900  | -12.59547200 |
| C | 21.25704600 | 3.09946000  | -14.29845000 |
| C | 21.93500600 | 3.34669100  | -11.61838800 |
| C | 20.47880400 | 2.46098200  | -13.33389000 |
| C | 20.82204900 | 2.58206200  | -11.98494700 |
| O | 20.05075000 | 1.93476600  | -11.06327300 |
| H | 23.64605300 | 6.43875000  | -14.09887800 |
| H | 22.93855400 | 4.12522300  | -15.99595400 |
| H | 24.28818200 | 4.13712500  | -14.88249700 |
| H | 23.57047200 | 4.54989600  | -12.29162800 |
| H | 20.99328700 | 2.99030700  | -15.34754400 |
| H | 22.21308800 | 3.42334400  | -10.57425200 |
| H | 19.62112400 | 1.85528500  | -13.60660200 |
| H | 20.48291000 | 2.00332700  | -10.19960800 |
| C | 20.86198400 | -5.83999400 | -16.08300500 |
| C | 19.83763900 | -5.62969200 | -14.97781800 |
| O | 19.04149800 | -6.50551800 | -14.65267500 |
| H | 21.86209500 | -5.86012100 | -15.63665100 |
| N | 19.91883300 | -4.42664100 | -14.33064200 |
| C | 19.19503600 | -4.19797700 | -13.09497000 |
| C | 18.15163900 | -3.09139100 | -13.22220100 |
| O | 18.39836700 | -2.01779900 | -13.79914400 |
| C | 20.22461700 | -3.87135600 | -11.98667000 |
| O | 19.63776800 | -3.64940300 | -10.70877000 |
| H | 20.59786300 | -3.71126200 | -14.59129300 |
| H | 18.70509000 | -5.14305100 | -12.86159000 |
| H | 20.88111400 | -4.74165400 | -11.88646600 |
| H | 20.83589300 | -3.01921700 | -12.30422100 |
| H | 19.35796200 | -2.72616400 | -10.66659200 |
| C | 23.90599800 | -7.35587100 | -7.56603100  |
| C | 22.89812900 | -6.30450100 | -7.12680100  |
| O | 21.71848000 | -6.60003700 | -6.92730000  |
| C | 23.75132300 | -7.58082400 | -9.09954000  |
| C | 24.12600500 | -6.39462500 | -9.93475600  |
| C | 25.28540300 | -6.09003900 | -10.60805600 |
| N | 23.32159000 | -5.27471400 | -10.10407200 |
| C | 24.01351500 | -4.35405400 | -10.83027600 |
| N | 25.20674800 | -4.82545000 | -11.15989500 |
| H | 24.93551600 | -7.05880500 | -7.35050000  |
| H | 24.38647500 | -8.41770500 | -9.40384300  |
| H | 22.71371200 | -7.87442700 | -9.29498300  |
| H | 22.42160600 | -5.12479600 | -9.66805000  |
| H | 26.16649900 | -6.69910200 | -10.72255100 |
| H | 23.62993900 | -3.38009700 | -11.09215300 |
| N | 23.32462200 | -5.00967500 | -7.09663600  |
| C | 22.40696900 | -3.96405800 | -6.62794500  |
| C | 23.31436900 | -2.76247300 | -6.34652700  |
| C | 24.53188000 | -2.99267400 | -7.24964800  |
| C | 24.71359600 | -4.51279200 | -7.20756900  |
| H | 21.89935900 | -4.31991500 | -5.72459300  |
| H | 22.81388400 | -1.81747800 | -6.54560900  |
| H | 23.62891700 | -2.76731700 | -5.29759100  |
| H | 24.32304800 | -2.65912200 | -8.27141300  |
| H | 25.42261200 | -2.46965000 | -6.89906400  |
| H | 25.20473700 | -4.89880900 | -8.10158500  |
| H | 25.30900800 | -4.80283500 | -6.33245000  |
| C | 23.17494100 | 4.07095200  | -8.16501500  |
| C | 24.47013000 | 3.93449800  | -7.38410200  |
| O | 24.49210900 | 3.83148700  | -6.15672600  |
| H | 22.78155000 | 3.06847700  | -8.36169600  |
| H | 23.32002700 | 4.57821400  | -9.12099800  |
| N | 25.60302700 | 3.91251800  | -8.13678900  |
| C | 26.90921300 | 3.66696500  | -7.52203100  |
| C | 27.87691100 | 3.80653800  | -8.70191100  |
| C | 27.07240400 | 3.23823500  | -9.87506500  |
| C | 25.66014800 | 3.77368600  | -9.60855700  |
| H | 26.94219000 | 2.64725200  | -7.11308000  |
| H | 28.09799900 | 4.86422500  | -8.88017500  |
| H | 28.81999500 | 3.28469700  | -8.53420500  |
| H | 27.45399900 | 3.54475500  | -10.84831200 |
| H | 27.06535700 | 2.14686500  | -9.84652500  |
| H | 25.51197700 | 4.74932300  | -10.08961600 |



|   |             |             |              |    |             |             |              |
|---|-------------|-------------|--------------|----|-------------|-------------|--------------|
| H | 24.89310500 | 3.08457800  | -9.97000500  | H  | 27.12002800 | 1.50127300  | -12.32417500 |
| C | 23.37401200 | 0.46299700  | -4.62997000  | O  | 26.43625500 | -5.22268500 | -13.77388500 |
| C | 24.31880100 | 0.47151300  | -5.84295200  | H  | 25.55576000 | -5.09692400 | -14.18981800 |
| C | 23.67496200 | 0.52293200  | -7.21625000  | H  | 27.12183100 | -5.43324500 | -14.42984900 |
| C | 22.29061600 | 0.53952800  | -7.42560000  | O  | 23.85980100 | -4.46987100 | -14.33287400 |
| C | 24.50573000 | 0.47753400  | -8.34813000  | H  | 23.35736100 | -4.93820400 | -13.65381800 |
| C | 21.75295500 | 0.44601600  | -8.71481000  | H  | 24.15010500 | -3.63807100 | -13.88524900 |
| C | 23.97614500 | 0.41364500  | -9.63341800  | O  | 21.10098300 | -1.85832600 | -14.34103200 |
| C | 22.59221100 | 0.37627400  | -9.82713900  | H  | 21.28460000 | -1.63857300 | -15.27008500 |
| H | 22.41501000 | -0.01374600 | -4.85183600  | H  | 20.13815400 | -1.71861400 | -14.20469200 |
| H | 24.99572600 | 1.32807400  | -5.75373000  | C  | 34.22881200 | 4.62612600  | -6.61576500  |
| H | 24.95612200 | -0.42049800 | -5.82360000  | C  | 33.56754000 | 3.32874800  | -6.13161800  |
| H | 21.61515700 | 0.59763900  | -6.57985100  | C  | 32.29939400 | 2.93665400  | -6.91076400  |
| H | 25.58494400 | 0.46560600  | -8.22777700  | C  | 31.95743200 | 1.44213800  | -6.72479800  |
| H | 20.67310100 | 0.38978100  | -8.83703900  | N  | 30.54958500 | 1.09848900  | -6.91023000  |
| H | 24.64959000 | 0.38989800  | -10.47729800 | C  | 29.92843600 | 0.90455300  | -8.09746400  |
| H | 22.18474400 | 0.28863600  | -10.82794000 | N  | 30.49289200 | 1.32370600  | -9.22980200  |
| C | 32.20577300 | -3.28035300 | -6.21775400  | N  | 28.72560800 | 0.33370900  | -8.09424700  |
| C | 30.87853400 | -2.53566800 | -5.96394400  | H  | 34.59742300 | 4.47214100  | -7.63973400  |
| C | 29.89589200 | -2.74423100 | -7.08039900  | H  | 34.30374800 | 2.51786100  | -6.21329500  |
| C | 30.10323400 | -3.40693200 | -8.26464500  | H  | 33.31613100 | 3.40133000  | -5.06617500  |
| N | 28.56583900 | -2.31645300 | -7.03087800  | H  | 31.44911200 | 3.54411700  | -6.58125400  |
| C | 28.01334300 | -2.72675600 | -8.17858500  | H  | 32.44692300 | 3.16405800  | -7.97600400  |
| N | 28.90487600 | -3.37821100 | -8.94216600  | H  | 32.57438400 | 0.81882500  | -7.38403800  |
| H | 32.78929700 | -2.80050600 | -7.00292600  | H  | 32.20300700 | 1.14633800  | -5.70136200  |
| H | 30.42369000 | -2.87904600 | -5.02635200  | H  | 30.03660400 | 0.77910300  | -6.10185700  |
| H | 31.06513000 | -1.46152500 | -5.81679100  | H  | 31.28877500 | 1.93782700  | -9.18597300  |
| H | 27.74873200 | -3.01570400 | -5.70201500  | H  | 30.06595300 | 1.16078100  | -10.17314600 |
| H | 30.97374300 | -3.90999300 | -8.64974100  | H  | 28.54959800 | -0.39100000 | -7.39032700  |
| H | 27.00672800 | -2.53251000 | -8.50729900  | H  | 28.23834700 | 0.14721000  | -8.98663600  |
| H | 28.69317600 | -3.84804600 | -9.83638400  | C  | 31.09195300 | 7.81107100  | -10.76997700 |
| C | 33.48008900 | -4.18194800 | -10.78309600 | C  | 30.08120500 | 7.04051000  | -9.90149800  |
| C | 33.36831700 | -2.73930600 | -10.31694500 | C  | 28.77652500 | 6.80976200  | -10.60472800 |
| O | 33.14601200 | -2.39774500 | -9.16052200  | C  | 27.57906700 | 7.43678700  | -10.36702100 |
| C | 32.15729100 | -4.96105200 | -10.77547300 | C  | 28.55350100 | 5.90152500  | -11.70850800 |
| O | 31.98894700 | -5.56248900 | -9.51558400  | C  | 27.19042300 | 6.03614600  | -12.09405200 |
| H | 33.91821100 | -4.21228200 | -11.78730200 | C  | 29.36347000 | 4.97553100  | -12.39156900 |
| H | 31.31695100 | -4.29177700 | -11.01384500 | N  | 26.62041700 | 6.97772300  | -11.25732700 |
| H | 32.19441000 | -5.71741000 | -11.57694200 | C  | 26.63392000 | 5.29204100  | -13.13907400 |
| H | 31.07680500 | -5.92690600 | -9.52018600  | C  | 28.81668200 | 4.23501100  | -13.43262300 |
| N | 33.54452300 | -1.80525000 | -11.30025500 | C  | 27.46715500 | 4.39887100  | -13.80552400 |
| C | 33.30499300 | -0.40202700 | -11.03299600 | H  | 31.15154800 | 7.34229000  | -11.75894400 |
| H | 33.57361100 | -2.11125000 | -12.26015800 | H  | 30.51652600 | 6.06966700  | -9.62751900  |
| H | 33.55507600 | 0.17604000  | -11.92477500 | H  | 29.90876500 | 7.57486900  | -8.96004400  |
| H | 32.25616900 | -0.20712200 | -10.78087800 | H  | 27.32729300 | 8.18009100  | -9.62391500  |
| C | 30.70337000 | -3.79247300 | -14.83686200 | H  | 25.66219100 | 7.28253000  | -11.28779900 |
| C | 30.56240000 | -2.85370100 | -13.62973400 | H  | 30.40473200 | 4.83071800  | -12.12000200 |
| C | 29.18957900 | -2.18336700 | -13.58394100 | H  | 25.59733300 | 5.42192000  | -13.43189800 |
| O | 28.17394400 | -2.94756700 | -13.62453700 | H  | 29.42817400 | 3.53481600  | -13.98793300 |
| O | 29.12742000 | -0.92537500 | -13.53823600 | H  | 27.08764800 | 3.82904000  | -14.64704600 |
| H | 30.02282400 | -4.63933300 | -14.73511300 | O  | 29.65937600 | 1.15489600  | -11.78025000 |
| H | 30.66948800 | -3.42872100 | -12.70442200 | H  | 30.34693700 | 1.67984300  | -12.23662600 |
| H | 31.33151900 | -2.07590000 | -13.63347300 | H  | 29.52387000 | 0.34630300  | -12.31613100 |
| C | 27.87495800 | 1.06284000  | -17.13691900 | N  | 16.94949500 | -3.32850700 | -12.66026300 |
| C | 29.24872400 | 1.61608400  | -16.81297600 | C  | 16.59798200 | -4.44999400 | -11.75904200 |
| O | 29.41018300 | 2.73198400  | -16.32241700 | C  | 15.33360900 | -3.93482700 | -11.05380500 |
| C | 27.12121100 | 0.75955100  | -15.82267000 | C  | 14.68130800 | -3.02402400 | -12.10502700 |
| C | 25.73387500 | 0.24190900  | -16.09142600 | C  | 15.88231000 | -2.31909200 | -12.74280600 |
| C | 24.70625000 | 1.12867300  | -16.43041100 | H  | 17.41376900 | -4.63880700 | -11.06000100 |
| C | 25.44130700 | -1.12647300 | -16.04221400 | H  | 14.68670900 | -4.75024700 | -10.72217500 |
| C | 23.42543000 | 0.66969600  | -16.72583300 | H  | 15.61363900 | -3.34764300 | -10.17214500 |
| C | 24.16388600 | -1.60541100 | -16.33468200 | H  | 14.15994300 | -3.62845400 | -12.85542800 |
| C | 23.16563300 | -0.69980900 | -16.68936800 | H  | 13.96217700 | -2.31945700 | -11.68060900 |
| O | 21.90600500 | -1.20677400 | -16.96450600 | H  | 15.72737200 | -2.02340100 | -13.78293100 |
| H | 27.33263800 | 1.82445300  | -17.70578900 | H  | 16.17509400 | -1.41960100 | -12.18663600 |
| H | 27.69850300 | 0.03648400  | -15.23823300 | C  | 29.55108800 | -2.94420200 | -1.16180300  |
| H | 27.07725600 | 1.67464500  | -15.22720100 | C  | 28.26727700 | -3.76305400 | -1.33812400  |
| H | 24.90626500 | 2.19632000  | -16.45182100 | C  | 28.03628800 | -4.27502500 | -2.76034600  |
| H | 26.21616300 | -1.82359000 | -15.73377400 | C  | 27.84747200 | -3.18755100 | -3.80492800  |
| H | 22.63122100 | 1.37250800  | -16.96794500 | O  | 27.98993600 | -1.99267700 | -3.61031900  |
| H | 23.92459800 | -2.66073800 | -16.25608300 | O  | 27.54119000 | -3.70610500 | -4.99871300  |
| H | 21.34830500 | -0.48974900 | -17.29489100 | H  | 29.53189300 | -2.11149500 | -1.86880400  |
| N | 30.27096800 | 0.76211000  | -17.07194300 | H  | 28.26770100 | -4.62154400 | -0.65528400  |
| C | 31.68351800 | 1.10951500  | -16.97993400 | H  | 27.41444700 | -3.13677700 | -1.05047400  |
| C | 32.38413300 | 0.35668000  | -15.84645500 | H  | 28.88335600 | -4.88608000 | -3.10036700  |
| C | 31.84264900 | 0.74033200  | -14.46942700 | H  | 27.16378100 | -4.93731100 | -2.80895200  |
| C | 32.26524700 | 2.09925300  | -13.95121700 | H  | 30.46537700 | -3.51011500 | -1.36803900  |
| O | 33.15506600 | 2.71436000  | -14.70020100 | H  | 29.56598300 | -2.49711300 | -0.16245500  |
| O | 31.84182500 | 2.55234600  | -12.88354100 | C  | 34.86214800 | 7.99988800  | -10.31617100 |
| H | 30.04109400 | -0.13942700 | -17.46093700 | C  | 35.22577700 | 6.50064800  | -10.32532100 |
| H | 31.75441000 | 2.18953400  | -16.85009100 | C  | 35.00860200 | 5.87385600  | -11.66401200 |
| H | 32.23490700 | -0.72078700 | -15.99178700 | C  | 34.09593800 | 4.95539700  | -12.12379100 |
| H | 33.46027000 | 0.54658600  | -15.89885700 | N  | 35.73968700 | 6.23355800  | -12.78729300 |
| H | 30.75160200 | 0.67185800  | -14.44612500 | C  | 35.25929500 | 5.53600900  | -13.85283700 |
| H | 32.17412800 | 0.01944900  | -13.71396500 | N  | 34.26499400 | 4.75646500  | -13.47932000 |
| C | 26.87518300 | -1.03000800 | -11.08997000 | H  | 35.56869300 | 8.59205500  | -10.90718000 |
| O | 26.98737400 | -2.27556200 | -10.95244800 | H  | 36.26093800 | 6.35209700  | -9.99092000  |
| O | 27.14942400 | -0.14356000 | -10.26162100 | H  | 34.59272700 | 5.97007400  | -9.60726500  |
| C | 26.33355300 | -0.53199400 | -12.49504400 | H  | 36.49260100 | 6.90451000  | -12.80959200 |
| C | 25.13144000 | -1.31587100 | -12.90648400 | H  | 33.32982600 | 4.41794100  | -11.58496700 |
| O | 25.20088800 | -2.57764000 | -12.99745500 | H  | 35.65897300 | 5.62474300  | -14.85214500 |
| C | 23.91106700 | -0.61300800 | -13.18103600 | H  | 33.49823400 | 3.56726000  | -14.24614100 |
| C | 23.89957900 | 0.75323700  | -13.19989600 | H  | 34.87088400 | 8.38158600  | -9.28967800  |
| C | 25.06783800 | 1.54641400  | -12.91564600 | H  | 33.87099200 | 8.09565600  | -10.77183000 |
| C | 26.22280900 | 0.94080300  | -12.56386700 | Mg | 26.87594800 | -3.80079300 | -12.30284000 |
| H | 27.19124000 | -0.83259700 | -13.13224700 |    |             |             |              |
| H | 23.02058700 | -1.18132500 | -13.43179100 |    |             |             |              |
| H | 22.97572300 | 1.26288200  | -13.44783400 |    |             |             |              |
| H | 25.00353100 | 2.62551500  | -12.97461600 |    |             |             |              |

### TS2-A<sub>Mg</sub> (15.8 kcal/mol)

|   |             |             |              |
|---|-------------|-------------|--------------|
| H | 20.66699100 | -6.80399800 | -16.56500000 |
|---|-------------|-------------|--------------|

|   |             |             |              |   |             |             |              |
|---|-------------|-------------|--------------|---|-------------|-------------|--------------|
| H | 16.39000400 | -5.37400900 | -12.30898500 | N | 23.32288900 | -5.00614000 | -7.10672900  |
| H | 24.65800000 | -6.75700600 | -19.16500000 | C | 22.40694500 | -3.96405500 | -6.62793800  |
| H | 29.36499900 | -8.34200700 | -18.17999400 | C | 23.31287500 | -2.76092300 | -6.35631200  |
| H | 35.11211300 | 4.86985600  | -6.01610800  | C | 24.50870000 | -2.97926500 | -7.29030600  |
| H | 32.10201300 | 7.76385400  | -10.35104800 | C | 24.70340400 | -4.49915100 | -7.25989500  |
| H | 33.92499600 | -0.03000800 | -10.21099700 | H | 21.90517300 | -4.32239300 | -5.72294000  |
| H | 31.95004300 | -4.27895500 | -6.58614800  | H | 22.80414900 | -1.81633800 | -6.53604500  |
| H | 23.18503300 | 1.49701000  | -4.32301200  | H | 23.65300800 | -2.77360900 | -5.31537300  |
| H | 22.41700800 | 4.62904500  | -7.60403400  | H | 24.27266100 | -2.64255500 | -8.30525200  |
| H | 22.25399600 | 6.38997200  | -15.14805300 | H | 25.40098400 | -2.44881200 | -6.95521000  |
| H | 33.53404900 | 5.46903500  | -6.68108300  | H | 25.16855300 | -4.87939500 | -8.17066000  |
| H | 30.78102900 | 8.84800600  | -10.93701400 | H | 25.32766800 | -4.78787600 | -6.40448000  |
| H | 23.93695300 | 6.31000100  | -15.82104100 | C | 23.17501400 | 4.07090900  | -8.16503000  |
| H | 23.80795700 | -0.12305000 | -3.81401300  | C | 24.46929700 | 3.93234500  | -7.38329700  |
| H | 32.79714600 | -3.33874400 | -5.29807800  | O | 24.49228500 | 3.82517700  | -6.15626100  |
| H | 32.07466400 | 0.82262900  | -17.96202600 | H | 22.78118400 | 3.06975800  | -8.36604700  |
| H | 30.43538200 | -3.27781000 | -15.73600500 | H | 23.32246600 | 4.58127400  | -9.11881600  |
| H | 31.70211300 | -4.16467800 | -14.93607800 | N | 25.60250700 | 3.91393300  | -8.13599000  |
| H | 30.41806800 | -9.05985800 | -14.20509600 | C | 26.90925100 | 3.66688600  | -7.52199100  |
| H | 20.88601500 | -5.05000000 | -16.84099900 | C | 27.87537300 | 3.79697800  | -8.70485800  |
| H | 34.15695700 | -4.71599300 | -10.10795100 | C | 27.06390800 | 3.22804700  | -9.87327900  |
| H | 23.72500700 | -8.30801600 | -7.05602800  | C | 25.65862300 | 3.77935300  | -9.60815300  |
| H | 21.59205100 | -3.72899900 | -7.32006100  | H | 26.93925000 | 2.64857500  | -7.10908800  |
| H | 27.89794000 | 0.15107800  | -17.74211900 | H | 28.09988700 | 4.85260300  | -8.89046900  |
| H | 27.15884100 | 4.34406100  | -6.69900200  | H | 28.81734200 | 3.27230000  | -8.53911200  |
| C | 29.55192400 | -8.45615300 | -13.91485100 | H | 27.44691900 | 3.51530500  | -10.85122800 |
| C | 29.03322900 | -7.65926800 | -15.10182800 | H | 27.04331700 | 2.13765400  | -9.83119900  |
| O | 28.73968600 | -6.45928700 | -15.07111600 | H | 25.52565900 | 4.75816400  | -10.08643000 |
| C | 29.79766000 | -7.55876800 | -12.69645500 | H | 24.88372400 | 3.10219000  | -9.97417100  |
| C | 28.47241200 | -7.12767800 | -12.03983100 | C | 23.37400900 | 0.46304100  | -4.62999800  |
| C | 28.69567500 | -6.02574200 | -11.00527100 | C | 24.31257000 | 0.47105100  | -5.84647700  |
| O | 29.46404200 | -6.26848400 | -10.05752400 | C | 23.66081800 | 0.53572000  | -7.21570500  |
| O | 28.08024900 | -4.90623200 | -11.16483100 | C | 22.27623700 | 0.54789100  | -7.42004700  |
| H | 28.77441900 | -9.19390700 | -13.66313300 | C | 24.48790300 | 0.50969500  | -8.35085900  |
| H | 30.41512000 | -8.07329200 | -11.95588700 | C | 21.73614400 | 0.47164300  | -8.70968800  |
| H | 30.35138000 | -6.67070900 | -13.01768800 | C | 23.95760500 | 0.45766900  | -9.63680400  |
| H | 27.75625000 | -6.80074800 | -12.79023200 | C | 22.57226800 | 0.41931100  | -9.82455300  |
| H | 28.04816600 | -7.99541000 | -11.51701900 | H | 22.41401500 | -0.01319600 | -4.84885800  |
| N | 28.94227300 | -8.37504800 | -16.23986400 | H | 24.99640900 | 1.32196200  | -5.75616500  |
| C | 28.68998000 | -7.77099700 | -17.53402000 | H | 24.94254300 | -0.42651400 | -5.83498300  |
| C | 27.23045600 | -7.97773700 | -17.94307700 | H | 21.60282600 | 0.59240200  | -6.57184800  |
| O | 26.76665800 | -9.10628300 | -18.05175200 | H | 25.56625600 | 0.50774000  | -8.22272800  |
| H | 29.09815300 | -9.37108100 | -16.21615000 | H | 20.65619000 | 0.41802200  | -8.83142700  |
| H | 28.99601100 | -6.72484800 | -17.49112700 | H | 24.61722700 | 0.44476900  | -10.49360700 |
| N | 26.51386400 | -6.83430900 | -18.10824400 | H | 22.16452600 | 0.34574900  | -10.82594900 |
| C | 25.05601700 | -6.83998500 | -18.14799800 | C | 32.20578900 | -3.28034500 | -6.21774900  |
| C | 24.49575400 | -5.71173700 | -17.29207000 | C | 30.88525900 | -2.52290600 | -5.97811300  |
| H | 26.96231300 | -5.96321100 | -17.86194400 | C | 29.89664100 | -2.74011200 | -7.08866400  |
| H | 24.73711700 | -7.81717200 | -17.77445400 | C | 30.07615600 | -3.44121600 | -8.25653700  |
| H | 23.40638000 | -5.68424200 | -17.35945500 | N | 28.57291700 | -2.29615800 | -7.02940900  |
| H | 24.75999900 | -5.83292600 | -16.24189500 | C | 27.99458500 | -2.74364200 | -8.14897900  |
| H | 24.86382500 | -4.73271000 | -17.62229000 | N | 28.86376300 | -3.42760700 | -8.91103900  |
| C | 23.25807600 | 6.03493500  | -15.04084600 | H | 32.79587800 | -2.80865900 | -7.00344500  |
| C | 23.25118400 | 4.49007200  | -14.99622500 | H | 30.42455300 | -2.84719400 | -5.03667500  |
| C | 22.36480300 | 3.87829400  | -13.93918500 | H | 31.08134300 | -1.44928600 | -5.84835500  |
| C | 22.67021000 | 4.01106300  | -12.57914300 | H | 27.73933700 | -3.00454400 | -5.69380800  |
| C | 21.23571600 | 3.12317400  | -14.28068000 | H | 30.93493000 | -3.96352000 | -8.64435000  |
| C | 21.89521700 | 3.39863300  | -11.59994600 | H | 26.96811200 | -2.58765300 | -8.43163200  |
| C | 20.44497100 | 2.50325400  | -13.31425100 | H | 28.62585300 | -3.93546400 | -9.78135100  |
| C | 20.78051900 | 2.63676600  | -11.96487400 | C | 33.48009300 | -4.18194300 | -10.78309800 |
| O | 20.00050700 | 2.00286000  | -11.03934900 | C | 33.37143600 | -2.73871800 | -10.31582900 |
| H | 23.64539500 | 6.44518700  | -14.10102000 | O | 33.15197800 | -2.39790700 | -9.15864500  |
| H | 22.93920700 | 4.11666600  | -15.97880500 | C | 32.15396300 | -4.95685400 | -10.77955000 |
| H | 24.27887000 | 4.13117400  | -14.85348400 | O | 31.98561300 | -5.57178700 | -9.52491800  |
| H | 23.54697000 | 4.57766100  | -12.27628000 | H | 33.92000100 | -4.21150900 | -11.78643500 |
| H | 20.97832200 | 3.00342100  | -15.33012100 | H | 31.31288400 | -4.28436900 | -11.00771900 |
| H | 22.16618300 | 3.48564500  | -10.55483400 | H | 32.18667000 | -5.70602200 | -11.58734400 |
| H | 19.58460700 | 1.90089900  | -13.58604200 | H | 31.08041200 | -5.95120700 | -9.54419100  |
| H | 20.43178700 | 2.07540900  | -10.17590700 | N | 33.55347300 | -1.80466200 | -11.29912800 |
| C | 20.86198600 | -5.83999400 | -16.08300500 | C | 33.30499600 | -0.40202500 | -11.03299900 |
| C | 19.84674200 | -5.63756200 | -14.96768500 | H | 33.54601100 | -2.11252400 | -12.25908900 |
| O | 19.08372700 | -6.53282700 | -14.61564100 | H | 33.55330700 | 0.17669600  | -11.92505500 |
| H | 21.86514100 | -5.86595000 | -15.64364900 | C | 32.25368300 | -0.21609600 | -10.78456600 |
| N | 19.90240800 | -4.42265600 | -14.34210600 | C | 30.70332100 | -3.79246800 | -14.83683200 |
| C | 19.19503900 | -4.19797700 | -13.09497400 | C | 30.69985000 | -2.83937000 | -13.63933300 |
| C | 18.15227600 | -3.08863400 | -13.21345100 | C | 29.34157200 | -2.42167400 | -13.07758200 |
| O | 18.39776900 | -2.01120800 | -13.78269100 | O | 28.32909600 | -3.11328500 | -13.41833800 |
| C | 20.24114800 | -3.87510600 | -12.00246800 | O | 29.31948800 | -1.44998500 | -12.28282100 |
| O | 19.67786200 | -3.68541200 | -10.70754500 | H | 30.01354300 | -4.62240300 | -14.68616900 |
| H | 20.55266400 | -3.68710300 | -14.62738100 | H | 31.21723200 | -3.30737200 | -12.79378700 |
| H | 18.70899700 | -5.14375100 | -12.85681100 | H | 31.26600600 | -1.92793400 | -13.85636000 |
| H | 20.91078200 | -4.73799600 | -11.93261000 | C | 27.87496000 | 1.06283700  | -17.13692000 |
| H | 20.83448200 | -3.00887000 | -12.31608300 | C | 29.24617900 | 1.58702900  | -16.76667900 |
| H | 19.40038200 | -2.76332000 | -10.63648200 | O | 29.40989100 | 2.65299300  | -16.17568400 |
| C | 23.90602700 | -7.35581500 | -7.56603400  | C | 27.07267500 | 0.76350400  | -15.85369900 |
| C | 22.91011600 | -6.30616800 | -7.09752500  | C | 25.66333700 | 0.32353000  | -16.14755200 |
| O | 21.74364800 | -6.60996700 | -6.84249900  | C | 24.68066800 | 1.27009600  | -16.45254500 |
| C | 23.69230700 | -7.58132300 | -9.09360100  | C | 25.30112800 | -1.02824200 | -16.13151700 |
| C | 24.04916700 | -6.40968800 | -9.95664900  | C | 23.37347800 | 0.88460200  | -16.73693400 |
| C | 25.19515900 | -6.13325400 | -10.66256300 | C | 23.99741800 | -1.43494200 | -16.40808400 |
| N | 23.24793500 | -5.28889700 | -10.14224300 | C | 23.04084900 | -0.46916000 | -16.71479900 |
| C | 23.92807500 | -4.39737800 | -10.91570100 | O | 21.74884900 | -0.90387100 | -16.95842500 |
| N | 25.11197000 | -4.88651700 | -11.25050900 | H | 27.36258000 | 1.83645900  | -17.71778500 |
| H | 24.94340600 | -7.06479000 | -7.38289100  | H | 27.59059400 | -0.01302400 | -15.28211700 |
| H | 24.30493200 | -8.42815300 | -9.41643200  | H | 27.06777300 | 1.65731800  | -15.22683100 |
| H | 22.64498400 | -7.86517400 | -9.24670900  | H | 24.93473600 | 2.32619300  | -16.45062300 |
| H | 22.34984700 | -5.12451500 | -9.70747500  | H | 26.03834300 | -1.77391500 | -15.84830700 |
| H | 26.07158700 | -6.74912100 | -10.77534100 | H | 22.61376800 | 1.63274500  | -16.95165200 |
| H | 23.55021300 | -3.42849400 | -11.20541000 | H | 23.70836200 | -2.47794200 | -16.33106800 |

|   |             |             |              |
|---|-------------|-------------|--------------|
| H | 21.19686600 | -0.13826200 | -17.16625600 |
| N | 30.27052400 | 0.76321900  | -17.10152800 |
| C | 31.68350600 | 1.10951300  | -16.97993200 |
| C | 32.34735600 | 0.35626200  | -15.82385800 |
| C | 31.76404200 | 0.75093300  | -14.46339900 |
| C | 32.21888700 | 2.08754800  | -13.91155500 |
| O | 33.08124800 | 2.72392800  | -14.67183300 |
| O | 31.83407000 | 2.49930700  | -12.81362600 |
| H | 30.04461400 | -0.08813900 | -17.59243100 |
| H | 31.75824600 | 2.18906500  | -16.84753200 |
| H | 32.19756000 | -0.72055000 | -15.97061700 |
| H | 33.42542800 | 0.54126300  | -15.83758300 |
| H | 30.66963100 | 0.75956900  | -14.49145500 |
| H | 32.02192200 | 0.01116700  | -13.69865700 |
| C | 26.82372500 | -1.19040300 | -10.79719400 |
| O | 26.69043000 | -2.38741100 | -10.81528000 |
| O | 27.10746600 | -0.22702000 | -10.15014500 |
| C | 26.35351000 | -0.52317200 | -12.75945100 |
| C | 25.19331700 | -1.32202900 | -13.02232500 |
| O | 25.28156800 | -2.61688400 | -13.11541500 |
| C | 23.93906700 | -0.65125100 | -13.15126800 |
| C | 23.88115200 | 0.72521700  | -13.10462800 |
| C | 25.03714100 | 1.51642600  | -12.87085800 |
| C | 26.25275300 | 0.89551200  | -12.71401900 |
| H | 27.32929900 | -0.96087300 | -12.94503300 |
| H | 23.04715200 | -1.23241900 | -13.36511300 |
| H | 22.92550200 | 1.21567100  | -13.24991200 |
| H | 24.95748000 | 2.59553100  | -12.82696700 |
| H | 27.15872400 | 1.46555300  | -12.53027300 |
| O | 26.39947000 | -5.27875000 | -13.87294900 |
| H | 25.53452000 | -5.08319400 | -14.30367300 |
| H | 27.09960600 | -5.46453400 | -14.52072300 |
| O | 23.91879200 | -4.33922500 | -14.49723800 |
| H | 23.30708200 | -4.74845400 | -13.87235000 |
| H | 24.27799400 | -3.54584600 | -14.00298600 |
| O | 21.08110700 | -1.88094500 | -14.38757300 |
| H | 21.25729700 | -1.56101200 | -15.28849800 |
| H | 20.12745800 | -1.71890800 | -14.21962400 |
| C | 34.22877200 | 4.62612400  | -6.61580400  |
| C | 33.58648800 | 3.35012800  | -6.05870400  |
| C | 32.28742000 | 2.93307800  | -6.75991300  |
| C | 31.98367100 | 1.44105600  | -6.52324900  |
| N | 30.59366800 | 1.05600100  | -6.73762600  |
| C | 29.99727900 | 0.92377700  | -7.93992000  |
| N | 30.58843800 | 1.35015400  | -9.05024900  |
| N | 28.76463900 | 0.40134400  | -7.97273400  |
| H | 34.58306000 | 4.44110100  | -7.63843000  |
| H | 34.31845900 | 2.53556200  | -6.14362300  |
| H | 33.38759400 | 3.46416300  | -4.98586600  |
| H | 31.44581400 | 3.53592700  | -6.40113300  |
| H | 32.37831200 | 3.14476300  | -7.83364600  |
| H | 32.63667600 | 0.81220500  | -7.14210700  |
| H | 32.20851200 | 1.19135900  | -5.48321100  |
| H | 30.05440900 | 0.74451300  | -5.94344200  |
| H | 31.44996700 | 1.86446900  | -8.98329100  |
| H | 30.17969400 | 1.20135900  | -10.01616400 |
| H | 28.56525700 | -0.37506200 | -7.32850000  |
| H | 28.33971900 | 0.26105300  | -8.88608600  |
| C | 31.09195300 | 7.81107400  | -10.76997800 |
| C | 30.08362000 | 7.05196500  | -9.88819700  |
| C | 28.77315200 | 6.82379600  | -10.58021000 |
| C | 27.58168000 | 7.46458000  | -10.34880700 |
| C | 28.53996900 | 5.90155600  | -11.66941200 |
| C | 27.17737000 | 6.04130900  | -12.05389300 |
| C | 29.34095900 | 4.95728500  | -12.33728200 |
| N | 26.61745600 | 7.00077100  | -11.23063500 |
| C | 26.61133400 | 5.28216500  | -13.08272700 |
| C | 28.78467300 | 4.20201200  | -13.36233700 |
| C | 27.43498500 | 4.36939900  | -13.73370100 |
| H | 31.14514700 | 7.33621000  | -11.75607300 |
| H | 30.51512900 | 6.08052400  | -9.61032500  |
| H | 29.92222600 | 7.59499900  | -8.94971800  |
| H | 27.33782900 | 8.22118900  | -9.61655400  |
| H | 25.66077600 | 7.31048100  | -11.26172000 |
| H | 30.38138600 | 4.80854300  | -12.06437500 |
| H | 25.57384500 | 5.41080300  | -13.37243200 |
| H | 29.38834100 | 3.48575500  | -13.90509400 |
| H | 27.04374900 | 3.78173400  | -14.55705400 |
| O | 29.72441200 | 1.09478000  | -11.54702800 |
| H | 30.39866100 | 1.56910800  | -12.07257700 |
| H | 29.66806000 | 0.16766500  | -11.87801600 |
| N | 16.94820300 | -3.32816200 | -12.65670300 |
| C | 16.59798600 | -4.44999200 | -11.75904000 |
| C | 15.33386500 | -3.93730600 | -11.05099800 |
| C | 14.68108900 | -3.02334500 | -12.09924400 |
| C | 15.88215300 | -2.31756700 | -12.73607600 |
| H | 17.41418800 | -4.64122100 | -11.06075200 |
| H | 14.68719900 | -4.75370400 | -10.72125900 |
| H | 15.61431600 | -3.35250500 | -10.16786100 |
| H | 14.15873900 | -3.62554500 | -12.85077200 |
| H | 13.96267200 | -2.31948600 | -11.67239400 |
| H | 15.72672700 | -2.01914700 | -13.77536200 |
| H | 16.17613400 | -1.41962100 | -12.17805100 |
| C | 29.55108800 | -2.94419100 | -1.16181100  |
| C | 28.26630100 | -3.76079300 | -1.33850900  |
| C | 28.03382200 | -4.27029600 | -2.76121700  |
| C | 27.85789400 | -3.18186400 | -3.80571100  |
| O | 28.02659900 | -1.98912900 | -3.61898200  |
| O | 27.53172500 | -3.69630600 | -4.99685900  |

|    |             |             |              |
|----|-------------|-------------|--------------|
| H  | 29.53334800 | -2.11094900 | -1.86800100  |
| H  | 28.26542100 | -4.62046100 | -0.65731000  |
| H  | 27.41444600 | -3.13393700 | -1.04911600  |
| H  | 28.87683900 | -4.88795900 | -3.09968300  |
| H  | 27.15614800 | -4.92526500 | -2.81245600  |
| H  | 30.46537500 | -3.51011900 | -1.36803700  |
| H  | 29.56598300 | -2.49711900 | -0.16245200  |
| C  | 34.86214100 | 7.99988500  | -10.31617100 |
| C  | 35.22429900 | 6.50006100  | -10.32013600 |
| C  | 34.99163200 | 5.86455200  | -11.65186900 |
| C  | 34.07609200 | 4.93995100  | -12.09298800 |
| N  | 35.70498000 | 6.22080700  | -12.78751900 |
| C  | 35.21219600 | 5.51603700  | -13.84223800 |
| N  | 34.22655300 | 4.73463700  | -13.44963800 |
| H  | 35.56972000 | 8.59020500  | -10.90758200 |
| H  | 36.26273200 | 6.35249100  | -9.99566200  |
| H  | 34.59821800 | 5.97471300  | -9.59221300  |
| H  | 36.45456200 | 6.89487800  | -12.82444400 |
| H  | 33.31987600 | 4.40259000  | -11.54029000 |
| H  | 35.59646600 | 5.60103200  | -14.84785800 |
| H  | 33.44573700 | 3.56487900  | -14.20582000 |
| H  | 34.87088700 | 8.38158600  | -9.28967800  |
| H  | 33.87099300 | 8.09565400  | -10.77183300 |
| Mg | 26.77755100 | -3.88239200 | -12.37536800 |

# E:P-A<sub>Mg</sub>(0.8 kcal/mol)

|   |             |             |              |
|---|-------------|-------------|--------------|
| H | 20.66696200 | -6.80399600 | -16.56499300 |
| H | 16.39001100 | -5.37402200 | -12.30896600 |
| H | 24.65800100 | -6.75700400 | -19.16500000 |
| H | 29.36500000 | -8.34200500 | -18.17999500 |
| H | 35.11205800 | 4.86988300  | -6.01603900  |
| H | 32.10201300 | 7.76386000  | -10.35104600 |
| H | 33.92499700 | -0.03000700 | -10.21099800 |
| H | 31.95004000 | -4.27895000 | -6.58615800  |
| H | 23.18504000 | 1.49701100  | -4.32301100  |
| H | 22.41700800 | 4.62904400  | -7.60403400  |
| H | 22.25399600 | 6.38997200  | -15.14805200 |
| H | 33.53406000 | 5.46904900  | -6.68101800  |
| H | 30.78102800 | 8.84800600  | -10.93701400 |
| H | 23.93695100 | 6.31000100  | -15.82104200 |
| H | 23.80795800 | -0.12305200 | -3.81401500  |
| H | 32.79715300 | -3.33874400 | -5.29808200  |
| H | 32.07469200 | 0.82265900  | -17.96202400 |
| H | 30.43537700 | -3.27779200 | -15.73599300 |
| H | 31.70211600 | -4.16466600 | -14.93609300 |
| H | 30.41806500 | -9.05986400 | -14.20509200 |
| H | 20.88600900 | -5.05001100 | -16.84101100 |
| H | 34.15695600 | -4.71599800 | -10.10795400 |
| H | 23.72497700 | -8.30802000 | -7.05604600  |
| H | 21.59205700 | -3.72900800 | -7.32007100  |
| H | 27.89793400 | 0.15108100  | -17.74212300 |
| H | 27.15884000 | 4.34406200  | -6.69900200  |
| C | 29.55192400 | -8.45614000 | -13.91485300 |
| C | 29.03594000 | -7.65705700 | -15.10151700 |
| O | 28.74874900 | -6.45579500 | -15.06883300 |
| C | 29.79907000 | -7.56100300 | -12.69444200 |
| C | 28.47449200 | -7.12813800 | -12.03791900 |
| C | 28.69684000 | -6.04606700 | -10.98228200 |
| O | 29.46083700 | -6.29870500 | -10.03600400 |
| O | 28.07627600 | -4.92394600 | -11.12647800 |
| H | 28.77364700 | -9.19348000 | -13.66464700 |
| H | 30.41390400 | -8.07900200 | -11.95405100 |
| H | 30.35494300 | -6.67347200 | -13.01331200 |
| H | 27.76590900 | -6.78653200 | -12.78968700 |
| H | 28.03770800 | -8.00004500 | -11.53314900 |
| N | 28.94185200 | -8.37322900 | -16.23902600 |
| C | 28.68997800 | -7.77100000 | -17.53402200 |
| C | 27.22990900 | -7.97694800 | -17.94105600 |
| O | 26.76503900 | -9.10557500 | -18.04415700 |
| H | 29.08781800 | -9.37076200 | -16.21346500 |
| H | 28.99641900 | -6.72489300 | -17.49195000 |
| N | 26.51380200 | -6.83353900 | -18.10986500 |
| C | 25.05601700 | -6.83998800 | -18.14799700 |
| C | 24.49490800 | -5.72603000 | -17.27061900 |
| H | 26.96363000 | -5.96041200 | -17.87358400 |
| H | 24.74208800 | -7.82210000 | -17.78285000 |
| H | 23.40606700 | -5.69225500 | -17.34868000 |
| H | 24.75641100 | -5.88125500 | -16.22233500 |
| H | 24.87124200 | -4.74072900 | -17.56794100 |
| C | 23.25807700 | 6.03493500  | -15.04084500 |
| C | 23.25635800 | 4.49075800  | -15.00950700 |
| C | 22.39033900 | 3.85627600  | -13.95014800 |
| C | 22.71577000 | 3.97024400  | -12.59356800 |
| C | 21.27096100 | 3.08525900  | -14.28781500 |
| C | 21.96893900 | 3.32476600  | -11.61452400 |
| C | 20.50996200 | 2.42987900  | -13.32138600 |
| C | 20.86594700 | 2.54534800  | -11.97594600 |
| O | 20.11441100 | 1.87956100  | -11.04878400 |
| H | 23.64548400 | 6.44169100  | -14.09953400 |
| H | 22.93457300 | 4.12887300  | -15.99258400 |
| H | 24.28653100 | 4.13330400  | -14.88489100 |
| H | 23.58939200 | 4.54346900  | -12.29510700 |
| H | 20.99961300 | 2.98044700  | -15.33533400 |
| H | 22.25656900 | 3.39459700  | -10.57272200 |
| H | 19.65716400 | 1.81486700  | -13.58930200 |
| H | 20.55823900 | 1.95079200  | -10.19184700 |
| C | 20.86203000 | -5.83996500 | -16.08300000 |
| C | 19.86793600 | -5.66151600 | -14.94143400 |

|   |             |             |              |   |             |             |              |
|---|-------------|-------------|--------------|---|-------------|-------------|--------------|
| O | 19.22846900 | -6.61161700 | -14.49938500 | H | 33.54003900 | 0.18329400  | -11.92417200 |
| H | 21.86699600 | -5.88917400 | -15.64657000 | H | 32.25386000 | -0.24347800 | -10.77679500 |
| N | 19.80880200 | -4.40774600 | -14.39931700 | C | 30.70332400 | -3.79250400 | -14.83681700 |
| C | 19.19502400 | -4.19800500 | -13.09497100 | C | 30.71107300 | -2.83431700 | -13.64055200 |
| C | 18.18282300 | -3.06121000 | -13.14520600 | C | 29.38117300 | -2.59524500 | -12.92685900 |
| O | 18.46795500 | -1.95728400 | -13.63914200 | O | 28.36588400 | -3.21682600 | -13.36675500 |
| C | 20.31908600 | -3.93132200 | -12.06882700 | O | 29.39680100 | -1.83334500 | -11.92478100 |
| O | 19.84877400 | -3.81453300 | -10.72701700 | H | 30.01430900 | -4.62149100 | -14.68074700 |
| H | 20.40507000 | -3.64874500 | -14.73871500 | H | 31.38420100 | -3.20545000 | -12.85988500 |
| H | 18.70798600 | -5.13966700 | -12.84492200 | H | 31.11420800 | -1.85645400 | -13.92183800 |
| H | 20.98896000 | -4.79619100 | -12.09546100 | C | 27.87497500 | 1.06283400  | -17.13691400 |
| H | 20.89282000 | -3.04918100 | -12.37394300 | C | 29.24829800 | 1.57447900  | -16.75549200 |
| H | 19.61561000 | -2.89037400 | -10.57295900 | O | 29.41881900 | 2.63532400  | -16.15689200 |
| C | 23.90606600 | -7.35579000 | -7.56602500  | C | 27.04832100 | 0.80097700  | -15.85956000 |
| C | 22.91543800 | -6.30797500 | -7.08304000  | C | 25.61676000 | 0.45451100  | -16.16530900 |
| O | 21.75808500 | -6.61794400 | -6.79662300  | C | 24.70890200 | 1.45824000  | -16.51644900 |
| C | 23.66122300 | -7.59095500 | -9.08626000  | C | 25.15690200 | -0.86355800 | -16.10168400 |
| C | 24.05026200 | -6.43566000 | -9.95190700  | C | 23.37413100 | 1.16242100  | -16.78052900 |
| C | 25.23749000 | -6.16660300 | -10.58551500 | C | 23.82796200 | -1.18042400 | -16.36583200 |
| N | 23.26715000 | -5.31070600 | -10.18339600 | C | 22.94021500 | -0.15938700 | -16.69167300 |
| C | 23.99388000 | -4.42520100 | -10.91772600 | O | 21.61324800 | -0.50833700 | -16.89050600 |
| N | 25.19529700 | -4.92024200 | -11.17719600 | H | 27.38519700 | 1.84130800  | -17.73124500 |
| H | 24.94746100 | -7.06868700 | -7.40195600  | H | 27.50758600 | -0.00650200 | -15.28039000 |
| H | 24.24248600 | -8.45995200 | -9.40868200  | H | 27.09168800 | 1.69029200  | -15.22750500 |
| H | 22.60378800 | -7.84271100 | -9.22297900  | H | 25.04251200 | 2.49113300  | -16.56113800 |
| H | 22.33838300 | -5.14342600 | -9.81841000  | H | 25.83022100 | -1.65548600 | -15.78850600 |
| H | 26.11655000 | -6.78705600 | -10.63752200 | H | 22.67302800 | 1.95449700  | -17.03193600 |
| H | 23.64717800 | -3.45804900 | -11.24758500 | H | 23.48242900 | -2.19984700 | -16.24796900 |
| N | 23.32002400 | -5.00628300 | -7.11240400  | H | 21.09227000 | 0.29770800  | -17.00128000 |
| C | 22.40693600 | -3.96405600 | -6.62791900  | N | 30.27339600 | 0.75071100  | -17.09255500 |
| C | 23.31890400 | -2.76317500 | -6.36255200  | C | 31.68346200 | 1.10947300  | -16.97993400 |
| C | 24.49705400 | -2.97801600 | -7.32042300  | C | 32.37152900 | 0.34757000  | -15.84483200 |
| C | 24.69629700 | -4.49641400 | -7.28719700  | C | 31.77480700 | 0.68604800  | -14.47886700 |
| H | 21.90916800 | -4.32193900 | -5.72080600  | C | 32.14268900 | 2.04159700  | -13.91075000 |
| H | 22.80951000 | -1.81638000 | -6.52614700  | O | 33.01416100 | 2.70920800  | -14.63179000 |
| H | 23.67731600 | -2.78524800 | -5.32770800  | O | 31.68649700 | 2.43144600  | -12.83331700 |
| H | 24.23356300 | -2.64688600 | -8.33039100  | H | 30.04899400 | -0.09211900 | -17.59866600 |
| H | 25.39659400 | -2.44335700 | -7.01087400  | H | 31.75170200 | 2.18825700  | -16.84104200 |
| H | 25.15099900 | -4.88004400 | -8.20131800  | H | 32.25739700 | -0.72938300 | -16.02020600 |
| H | 25.33289300 | -4.77923700 | -6.43850900  | H | 33.44275400 | 0.56890500  | -15.85299100 |
| C | 23.17501400 | 4.07091000  | -8.16503000  | H | 30.68208600 | 0.62447000  | -14.50783500 |
| C | 24.47130800 | 3.93728300  | -7.38552400  | C | 32.09111400 | -0.04391300 | -13.72628600 |
| O | 24.49781500 | 3.83706300  | -6.15814300  | C | 26.51151100 | -0.43293800 | -12.41557200 |
| H | 22.78418500 | 3.06675500  | -8.35858400  | C | 25.38057300 | -1.22574900 | -12.70373400 |
| H | 23.31804300 | 4.57522900  | -9.12259400  | O | 25.43077300 | -2.56212500 | -12.67587200 |
| N | 25.60507100 | 3.91413200  | -8.13913400  | C | 24.17459900 | -0.56864700 | -13.03489100 |
| C | 26.90925200 | 3.66688500  | -7.52199100  | C | 24.11575100 | 0.82075200  | -13.09861800 |
| C | 27.87944100 | 3.79304600  | -8.70091100  | C | 25.24565200 | 1.59902000  | -12.82725000 |
| C | 27.07071300 | 3.21752500  | -9.86619900  | C | 26.44089200 | 0.95903000  | -12.48801100 |
| C | 25.66368300 | 3.76844200  | -9.61042600  | H | 27.44455700 | -0.92051700 | -12.15612400 |
| H | 26.93526800 | 2.64928100  | -7.10492200  | H | 23.29716600 | -1.15885500 | -13.28496500 |
| H | 28.10228100 | 4.84790200  | -8.89220500  | H | 23.18311000 | 1.29717700  | -13.37678300 |
| H | 28.82203600 | 3.27165700  | -8.52712500  | H | 25.20006100 | 2.68037400  | -12.88346000 |
| H | 27.45358800 | 3.49498500  | -10.84704200 | H | 27.33879400 | 1.53545800  | -12.28892600 |
| H | 27.04923300 | 2.12571200  | -9.80812700  | O | 26.36342600 | -5.27864800 | -13.94561500 |
| H | 25.53374200 | 4.74316800  | -10.09711800 | H | 25.56181800 | -4.91273300 | -14.39870000 |
| H | 24.89342600 | 3.08692600  | -9.97697000  | H | 27.08912800 | -5.44200200 | -14.57169700 |
| C | 23.37400300 | 0.46303800  | -4.63000300  | O | 24.24865600 | -3.82155900 | -14.60857200 |
| C | 24.35491400 | 0.47309000  | -5.81678300  | H | 23.32129300 | -3.96709300 | -14.38486100 |
| C | 23.76405600 | 0.51720600  | -7.21291500  | H | 24.60416700 | -3.21971600 | -13.87629400 |
| C | 22.39031800 | 0.50672900  | -7.47471900  | O | 21.12289500 | -1.94531400 | -14.49170900 |
| C | 24.63906500 | 0.48151200  | -8.31247000  | H | 21.24921800 | -1.44713500 | -15.31806400 |
| C | 21.90835400 | 0.40088100  | -8.78512600  | H | 20.21671900 | -1.72548600 | -14.18618300 |
| C | 24.16876200 | 0.39806600  | -9.62040200  | C | 34.22881400 | 4.62608000  | -6.61595400  |
| C | 22.79122200 | 0.34152200  | -9.86259400  | C | 33.55832900 | 3.35814400  | -6.06335900  |
| H | 22.42114700 | -0.01498600 | -4.87153400  | C | 32.23558700 | 2.99293300  | -6.75760400  |
| H | 25.02698200 | 1.33088700  | -5.70441700  | C | 31.91088900 | 1.49619700  | -6.59668000  |
| H | 24.99294400 | -0.41830500 | -5.77177700  | N | 30.55974300 | 1.10819700  | -7.00443300  |
| H | 21.68165500 | 0.55326700  | -6.65549400  | C | 30.16357600 | 0.99060000  | -8.28658800  |
| H | 25.71150000 | 0.49906500  | -8.12945500  | N | 30.88837800 | 1.47602400  | -9.28683600  |
| H | 20.83588000 | 0.32366200  | -8.95145400  | N | 28.97628800 | 0.42117500  | -8.55127500  |
| H | 24.86242100 | 0.35480100  | -10.45111000 | H | 34.58153800 | 4.43808400  | -7.63842400  |
| H | 22.43141600 | 0.24910200  | -10.88031500 | H | 34.26399700 | 2.52296400  | -6.16714600  |
| C | 32.20578600 | -3.28034500 | -6.21773200  | H | 33.37709900 | 3.46596000  | -4.98719100  |
| C | 30.89934200 | -2.48367800 | -6.01572300  | H | 31.40907600 | 3.58836600  | -6.35445200  |
| C | 29.92356200 | -2.67449500 | -7.14714500  | H | 32.30561600 | 3.26157900  | -7.81940500  |
| C | 30.07507500 | -3.46309900 | -8.26217000  | H | 32.64402700 | 0.88730400  | -7.14232400  |
| N | 28.63809600 | -2.12069400 | -7.15716500  | H | 32.00149100 | 1.22079400  | -5.54313700  |
| C | 28.05473600 | -2.59823800 | -8.26680600  | H | 29.95952000 | 0.67518000  | -6.31616200  |
| N | 28.88683100 | -3.39792300 | -8.95300900  | H | 31.74998800 | 1.96127600  | -9.11468200  |
| H | 32.81307000 | -2.82724300 | -7.00237500  | H | 30.56730500 | 1.24298500  | -10.25813300 |
| H | 30.40933100 | -2.78408000 | -5.08139800  | H | 28.67611300 | -0.33823900 | -7.92781500  |
| H | 31.12701000 | -1.41539500 | -5.88908300  | H | 28.75294000 | 0.30182500  | -9.53409000  |
| H | 27.77286300 | -2.82485900 | -5.73993300  | C | 31.09195400 | 7.81107100  | -10.76997800 |
| H | 30.90230100 | -4.06517100 | -8.60158700  | C | 30.08589000 | 7.05356400  | -9.88361300  |
| H | 27.04988700 | -2.37038000 | -8.59284000  | C | 28.77407400 | 6.82571400  | -10.57249000 |
| H | 28.64699400 | -3.93264700 | -9.80709600  | C | 27.58170700 | 7.46400500  | -10.33790300 |
| C | 33.48009300 | -4.18193700 | -10.78309300 | C | 28.54379400 | 5.91243500  | -11.66959500 |
| C | 33.37307600 | -2.73638700 | -10.32161000 | C | 27.18284400 | 6.05650100  | -12.05758600 |
| O | 33.12965500 | -2.39291500 | -9.17000200  | C | 29.34707000 | 4.97456800  | -12.34398300 |
| C | 32.14181900 | -4.93740600 | -10.77906100 | N | 26.61992900 | 7.00707100  | -11.22581600 |
| O | 31.99102200 | -5.59310600 | -9.54082700  | C | 26.62171600 | 5.31171300  | -13.09950900 |
| H | 33.91997200 | -4.21627300 | -11.78637000 | C | 28.79520300 | 4.23313700  | -13.38154600 |
| H | 31.30980300 | -4.24149900 | -10.96734100 | C | 27.44798300 | 4.40763100  | -13.75834600 |
| H | 32.14583600 | -5.66121200 | -11.60979700 | H | 31.14313400 | 7.33458500  | -11.75522900 |
| H | 31.09302700 | -5.98772100 | -9.56406600  | H | 30.51848700 | 6.08233600  | -9.60583100  |
| N | 33.57541300 | -1.80182100 | -11.30149800 | H | 29.92792200 | 7.59807700  | -8.94539000  |
| C | 33.30499500 | -0.40202700 | -11.03299900 | H | 27.33619100 | 8.21523600  | -9.60067500  |
| H | 33.58943000 | -2.10831800 | -12.26177500 | H | 25.66374000 | 7.31826300  | -11.25869300 |

|    |             |             |              |
|----|-------------|-------------|--------------|
| H  | 30.38558400 | 4.82031000  | -12.06696400 |
| H  | 25.58496200 | 5.44142000  | -13.39087800 |
| H  | 29.40007900 | 3.52234600  | -13.93012700 |
| H  | 27.05922200 | 3.82644300  | -14.58700400 |
| O  | 29.77200700 | 0.76422800  | -11.57138100 |
| H  | 30.26755700 | 1.29275600  | -12.22498500 |
| H  | 29.76860800 | -0.19686500 | -11.82393100 |
| N  | 16.95970700 | -3.31531600 | -12.63669600 |
| C  | 16.59798600 | -4.44996900 | -11.75906300 |
| C  | 15.33377100 | -3.94147100 | -11.04549900 |
| C  | 14.69993800 | -2.98808400 | -12.06989500 |
| C  | 15.91539800 | -2.28000000 | -12.67459300 |
| H  | 17.41026200 | -4.65381500 | -11.05832700 |
| H  | 14.67460300 | -4.75907400 | -10.74479800 |
| H  | 15.61382700 | -3.38632300 | -10.14345000 |
| H  | 14.17560100 | -3.55967100 | -12.84364800 |
| H  | 13.98780900 | -2.28821900 | -11.62631700 |
| H  | 15.76864300 | -1.93511200 | -13.70070400 |
| H  | 16.22607600 | -1.41283200 | -12.07827900 |
| C  | 29.55108500 | -2.94420300 | -1.16181700  |
| C  | 28.25978400 | -3.73471000 | -1.39346100  |
| C  | 28.05434600 | -4.18659100 | -2.84250500  |
| C  | 27.90364700 | -3.06183800 | -3.85379200  |
| O  | 28.07842900 | -1.87752400 | -3.63011700  |
| O  | 27.58793600 | -3.53731000 | -5.06720300  |
| H  | 29.55856200 | -2.09931000 | -1.85594000  |
| H  | 28.22970700 | -4.62102400 | -0.74823800  |
| H  | 27.40989000 | -3.10722200 | -1.10014000  |
| H  | 28.90092600 | -4.79672200 | -3.18577000  |
| H  | 27.17493600 | -4.83439600 | -2.93549400  |
| H  | 30.46537900 | -3.51011600 | -1.36802900  |
| H  | 29.56598400 | -2.49711300 | -0.16245500  |
| C  | 34.86212300 | 7.99988500  | -10.31615300 |
| C  | 35.21670200 | 6.49794800  | -10.31552700 |
| C  | 34.94281000 | 5.85662200  | -11.63597700 |
| C  | 33.99793300 | 4.94868200  | -12.04901800 |
| N  | 35.62982700 | 6.19760200  | -12.79192800 |
| C  | 35.09421100 | 5.50063000  | -13.83073000 |
| N  | 34.10550800 | 4.73882200  | -13.40853200 |
| H  | 35.57172300 | 8.58599900  | -10.90895600 |
| H  | 36.26210000 | 6.34567200  | -10.01703900 |
| H  | 34.60590500 | 5.98256900  | -9.56778900  |
| H  | 36.38933500 | 6.85886500  | -12.85160600 |
| H  | 33.24755600 | 4.42948700  | -11.47146000 |
| H  | 35.45155100 | 5.57553200  | -14.84700200 |
| H  | 33.33525600 | 3.56141800  | -14.15545300 |
| H  | 34.87090100 | 8.38159200  | -9.28968000  |
| H  | 33.87099800 | 8.09564800  | -10.77184600 |
| Mg | 26.79797600 | -3.98448800 | -12.39027700 |

The transition states and intermediates involved in the reaction pathway with **Mode-A** for the Mn-enzyme of SDC.

#### E:S-A<sub>Mn</sub> (0.0 kcal/mol)

|   |             |             |              |
|---|-------------|-------------|--------------|
| H | 20.66700100 | -6.80399900 | -16.56500200 |
| H | 16.38999700 | -5.37400500 | -12.30899000 |
| H | 24.65788400 | -6.75700200 | -19.16495600 |
| H | 29.36490400 | -8.34212700 | -18.17998900 |
| H | 35.11198300 | 4.87000600  | -6.01597800  |
| H | 32.10200100 | 7.76400800  | -10.35100300 |
| H | 33.92499300 | -0.03000300 | -10.21099400 |
| H | 31.95001600 | -4.27901000 | -6.58598400  |
| H | 23.18497500 | 1.49700000  | -4.32301400  |
| H | 22.41699500 | 4.62899700  | -7.60400300  |
| H | 22.25399900 | 6.39001100  | -15.14796100 |
| H | 33.53400500 | 5.46900600  | -6.68098300  |
| H | 30.78100600 | 8.84799900  | -10.93701800 |
| H | 23.93692700 | 6.31001000  | -15.82106000 |
| H | 23.80799800 | -0.12300700 | -3.81400400  |
| H | 32.79699400 | -3.33901300 | -5.29799700  |
| H | 32.07500100 | 0.82299300  | -17.96199700 |
| H | 30.43503100 | -3.27798500 | -15.73600100 |
| H | 31.70201000 | -4.16496500 | -14.93603400 |
| H | 30.41797600 | -9.06002500 | -14.20502200 |
| H | 20.88600700 | -5.04999900 | -16.84099900 |
| H | 34.15702300 | -4.71602400 | -10.10804100 |
| H | 23.72503500 | -8.30800300 | -7.05599300  |
| H | 21.59199900 | -3.72899900 | -7.32000000  |
| H | 27.89800000 | 0.15100300  | -17.74200400 |
| H | 27.15898500 | 4.34400000  | -6.69899600  |
| C | 29.55210200 | -8.45608100 | -13.91504200 |
| C | 29.04259600 | -7.66205700 | -15.10718900 |
| O | 28.76832400 | -6.45499800 | -15.08229300 |
| C | 29.81579400 | -7.53701100 | -12.71517100 |
| C | 28.50794200 | -6.99684200 | -12.09893600 |
| C | 28.81176600 | -5.88288100 | -11.09415000 |
| O | 29.41627200 | -6.19730700 | -10.05579900 |
| O | 28.46307400 | -4.67880700 | -11.40566300 |
| H | 28.77162800 | -9.18488900 | -13.64936300 |
| H | 30.37887400 | -8.06588000 | -11.94185300 |
| H | 30.43442700 | -6.69632300 | -13.04628100 |

|   |             |             |              |
|---|-------------|-------------|--------------|
| H | 27.83999300 | -6.63026800 | -12.87607000 |
| H | 28.01343300 | -7.81893900 | -11.56774500 |
| N | 28.94291300 | -8.37692700 | -16.24066000 |
| C | 28.68992200 | -7.77067700 | -17.53380400 |
| C | 27.22819600 | -7.97726700 | -17.93397900 |
| O | 26.76304000 | -9.10718800 | -18.02293500 |
| H | 29.08045300 | -9.37587900 | -16.21600200 |
| H | 28.99732900 | -6.72527900 | -17.49008000 |
| N | 26.51341200 | -6.83514900 | -18.10759400 |
| C | 25.05622400 | -6.84006300 | -18.14811200 |
| C | 24.49020700 | -5.70965200 | -17.29554600 |
| H | 26.96444700 | -5.95860700 | -17.88632700 |
| H | 24.73742500 | -7.81727300 | -17.77495800 |
| H | 23.40185600 | -5.67912800 | -17.38020200 |
| H | 24.73857600 | -5.82877700 | -16.24015500 |
| H | 24.86609200 | -4.73176300 | -17.61929300 |
| C | 23.25808900 | 6.03498200  | -15.04099300 |
| C | 23.21518500 | 4.49381000  | -14.98757800 |
| C | 22.29352200 | 3.92862900  | -13.93386400 |
| C | 22.59162200 | 4.06142500  | -12.57238900 |
| C | 21.14284800 | 3.20850500  | -14.27951100 |
| C | 21.79920200 | 3.46817600  | -11.59627700 |
| C | 20.33356300 | 2.60908800  | -13.31534600 |
| C | 20.67243700 | 2.72773000  | -11.96561700 |
| O | 19.88325300 | 2.10066300  | -11.04154700 |
| H | 23.64407100 | 6.44515900  | -14.10142300 |
| H | 22.90187800 | 4.11821300  | -15.96911000 |
| H | 24.22955900 | 4.10510100  | -14.83062600 |
| H | 23.48186100 | 4.60383200  | -12.26560800 |
| H | 20.88884200 | 3.09068000  | -15.33015800 |
| H | 22.06926700 | 3.54876300  | -10.54996500 |
| H | 19.45903100 | 2.02928000  | -13.59069900 |
| H | 20.31264200 | 2.17287400  | -10.17740000 |
| C | 20.86198800 | -5.84000100 | -16.08300000 |
| C | 19.84885400 | -5.64590400 | -14.96290100 |
| O | 19.09668200 | -6.54949300 | -14.60684900 |
| H | 21.86456600 | -5.86367400 | -15.64099100 |
| N | 19.89990100 | -4.43199800 | -14.34112700 |
| C | 19.19499400 | -4.19800800 | -13.09499700 |
| C | 18.14096200 | -3.10043600 | -13.23534900 |
| O | 18.37478100 | -2.03692800 | -13.83403500 |
| C | 20.24003400 | -3.83040700 | -12.01633100 |
| O | 19.67490600 | -3.62256400 | -10.72545400 |
| H | 20.53873100 | -3.69063700 | -14.64006000 |
| H | 18.72300900 | -5.14503100 | -12.83485900 |
| H | 20.92891800 | -4.67719200 | -11.93117000 |
| H | 20.81455100 | -2.95989300 | -12.35328800 |
| H | 19.39403500 | -2.70055500 | -10.66958200 |
| C | 23.90595300 | -7.35598500 | -7.56603000  |
| C | 22.89474500 | -6.30561600 | -7.13319500  |
| O | 21.71836700 | -6.60514100 | -6.92357200  |
| C | 23.76312400 | -7.60380700 | -9.05276000  |
| C | 24.16296400 | -6.44036300 | -9.94754800  |
| C | 25.33892000 | -6.15732300 | -10.60125600 |
| N | 23.36486300 | -5.32538600 | -10.16816200 |
| C | 24.06674500 | -4.42886800 | -10.91047900 |
| N | 25.26914700 | -4.91207600 | -11.19651200 |
| H | 24.93423800 | -7.05711200 | -7.34660400  |
| H | 24.38886100 | -8.45562000 | -9.37714700  |
| H | 22.72388800 | -7.88660800 | -9.29765800  |
| H | 22.45051600 | -5.16584300 | -9.76605300  |
| H | 26.22717200 | -6.76471900 | -10.66145300 |
| H | 23.70513600 | -3.46362600 | -11.23067900 |
| N | 23.31956600 | -5.01015500 | -7.10897500  |
| C | 22.40700500 | -3.96400600 | -6.62800400  |
| C | 23.31765500 | -2.75963800 | -6.36461100  |
| C | 24.52271600 | -2.99416900 | -7.28446500  |
| C | 24.70685100 | -4.51325900 | -7.23227600  |
| H | 21.90802400 | -4.31789800 | -5.71953600  |
| H | 22.81340900 | -1.81599900 | -6.56311700  |
| H | 23.64703200 | -2.75740000 | -5.32020600  |
| H | 24.29655200 | -2.66993600 | -8.30576500  |
| H | 25.41867300 | -2.46759800 | -6.95157800  |
| H | 25.19317400 | -4.90582400 | -8.12604900  |
| H | 25.30863300 | -4.79555800 | -6.35856800  |
| C | 23.17500200 | 4.07100700  | -8.16499800  |
| C | 24.46830700 | 3.93151100  | -7.38226000  |
| O | 24.49107400 | 3.82511700  | -6.15512800  |
| H | 22.78050400 | 3.07144500  | -8.37003500  |
| H | 23.32432500 | 4.58226800  | -9.11821500  |
| N | 25.60193900 | 3.91209600  | -8.13479400  |
| C | 26.90901200 | 3.66700400  | -7.52200200  |
| C | 27.87724100 | 3.80279400  | -8.70130200  |
| C | 27.06813200 | 3.24366200  | -9.87360400  |
| C | 25.65736900 | 3.77797100  | -9.60703000  |
| H | 26.94019600 | 2.64841400  | -7.10824500  |
| H | 28.10546300 | 4.85853900  | -8.88028900  |
| H | 28.81673600 | 3.27304100  | -8.53806600  |
| H | 27.45904400 | 3.54222300  | -10.84455400 |
| H | 27.06380900 | 2.15070700  | -9.83415500  |
| H | 25.51479300 | 4.75473700  | -10.08517700 |
| H | 24.88847900 | 3.09433700  | -9.97406800  |
| C | 23.37404100 | 0.46300200  | -6.62998900  |
| C | 24.29743600 | 0.47064400  | -5.85838900  |
| C | 23.62272100 | 0.55063900  | -7.21704900  |
| C | 22.23480500 | 0.60042000  | -7.39376200  |
| C | 24.42413800 | 0.51033500  | -8.37104800  |
| C | 21.66529100 | 0.55274900  | -8.67250100  |
| C | 23.86517600 | 0.48326700  | -9.64607600  |

|   |             |             |              |    |             |             |              |
|---|-------------|-------------|--------------|----|-------------|-------------|--------------|
| C | 22.47538400 | 0.48735400  | -9.80521200  | H  | 21.22723800 | -1.64071900 | -15.44436900 |
| H | 22.41188600 | -0.01273700 | -4.84198800  | H  | 20.09526600 | -1.72249800 | -14.35686200 |
| H | 24.98757500 | 1.31703800  | -5.77233200  | C  | 34.22900000 | 4.62598100  | -6.61604600  |
| H | 24.92158600 | -0.43075100 | -5.86101400  | C  | 33.57478700 | 3.34346600  | -6.07743200  |
| H | 21.58079900 | 0.65797000  | -6.53140800  | C  | 32.27623100 | 2.93765200  | -6.79751100  |
| H | 25.50618800 | 0.48384000  | -8.26191700  | C  | 32.02663200 | 1.41934600  | -6.68902200  |
| H | 20.58164000 | 0.53509700  | -8.77089900  | N  | 30.67233600 | 0.98099700  | -7.02705200  |
| H | 24.50309500 | 0.44252700  | -10.51788900 | C  | 30.16750800 | 0.94159300  | -8.28044500  |
| H | 22.04916200 | 0.43620600  | -10.80077200 | N  | 30.83444700 | 1.48526200  | -9.29808800  |
| C | 32.20597300 | -3.27997700 | -6.21802900  | N  | 28.96651800 | 0.39057200  | -8.47848100  |
| C | 30.88839900 | -2.52052700 | -5.96073000  | H  | 34.58608500 | 4.44796000  | -7.63920100  |
| C | 29.93172400 | -2.64047900 | -7.11301300  | H  | 34.30537300 | 2.52828700  | -6.16808600  |
| C | 30.16732500 | -3.23805800 | -8.32616500  | H  | 33.37035900 | 3.44430600  | -5.00477400  |
| N | 28.59844800 | -2.22117700 | -7.06798800  | H  | 31.41715800 | 3.47527900  | -6.38211300  |
| C | 28.06837500 | -2.58425100 | -8.24211600  | H  | 32.34486500 | 3.24754400  | -7.84793800  |
| N | 28.98323400 | -3.18635700 | -9.02351000  | H  | 32.75870700 | 0.86957900  | -7.29647100  |
| H | 32.79495800 | -2.80195900 | -7.00081100  | H  | 32.18988500 | 1.10883700  | -5.65401800  |
| H | 30.39958200 | -2.90690100 | -5.05841000  | H  | 30.18274600 | 0.42204500  | -6.34237600  |
| H | 31.10401700 | -1.46469300 | -5.73779800  | H  | 31.67513600 | 1.99842100  | -9.09817400  |
| H | 27.78243800 | -2.93530400 | -5.72461100  | H  | 30.34318100 | 1.69866700  | -10.21155000 |
| H | 31.04921100 | -3.71729200 | -8.71277300  | H  | 28.64634900 | -0.29359000 | -7.79218800  |
| H | 27.05925700 | -2.39821200 | -8.57175800  | H  | 28.65916800 | 0.20778300  | -9.44512900  |
| H | 28.80415800 | -3.61351300 | -9.94170600  | C  | 31.09198400 | 7.81100500  | -10.76996600 |
| C | 33.47998600 | -4.18197100 | -10.78294600 | C  | 30.08316800 | 7.04355900  | -9.89825000  |
| C | 33.38954300 | -2.73543500 | -10.32007500 | C  | 28.75388600 | 6.85375500  | -10.56718700 |
| O | 33.18782000 | -2.39414200 | -9.15953400  | C  | 27.55802600 | 7.42852900  | -10.21623200 |
| C | 32.14998400 | -4.94780700 | -10.76681100 | C  | 28.48754600 | 6.02259700  | -11.72150000 |
| O | 31.94988500 | -5.49317700 | -9.48620600  | C  | 27.09970900 | 6.14010500  | -12.01257300 |
| H | 33.91326900 | -4.22172400 | -11.78921200 | C  | 29.27723400 | 5.17739800  | -12.52007200 |
| H | 31.31772200 | -4.28533800 | -11.04896400 | N  | 26.55953100 | 7.00872600  | -11.08158800 |
| H | 32.19875000 | -5.73897700 | -11.53415500 | C  | 26.49467800 | 5.43684200  | -13.05836600 |
| H | 31.02521700 | -5.82201900 | -9.48356900  | C  | 28.68528800 | 4.48660100  | -13.57017100 |
| N | 33.56691800 | -1.80273100 | -11.30363200 | C  | 27.30715200 | 4.61429700  | -13.83316500 |
| C | 33.30500400 | -0.40200400 | -11.03301200 | H  | 31.14953300 | 7.34374500  | -11.75951600 |
| H | 33.55319300 | -2.10989800 | -12.26329400 | H  | 30.50447900 | 6.05764400  | -9.65636600  |
| H | 33.54348200 | 0.18050500  | -11.92576400 | H  | 29.94497100 | 7.56006300  | -8.94108800  |
| C | 32.25567100 | -0.23437400 | -10.77146100 | H  | 27.33260100 | 8.10673300  | -9.40542600  |
| C | 30.70396500 | -3.79207100 | -14.83698100 | H  | 25.59175200 | 7.27788200  | -11.02670300 |
| C | 30.90152300 | -2.83421800 | -13.66072600 | H  | 30.33487600 | 5.04234100  | -12.31708700 |
| C | 29.70564900 | -2.16408500 | -13.04396500 | H  | 25.43478600 | 5.53526100  | -13.26401500 |
| O | 28.55013800 | -2.32436400 | -13.43424300 | H  | 29.27831900 | 3.83782300  | -14.20383900 |
| O | 30.07516600 | -1.39645600 | -12.03508700 | H  | 26.87902700 | 4.06248000  | -14.66430900 |
| H | 30.00124800 | -4.59641100 | -14.62751100 | O  | 29.58197300 | 2.12628000  | -11.52734800 |
| H | 31.38893300 | -3.36282600 | -12.83614100 | H  | 30.24174300 | 2.25947500  | -12.23511100 |
| H | 31.60193100 | -2.03663200 | -13.93881000 | H  | 28.98143200 | 1.38426300  | -11.73850500 |
| C | 27.87499900 | 1.06299600  | -17.13699400 | N  | 16.94298400 | -3.33289000 | -12.66299000 |
| C | 29.24572500 | 1.60019000  | -16.78921700 | C  | 16.59800200 | -4.44999900 | -11.75901300 |
| O | 29.41489800 | 2.68640300  | -16.23835200 | C  | 15.33390900 | -3.93676600 | -11.05199000 |
| C | 27.08305500 | 0.75033100  | -15.84165100 | C  | 14.67374200 | -3.03676700 | -12.10785700 |
| C | 25.70067000 | 0.24096100  | -16.15790600 | C  | 15.86921100 | -2.33203900 | -12.75703700 |
| C | 24.71415800 | 1.12903300  | -16.59846600 | H  | 17.41579200 | -4.63683600 | -11.06151800 |
| C | 25.37459000 | -1.11621100 | -16.05020500 | H  | 14.69203800 | -4.75276900 | -10.71192600 |
| C | 23.43941900 | 0.68175500  | -16.93410600 | H  | 15.61471900 | -3.34170500 | -10.17585800 |
| C | 24.10278400 | -1.58285900 | -16.38079300 | H  | 14.15144400 | -3.64956700 | -12.85085400 |
| C | 23.14394300 | -0.67675900 | -16.82897700 | H  | 13.95340700 | -2.33172500 | -11.68618400 |
| O | 21.88351000 | -1.16957000 | -17.12875700 | H  | 15.71019700 | -2.05094500 | -13.80063100 |
| H | 27.34528300 | 1.83045600  | -17.70936700 | H  | 16.15707400 | -1.42326700 | -12.21362900 |
| H | 27.62486000 | 0.00356300  | -15.25051500 | C  | 29.55096500 | -2.94393800 | -1.16209300  |
| H | 27.02836900 | 1.65523900  | -15.23012600 | C  | 28.26430900 | -3.75214500 | -1.36188800  |
| H | 24.93809700 | 2.19048000  | -16.66276600 | C  | 28.04622300 | -4.24199800 | -2.79516100  |
| H | 26.10818400 | -1.81760700 | -15.66164600 | C  | 27.87409500 | -3.13902400 | -3.82726000  |
| H | 22.67554300 | 1.38687300  | -17.25557300 | O  | 28.01286600 | -1.94754900 | -3.61360900  |
| H | 23.83702300 | -2.62560800 | -16.24405600 | O  | 27.58678200 | -3.64030700 | -5.03449900  |
| H | 21.34419900 | -0.44659600 | -17.47593300 | H  | 29.54260000 | -2.10593600 | -1.86370400  |
| N | 30.26972500 | 0.76098100  | -17.09237800 | H  | 28.25132700 | -4.62099400 | -0.69249900  |
| C | 31.68300200 | 1.10900900  | -16.98000800 | H  | 27.41226100 | -3.12468800 | -1.07490500  |
| C | 32.34248600 | 0.38056700  | -15.80664200 | H  | 28.89315000 | -4.85393400 | -3.13396100  |
| C | 31.77210500 | 0.85922400  | -14.46726700 | H  | 27.17032300 | -4.89819300 | -2.86212400  |
| C | 32.27707500 | 2.20884000  | -13.99237200 | H  | 30.46538600 | -3.51016200 | -1.36787600  |
| O | 33.26484400 | 2.70379000  | -14.70608900 | H  | 29.56609200 | -2.49730800 | -0.16236900  |
| O | 31.82026500 | 2.75652400  | -12.98779600 | C  | 34.86198600 | 8.00000300  | -10.31599400 |
| H | 30.04252300 | -0.10195700 | -17.56207200 | C  | 35.22559200 | 6.50077500  | -10.31822900 |
| H | 31.75335600 | 2.19119300  | -16.86210200 | C  | 35.06217600 | 5.86926500  | -11.66264900 |
| H | 32.16248100 | -0.69668200 | -15.91128800 | C  | 34.14874000 | 4.97379100  | -12.16423900 |
| H | 33.42424200 | 0.53740500  | -15.83168300 | N  | 35.87490500 | 6.18274200  | -12.74297600 |
| H | 30.68013000 | 0.91722500  | -14.50723200 | C  | 35.44016900 | 5.48090600  | -13.82491000 |
| H | 31.99392000 | 0.15415700  | -13.65872600 | N  | 34.39751700 | 4.74204100  | -13.50275000 |
| C | 27.11899000 | -0.83485500 | -11.43572400 | H  | 35.57007200 | 8.58959100  | -10.90753600 |
| O | 27.08183400 | -2.01115900 | -10.96664800 | H  | 36.24806800 | 6.35206300  | -9.94678100  |
| O | 28.11603500 | -0.05739500 | -11.14796000 | H  | 34.56762300 | 5.96985400  | -9.62304900  |
| C | 26.03543000 | -0.31336100 | -12.27461200 | H  | 36.65139400 | 6.82657700  | -12.72803400 |
| C | 24.99769000 | -1.15997900 | -12.77889800 | H  | 33.32820100 | 4.47642200  | -11.66885700 |
| O | 25.09514200 | -2.47334500 | -12.82018200 | H  | 35.90620000 | 5.53660300  | -14.79749100 |
| C | 23.82434000 | -0.52988000 | -13.26526500 | H  | 33.63750600 | 3.55992700  | -14.27435800 |
| C | 23.74503600 | 0.84634500  | -13.38001800 | H  | 34.87100500 | 8.38158900  | -9.28967900  |
| C | 24.83395800 | 1.66447300  | -13.03018200 | H  | 33.87105300 | 8.09549500  | -10.77199200 |
| C | 25.95672600 | 1.08034300  | -12.47694600 | Mn | 26.82895500 | -3.61734200 | -12.29098600 |
| H | 29.28421500 | -0.91227400 | -11.60333700 |    |             |             |              |
| H | 22.99714200 | -1.15354100 | -13.58792900 |    |             |             |              |
| H | 22.83724600 | 1.29141700  | -13.76872000 |    |             |             |              |
| H | 24.78991100 | 2.73739700  | -13.15539000 |    |             |             |              |
| H | 26.78421900 | 1.69535500  | -12.14846100 |    |             |             |              |
| O | 26.74351900 | -4.59547100 | -14.23826600 |    |             |             |              |
| H | 25.79668600 | -4.74508600 | -14.46994400 |    |             |             |              |
| H | 27.33613500 | -5.28516800 | -14.58252100 |    |             |             |              |
| O | 24.08770000 | -4.31774200 | -14.38081100 |    |             |             |              |
| H | 23.63618000 | -4.87236600 | -13.73222300 |    |             |             |              |
| H | 24.31378400 | -3.48707900 | -13.86499100 |    |             |             |              |
| O | 21.04615200 | -1.89536500 | -14.52400200 |    |             |             |              |

### TS1-A<sub>Mn</sub> (19.6 kcal/mol)

|   |             |             |              |
|---|-------------|-------------|--------------|
| H | 20.66700000 | -6.80400000 | -16.56500000 |
| H | 16.38999500 | -5.37400400 | -12.30899000 |
| H | 24.65788200 | -6.75698200 | -19.16495400 |
| H | 29.36495500 | -8.34205800 | -18.17999700 |
| H | 35.11193700 | 4.87004700  | -6.01592800  |
| H | 32.10200200 | 7.76400700  | -10.35100500 |
| H | 33.92497300 | -0.02996500 | -10.21099600 |
| H | 31.95001500 | -4.27902200 | -6.58595000  |

|   |             |             |              |   |             |             |              |
|---|-------------|-------------|--------------|---|-------------|-------------|--------------|
| H | 23.18500500 | 1.49700000  | -4.32299500  | H | 23.65929100 | -2.79601100 | -5.30361100  |
| H | 22.41700000 | 4.62900600  | -7.60400500  | H | 24.27261800 | -2.64024600 | -8.29440100  |
| H | 22.25402000 | 6.39005000  | -15.14802800 | H | 25.40815300 | -2.45301700 | -6.95088800  |
| H | 33.53401600 | 5.46901900  | -6.68093100  | H | 25.17113800 | -4.87802800 | -8.16689300  |
| H | 30.78101200 | 8.84800200  | -10.93701100 | H | 25.32926900 | -4.79128600 | -6.40096000  |
| H | 23.93691500 | 6.31003400  | -15.82106200 | C | 23.17500000 | 4.07099400  | -8.16499800  |
| H | 23.80798700 | -0.12301100 | -3.81400100  | C | 24.47134200 | 3.93482200  | -7.38585500  |
| H | 32.79699100 | -3.33900700 | -5.29799500  | O | 24.49334600 | 3.82498900  | -6.15890400  |
| H | 32.07502700 | 0.82301700  | -17.96199300 | H | 22.78244100 | 3.06674400  | -8.35657500  |
| H | 30.43530200 | -3.27793800 | -15.73605500 | H | 23.31605600 | 4.57484700  | -9.12309500  |
| H | 31.70204300 | -4.16487700 | -14.93603800 | N | 25.60441600 | 3.91775000  | -8.13809800  |
| H | 30.41799600 | -9.05999500 | -14.20502600 | C | 26.90901300 | 3.66700900  | -7.52200400  |
| H | 20.88600300 | -5.05000400 | -16.84100400 | C | 27.88027300 | 3.79859300  | -8.70015100  |
| H | 34.15687200 | -4.71594600 | -10.10782800 | C | 27.07197200 | 3.24091800  | -9.87473900  |
| H | 23.72486300 | -8.30799000 | -7.05602900  | C | 25.66609400 | 3.79095400  | -9.61090100  |
| H | 21.59201300 | -3.72896500 | -7.32000500  | H | 26.93617400 | 2.64855600  | -7.10970900  |
| H | 27.89799800 | 0.15100200  | -17.74200300 | H | 28.11186100 | 4.85404400  | -8.87842100  |
| H | 27.15898400 | 4.34399700  | -6.69899300  | H | 28.81747400 | 3.26615500  | -8.53507100  |
| C | 29.55202100 | -8.45606200 | -13.91501800 | H | 27.46430100 | 3.53737200  | -10.84605700 |
| C | 29.04057700 | -7.65154800 | -15.09906200 | H | 27.06249400 | 2.14846300  | -9.83959200  |
| O | 28.76788700 | -6.44741100 | -15.06479000 | H | 25.53526000 | 4.77250600  | -10.08456800 |
| C | 29.81980800 | -7.57355000 | -12.69410700 | H | 24.89185600 | 3.11635800  | -9.98326500  |
| C | 28.51294000 | -7.16337300 | -11.99015500 | C | 23.37402700 | 0.46299100  | -4.63002900  |
| C | 28.80353900 | -6.07538300 | -10.96171000 | C | 24.36895100 | 0.47111000  | -5.80834500  |
| O | 29.47853700 | -6.38159500 | -9.96410200  | C | 23.80661900 | 0.50776300  | -7.21704000  |
| O | 28.37371500 | -4.88412100 | -11.21267400 | C | 22.43978300 | 0.44737400  | -7.50924400  |
| H | 28.77225800 | -9.19102000 | -13.66363700 | C | 24.70553400 | 0.51679400  | -8.29814600  |
| H | 30.46278500 | -8.09246400 | -11.97830400 | C | 21.98779500 | 0.33294800  | -8.82907000  |
| H | 30.35418900 | -6.67485800 | -13.01933200 | C | 24.26081100 | 0.43504200  | -9.61519000  |
| H | 27.77765400 | -6.81955700 | -12.71518000 | C | 22.89344400 | 0.32395700  | -9.89017500  |
| H | 28.10974300 | -8.03926900 | -11.46693200 | H | 22.42236400 | -0.01478600 | -4.87672000  |
| N | 28.93647800 | -8.36929800 | -16.23613800 | H | 25.03785800 | 1.33026600  | -5.69039300  |
| C | 28.68988300 | -7.77078900 | -17.53380900 | H | 25.00864800 | -0.41842400 | -5.75040900  |
| C | 27.23057700 | -7.97761600 | -17.94357600 | H | 21.71336800 | 0.45841900  | -6.70430500  |
| O | 26.76628700 | -9.10623200 | -18.04946800 | H | 25.77324900 | 0.57084000  | -8.10113900  |
| H | 29.06928700 | -9.36862000 | -16.20706800 | H | 20.92344200 | 0.21113100  | -9.01767100  |
| H | 28.99563500 | -6.72443300 | -17.49315800 | H | 24.97620100 | 0.45327600  | -10.42717200 |
| N | 26.51391800 | -6.83447100 | -18.11096300 | H | 22.55321400 | 0.23048500  | -10.91499900 |
| C | 25.05622900 | -6.84007300 | -18.14810600 | C | 32.20597100 | -3.27997400 | -6.21806600  |
| C | 24.49836700 | -5.71075400 | -17.28978900 | C | 30.88209600 | -2.53675400 | -5.94718200  |
| H | 26.96319200 | -5.96213300 | -17.87062900 | C | 29.89976000 | -2.72510000 | -7.06560500  |
| H | 24.73783700 | -7.81703400 | -17.77373100 | C | 30.10736900 | -3.39704700 | -8.24415800  |
| H | 23.40868300 | -5.68336300 | -17.35481100 | N | 28.57611100 | -2.27689500 | -7.02932200  |
| H | 24.76894700 | -5.83306200 | -16.24055700 | C | 28.02793600 | -2.68587000 | -8.17986000  |
| H | 24.86583300 | -4.73217000 | -17.62177200 | N | 28.91650500 | -3.35630800 | -8.93046200  |
| C | 23.25807700 | 6.03489500  | -15.04091200 | H | 32.78523800 | -2.79584100 | -7.00355200  |
| C | 23.26265600 | 4.48998300  | -15.02710800 | H | 30.43088000 | -2.89460300 | -5.01331600  |
| C | 22.41520800 | 3.83897500  | -13.96345500 | H | 31.07639200 | -1.46738600 | -5.78106400  |
| C | 22.75865800 | 3.93954300  | -12.60980300 | H | 27.72904700 | -2.95653200 | -5.70886600  |
| C | 21.30010400 | 3.05948700  | -14.29740300 | H | 30.97494600 | -3.90964400 | -8.62388000  |
| C | 22.03336800 | 3.27107600  | -11.62951400 | H | 27.02511700 | -2.48279000 | -8.51558600  |
| C | 20.55992900 | 2.38304300  | -13.32920400 | H | 28.71807600 | -3.82453000 | -9.82739300  |
| C | 20.93200500 | 2.48589900  | -11.98677700 | C | 33.48018300 | -4.18199700 | -10.78331300 |
| O | 20.19790400 | 1.80269600  | -11.06020000 | C | 33.36713100 | -2.73970200 | -10.31880300 |
| H | 23.64639500 | 6.43364600  | -14.09711600 | O | 33.14107800 | -2.39816400 | -9.16351800  |
| H | 22.93026400 | 4.13541500  | -16.01020100 | C | 32.15621400 | -4.96062100 | -10.77474500 |
| H | 24.29883500 | 4.14179700  | -14.92094000 | O | 31.97680800 | -5.53637400 | -9.50498100  |
| H | 23.62948800 | 4.51945900  | -12.31568200 | H | 33.91736100 | -4.21465500 | -11.78809100 |
| H | 21.01777100 | 2.96245500  | -15.34281200 | H | 31.31770900 | -4.29604100 | -11.03682600 |
| H | 22.33311400 | 3.33257600  | -10.59056200 | H | 32.20299200 | -5.73303900 | -11.56028600 |
| H | 19.71120100 | 1.76140100  | -13.59416900 | H | 31.06901600 | -5.91469900 | -9.50555000  |
| H | 20.64413900 | 1.87405400  | -10.20420600 | N | 33.54127800 | -1.80524600 | -11.30219600 |
| C | 20.86199300 | -5.83999100 | -16.08299300 | C | 33.30503500 | -0.40207400 | -11.03296700 |
| C | 19.84684100 | -5.63835600 | -14.96756000 | H | 33.60040900 | -2.10966600 | -12.26093800 |
| O | 19.08753800 | -6.53513300 | -14.61294500 | H | 33.54727300 | 0.17856300  | -11.92488200 |
| H | 21.86536900 | -5.87117200 | -15.64385500 | H | 32.25930000 | -0.20871700 | -10.76630700 |
| N | 19.89854600 | -4.42134500 | -14.34472500 | C | 30.70360900 | -3.79221800 | -14.83681100 |
| C | 19.19499200 | -4.19801400 | -13.09500000 | C | 30.46830000 | -2.80375000 | -13.68268100 |
| C | 18.16031700 | -3.08310300 | -13.20488300 | C | 29.02575400 | -2.29996100 | -13.69862800 |
| O | 18.41862000 | -2.00240400 | -13.76199500 | O | 28.10214900 | -3.13657800 | -13.83791000 |
| C | 20.24655300 | -3.88486700 | -12.00437200 | O | 28.82160900 | -1.03759500 | -13.55698000 |
| O | 19.68808700 | -3.68861200 | -10.70888700 | H | 30.02754700 | -4.64216800 | -14.73461700 |
| H | 20.54776500 | -3.68609700 | -14.63101800 | H | 30.60084800 | -3.29536500 | -12.71204400 |
| H | 18.70592200 | -5.14275800 | -12.85934600 | H | 31.14772100 | -1.94943700 | -13.71909400 |
| H | 20.90796200 | -4.75435500 | -11.93452000 | C | 27.87501200 | 1.06299800  | -17.13699200 |
| H | 20.84781100 | -3.02463300 | -12.32007700 | C | 29.24634600 | 1.59157300  | -16.77128000 |
| H | 19.40899100 | -2.76655500 | -10.64240000 | O | 29.40949800 | 2.67306900  | -16.20966000 |
| C | 23.90619900 | -7.35594100 | -7.56600500  | C | 27.05990300 | 0.77945900  | -15.86370000 |
| C | 22.90877100 | -6.30442800 | -7.10556400  | C | 25.67673900 | 0.28372100  | -16.18609400 |
| O | 21.73783600 | -6.60740000 | -6.86801800  | C | 24.67328600 | 1.18500000  | -16.55368900 |
| C | 23.67378600 | -7.61238200 | -9.08366900  | C | 25.35928100 | -1.07827800 | -16.12589000 |
| C | 24.03801100 | -6.44878400 | -9.94515700  | C | 23.38405700 | 0.74719400  | -16.84732400 |
| C | 25.20811800 | -6.16007100 | -10.60231900 | C | 24.07523800 | -1.53655000 | -16.41550700 |
| N | 23.24600100 | -5.32155200 | -10.12347300 | C | 23.09443800 | -0.61467100 | -16.77789400 |
| C | 23.95286300 | -4.40896500 | -10.84361700 | O | 21.82009000 | -1.10054200 | -17.02251100 |
| N | 25.14447800 | -4.89674400 | -11.14971100 | H | 27.37141700 | 1.83346200  | -17.73070000 |
| H | 24.94540100 | -7.06527700 | -7.39631900  | H | 27.59524100 | 0.04008100  | -15.26411400 |
| H | 24.27839100 | -8.46743000 | -9.39954900  | H | 27.01089800 | 1.69133800  | -15.26514900 |
| H | 22.62277500 | -7.88868700 | -9.22194200  | H | 24.89396000 | 2.24830400  | -16.58692900 |
| H | 22.33654000 | -5.16673000 | -9.70878400  | H | 26.11282800 | -1.78732500 | -15.79236000 |
| H | 26.08720300 | -6.77548400 | -10.70513900 | H | 22.60577300 | 1.46180900  | -17.10638300 |
| H | 23.58953600 | -3.43217400 | -11.12365800 | H | 23.81621100 | -2.58407300 | -16.30480300 |
| N | 23.32414600 | -5.00676500 | -7.10407300  | H | 21.25883200 | -0.36933900 | -17.31325100 |
| C | 22.40696400 | -3.96407100 | -6.62799300  | N | 30.27069700 | 0.76061300  | -17.08829500 |
| C | 23.31847500 | -2.76771600 | -6.34408400  | C | 31.68296000 | 1.10897700  | -16.98000900 |
| C | 24.51262500 | -2.98046600 | -7.28158800  | C | 32.36866200 | 0.33964600  | -15.84813700 |
| C | 24.70560800 | -4.50008700 | -7.25568300  | C | 31.82006300 | 0.71060100  | -14.46936600 |
| H | 21.90175700 | -4.32521500 | -5.72578700  | C | 32.24987100 | 2.06234800  | -13.93649600 |
| H | 22.81409800 | -1.81924500 | -6.51070600  | O | 33.13730600 | 2.68445600  | -14.68212800 |

|   |             |             |              |
|---|-------------|-------------|--------------|
| O | 31.83503700 | 2.49850000  | -12.86064900 |
| H | 30.04310800 | -0.10527200 | -17.55213600 |
| H | 31.75831900 | 2.18721900  | -16.84011400 |
| H | 32.21573100 | -0.73498900 | -16.00962900 |
| H | 33.44625300 | 0.52457400  | -15.88533000 |
| H | 30.72689700 | 0.65928500  | -14.44619500 |
| H | 32.15125800 | -0.01661400 | -13.71938300 |
| C | 27.20848600 | -1.01478600 | -11.23218200 |
| O | 27.11401500 | -2.23903300 | -10.94342500 |
| O | 27.89460700 | -0.16854100 | -10.60422500 |
| C | 26.45712900 | -0.49157100 | -12.47235800 |
| C | 25.26868700 | -1.24413500 | -12.89698300 |
| O | 25.23660000 | -2.52699300 | -12.93838400 |
| C | 24.09445700 | -0.51464100 | -13.26585000 |
| C | 24.09667500 | 0.85402900  | -13.31680000 |
| C | 25.26181400 | 1.60738400  | -12.99715400 |
| C | 26.37699900 | 0.95855700  | -12.55617200 |
| H | 27.56383900 | -0.80351900 | -13.20799700 |
| H | 23.20399600 | -1.07884700 | -13.52579200 |
| H | 23.19213900 | 1.37112700  | -13.61131400 |
| H | 25.25050700 | 2.68817800  | -13.06525400 |
| H | 27.24646600 | 1.52635300  | -12.24970400 |
| O | 26.31902000 | -5.45305500 | -13.81614800 |
| H | 25.47827900 | -5.13560600 | -14.22168500 |
| H | 27.02659000 | -5.49552300 | -14.48116700 |
| O | 23.94394800 | -4.25368600 | -14.45404600 |
| H | 23.23963400 | -4.61459000 | -13.90113800 |
| H | 24.27811900 | -3.46849200 | -13.94325700 |
| O | 21.13084600 | -1.89053800 | -14.38962700 |
| H | 21.29396200 | -1.61724900 | -15.30858900 |
| H | 20.18307500 | -1.70866900 | -14.21201400 |
| C | 34.22903400 | 4.62591900  | -6.61615800  |
| C | 33.58244800 | 3.36590800  | -6.01925600  |
| C | 32.23794400 | 2.97163600  | -6.64637900  |
| C | 31.95149900 | 1.47185000  | -6.43949700  |
| N | 30.57799000 | 1.05732900  | -6.71295100  |
| C | 30.04927300 | 0.93570300  | -7.95277500  |
| N | 30.71145200 | 1.40944200  | -9.00818100  |
| N | 28.84361100 | 0.38039200  | -8.08967300  |
| H | 34.57313100 | 4.42222100  | -7.63784300  |
| H | 34.29087200 | 2.53430600  | -6.13378900  |
| H | 33.44471300 | 3.49378900  | -4.93863000  |
| H | 31.42000300 | 3.55978000  | -6.21621500  |
| H | 32.25951700 | 3.22505700  | -7.71379600  |
| H | 32.64758900 | 0.86853400  | -7.03805900  |
| H | 32.14227800 | 1.21806000  | -5.39369100  |
| H | 30.07086400 | 0.59365800  | -5.97300800  |
| H | 31.54459400 | 1.94833300  | -8.85048800  |
| H | 30.25963000 | 1.50207200  | -9.95606500  |
| H | 28.58663700 | -0.33571600 | -7.40310700  |
| C | 28.52181700 | 0.14069500  | -9.04376000  |
| C | 31.09198200 | 7.81100600  | -10.76997100 |
| C | 30.07986600 | 7.04627000  | -9.89691600  |
| C | 28.77211600 | 6.82648700  | -10.59753900 |
| C | 27.57503300 | 7.45128100  | -10.35270100 |
| C | 28.55100200 | 5.93703800  | -11.71637600 |
| C | 27.19031500 | 6.08101100  | -12.10599900 |
| C | 29.36369300 | 5.02334700  | -12.41049500 |
| N | 26.61822500 | 7.00808500  | -11.25375400 |
| C | 26.63994800 | 5.35971400  | -13.17008700 |
| C | 28.82360800 | 4.30615300  | -13.47014600 |
| C | 27.47793800 | 4.48028100  | -13.84976500 |
| H | 31.14882700 | 7.33993900  | -11.75770400 |
| H | 30.50929100 | 6.07199400  | -9.62581400  |
| H | 29.91497400 | 7.58169100  | -8.95466700  |
| H | 27.32196900 | 8.18343300  | -9.59900200  |
| H | 25.66147600 | 7.31741400  | -11.28443300 |
| H | 30.39921200 | 4.86404400  | -12.12633300 |
| H | 25.60515200 | 5.49506100  | -13.46639600 |
| H | 29.43459500 | 3.60989900  | -14.03045100 |
| H | 27.10339600 | 3.92352500  | -14.70237300 |
| O | 29.62151000 | 1.72682200  | -11.40287200 |
| H | 30.31476200 | 1.82730600  | -12.08363300 |
| H | 29.11909800 | 0.89867900  | -11.51940500 |
| N | 16.95297400 | -3.32451500 | -12.65435600 |
| C | 16.59800600 | -4.44999800 | -11.75901400 |
| C | 15.33365900 | -3.93598300 | -11.05216900 |
| C | 14.68674000 | -3.01390700 | -12.09686500 |
| C | 15.89183400 | -2.30800900 | -12.72541900 |
| H | 17.41271300 | -4.64297900 | -11.05935500 |
| H | 14.68317600 | -4.75185200 | -10.72873300 |
| H | 15.61353200 | -3.35705400 | -10.16504200 |
| H | 14.16493400 | -3.60985000 | -12.85373000 |
| H | 13.96921600 | -2.31055600 | -11.66774600 |
| H | 15.73928200 | -1.99912600 | -13.76207200 |
| H | 16.18906000 | -1.41681900 | -12.15832300 |
| C | 29.55095600 | -2.94392500 | -1.16211700  |
| C | 28.26245400 | -3.75115000 | -1.35229400  |
| C | 28.02958400 | -4.24085300 | -2.78262800  |
| C | 27.85917900 | -3.14159900 | -3.81809600  |
| O | 28.05895700 | -1.95407600 | -3.62629400  |
| O | 27.50232500 | -3.64117900 | -5.00586600  |
| H | 29.54037900 | -2.10784300 | -1.86535500  |
| H | 28.25408300 | -4.61985800 | -0.68260000  |
| H | 27.41355700 | -3.12308700 | -1.05651800  |
| H | 28.87150000 | -4.85702600 | -3.12705800  |
| H | 27.15052700 | -4.89302100 | -2.84242900  |
| H | 30.46538800 | -3.51016300 | -1.36786100  |
| H | 29.56609700 | -2.49731900 | -0.16236400  |

|    |             |             |              |
|----|-------------|-------------|--------------|
| C  | 34.86197400 | 8.00000400  | -10.31598700 |
| C  | 35.21949600 | 6.49855300  | -10.32041800 |
| C  | 34.99222800 | 5.86203700  | -11.65328500 |
| C  | 34.08232700 | 4.93333100  | -12.09855300 |
| N  | 35.71385300 | 6.21534000  | -12.78469800 |
| C  | 35.23133700 | 5.50489900  | -13.84047500 |
| N  | 34.24446000 | 4.72231700  | -13.45330900 |
| H  | 35.57069500 | 8.58862000  | -10.90771000 |
| H  | 36.25596900 | 6.34725200  | -9.99125400  |
| H  | 34.58853800 | 5.97508400  | -9.59534000  |
| H  | 36.46186000 | 6.89129900  | -12.81828900 |
| H  | 33.32225400 | 4.39729700  | -11.54976000 |
| H  | 35.62373400 | 5.58714600  | -14.84321300 |
| H  | 33.48259100 | 3.53341700  | -14.21871200 |
| H  | 34.87101600 | 8.38159200  | -9.28968000  |
| H  | 33.87105400 | 8.09549400  | -10.77199400 |
| Mn | 26.81427400 | -3.89694900 | -12.25763300 |

# Int-A<sub>Mn</sub> (11.6 kcal/mol)

|   |             |             |              |
|---|-------------|-------------|--------------|
| H | 20.66700500 | -6.80400200 | -16.56499900 |
| H | 16.38999600 | -5.37400000 | -12.30899600 |
| H | 24.65787900 | -6.75699900 | -19.16495400 |
| H | 29.36494100 | -8.34206200 | -18.18000900 |
| H | 35.11197400 | 4.87001500  | -6.01596900  |
| H | 32.10200300 | 7.76399200  | -10.35100900 |
| H | 33.92497200 | -0.02996100 | -10.21099700 |
| H | 31.95001600 | -4.27902900 | -6.58593200  |
| H | 23.18499900 | 1.49700000  | -4.32299900  |
| H | 22.41699100 | 4.62900000  | -7.60401100  |
| H | 22.25402100 | 6.39005200  | -15.14803500 |
| H | 33.53402000 | 5.46902000  | -6.68095000  |
| H | 30.78101000 | 8.84800000  | -10.93701700 |
| H | 23.93691400 | 6.31003100  | -15.82106400 |
| H | 23.80798300 | -0.12301200 | -3.81400000  |
| H | 32.79698100 | -3.33902300 | -5.29799000  |
| H | 32.07484700 | 0.82280600  | -17.96200300 |
| H | 30.43534500 | -3.27793200 | -15.73606400 |
| H | 31.70205400 | -4.16484000 | -14.93606100 |
| H | 30.41802600 | -9.05994100 | -14.20504800 |
| H | 20.88601000 | -5.04999900 | -16.84099900 |
| H | 34.15687000 | -4.71594100 | -10.10782200 |
| H | 23.72493900 | -8.30799000 | -7.05600300  |
| H | 21.59201100 | -3.72897400 | -7.32000500  |
| H | 27.89798700 | 0.15103000  | -17.74204600 |
| H | 27.15898900 | 4.34399500  | -6.69899300  |
| C | 29.55198500 | -8.45613500 | -13.91499600 |
| C | 29.03606600 | -7.65678900 | -15.10059800 |
| O | 28.75001200 | -6.45500000 | -15.06751300 |
| C | 29.82670100 | -7.56190000 | -12.70297200 |
| C | 28.52332000 | -7.12631800 | -12.00701000 |
| C | 28.82458800 | -6.02984400 | -10.98975100 |
| O | 29.46638500 | -6.33926400 | -9.97256000  |
| O | 28.43897100 | -4.82886900 | -11.27223200 |
| H | 28.77314100 | -9.18873500 | -13.65444900 |
| H | 30.46107800 | -8.08073600 | -11.97940700 |
| H | 30.37344900 | -6.67405900 | -13.03719800 |
| H | 27.79525900 | -6.78037700 | -12.73815300 |
| H | 28.10858300 | -7.99095700 | -11.47441500 |
| N | 28.94376200 | -8.37197300 | -16.23869400 |
| C | 28.68990800 | -7.77078800 | -17.53379400 |
| C | 27.22863000 | -7.97924100 | -17.93500000 |
| O | 26.76099000 | -9.10780000 | -18.02457500 |
| H | 29.08970800 | -9.36951700 | -16.21282500 |
| H | 28.99520700 | -6.72433300 | -17.49371400 |
| N | 26.51347200 | -6.83661500 | -18.11182500 |
| C | 25.05622700 | -6.84004900 | -18.14810800 |
| C | 24.49761900 | -5.70893700 | -17.29229500 |
| H | 26.96708600 | -5.96076000 | -17.89379500 |
| H | 24.73725600 | -7.81628200 | -17.77273600 |
| H | 23.40822300 | -5.67947400 | -17.36055200 |
| H | 24.76215700 | -5.83189800 | -16.24157300 |
| H | 24.86911300 | -4.73174100 | -17.62463900 |
| C | 23.25807500 | 6.03489600  | -15.04090100 |
| C | 23.24582900 | 4.49138700  | -15.00492000 |
| C | 22.36251600 | 3.88402600  | -13.94380700 |
| C | 22.67284400 | 4.02103600  | -12.58506000 |
| C | 21.23568100 | 3.12296800  | -14.28113100 |
| C | 21.90683200 | 3.40240100  | -11.60263800 |
| C | 20.45390900 | 2.49751300  | -13.31091000 |
| C | 20.79483100 | 2.63334400  | -11.96283000 |
| O | 20.02249800 | 1.99544400  | -11.03543100 |
| H | 23.64590700 | 6.44015600  | -14.09941500 |
| H | 22.92525100 | 4.12289400  | -15.98673800 |
| H | 24.27369400 | 4.12847200  | -14.87168800 |
| H | 23.54776100 | 4.59264900  | -12.28623900 |
| H | 20.97572000 | 3.00007000  | -15.32959600 |
| H | 22.18128100 | 3.49183600  | -10.55871000 |
| H | 19.59603300 | 1.88988300  | -13.57859000 |
| H | 20.45558900 | 2.06833300  | -10.17267400 |
| C | 20.86197900 | -5.83999600 | -16.08300200 |
| C | 19.83729200 | -5.62999800 | -14.97782700 |
| O | 19.04428500 | -6.50778100 | -14.65024200 |
| H | 21.86182000 | -5.85987900 | -15.63605400 |
| N | 19.91366900 | -4.42450700 | -14.33439200 |
| C | 19.19499600 | -4.19801200 | -13.09499900 |
| C | 18.15440600 | -3.08828700 | -13.21589000 |
| O | 18.40380500 | -2.01166500 | -13.78592900 |



|   |             |             |              |   |             |             |              |
|---|-------------|-------------|--------------|---|-------------|-------------|--------------|
| C | 20.22943400 | -3.88035800 | -11.98872300 | O | 29.13599000 | -0.89803200 | -13.53751000 |
| O | 19.64737100 | -3.66205900 | -10.70765900 | H | 30.02518000 | -4.64140200 | -14.74321000 |
| H | 20.59576900 | -3.71145200 | -14.59291500 | H | 30.58474100 | -3.43525800 | -12.70434900 |
| H | 18.70281400 | -5.14250300 | -12.86395600 | H | 31.32161100 | -2.09414000 | -13.59425600 |
| H | 20.88257000 | -4.75390400 | -11.89483500 | C | 27.87496700 | 1.06293600  | -17.13697200 |
| H | 20.84336800 | -3.02953900 | -12.30425400 | C | 29.24908200 | 1.61868400  | -16.81970500 |
| H | 19.37200000 | -2.73773600 | -10.66028600 | O | 29.41152500 | 2.73993400  | -16.34160400 |
| C | 23.90609400 | -7.35597300 | -7.56602800  | C | 27.12586800 | 0.76546300  | -15.81920600 |
| C | 22.89917800 | -6.30492600 | -7.12483000  | C | 25.73647900 | 0.25042900  | -16.08123200 |
| O | 21.72164600 | -6.60244700 | -6.91678900  | C | 24.71463500 | 1.13819700  | -16.43523300 |
| C | 23.73904000 | -7.59596000 | -9.09540000  | C | 25.43743900 | -1.11587200 | -16.01332300 |
| C | 24.11915500 | -6.42289600 | -9.94374700  | C | 23.43228600 | 0.68238300  | -16.72817200 |
| C | 25.27754800 | -6.13859600 | -10.62762100 | C | 24.15815300 | -1.59119800 | -16.30451000 |
| N | 23.32797800 | -5.29397600 | -10.11384200 | C | 23.16574600 | -0.68524400 | -16.67425800 |
| C | 24.02500900 | -4.38639800 | -10.85059500 | O | 21.90473700 | -1.18994300 | -16.94725500 |
| N | 25.20912200 | -4.87687000 | -11.18420400 | H | 27.33090000 | 1.82307800  | -17.70615700 |
| H | 24.93743100 | -7.05983200 | -7.35866200  | H | 27.70349900 | 0.04417200  | -15.23324100 |
| H | 24.36512200 | -8.44139500 | -9.39474100  | H | 27.08602200 | 1.68372300  | -15.22829100 |
| H | 22.69773300 | -7.88296800 | -9.28036900  | H | 24.92098900 | 2.20429800  | -16.47124100 |
| H | 22.43082500 | -5.13218300 | -9.67594600  | H | 26.20719600 | -1.81201500 | -15.68929200 |
| H | 26.15087400 | -6.75914400 | -10.74540600 | H | 22.64250200 | 1.38584900  | -16.98285500 |
| H | 23.65485700 | -3.40960300 | -11.12055000 | H | 23.91343600 | -2.64452200 | -16.21725100 |
| N | 23.32336800 | -5.00921200 | -7.10131500  | H | 21.34811600 | -0.47260700 | -17.27877400 |
| C | 22.40698000 | -3.96404900 | -6.62800000  | N | 30.27080000 | 0.76109400  | -17.06915300 |
| C | 23.31570500 | -2.76191500 | -6.35214400  | C | 31.68323600 | 1.10926900  | -16.97997200 |
| C | 24.52756100 | -2.99129400 | -7.26357000  | C | 32.38518900 | 0.35781300  | -15.84648600 |
| C | 24.71121800 | -4.51123600 | -7.22081900  | C | 31.84758800 | 0.74685600  | -14.46951200 |
| H | 21.90230500 | -4.31993400 | -5.72324500  | C | 32.28172000 | 2.10245700  | -13.95190900 |
| H | 22.81357100 | -1.81697800 | -6.54796900  | O | 33.17155300 | 2.71347900  | -14.70388200 |
| H | 23.63739500 | -2.76676600 | -5.30539800  | O | 31.86496600 | 2.55711200  | -12.88209100 |
| H | 24.31116000 | -2.65903200 | -8.28434800  | H | 30.04052800 | -0.14442200 | -17.44868100 |
| H | 25.41984600 | -2.46622500 | -6.91963900  | H | 31.75296000 | 2.18942600  | -16.85082100 |
| H | 25.19752200 | -4.89837400 | -8.11719600  | H | 32.23301100 | -0.71968700 | -15.98856700 |
| H | 25.31209800 | -4.79955600 | -6.34888700  | H | 33.46164600 | 0.54487600  | -15.90189500 |
| C | 23.17501600 | 4.07100000  | -8.16499400  | H | 30.75588300 | 0.68957300  | -14.44707600 |
| C | 24.46963300 | 3.92976700  | -7.38413900  | H | 32.17109300 | 0.02301700  | -13.71348600 |
| O | 24.49091500 | 3.81528400  | -6.15775200  | C | 26.86155700 | -0.96752200 | -11.10087800 |
| H | 22.78069700 | 3.07011700  | -8.36650800  | O | 26.97913400 | -2.21175500 | -10.93893700 |
| H | 23.32265000 | 4.58237400  | -9.11824900  | O | 27.14674400 | -0.07325200 | -10.28411500 |
| N | 25.60315000 | 3.91636100  | -8.13606700  | C | 26.30807700 | -0.48574300 | -12.50321400 |
| C | 26.90900300 | 3.66701100  | -7.52200400  | C | 25.07089000 | -1.23507800 | -12.89331700 |
| C | 27.87836600 | 3.81478900  | -8.70016300  | O | 25.09414900 | -2.49477300 | -12.98963400 |
| C | 27.07337300 | 3.26463200  | -9.88124100  | C | 23.86944100 | -0.49482000 | -13.15692700 |
| C | 25.66299900 | 3.80136400  | -9.60966000  | C | 23.90096900 | 0.86905800  | -13.18605200 |
| H | 26.94160900 | 2.64634300  | -7.11608000  | C | 25.09636200 | 1.62852300  | -12.91902000 |
| H | 28.10486800 | 4.87349300  | -8.86553700  | C | 26.23832500 | 0.99190700  | -12.58301600 |
| H | 28.81889600 | 3.28675200  | -8.53746800  | H | 27.13605000 | -0.81899300 | -13.15880500 |
| H | 27.45724600 | 3.58222300  | -10.84994700 | H | 22.96250200 | -1.04120200 | -13.39819900 |
| H | 27.06234200 | 2.17343400  | -9.86719400  | H | 22.99190700 | 1.40432800  | -13.43040600 |
| H | 25.51957800 | 4.78539900  | -10.07518300 | H | 25.06403200 | 2.70916300  | -12.98112900 |
| H | 24.89427300 | 3.12125500  | -9.98402700  | H | 27.15442700 | 1.52792600  | -12.35936500 |
| C | 23.37403600 | 0.46299500  | -4.63001900  | O | 26.39897100 | -5.34795800 | -13.86739700 |
| C | 24.31749000 | 0.46920200  | -5.84341900  | H | 25.53448900 | -5.10484800 | -14.26900700 |
| C | 23.67262600 | 0.53529600  | -7.21551500  | H | 27.08809900 | -5.47871300 | -14.54072400 |
| C | 22.28809200 | 0.54801500  | -7.42384900  | O | 23.86160400 | -4.43698500 | -14.35491400 |
| C | 24.50294500 | 0.51193400  | -8.34836300  | H | 23.40196200 | -4.93493500 | -13.66636600 |
| C | 21.74993200 | 0.47527100  | -8.71414100  | H | 24.11296600 | -3.59289300 | -13.90821900 |
| C | 23.97283900 | 0.46934800  | -9.63430900  | O | 21.10755000 | -1.86067600 | -14.32707400 |
| C | 22.58877000 | 0.43018600  | -9.82793300  | H | 21.29224400 | -1.63405800 | -15.25436800 |
| H | 22.41464100 | -0.01369500 | -4.85058000  | H | 20.14526300 | -1.71735100 | -14.19045800 |
| H | 25.00219700 | 1.31902200  | -5.75049100  | C | 34.22898400 | 4.62595300  | -6.61609200  |
| H | 24.94639000 | -0.42896300 | -5.82935900  | C | 33.56714200 | 3.32805600  | -6.13257900  |
| H | 21.61285500 | 0.58934900  | -6.57696900  | C | 32.29757700 | 2.93613200  | -6.91044800  |
| H | 25.58224600 | 0.50353300  | -8.22845600  | C | 31.95498400 | 1.44126800  | -6.72459100  |
| H | 20.67034500 | 0.41829600  | -8.83757000  | N | 30.54668800 | 1.09652100  | -6.90928400  |
| H | 24.64579800 | 0.46525600  | -10.47901300 | C | 29.92497300 | 0.90431200  | -8.09660000  |
| H | 22.18138800 | 0.36058800  | -10.82997700 | N | 30.48897600 | 1.32776600  | -9.22736600  |
| C | 32.20598200 | -3.27995300 | -6.21809000  | N | 28.72265100 | 0.33193800  | -8.09627800  |
| C | 30.88150300 | -2.53150800 | -5.95782700  | H | 34.59789400 | 4.47265200  | -7.64006400  |
| C | 29.90672700 | -2.71966200 | -7.08387000  | H | 34.30298300 | 2.51697400  | -6.21545500  |
| C | 30.14268200 | -3.33164600 | -8.28905600  | H | 33.31680400 | 3.40003100  | -5.06684200  |
| N | 28.56333200 | -2.33739300 | -7.02906600  | H | 31.44791100 | 3.54392300  | -6.57995400  |
| C | 28.02999200 | -2.72816800 | -8.19221500  | H | 32.44430300 | 3.16375600  | -7.97574500  |
| N | 28.94882300 | -3.32050700 | -8.97299300  | H | 32.57166100 | 0.81806000  | -7.38416000  |
| H | 32.79068200 | -2.79940700 | -7.00202200  | H | 32.20091800 | 1.14537500  | -5.70128900  |
| H | 30.42002000 | -2.88771900 | -5.02870200  | C | 30.03542000 | 0.77488100  | -6.10072200  |
| H | 31.07480700 | -1.46117400 | -5.79159300  | H | 31.28333500 | 1.94363600  | -9.18014200  |
| H | 27.75253400 | -3.03203800 | -5.70843300  | H | 30.06421100 | 1.16942900  | -10.17273100 |
| H | 31.03048900 | -3.79780200 | -8.67932600  | H | 28.54062400 | -0.38703400 | -7.39023400  |
| H | 27.01812100 | -2.55990300 | -8.51958900  | H | 28.22878500 | 0.15798600  | -8.98831400  |
| H | 28.76479600 | -3.78472600 | -9.87528900  | C | 31.09198200 | 7.81102300  | -10.76996100 |
| C | 33.48018800 | -4.18199700 | -10.78332200 | C | 30.07818300 | 7.03972900  | -9.90579600  |
| C | 33.37974300 | -2.73862100 | -10.31723300 | C | 28.77766100 | 6.81105800  | -10.61749400 |
| O | 33.17911700 | -2.39633500 | -9.15682500  | C | 27.57898400 | 7.43870400  | -10.38792300 |
| C | 32.15551800 | -4.95732400 | -10.76429700 | C | 28.56360300 | 5.90832300  | -11.72745300 |
| O | 31.97777300 | -5.51930100 | -9.48759400  | C | 27.20446000 | 6.04673800  | -12.12531200 |
| H | 33.91210700 | -4.21724300 | -11.78997500 | C | 29.37903100 | 4.98462700  | -12.40705600 |
| H | 31.31904000 | -4.29434500 | -11.03141600 | N | 26.62781600 | 6.98474900  | -11.28905100 |
| H | 32.19969200 | -5.73751300 | -11.54242200 | C | 26.65747700 | 5.30954100  | -13.18026800 |
| H | 31.06371500 | -5.87936300 | -9.47808100  | C | 28.84157500 | 4.25073000  | -13.45750700 |
| N | 33.54209000 | -1.80506900 | -11.30286900 | C | 27.49636500 | 4.41920100  | -13.84363500 |
| C | 33.30503800 | -0.40208200 | -11.03296400 | H | 31.15311000 | 7.34357900  | -11.75946300 |
| H | 33.55415600 | -2.11135200 | -12.26314800 | H | 30.51184900 | 6.06844500  | -9.63085600  |
| H | 33.55461000 | 0.17705600  | -11.92422500 | H | 29.90106400 | 7.57320200  | -8.96472900  |
| H | 32.25659300 | -0.20560900 | -10.78000800 | H | 27.32151300 | 8.17956700  | -9.64433100  |
| C | 30.70353800 | -3.79225600 | -14.83676700 | H | 25.67100400 | 7.29292100  | -11.32859100 |
| C | 30.53652400 | -2.85505300 | -13.63165800 | H | 30.41715700 | 4.83663500  | -12.12536400 |
| C | 29.18033200 | -2.14997800 | -13.64530900 | H | 25.62391400 | 5.44255500  | -13.48259200 |
| O | 28.14716700 | -2.88766800 | -13.79388700 | H | 29.45694900 | 3.55205800  | -14.01045800 |

|    |             |             |              |
|----|-------------|-------------|--------------|
| H  | 27.12584800 | 3.85507400  | -14.69290600 |
| O  | 29.67458300 | 1.17391700  | -11.78180800 |
| H  | 30.36971600 | 1.69194300  | -12.23473900 |
| H  | 29.53634000 | 0.36503900  | -12.31626100 |
| N  | 16.95055800 | -3.32722000 | -12.65813700 |
| C  | 16.59800500 | -4.45000100 | -11.75900700 |
| C  | 15.33357900 | -3.93537600 | -11.05321800 |
| C  | 14.68289000 | -3.02106000 | -12.10236600 |
| C  | 15.88515900 | -2.31566600 | -12.73709700 |
| H  | 17.41344300 | -4.63999500 | -11.05977400 |
| H  | 14.68564100 | -4.75103000 | -10.72419400 |
| H  | 15.61352200 | -3.35078600 | -10.16981300 |
| H  | 14.16152100 | -3.62284800 | -12.85488600 |
| H  | 13.96416100 | -2.31694900 | -11.67650900 |
| H  | 15.73105000 | -2.01573100 | -13.77613200 |
| H  | 16.17920700 | -1.41879400 | -12.17735500 |
| C  | 29.55095100 | -2.94392100 | -1.16213100  |
| C  | 28.26690900 | -3.76223400 | -1.33902300  |
| C  | 28.03788600 | -4.27886700 | -2.75995600  |
| C  | 27.85269700 | -3.19583900 | -3.80991400  |
| O  | 28.00430600 | -2.00082300 | -3.62166400  |
| O  | 27.53996000 | -3.71809700 | -5.00001900  |
| H  | 29.53253600 | -2.11127200 | -1.86922200  |
| H  | 28.26526800 | -4.61866800 | -0.65357600  |
| H  | 27.41401100 | -3.13446700 | -1.05470800  |
| H  | 28.88498500 | -4.89228400 | -3.09580200  |
| H  | 27.16486400 | -4.94048700 | -2.80756500  |
| H  | 30.46539100 | -3.51016300 | -1.36784900  |
| H  | 29.56610100 | -2.49732400 | -0.16236200  |
| C  | 34.86202700 | 7.99999200  | -10.31605000 |
| C  | 35.22730200 | 6.50120000  | -10.32514200 |
| C  | 35.01665700 | 5.87436500  | -11.66488600 |
| C  | 34.10908600 | 4.95259700  | -12.12799100 |
| N  | 35.75168100 | 6.23553900  | -12.78517200 |
| C  | 35.27842700 | 5.53559600  | -13.85230000 |
| N  | 34.28501000 | 4.75307100  | -13.48261200 |
| H  | 35.56831300 | 8.59263700  | -10.90687600 |
| H  | 36.26139100 | 6.35389900  | -9.98683000  |
| H  | 34.59229500 | 5.96929800  | -9.60979800  |
| H  | 36.50261100 | 6.90880200  | -12.80462000 |
| H  | 33.34213600 | 4.41293300  | -11.59261700 |
| H  | 35.68221800 | 5.62497200  | -14.84989500 |
| H  | 33.51957100 | 3.56528600  | -14.25038200 |
| H  | 34.87097000 | 8.38157800  | -9.28967500  |
| H  | 33.87103800 | 8.09549500  | -10.77195900 |
| Mn | 26.91263300 | -3.81617800 | -12.33785500 |

### TS2-A<sub>Mn</sub> (17.1 kcal/mol)

|   |             |             |              |
|---|-------------|-------------|--------------|
| H | 20.66700200 | -6.80400000 | -16.56500100 |
| H | 16.38999300 | -5.37399800 | -12.30899800 |
| H | 24.65787700 | -6.75700100 | -19.16495300 |
| H | 29.36494000 | -8.34206200 | -18.18001100 |
| H | 35.11196500 | 4.87002900  | -6.01596100  |
| H | 32.10200600 | 7.76397700  | -10.35101800 |
| H | 33.92493500 | -0.02996000 | -10.21096900 |
| H | 31.95001000 | -4.27902800 | -6.58593000  |
| H | 23.18502600 | 1.49700000  | -4.32298200  |
| H | 22.41698300 | 4.62898700  | -7.60400900  |
| H | 22.25402100 | 6.39004400  | -15.14806500 |
| H | 33.53401500 | 5.46901600  | -6.68094800  |
| H | 30.78100200 | 8.84800000  | -10.93700100 |
| H | 23.93691700 | 6.31003800  | -15.82105900 |
| H | 23.80798500 | -0.12299900 | -3.81399200  |
| H | 32.79696300 | -3.33901300 | -5.29797800  |
| H | 32.07482800 | 0.82282400  | -17.96201600 |
| H | 30.43548700 | -3.27791400 | -15.73609600 |
| H | 31.70207400 | -4.16477700 | -14.93609900 |
| H | 30.41801500 | -9.05995300 | -14.20505600 |
| H | 20.88601400 | -5.04999800 | -16.84099800 |
| H | 34.15684400 | -4.71595200 | -10.10780500 |
| H | 23.72491800 | -8.30799100 | -7.05601200  |
| H | 21.59193700 | -3.72899300 | -7.31992400  |
| H | 27.89799500 | 0.15102000  | -17.74203100 |
| H | 27.15896500 | 4.34403000  | -6.69901500  |
| C | 29.55197700 | -8.45612000 | -13.91500500 |
| C | 29.04109500 | -7.65663400 | -15.10343200 |
| O | 28.76603200 | -6.45223200 | -15.07409200 |
| C | 29.80810500 | -7.55823200 | -12.69930800 |
| C | 28.49078900 | -7.10170500 | -12.04288400 |
| C | 28.75057200 | -6.01375900 | -11.00268400 |
| O | 29.46342300 | -6.30127900 | -10.02591200 |
| O | 28.23387700 | -4.84742300 | -11.20273200 |
| H | 28.77182200 | -9.19013000 | -13.66169300 |
| H | 30.41602100 | -8.08046300 | -11.95606800 |
| H | 30.37573600 | -6.67985900 | -13.02349000 |
| H | 27.78764300 | -6.74907600 | -12.79436000 |
| H | 28.04518200 | -7.96297300 | -11.52817200 |
| N | 28.93879900 | -8.37438200 | -16.23901700 |
| C | 28.68992100 | -7.77078600 | -17.53381500 |
| C | 27.22976200 | -7.97721100 | -17.93926000 |
| O | 26.76397400 | -9.10603600 | -18.03688000 |
| H | 29.07232300 | -9.37365700 | -16.21229600 |
| H | 28.99692900 | -6.72505700 | -17.49039500 |
| N | 26.51332400 | -6.83460700 | -18.10918900 |
| C | 25.05622800 | -6.84004500 | -18.14810900 |
| C | 24.49185900 | -5.71601800 | -17.29017100 |
| H | 26.96583900 | -5.95881300 | -17.88876300 |

|   |             |             |              |
|---|-------------|-------------|--------------|
| H | 24.73924200 | -7.81845900 | -17.77644500 |
| H | 23.40367200 | -5.68094300 | -17.37181700 |
| H | 24.74146200 | -5.85267400 | -16.23888100 |
| H | 24.87063900 | -4.73588900 | -17.60469900 |
| C | 23.25807900 | 6.03490600  | -15.04089600 |
| C | 23.24072100 | 4.49154400  | -14.98758100 |
| C | 22.34148700 | 3.90178600  | -13.92894000 |
| C | 22.63597100 | 4.05590900  | -12.56871100 |
| C | 21.21249500 | 3.14539300  | -14.26791300 |
| C | 21.85319400 | 3.45820800  | -11.58671300 |
| C | 20.41442000 | 2.53968800  | -13.29838700 |
| C | 20.74194200 | 2.69003600  | -11.94879100 |
| O | 19.95821800 | 2.06536200  | -11.01995700 |
| H | 23.64497100 | 6.44754400  | -14.10191100 |
| H | 22.92923600 | 4.11270100  | -15.96821200 |
| H | 24.26361400 | 4.12277400  | -14.83623300 |
| H | 23.51145100 | 4.62546200  | -12.26767500 |
| H | 20.96346400 | 3.00962900  | -15.31739900 |
| H | 22.11601700 | 3.56052100  | -10.54091700 |
| H | 19.55572400 | 1.93402600  | -13.56800700 |
| H | 20.38675500 | 2.14468600  | -10.15579600 |
| C | 20.86198200 | -5.84000000 | -16.08300000 |
| C | 19.84636700 | -5.63842500 | -14.96771100 |
| O | 19.08319800 | -6.53387000 | -14.61634400 |
| H | 21.86497100 | -5.86507800 | -15.64340200 |
| N | 19.90225900 | -4.42393200 | -14.34187000 |
| C | 19.19499500 | -4.19801100 | -13.09500200 |
| C | 18.15152300 | -3.08942200 | -13.21502600 |
| O | 18.39615800 | -2.01284500 | -13.78632000 |
| C | 20.24109700 | -3.87209600 | -12.00335100 |
| O | 19.67698300 | -3.67598700 | -10.70981300 |
| H | 20.55341600 | -3.68922600 | -14.62726200 |
| H | 18.70951400 | -5.14366700 | -12.85521600 |
| H | 20.90975600 | -4.73552200 | -11.92942600 |
| H | 20.83576500 | -3.00809700 | -12.32060300 |
| H | 19.40049300 | -2.75325900 | -10.64327900 |
| C | 23.90611200 | -7.35598900 | -7.56599300  |
| C | 22.90842800 | -6.30631500 | -7.10179400  |
| O | 21.74131500 | -6.61015300 | -6.85005400  |
| C | 23.69561900 | -7.59306800 | -9.09156600  |
| C | 24.05615700 | -6.42989400 | -9.96285700  |
| C | 25.19716800 | -6.16792900 | -10.68286800 |
| N | 23.26286600 | -5.30305400 | -10.14545300 |
| C | 23.94119900 | -4.42096700 | -10.92998300 |
| N | 25.11577400 | -4.92424500 | -11.27478300 |
| H | 24.94310700 | -7.06426300 | -7.38204900  |
| H | 24.30759400 | -8.44341000 | -9.40622800  |
| H | 22.64818100 | -7.87641700 | -9.24485700  |
| H | 22.37037600 | -5.13010100 | -9.70236600  |
| H | 26.06690600 | -6.79257700 | -10.80431900 |
| H | 23.57263800 | -3.44977700 | -11.22340100 |
| N | 23.32189200 | -5.00654300 | -7.10928900  |
| C | 22.40708500 | -3.96401700 | -6.62811700  |
| C | 23.31405500 | -2.76018100 | -6.36053200  |
| C | 24.51037100 | -2.98102800 | -7.29385400  |
| C | 24.70314900 | -4.50104700 | -7.26147900  |
| H | 21.90716400 | -4.32162600 | -5.72188800  |
| H | 22.80543500 | -1.81597700 | -6.54348300  |
| H | 23.65397500 | -2.76932000 | -5.31952800  |
| H | 24.27721100 | -2.64499700 | -8.30967400  |
| H | 25.40350800 | -2.45198500 | -6.95844500  |
| H | 25.16863700 | -4.88277800 | -8.17155100  |
| H | 25.32637800 | -4.78976100 | -6.40533100  |
| C | 23.17498000 | 4.07103400  | -8.16494700  |
| C | 24.46853300 | 3.92764000  | -7.38309200  |
| O | 24.49046600 | 3.80810300  | -6.15711900  |
| H | 22.77999300 | 3.07173300  | -8.37116400  |
| H | 23.32495600 | 4.58531800  | -9.11610900  |
| N | 25.60237200 | 3.91823300  | -8.13477300  |
| C | 26.90897800 | 3.66698800  | -7.52189400  |
| C | 27.87665100 | 3.80801100  | -8.70291500  |
| C | 27.06488700 | 3.25986800  | -9.88054000  |
| C | 25.66131300 | 3.81099400  | -9.60889000  |
| H | 26.93924300 | 2.64742600  | -7.11302400  |
| H | 28.10677400 | 4.86514000  | -8.87288300  |
| H | 28.81593800 | 3.27659800  | -8.54343400  |
| H | 27.45043500 | 3.56069100  | -10.85324000 |
| H | 27.04106800 | 2.16980800  | -9.85547600  |
| H | 25.53215100 | 4.79910000  | -10.06914300 |
| H | 24.88511500 | 3.14336400  | -9.98915800  |
| C | 23.37398900 | 0.46301200  | -4.63002700  |
| C | 24.30762700 | 0.46853200  | -5.84956800  |
| C | 23.65020700 | 0.54991400  | -7.21532200  |
| C | 22.26472800 | 0.56042800  | -7.41407600  |
| C | 24.47282600 | 0.54664000  | -8.35406300  |
| C | 21.71932100 | 0.50741700  | -8.70268900  |
| C | 23.93705700 | 0.51824600  | -9.63840000  |
| C | 22.55102600 | 0.47966500  | -9.82156400  |
| H | 22.41303100 | -0.01300100 | -4.84575500  |
| H | 25.00048500 | 1.31174600  | -5.75728100  |
| H | 24.92790400 | -0.43582300 | -5.84617800  |
| H | 21.59457400 | 0.58818400  | -6.56263100  |
| H | 25.55175400 | 0.54716500  | -8.23084900  |
| H | 20.63903300 | 0.45525600  | -8.82173900  |
| H | 24.59256500 | 0.52621800  | -10.49839400 |
| H | 22.13989500 | 0.42527500  | -10.82265900 |
| C | 32.20599300 | -3.27994400 | -6.21813600  |
| C | 30.88735000 | -2.52101300 | -5.97059000  |
| C | 29.90515500 | -2.71589300 | -7.09009600  |



|   |             |             |              |   |             |             |              |
|---|-------------|-------------|--------------|---|-------------|-------------|--------------|
| H | 20.88601800 | -5.04999900 | -16.84099900 | C | 27.88018900 | 3.79157200  | -8.70004500  |
| H | 34.15685400 | -4.71596100 | -10.10782200 | C | 27.07056000 | 3.22163200  | -9.86745600  |
| H | 23.72474700 | -8.30797500 | -7.05604300  | C | 25.66532500 | 3.77701900  | -9.61122800  |
| H | 21.59193800 | -3.72899700 | -7.31992600  | H | 26.93287900 | 2.64951400  | -7.10402700  |
| H | 27.89798800 | 0.15102300  | -17.74203500 | H | 28.10730600 | 4.84590800  | -8.88925200  |
| C | 27.15899900 | 4.34412500  | -6.69910300  | H | 28.82065500 | 3.26639100  | -8.52603900  |
| C | 29.55196900 | -8.45610100 | -13.91499300 | H | 27.45600300 | 3.49961600  | -10.84713000 |
| C | 29.04179400 | -7.65409500 | -15.10230800 | H | 27.04514000 | 2.12971100  | -9.81228700  |
| O | 28.76937500 | -6.44934800 | -15.07054700 | H | 25.54043000 | 4.75463200  | -10.09337100 |
| C | 29.80991700 | -7.56195200 | -12.69749900 | H | 24.89250500 | 3.10097700  | -9.98221500  |
| C | 28.49404800 | -7.10134200 | -12.04212600 | C | 23.37399500 | 0.46301300  | -4.63004400  |
| C | 28.76022500 | -6.03580900 | -10.98199600 | C | 24.34693400 | 0.47088700  | -5.82233600  |
| O | 29.46919100 | -6.34084400 | -10.00847300 | C | 23.74433600 | 0.53011100  | -7.21308500  |
| O | 28.24841200 | -4.86277100 | -11.16278900 | C | 22.36815100 | 0.53457200  | -7.46310900  |
| H | 28.77141700 | -9.19006100 | -13.66287600 | C | 24.60927300 | 0.50088200  | -8.32066600  |
| H | 30.41335600 | -8.08905800 | -11.95399200 | C | 21.87361100 | 0.45440400  | -8.77069300  |
| H | 30.38215300 | -6.68529000 | -13.01827000 | C | 24.12657800 | 0.44198800  | -9.62544000  |
| H | 27.79949900 | -6.72850600 | -12.79209100 | C | 22.74643500 | 0.40399000  | -9.85662400  |
| H | 28.03319900 | -7.96516700 | -11.54598100 | H | 22.41972800 | -0.01475300 | -4.86730700  |
| N | 28.93811100 | -8.37197200 | -16.23790100 | H | 25.02681500 | 1.32252900  | -5.71039700  |
| C | 28.68991800 | -7.77078600 | -17.53383100 | H | 24.97771300 | -0.42592500 | -5.78691700  |
| C | 27.22971600 | -7.97622300 | -17.93974300 | H | 21.66710800 | 0.57684400  | -6.63718000  |
| O | 26.76402600 | -9.10505200 | -18.03796700 | H | 25.68341000 | 0.50659000  | -8.14715200  |
| H | 29.06777000 | -9.37173000 | -16.20959000 | H | 20.79899200 | 0.39313100  | -8.92951000  |
| H | 28.99713000 | -6.72497900 | -17.49168200 | H | 24.81272300 | 0.40560200  | -10.46263500 |
| N | 26.51351000 | -6.83330700 | -18.11025700 | H | 22.37713200 | 0.33278100  | -10.87257900 |
| C | 25.05625900 | -6.84002000 | -18.14810000 | C | 32.20600700 | -3.27994800 | -6.21815200  |
| C | 24.49126900 | -5.72835500 | -17.27076700 | C | 30.90237200 | -2.48022800 | -6.00861400  |
| H | 26.96526900 | -5.95760800 | -17.88778300 | C | 29.93236900 | -2.65249400 | -7.14696500  |
| H | 24.74352300 | -7.82288600 | -17.78410400 | C | 30.10454400 | -3.40966000 | -8.27992500  |
| H | 23.40374500 | -5.68724300 | -17.36319000 | N | 28.63660500 | -2.12371600 | -7.14986500  |
| H | 24.73762500 | -5.89354000 | -16.22062300 | C | 28.06670700 | -2.58815300 | -8.27225700  |
| H | 24.87721700 | -4.74326600 | -17.55630900 | N | 28.91904800 | -3.35271700 | -8.97502500  |
| C | 23.25808300 | 6.03490100  | -15.04089700 | H | 32.81342400 | -2.82581500 | -7.00201900  |
| C | 23.24256300 | 4.49230300  | -14.99906500 | H | 30.40763000 | -2.79255800 | -5.08088500  |
| C | 22.35737200 | 3.88374100  | -13.94009600 | H | 31.13647100 | -1.41532200 | -5.86399600  |
| C | 22.66253500 | 4.02611400  | -12.58145400 | H | 27.78186000 | -2.83574200 | -5.73963900  |
| C | 21.24115700 | 3.10828600  | -14.27796400 | H | 30.94390500 | -3.99129000 | -8.62433200  |
| C | 21.90310400 | 3.39846200  | -11.60060400 | H | 27.05745600 | -2.37614500 | -8.59568900  |
| C | 20.46790100 | 2.47009300  | -13.30955000 | H | 28.70061200 | -3.88393000 | -9.84024100  |
| C | 20.80769700 | 2.60857500  | -11.96206400 | C | 33.48018500 | -4.18197300 | -10.78342300 |
| O | 20.04872600 | 1.95397600  | -11.03259800 | C | 33.37591700 | -2.73623700 | -10.32162100 |
| H | 23.64531300 | 6.44442100  | -14.10070200 | O | 33.14451900 | -2.39259800 | -9.16744000  |
| H | 22.92379600 | 4.12468400  | -15.98093300 | C | 32.14733000 | -4.94659900 | -10.77063400 |
| H | 24.26645200 | 4.12192100  | -14.86173200 | O | 31.98781800 | -5.56389400 | -9.51433300  |
| H | 23.53156700 | 4.60581400  | -12.28211100 | H | 33.91615400 | -4.21803900 | -11.78817800 |
| H | 20.98457300 | 2.98256300  | -15.32687300 | H | 31.31040200 | -4.26593000 | -10.98981700 |
| H | 22.17536100 | 3.49000100  | -10.55626400 | H | 32.16769300 | -5.69555400 | -11.57870500 |
| H | 19.61948400 | 1.84915400  | -13.57759500 | H | 31.08775100 | -5.95596000 | -9.52676900  |
| H | 20.48402300 | 2.03807600  | -10.17257800 | N | 33.57199000 | -1.80219900 | -11.30314000 |
| C | 20.86199500 | -5.83999100 | -16.08300000 | C | 33.30509100 | -0.40208800 | -11.03297700 |
| C | 19.87006300 | -5.66313200 | -14.93937400 | H | 33.56494900 | -2.10905200 | -12.26354900 |
| O | 19.23834000 | -6.61574600 | -14.49167400 | H | 33.54153900 | 0.18289000  | -11.92422700 |
| H | 21.86765400 | -5.89036500 | -15.64810500 | H | 32.25425900 | -0.23981200 | -10.77540200 |
| N | 19.80417600 | -4.40770800 | -14.40183300 | C | 30.70337600 | -3.79255900 | -14.83650000 |
| C | 19.19499500 | -4.19801400 | -13.09500000 | C | 30.72860200 | -2.83179200 | -13.64436900 |
| C | 18.18303400 | -3.06083400 | -13.14364100 | C | 29.38804600 | -2.46401900 | -13.01338600 |
| O | 18.46805500 | -1.95660500 | -13.63701500 | O | 28.35015900 | -3.02428000 | -13.49285500 |
| C | 20.32361500 | -3.93201300 | -12.07373300 | O | 29.40673800 | -1.67188500 | -12.03776100 |
| O | 19.86060000 | -3.82354500 | -10.72869600 | H | 30.01216800 | -4.61821400 | -14.67449300 |
| H | 20.39664900 | -3.64703000 | -14.74432600 | H | 31.31431700 | -3.26369800 | -12.82551900 |
| H | 18.70899200 | -5.13965300 | -12.84292800 | H | 31.24214400 | -1.89918000 | -13.90137500 |
| H | 20.99611000 | -4.79476900 | -12.10876900 | C | 27.87496400 | 1.06294000  | -17.13697400 |
| H | 20.89298400 | -3.04682000 | -12.37803500 | C | 29.24836500 | 1.57983700  | -16.76424600 |
| H | 19.63142400 | -2.89987000 | -10.56618800 | O | 29.41945800 | 2.64705900  | -16.17695100 |
| C | 23.90636100 | -7.35592400 | -7.56602600  | C | 27.05889900 | 0.79608700  | -15.85298100 |
| C | 22.91049600 | -6.30692700 | -7.09572900  | C | 25.62534400 | 0.45175900  | -16.15162300 |
| O | 21.74713300 | -6.61374700 | -6.83111300  | C | 24.71896500 | 1.45674600  | -16.50312300 |
| C | 23.68574500 | -7.59253800 | -9.08885700  | C | 25.16362500 | -0.86573900 | -16.08706100 |
| C | 24.07963100 | -6.43039200 | -9.94294100  | C | 23.38457900 | 1.16251800  | -16.77056200 |
| C | 25.27805200 | -6.13929600 | -10.54628200 | C | 23.83491400 | -1.18105700 | -16.35566400 |
| N | 23.28471800 | -5.31618300 | -10.18564000 | C | 22.94959700 | -0.15896600 | -16.68470100 |
| C | 24.01285200 | -4.41486600 | -10.89770600 | O | 21.62307500 | -0.50656600 | -16.89000500 |
| N | 25.22716500 | -4.89070900 | -11.13037200 | H | 27.37735400 | 1.83957700  | -17.72691400 |
| H | 24.94506800 | -7.06659900 | -7.38851700  | H | 27.52209700 | -0.01468300 | -15.28129900 |
| H | 24.27825500 | -8.45655600 | -9.40399700  | H | 27.10714500 | 1.68348800  | -15.21830500 |
| H | 22.63235300 | -7.85052700 | -9.24332800  | H | 25.05404200 | 2.48920400  | -16.54725600 |
| H | 22.34512200 | -5.16593300 | -9.84084700  | H | 25.83630800 | -1.65701100 | -15.77017200 |
| H | 26.16866700 | -6.74483200 | -10.58241100 | H | 22.68471100 | 1.95553700  | -17.02275600 |
| H | 23.65964000 | -3.45366900 | -11.23821300 | H | 23.48758000 | -2.20006300 | -16.23952100 |
| N | 23.32112400 | -5.00693900 | -7.10887200  | H | 21.10401900 | 0.29994400  | -17.00617800 |
| C | 22.40707300 | -3.96402200 | -6.62809800  | N | 30.27284400 | 0.75235700  | -17.09338900 |
| C | 23.31728900 | -2.76059500 | -6.36375800  | C | 31.68319500 | 1.10918400  | -16.98000300 |
| C | 24.50451500 | -2.98193100 | -7.30902100  | C | 32.36414700 | 0.35424900  | -15.83598000 |
| C | 24.70048800 | -4.50022600 | -7.26645400  | C | 31.76970900 | 0.72197600  | -14.47575300 |
| H | 21.90861500 | -4.31950000 | -5.72021100  | C | 32.16363700 | 2.07891100  | -13.92763900 |
| H | 22.80896700 | -1.81516200 | -6.53970400  | O | 33.05909200 | 2.71351000  | -14.64892000 |
| H | 23.66609100 | -2.77362000 | -5.32554700  | O | 31.70569300 | 2.50108000  | -12.86268600 |
| H | 24.25149300 | -2.65579900 | -8.32334500  | H | 30.04803300 | -0.09696400 | -17.58837500 |
| H | 25.40244200 | -2.44777500 | -6.99359300  | H | 31.75126200 | 2.18872500  | -16.84552200 |
| H | 25.16680200 | -4.88816800 | -8.17250200  | H | 32.23673300 | -0.72353000 | -15.99610500 |
| H | 25.32522400 | -4.78039700 | -6.40805500  | H | 33.43782300 | 0.56276800  | -15.84649900 |
| C | 23.17498100 | 4.07099000  | -8.16489800  | H | 30.67625700 | 0.68044400  | -14.50652700 |
| C | 24.47114400 | 3.93519800  | -7.38569400  | H | 32.06790700 | -0.00274700 | -13.71069900 |
| O | 24.49781200 | 3.83048900  | -6.15872900  | C | 26.43161400 | -0.37080300 | -12.44452700 |
| H | 22.78397900 | 3.06815400  | -8.36332700  | C | 25.28936900 | -1.14798300 | -12.72480900 |
| H | 23.32075700 | 4.57861500  | -9.12036000  | O | 25.32046400 | -2.48770600 | -12.69766500 |
| N | 25.60522400 | 3.91610900  | -8.13927100  | C | 24.08796500 | -0.48211800 | -13.04801500 |
| C | 26.90892700 | 3.66685700  | -7.52182300  | C | 24.04285300 | 0.90726900  | -13.10648200 |

|   |             |             |              |
|---|-------------|-------------|--------------|
| C | 25.18243300 | 1.67304500  | -12.84003900 |
| C | 26.37464700 | 1.02195800  | -12.51293400 |
| H | 27.36487800 | -0.86728400 | -12.20150800 |
| H | 23.20546100 | -1.06663800 | -13.29304500 |
| H | 23.11319100 | 1.39295700  | -13.37495300 |
| H | 25.14669800 | 2.75494400  | -12.89111300 |
| H | 27.27999000 | 1.58884400  | -12.32110200 |
| O | 26.33012900 | -5.32448200 | -14.00056800 |
| H | 25.53600200 | -4.92010200 | -14.43444400 |
| H | 27.05787600 | -5.45433000 | -14.63216900 |
| O | 24.21618600 | -3.82886100 | -14.62599300 |
| H | 23.29243200 | -3.99521500 | -14.40174000 |
| H | 24.54547100 | -3.19593800 | -13.91116300 |
| O | 21.11548500 | -1.94595700 | -14.50066100 |
| H | 21.24365500 | -1.44711000 | -15.32650300 |
| H | 20.21017500 | -1.72436300 | -14.19357800 |
| C | 34.22901500 | 4.62593700  | -6.61619400  |
| C | 33.55854400 | 3.35169500  | -6.07870900  |
| C | 32.24764600 | 2.98286200  | -6.79491600  |
| C | 31.93180100 | 1.48164500  | -6.65463800  |
| N | 30.57871500 | 1.09120200  | -7.05563100  |
| C | 30.16909900 | 0.98940700  | -8.33515400  |
| N | 30.87874800 | 1.49414500  | -9.33644300  |
| N | 28.98427700 | 0.41341000  | -8.59463700  |
| H | 34.58544100 | 4.44524200  | -7.63896600  |
| H | 34.27035200 | 2.52120100  | -6.17771400  |
| H | 33.36101300 | 3.45185000  | -5.00470900  |
| H | 31.41115200 | 3.56779400  | -6.39715400  |
| H | 32.33202500 | 3.26335200  | -7.85280700  |
| H | 32.66398000 | 0.88450200  | -7.21426300  |
| H | 32.03140600 | 1.19196400  | -5.60575100  |
| H | 29.99481600 | 0.63244300  | -6.36981100  |
| H | 31.72313800 | 2.00897000  | -9.16442200  |
| H | 30.52593100 | 1.31578200  | -10.30983500 |
| H | 28.68001800 | -0.33898500 | -7.96704100  |
| H | 28.74480200 | 0.30273400  | -9.57394900  |
| C | 31.09198700 | 7.81101700  | -10.76997300 |
| C | 30.08583000 | 7.05220000  | -9.88505300  |
| C | 28.77314900 | 6.82673200  | -10.57319400 |
| C | 27.57980400 | 7.45988100  | -10.32980800 |
| C | 28.54164500 | 5.92099200  | -11.67637600 |
| C | 27.17876900 | 6.06357400  | -12.05810300 |
| C | 29.34555400 | 4.99180000  | -12.36195200 |
| N | 26.61622700 | 7.00678400  | -11.21768900 |
| C | 26.61553100 | 5.32379500  | -13.10241200 |
| C | 28.79192300 | 4.25642500  | -13.40291200 |
| C | 27.44203900 | 4.42745300  | -13.77146500 |
| H | 31.14385600 | 7.33551400  | -11.75568200 |
| H | 30.51812300 | 6.08003800  | -9.60983900  |
| H | 29.92868900 | 7.59440800  | -8.94535700  |
| H | 27.33477500 | 8.20489700  | -9.58614100  |
| H | 25.65902300 | 7.31538500  | -11.24473400 |
| H | 30.38618200 | 4.84011700  | -12.09163300 |
| H | 25.57677300 | 5.45125600  | -13.38759200 |
| H | 29.39721000 | 3.55331000  | -13.96099400 |
| H | 27.05118000 | 3.84951500  | -14.60150000 |
| O | 29.70951800 | 0.93433800  | -11.64003300 |
| H | 30.24139500 | 1.46412500  | -12.26495000 |
| H | 29.71280400 | -0.01848300 | -11.91386100 |
| N | 16.95978700 | -3.31514300 | -12.63596300 |
| C | 16.59800600 | -4.44999500 | -11.75901600 |
| C | 15.33373500 | -3.94182400 | -11.04524800 |
| C | 14.69993700 | -2.98813900 | -12.06939000 |
| C | 15.91541500 | -2.27983900 | -12.67380000 |
| H | 17.41018700 | -4.65433900 | -11.05825700 |
| H | 14.67461000 | -4.75957600 | -10.74488200 |
| H | 15.61371500 | -3.38697700 | -10.14300000 |
| H | 14.17562500 | -3.55948200 | -12.84333800 |
| H | 13.98779800 | -2.28840700 | -11.62563300 |
| H | 15.76881600 | -1.93477300 | -13.69987100 |
| H | 16.22605800 | -1.41283000 | -12.07726700 |
| C | 29.55095200 | -2.94387300 | -1.16218400  |
| C | 28.26056900 | -3.73694500 | -1.39090600  |
| C | 28.05565700 | -4.19408200 | -2.83823000  |
| C | 27.90146000 | -3.07162200 | -3.85152700  |
| O | 28.06114900 | -1.88561000 | -3.62583600  |
| O | 27.60085900 | -3.55059800 | -5.06732400  |
| H | 29.55693700 | -2.09946700 | -1.85686500  |
| H | 28.23223500 | -4.62090200 | -0.74237300  |
| H | 27.40990500 | -3.10953900 | -1.09979900  |
| H | 28.90304100 | -4.80369600 | -3.18019800  |
| H | 27.17727400 | -4.84376400 | -2.92879400  |
| H | 30.46538500 | -3.51017900 | -1.36783100  |
| H | 29.56610200 | -2.49735100 | -0.16235000  |
| C | 34.86200800 | 8.00000800  | -10.31602900 |
| C | 35.21857500 | 6.49870000  | -10.31673200 |
| C | 34.96587000 | 5.86036800  | -11.64305300 |
| C | 34.02603400 | 4.95567300  | -12.07430200 |
| N | 35.67771500 | 6.19713700  | -12.78522900 |
| C | 35.16093100 | 5.50068000  | -13.83389200 |
| N | 34.16081000 | 4.74318800  | -13.43113400 |
| H | 35.57116400 | 8.58703200  | -10.90854400 |
| H | 36.25994300 | 6.34707300  | -10.00407400 |
| H | 34.59831200 | 5.97973400  | -9.57928500  |
| H | 36.44142500 | 6.85473500  | -12.83011500 |
| H | 33.26133400 | 4.44015100  | -11.51251600 |
| H | 35.53953500 | 5.57285800  | -14.84263500 |
| H | 33.39091000 | 3.56744100  | -14.18213000 |
| H | 34.87098300 | 8.38157600  | -9.28967400  |

|    |             |             |              |
|----|-------------|-------------|--------------|
| H  | 33.87104400 | 8.09549200  | -10.77197300 |
| Mn | 26.81028900 | -3.89030700 | -12.40232100 |

The transition states and intermediates involved in the reaction pathway with **Mode-A** for the Zn-enzyme of SDC.

#### E:S-A<sub>Zn</sub> (0.0 kcal/mol)

|   |             |             |              |
|---|-------------|-------------|--------------|
| H | 20.66699700 | -6.80400000 | -16.56499900 |
| H | 16.39000000 | -5.37400000 | -12.30900100 |
| H | 24.65797500 | -6.75700000 | -19.16499000 |
| H | 29.36482300 | -8.34219900 | -18.18000800 |
| H | 35.11201800 | 4.86999000  | -6.01602200  |
| H | 32.10199800 | 7.76399100  | -10.35099600 |
| H | 33.92502100 | -0.03000400 | -10.21101500 |
| H | 31.94996900 | -4.27902700 | -6.58590600  |
| H | 23.18498600 | 1.49700100  | -4.32301100  |
| H | 22.41699300 | 4.62898300  | -7.60399200  |
| H | 22.25401000 | 6.39002300  | -15.14801400 |
| H | 33.53400000 | 5.46899900  | -6.68101600  |
| H | 30.78099800 | 8.84799900  | -10.93700600 |
| H | 23.93698200 | 6.31001500  | -15.82101000 |
| H | 23.80798500 | -0.12302100 | -3.81400700  |
| H | 32.79691800 | -3.33918000 | -5.29795900  |
| H | 32.07500800 | 0.82299800  | -17.96199700 |
| H | 30.43501800 | -3.27794000 | -15.73597200 |
| H | 31.70202200 | -4.16493000 | -14.93604300 |
| H | 30.41826900 | -9.05964100 | -14.20494400 |
| H | 20.88599300 | -5.04999900 | -16.84099900 |
| H | 34.15692800 | -4.71601300 | -10.10793800 |
| H | 23.72497400 | -8.30798900 | -7.05598800  |
| H | 21.59198300 | -3.72901300 | -7.31998500  |
| H | 27.89800600 | 0.15099700  | -17.74199500 |
| H | 27.15899000 | 4.34402600  | -6.69901900  |
| C | 29.55190000 | -8.45625600 | -13.91512900 |
| C | 29.39154600 | -7.66804100 | -15.20025100 |
| O | 29.92027600 | -6.57271600 | -15.37960400 |
| C | 29.73998400 | -7.54812900 | -12.70507300 |
| C | 28.51062500 | -6.65577400 | -12.48779600 |
| C | 28.59879000 | -5.80220100 | -11.22681300 |
| O | 29.34704800 | -6.15038100 | -10.29806100 |
| O | 27.85239500 | -4.75078300 | -11.16551200 |
| H | 28.71105700 | -9.14628400 | -13.77575400 |
| H | 29.92927100 | -8.13391600 | -11.80285700 |
| H | 30.61624500 | -6.91487500 | -12.86932900 |
| H | 28.34040700 | -5.99962500 | -13.34420000 |
| H | 27.60361300 | -7.27173400 | -12.39810700 |
| N | 28.74362600 | -8.31635700 | -16.19518900 |
| C | 28.69019000 | -7.77098900 | -17.53409500 |
| C | 27.24201500 | -7.95902700 | -17.98673700 |
| O | 26.76879900 | -9.08805700 | -18.07984800 |
| H | 28.29771600 | -9.21022500 | -16.04694500 |
| H | 29.02378600 | -6.73420800 | -17.48332900 |
| N | 26.51607500 | -6.82258900 | -18.14523500 |
| C | 25.05595600 | -6.83996200 | -18.14803800 |
| C | 24.51244700 | -5.71008700 | -17.27501300 |
| H | 26.96991600 | -5.94261900 | -17.94764600 |
| H | 24.75338500 | -7.81959200 | -17.76964200 |
| H | 23.42072600 | -5.71867800 | -17.27661600 |
| H | 24.85510200 | -5.80652700 | -16.24085900 |
| H | 24.83013500 | -4.72926300 | -17.65059000 |
| C | 23.25799700 | 6.03501700  | -15.04100200 |
| C | 23.18264600 | 4.49786600  | -14.99338000 |
| C | 22.25559100 | 3.96721900  | -13.92752800 |
| C | 22.57794600 | 4.09478000  | -12.57126100 |
| C | 21.07631300 | 3.28617600  | -14.25462800 |
| C | 21.78323800 | 3.52716900  | -11.58250500 |
| C | 20.26543900 | 2.71078500  | -13.27716400 |
| C | 20.63038600 | 2.81806500  | -11.93295700 |
| O | 19.84035800 | 2.21219100  | -10.99685400 |
| H | 23.64609400 | 6.43529300  | -14.09785300 |
| H | 22.84595200 | 4.13368800  | -15.97129700 |
| H | 24.18626200 | 4.07971400  | -14.84991200 |
| H | 23.48941700 | 4.60916400  | -12.27928700 |
| H | 20.80134900 | 3.17808100  | -15.30121200 |
| H | 22.07161500 | 3.60058000  | -10.54092200 |
| H | 19.36756400 | 2.16015000  | -13.53698800 |
| H | 20.28781600 | 2.26444200  | -10.14025600 |
| C | 20.86200900 | -5.84000300 | -16.08300700 |
| C | 19.88805900 | -5.68954100 | -14.91777000 |
| O | 19.38268200 | -6.67245300 | -14.38565900 |
| H | 21.86443200 | -5.87899500 | -15.63944400 |
| N | 19.69028200 | -4.41453000 | -14.45652500 |
| C | 19.19499200 | -4.19800000 | -13.09498600 |
| C | 18.19790000 | -3.05322000 | -13.11190300 |
| O | 18.50003400 | -1.94635500 | -13.59275500 |
| C | 20.40883600 | -3.94643300 | -12.17376700 |
| O | 20.10074200 | -4.05595800 | -10.78078900 |
| H | 20.24210300 | -3.65425100 | -14.85049700 |
| H | 18.73097200 | -5.13778900 | -12.79935700 |
| H | 21.14694700 | -4.71886900 | -12.39960900 |
| H | 20.86456400 | -2.97829400 | -12.40754200 |

|   |             |             |              |    |             |             |              |
|---|-------------|-------------|--------------|----|-------------|-------------|--------------|
| H | 19.86483600 | -3.18114000 | -10.44878000 | O  | 29.41534600 | 2.64882900  | -16.18321500 |
| C | 23.90601600 | -7.35601600 | -7.56596900  | C  | 27.04288400 | 0.79406000  | -15.86171600 |
| C | 22.91197800 | -6.30156000 | -7.10190500  | C  | 25.62407200 | 0.41365000  | -16.18989500 |
| O | 21.73932100 | -6.60368200 | -6.86903100  | C  | 24.71399300 | 1.38783300  | -16.61315100 |
| C | 23.63700700 | -7.62194100 | -9.07712300  | C  | 25.18145300 | -0.90897400 | -16.10080200 |
| C | 23.91362200 | -6.43412800 | -9.93701900  | C  | 23.40087200 | 1.05688900  | -16.93520600 |
| C | 25.08824100 | -6.01581200 | -10.50940700 | C  | 23.87510600 | -1.26318700 | -16.42275700 |
| N | 23.01436100 | -5.40194700 | -10.17380100 | C  | 22.98814900 | -0.27160700 | -16.83953600 |
| C | 23.65682600 | -4.42095800 | -10.85245100 | O  | 21.68485500 | -0.65009200 | -17.11762600 |
| N | 24.91764200 | -4.76721400 | -11.06973500 | H  | 27.38558300 | 1.84172900  | -17.73036800 |
| H | 24.94807600 | -7.06591100 | -7.41633400  | H  | 27.51514800 | -0.00264600 | -15.27614300 |
| H | 24.26894800 | -8.44884400 | -9.41425900  | H  | 27.05973500 | 1.68906500  | -15.23522600 |
| H | 22.59561100 | -7.94350800 | -9.18142700  | H  | 25.02866600 | 2.42595500  | -16.67138600 |
| H | 22.04343700 | -5.35337000 | -9.88556600  | H  | 25.85985900 | -1.67420200 | -15.73422200 |
| H | 26.04532200 | -6.51058500 | -10.52158100 | H  | 22.69821800 | 1.82949900  | -17.23962800 |
| H | 23.20888300 | -3.49820600 | -11.17987000 | H  | 23.53801300 | -2.28547400 | -16.30870500 |
| N | 23.32818900 | -5.00568900 | -7.09033800  | H  | 21.18276000 | 0.13024400  | -17.38707500 |
| C | 22.40699700 | -3.96397300 | -6.62798700  | N  | 30.27373900 | 0.73793800  | -17.06769200 |
| C | 23.30727000 | -2.75309700 | -6.36667300  | C  | 31.68298700 | 1.10899900  | -16.97999300 |
| C | 24.50301400 | -2.97522200 | -7.29990100  | C  | 32.39691000 | 0.40304300  | -15.82807300 |
| C | 24.70492800 | -4.49348000 | -7.25262500  | C  | 31.85870700 | 0.86047500  | -14.47303800 |
| H | 21.90378400 | -4.31305800 | -5.71988500  | C  | 32.29389200 | 2.24569400  | -14.02866000 |
| H | 22.79310000 | -1.81250700 | -6.55501600  | O  | 33.25957500 | 2.76696900  | -14.75758500 |
| H | 23.64786600 | -2.75358000 | -5.32572500  | O  | 31.81365300 | 2.79890000  | -13.03773000 |
| H | 24.26316100 | -2.65279100 | -8.31862200  | H  | 30.05003000 | -0.11129700 | -17.56341900 |
| H | 25.39467500 | -2.43860200 | -6.97363200  | H  | 31.73703000 | 2.19292600  | -16.86953500 |
| H | 25.16738500 | -4.88016500 | -8.16082600  | H  | 32.25004900 | -0.67997400 | -15.92591500 |
| H | 25.33302800 | -4.76949000 | -6.39561600  | H  | 33.47143300 | 0.59501200  | -15.89337000 |
| C | 23.17500300 | 4.07102800  | -8.16500500  | H  | 30.76651900 | 0.83805500  | -14.45658500 |
| C | 24.46980200 | 3.92955500  | -7.38550200  | H  | 32.16334500 | 0.17955100  | -13.67221600 |
| O | 24.49471000 | 3.81478000  | -6.15941700  | C  | 27.03800000 | -0.69886900 | -11.37198700 |
| H | 22.77982200 | 3.07263800  | -8.37178100  | O  | 27.89653900 | 0.13050200  | -10.95207900 |
| H | 23.32449500 | 4.58461200  | -9.11694600  | O  | 27.11473500 | -1.94303900 | -11.01905500 |
| N | 25.60464100 | 3.91709300  | -8.13792400  | C  | 25.94595200 | -0.20947000 | -12.22938400 |
| C | 26.90901600 | 3.66696200  | -7.52197900  | C  | 24.84794900 | -1.01988800 | -12.64833700 |
| C | 27.88308800 | 3.80196800  | -8.69657900  | O  | 24.81825800 | -2.32694100 | -12.53586100 |
| C | 27.07440400 | 3.25011300  | -9.87311900  | C  | 23.71837900 | -0.35472400 | -13.19689000 |
| C | 25.66781600 | 3.80028100  | -9.61075900  | C  | 23.71483300 | 1.00841600  | -13.40766000 |
| H | 26.93623900 | 2.64815700  | -7.10913500  | C  | 24.84422600 | 1.78546100  | -13.09627000 |
| H | 28.11616100 | 4.85784700  | -8.86970300  | C  | 25.93213500 | 1.17439700  | -12.50945800 |
| H | 28.81974000 | 3.26795800  | -8.52902400  | H  | 28.64541100 | -2.21758000 | -11.23325400 |
| H | 27.46066300 | 3.55641100  | -10.84471200 | H  | 22.85871200 | -0.95056100 | -13.48385000 |
| H | 27.06333000 | 2.15782900  | -9.84594200  | H  | 22.83615500 | 1.47462300  | -13.83330000 |
| H | 25.54130900 | 4.78510800  | -10.07784000 | H  | 24.86068300 | 2.85001700  | -13.28093500 |
| H | 24.89329600 | 3.13148700  | -9.99164300  | H  | 26.79495200 | 1.75778100  | -12.21696400 |
| C | 23.37403200 | 0.46302100  | -4.62998300  | Zn | 26.38529200 | -3.59079800 | -12.07154700 |
| C | 24.28805400 | 0.46784600  | -5.86308600  | O  | 26.09003800 | -4.46172300 | -14.07064500 |
| C | 23.60290200 | 0.57626200  | -7.21417100  | H  | 25.18988700 | -4.22018500 | -14.38458200 |
| C | 22.21300400 | 0.60402100  | -7.38133800  | H  | 26.74403200 | -3.95044000 | -14.56912300 |
| C | 24.39791800 | 0.59188100  | -8.37286500  | O  | 23.38942500 | -3.76330800 | -14.21011700 |
| C | 21.63546200 | 0.58744700  | -8.65733700  | H  | 22.62093600 | -3.26425700 | -14.52948400 |
| C | 23.83029800 | 0.60118600  | -9.64381500  | H  | 23.79673200 | -3.15859000 | -13.53070800 |
| C | 22.44005400 | 0.57827400  | -9.79560200  | O  | 21.04910500 | -1.95398900 | -14.72514600 |
| H | 22.41042600 | -0.01258600 | -4.83581400  | H  | 21.10352500 | -1.45789000 | -15.56121300 |
| H | 24.99394800 | 1.30061600  | -5.77432200  | H  | 20.17949100 | -1.74776200 | -14.31418100 |
| H | 24.89539400 | -0.44467900 | -5.88098700  | C  | 34.22899800 | 4.62602600  | -6.61595300  |
| H | 21.56334000 | 0.62136500  | -6.51410100  | C  | 33.56569700 | 3.35529000  | -6.06513700  |
| H | 25.48096900 | 0.58537700  | -8.27255400  | C  | 32.24713300 | 2.98131100  | -6.75975100  |
| H | 20.55166700 | 0.55474200  | -8.75075900  | C  | 31.92890900 | 1.48401700  | -6.59016900  |
| H | 24.46380800 | 0.61030300  | -10.51894300 | N  | 30.56422700 | 1.09834400  | -6.94138900  |
| H | 22.00999700 | 0.55038000  | -10.79031600 | C  | 30.11055100 | 0.94230200  | -8.20746900  |
| C | 32.20612400 | -3.27977400 | -6.21810500  | N  | 30.80076000 | 1.44117400  | -9.23252500  |
| C | 30.88917400 | -2.51133300 | -5.98639200  | N  | 28.93468800 | 0.34779300  | -8.39795700  |
| C | 29.88287200 | -2.74436700 | -7.07900100  | H  | 34.58235100 | 4.44092100  | -7.63882200  |
| C | 30.00064200 | -3.55347300 | -8.18318800  | H  | 34.27685100 | 2.52464900  | -6.16872600  |
| N | 28.60007600 | -2.18533800 | -7.06090200  | H  | 33.38271300 | 3.46094200  | -4.98887100  |
| C | 27.98454800 | -2.66975800 | -8.14597800  | H  | 31.41719100 | 3.57451200  | -6.36019200  |
| N | 28.79024100 | -3.49045600 | -8.83831400  | H  | 32.31808800 | 3.24444400  | -7.82320100  |
| H | 32.79725300 | -2.81259200 | -7.00573700  | H  | 32.64224300 | 0.87665900  | -7.16333100  |
| H | 30.43807300 | -2.80891300 | -5.03078700  | H  | 32.06241100 | 1.20909400  | -5.54069300  |
| H | 31.09125300 | -1.43550800 | -5.88615700  | H  | 29.99172400 | 0.68245600  | -6.22092200  |
| H | 27.73546100 | -2.90212100 | -5.68670200  | H  | 31.65712400 | 1.93550600  | -9.05546300  |
| H | 30.82009200 | -4.14755800 | -8.55531300  | H  | 30.56545000 | 1.20712700  | -10.22696100 |
| H | 26.99154700 | -2.41522800 | -8.47955000  | H  | 28.65534100 | -0.36366900 | -7.71379700  |
| H | 28.51365700 | -4.01254600 | -9.68316600  | H  | 28.59940900 | 0.18867700  | -9.36336700  |
| C | 33.47999200 | -4.18203900 | -10.78310500 | C  | 31.09200000 | 7.81100600  | -10.77000100 |
| C | 33.31849100 | -2.74237600 | -10.32276500 | C  | 30.08241800 | 7.05011400  | -9.89159800  |
| O | 32.98128700 | -2.40644500 | -9.19277100  | C  | 28.76971700 | 6.82871000  | -10.58223000 |
| C | 32.15867700 | -4.96441900 | -10.85358500 | C  | 27.57479000 | 7.45479500  | -10.32952600 |
| O | 31.92763200 | -5.62461400 | -9.62873200  | C  | 28.53483800 | 5.92561100  | -11.68694800 |
| H | 33.95051000 | -4.19514200 | -11.77382100 | C  | 27.16738300 | 6.05964200  | -12.05680100 |
| H | 31.33013000 | -4.28393300 | -11.09445000 | C  | 29.33959600 | 5.00484200  | -12.38239500 |
| H | 32.23247700 | -5.69048900 | -11.67938200 | N  | 26.60709600 | 6.99979000  | -11.21239000 |
| H | 31.02430800 | -5.99264100 | -9.70537400  | C  | 26.59846900 | 5.31271700  | -13.09311700 |
| N | 33.56997600 | -1.80615200 | -11.28635700 | C  | 28.78118500 | 4.26358800  | -13.41728900 |
| C | 33.30496800 | -0.40201500 | -11.03296800 | C  | 27.42481700 | 4.42113000  | -13.76939800 |
| H | 33.74594600 | -2.10686600 | -12.23119500 | H  | 31.14711600 | 7.33848600  | -11.75714900 |
| H | 33.55316900 | 0.17080100  | -11.92867700 | H  | 30.51143900 | 6.07594600  | -9.61930800  |
| H | 32.25264200 | -0.23804300 | -10.79604200 | H  | 29.92310100 | 7.58820100  | -8.94996400  |
| C | 30.70393000 | -3.79212800 | -14.83683700 | H  | 27.33042400 | 8.19507800  | -9.58096900  |
| C | 30.70076800 | -2.81373500 | -13.65520900 | H  | 25.64651800 | 7.29863700  | -11.22658700 |
| C | 29.38751000 | -2.70070200 | -12.92626700 | H  | 30.38636800 | 4.86719700  | -12.13024800 |
| O | 28.28945900 | -2.91100900 | -13.46101300 | H  | 25.55616400 | 5.43365100  | -13.36855200 |
| O | 29.54992700 | -2.34956400 | -11.67231600 | H  | 29.39248800 | 3.57479000  | -13.98727400 |
| H | 30.04340700 | -4.63809500 | -14.68328300 | H  | 27.03014100 | 3.84394200  | -14.59860000 |
| H | 31.44905800 | -3.07743600 | -12.90474000 | O  | 30.28480900 | 0.87237300  | -11.80977700 |
| C | 30.95833900 | -1.79510600 | -13.97250600 | H  | 30.49108600 | 1.70744300  | -12.27115300 |
| C | 27.87500700 | 1.06301300  | -17.13701200 | H  | 29.31655500 | 0.72333300  | -11.76683800 |
| C | 29.25012000 | 1.57407200  | -16.75703300 | N  | 16.96962600 | -3.30594700 | -12.61957900 |

|   |             |             |              |
|---|-------------|-------------|--------------|
| C | 16.59799800 | -4.45000600 | -11.75900200 |
| C | 15.33145300 | -3.94419800 | -11.04659700 |
| C | 14.70658800 | -2.97898500 | -12.06548400 |
| C | 15.92765000 | -2.26755800 | -12.65479400 |
| H | 17.40472100 | -4.66658300 | -11.05477000 |
| H | 14.66816100 | -4.76270700 | -10.75804100 |
| H | 15.60755700 | -3.39859100 | -10.13761800 |
| H | 14.18584000 | -3.54125200 | -12.84835900 |
| H | 13.99344000 | -2.28202700 | -11.61922800 |
| H | 15.78918800 | -1.91314200 | -13.67881100 |
| H | 16.23668500 | -1.40756000 | -12.04776400 |
| C | 29.55091300 | -2.94380900 | -1.16226500  |
| C | 28.26556800 | -3.75654300 | -1.35150800  |
| C | 28.03395700 | -4.23803200 | -2.78471900  |
| C | 27.84827700 | -3.12584300 | -3.80235900  |
| O | 27.98162700 | -1.93566100 | -3.58118900  |
| O | 27.55111900 | -3.61621500 | -5.01312800  |
| H | 29.53838900 | -2.10671000 | -1.86445400  |
| H | 28.26441100 | -4.62890900 | -0.68676500  |
| H | 27.41391500 | -3.13469300 | -1.05153600  |
| H | 28.87911600 | -4.84391200 | -3.13819400  |
| H | 27.15904300 | -4.89581800 | -2.84850200  |
| H | 30.46540100 | -3.51018200 | -1.36775500  |
| H | 29.56614300 | -2.49740400 | -0.16232600  |
| C | 34.86200500 | 8.00000500  | -10.31599600 |
| C | 35.23123800 | 6.50274000  | -10.33180400 |
| C | 35.06490500 | 5.89242900  | -11.68559600 |
| C | 34.14179300 | 5.01651000  | -12.20353600 |
| N | 35.87492900 | 6.22476700  | -12.76230200 |
| C | 35.42857900 | 5.55183900  | -13.85816200 |
| N | 34.38118600 | 4.81478500  | -13.54848400 |
| H | 35.56676300 | 8.59483100  | -10.90650700 |
| H | 36.25521200 | 6.35355500  | -9.96496500  |
| H | 34.57659800 | 5.96103100  | -9.64179600  |
| H | 36.65745800 | 6.86086300  | -12.73606900 |
| H | 33.32166000 | 4.51193500  | -11.71484700 |
| H | 35.89119400 | 5.62562400  | -14.83120800 |
| H | 33.61159900 | 3.63146000  | -14.33409400 |
| H | 34.87099300 | 8.38159000  | -9.28967900  |
| H | 33.87104900 | 8.09550700  | -10.77198100 |

### TS1-A<sub>Zn</sub> (20.3 kcal/mol)

|   |             |             |              |
|---|-------------|-------------|--------------|
| H | 20.66694100 | -6.80396900 | -16.56503700 |
| H | 16.39007100 | -5.37410900 | -12.30884600 |
| H | 24.65797500 | -6.75700600 | -19.16499000 |
| H | 29.36481800 | -8.34221100 | -18.18000300 |
| H | 35.11200200 | 4.86999900  | -6.01600200  |
| H | 32.10199600 | 7.76394600  | -10.35099700 |
| H | 33.92503000 | -0.03001800 | -10.21101600 |
| H | 31.94995600 | -4.27902300 | -6.58590800  |
| H | 23.18498400 | 1.49699800  | -4.32300300  |
| H | 22.41697500 | 4.62897000  | -7.60400100  |
| H | 22.25400600 | 6.39000200  | -15.14804600 |
| H | 33.53399900 | 5.46899900  | -6.68100300  |
| H | 30.78100300 | 8.84800500  | -10.93698000 |
| H | 23.93698400 | 6.30999100  | -15.82101700 |
| H | 23.80798700 | -0.12302400 | -3.81401100  |
| H | 32.79689700 | -3.33916200 | -5.29794400  |
| H | 32.07502400 | 0.82298300  | -17.96198600 |
| H | 30.43502000 | -3.27794800 | -15.73597800 |
| H | 31.70209400 | -4.16471500 | -14.93613300 |
| H | 30.41824100 | -9.05969400 | -14.20491400 |
| H | 20.88589800 | -5.05002200 | -16.84102600 |
| H | 34.15692600 | -4.71598100 | -10.10791100 |
| H | 23.72484400 | -8.30795600 | -7.05597300  |
| H | 21.59197300 | -3.72901200 | -7.31997300  |
| H | 27.89806000 | 0.15092600  | -17.74188700 |
| H | 27.15897700 | 4.34402600  | -6.69901600  |
| C | 29.55197400 | -8.45617500 | -13.91521300 |
| C | 29.40960500 | -7.67115100 | -15.20336600 |
| O | 29.98416100 | -6.60258800 | -15.39830300 |
| C | 29.77928400 | -7.57121100 | -12.70073600 |
| C | 28.57885800 | -6.65734800 | -12.45494000 |
| C | 28.69818600 | -5.85675400 | -11.16585300 |
| O | 29.41943500 | -6.26819600 | -10.24323400 |
| O | 28.00347600 | -4.77140000 | -11.09198600 |
| H | 28.70581500 | -9.13842400 | -13.77340700 |
| H | 29.96916500 | -8.17481300 | -11.81034300 |
| H | 30.66795900 | -6.95657200 | -12.87098500 |
| H | 28.44021300 | -5.95959400 | -13.28320200 |
| H | 27.65231200 | -7.24659400 | -12.39331800 |
| N | 28.73087000 | -8.30426900 | -16.18974100 |
| C | 28.69018700 | -7.77097000 | -17.53408300 |
| C | 27.24281800 | -7.95694800 | -17.99015700 |
| O | 26.76802600 | -9.08503900 | -18.08694600 |
| H | 28.26202600 | -9.18461400 | -16.03197700 |
| H | 29.02543400 | -6.73419000 | -17.48908700 |
| N | 26.51603700 | -6.81996800 | -18.14549000 |
| C | 25.05595100 | -6.83995100 | -18.14804200 |
| C | 24.50975500 | -5.71840500 | -17.26764000 |
| H | 26.97026800 | -5.93947100 | -17.95119600 |
| H | 24.75690200 | -7.82223400 | -17.77367500 |
| H | 23.41803100 | -5.72516700 | -17.27305400 |
| H | 24.84935200 | -5.83210300 | -16.23460700 |
| H | 24.83068100 | -4.73329600 | -17.62901500 |
| C | 23.25800300 | 6.03506800  | -15.04095800 |
| C | 23.24560100 | 4.49282700  | -15.01650500 |

|   |             |             |              |
|---|-------------|-------------|--------------|
| C | 22.38049200 | 3.87360600  | -13.94858600 |
| C | 22.71720300 | 3.99455100  | -12.59483600 |
| C | 21.25832400 | 3.10170800  | -14.27591400 |
| C | 21.98195700 | 3.34729400  | -11.60826400 |
| C | 20.50850900 | 2.44579200  | -13.30085900 |
| C | 20.87702500 | 2.56387700  | -11.95854800 |
| O | 20.13653700 | 1.89723300  | -11.02591300 |
| H | 23.64527100 | 6.43619500  | -14.09784800 |
| H | 22.91162500 | 4.13300800  | -15.99702900 |
| H | 24.27503600 | 4.12860800  | -14.90123800 |
| H | 23.59243400 | 4.57029800  | -12.30573400 |
| H | 20.98015900 | 2.99127200  | -15.32110800 |
| H | 22.27668600 | 3.42256200  | -10.56904400 |
| H | 19.65387700 | 1.82946600  | -13.55944400 |
| H | 20.58181700 | 1.97258800  | -10.16976900 |
| C | 20.86217900 | -5.84001400 | -16.08296300 |
| C | 19.87978700 | -5.68125900 | -14.92714100 |
| O | 19.34476700 | -6.65605100 | -14.41071700 |
| H | 21.86270500 | -5.87695800 | -15.63578000 |
| N | 19.70271400 | -4.40565400 | -14.45244800 |
| C | 19.19495300 | -4.19788200 | -13.09501000 |
| C | 18.20019400 | -3.05134100 | -13.10833400 |
| O | 18.50589000 | -1.94251500 | -13.58381900 |
| C | 20.39557300 | -3.96639800 | -12.14867300 |
| O | 20.07348800 | -4.13957800 | -10.76546600 |
| H | 20.27405700 | -3.65140700 | -14.82433700 |
| H | 18.72338000 | -5.13913600 | -12.81581500 |
| H | 21.14818700 | -4.71753600 | -12.39721400 |
| H | 20.84002900 | -2.98299100 | -12.33367700 |
| H | 19.81301900 | -3.28527200 | -10.40019100 |
| C | 23.90620400 | -7.35609400 | -7.56598900  |
| C | 22.91152700 | -6.30102900 | -7.10321700  |
| O | 21.73940300 | -6.60256200 | -6.86769000  |
| C | 23.65527700 | -7.60320100 | -9.08309000  |
| C | 23.96422200 | -6.41462300 | -9.93456500  |
| C | 25.15538700 | -6.01035000 | -10.48334300 |
| N | 23.07692200 | -5.38162300 | -10.21080000 |
| C | 23.74354000 | -4.41625700 | -10.89219600 |
| N | 25.00632500 | -4.77130700 | -11.07152200 |
| H | 24.94681800 | -7.06609400 | -7.40466300  |
| H | 24.27875500 | -8.43732600 | -9.41831000  |
| H | 22.61078500 | -7.90731200 | -9.20742500  |
| H | 22.09962700 | -5.32457700 | -9.94517900  |
| H | 26.10952600 | -6.51144400 | -10.46434100 |
| H | 23.29493000 | -3.50680700 | -11.25487000 |
| N | 23.32772700 | -5.00420900 | -7.09689600  |
| C | 22.40697800 | -3.96394100 | -6.62799700  |
| C | 23.31061800 | -2.76185300 | -6.34299700  |
| C | 24.51429500 | -2.97631300 | -7.26707500  |
| C | 24.70932400 | -4.49550500 | -7.23487800  |
| H | 21.89948700 | -4.32330900 | -5.72597200  |
| H | 22.80355400 | -1.81633100 | -6.52058600  |
| H | 23.64125700 | -2.78069800 | -5.29898000  |
| H | 24.28625400 | -2.64102900 | -8.28427800  |
| H | 25.40483800 | -2.44743600 | -6.92613600  |
| H | 25.18311600 | -4.87326500 | -8.14071800  |
| H | 25.32448400 | -4.78333000 | -6.37253100  |
| C | 23.17502800 | 4.07105000  | -8.16498500  |
| C | 24.47076100 | 3.93205500  | -7.38554900  |
| O | 24.49316500 | 3.81532200  | -6.15970800  |
| H | 22.78262700 | 3.06811000  | -8.36151600  |
| H | 23.31890200 | 4.57981300  | -9.11999200  |
| N | 25.60478200 | 3.92054300  | -8.13753800  |
| C | 26.90902500 | 3.66695600  | -7.52199000  |
| C | 27.88229300 | 3.80761900  | -8.69813000  |
| C | 27.07306700 | 3.26453100  | -9.87961100  |
| C | 25.66729800 | 3.81334200  | -9.61079200  |
| H | 26.93725400 | 2.64740300  | -7.11345500  |
| H | 28.11546100 | 4.86459700  | -8.86494000  |
| H | 28.81853100 | 3.27168200  | -8.53706700  |
| H | 27.45759900 | 3.58277800  | -10.84851600 |
| H | 27.06248400 | 2.17173800  | -9.86153300  |
| H | 25.53961400 | 4.80118700  | -10.07234500 |
| H | 24.89261200 | 3.14534600  | -9.99345700  |
| C | 23.37403200 | 0.46302800  | -4.62998800  |
| C | 24.36223100 | 0.46748700  | -5.81270300  |
| C | 23.79008300 | 0.52759300  | -7.21663600  |
| C | 22.42059000 | 0.47777900  | -7.49912600  |
| C | 24.68029000 | 0.55443400  | -8.30461500  |
| C | 21.95696400 | 0.39500600  | -8.81728300  |
| C | 24.22391000 | 0.50362500  | -9.61921000  |
| C | 22.85406900 | 0.40564600  | -9.88535100  |
| H | 22.42127500 | -0.01488200 | -4.87275100  |
| H | 25.04430800 | 1.31563600  | -5.69113400  |
| H | 24.98896600 | -0.43166600 | -5.76710400  |
| H | 21.70096100 | 0.47591700  | -6.68814100  |
| H | 25.74981600 | 0.59947200  | -8.11580500  |
| H | 20.89036000 | 0.28494100  | -9.00056900  |
| H | 24.93329600 | 0.53520400  | -10.43599500 |
| H | 22.50518800 | 0.33618400  | -10.90902100 |
| C | 32.20615700 | -3.27979600 | -6.21812100  |
| C | 30.88857300 | -2.52478500 | -5.94883900  |
| C | 29.88476900 | -2.71977400 | -7.04708500  |
| C | 30.03957400 | -3.43486200 | -8.20939700  |
| N | 28.57954400 | -2.22086200 | -6.99339200  |
| C | 27.99050500 | -2.64216700 | -8.11928800  |
| N | 28.83294200 | -3.36821400 | -8.86833600  |
| H | 32.78720600 | -2.80058400 | -7.00542800  |
| H | 30.44466600 | -2.86444200 | -5.00382200  |

|    |             |             |              |
|----|-------------|-------------|--------------|
| H  | 31.08844100 | -1.45312400 | -5.80424200  |
| H  | 27.73599100 | -2.94786700 | -5.67627300  |
| H  | 30.88121600 | -3.98177900 | -8.60298800  |
| H  | 26.99025600 | -2.40657200 | -8.44123600  |
| H  | 28.57003700 | -3.85119000 | -9.74366500  |
| C  | 33.48000200 | -4.18207600 | -10.78313500 |
| C  | 33.34757000 | -2.74074700 | -10.31854100 |
| O  | 33.07786700 | -2.40296900 | -9.17069700  |
| C  | 32.16055600 | -4.96424000 | -10.81756700 |
| O  | 31.92480100 | -5.54494700 | -9.55764700  |
| H  | 33.93319500 | -4.20514300 | -11.78121100 |
| H  | 31.33508500 | -4.29657200 | -11.10985600 |
| H  | 32.23487700 | -5.73582200 | -11.60029500 |
| H  | 31.02834200 | -5.93703500 | -9.61642600  |
| N  | 33.55799800 | -1.80720300 | -11.29337300 |
| C  | 33.30495800 | -0.40199500 | -11.03296500 |
| H  | 33.64055400 | -2.11268300 | -12.25001500 |
| H  | 33.56013700 | 0.17048100  | -11.92771200 |
| H  | 32.25341100 | -0.22252300 | -10.80116700 |
| C  | 30.70382300 | -3.79243700 | -14.83666400 |
| C  | 30.40818300 | -2.82508900 | -13.67505900 |
| C  | 28.93498800 | -2.40148000 | -13.66662400 |
| O  | 28.04272500 | -3.28886300 | -13.69274400 |
| O  | 28.68280300 | -1.14209200 | -13.62028200 |
| H  | 30.05978300 | -4.66286400 | -14.75918400 |
| H  | 30.57422900 | -3.31490300 | -12.70878100 |
| H  | 31.02633800 | -1.92545700 | -13.69805600 |
| C  | 27.87495400 | 1.06310500  | -17.13710400 |
| C  | 29.24695500 | 1.58305300  | -16.76066300 |
| O  | 29.40626700 | 2.65276000  | -16.17439900 |
| C  | 27.04880100 | 0.80015100  | -15.86891500 |
| C  | 25.64887600 | 0.35751700  | -16.19185400 |
| C  | 24.68549500 | 1.29234800  | -16.58273500 |
| C  | 25.27368600 | -0.98744600 | -16.11004600 |
| C  | 23.38227300 | 0.90218800  | -16.88003200 |
| C  | 23.97542500 | -1.39959900 | -16.40363900 |
| C  | 23.03616800 | -0.44522300 | -16.79089500 |
| O  | 21.74439700 | -0.87926600 | -17.04695600 |
| H  | 27.38537100 | 1.83636400  | -17.73941600 |
| H  | 27.55744400 | 0.04093600  | -15.27111600 |
| H  | 27.03186500 | 1.71248000  | -15.26978400 |
| H  | 24.95029800 | 2.34459400  | -16.63463700 |
| H  | 25.99848700 | -1.71992900 | -15.76491100 |
| H  | 22.63691900 | 1.64271500  | -17.16189800 |
| H  | 23.68012300 | -2.43447800 | -16.27145100 |
| H  | 21.22096100 | -0.13128200 | -17.36400800 |
| N  | 30.27020900 | 0.76441900  | -17.10186500 |
| C  | 31.68299000 | 1.10903600  | -16.98000100 |
| C  | 32.35210800 | 0.35628300  | -15.82762900 |
| C  | 31.76549000 | 0.74139300  | -14.46740500 |
| C  | 32.13463200 | 2.12468800  | -13.96848400 |
| O  | 33.06123100 | 2.72617200  | -14.68589400 |
| O  | 31.64590100 | 2.60936900  | -12.94552200 |
| H  | 30.04382100 | -0.09945600 | -17.56990700 |
| H  | 31.75770900 | 2.18856600  | -16.84853300 |
| H  | 32.21281500 | -0.72165100 | -15.97759100 |
| H  | 33.42813500 | 0.55234800  | -15.84364000 |
| H  | 30.67585500 | 0.65016100  | -14.46219400 |
| H  | 32.10278800 | 0.04788300  | -13.68968000 |
| C  | 27.13835500 | -0.90625700 | -11.21270700 |
| O  | 27.81128000 | -0.03722800 | -10.59755500 |
| O  | 27.04031200 | -2.12011800 | -10.89445700 |
| C  | 26.40778300 | -0.40899500 | -12.47686900 |
| C  | 25.18624000 | -1.12811000 | -12.85176700 |
| O  | 25.11259500 | -2.40717100 | -12.84614800 |
| C  | 24.03402000 | -0.37280100 | -13.23739100 |
| C  | 24.08101800 | 0.99123700  | -13.32473500 |
| C  | 25.27249500 | 1.71508500  | -13.03228700 |
| C  | 26.37401600 | 1.03997000  | -12.60020100 |
| H  | 27.45541700 | -0.83069700 | -13.21936000 |
| H  | 23.12460400 | -0.91192300 | -13.48165900 |
| H  | 23.19271700 | 1.52919900  | -13.62704300 |
| H  | 25.29163300 | 2.79401400  | -13.11878100 |
| H  | 27.26622000 | 1.58308700  | -12.31468900 |
| Zn | 26.56869700 | -3.74701600 | -12.12065900 |
| O  | 25.93358300 | -4.96806000 | -13.94995100 |
| H  | 25.01282700 | -4.72961600 | -14.17388000 |
| H  | 26.50882400 | -4.46300800 | -14.54390900 |
| O  | 23.28740300 | -3.85318800 | -14.15298900 |
| H  | 22.49951200 | -3.33608800 | -14.38820600 |
| H  | 23.84152700 | -3.21844300 | -13.63993800 |
| O  | 21.11605500 | -1.92643300 | -14.54823300 |
| H  | 21.18206600 | -1.50452500 | -15.42386300 |
| H  | 20.21323100 | -1.74475300 | -14.19993400 |
| C  | 34.22902200 | 4.62602000  | -6.61599000  |
| C  | 33.57567300 | 3.37153700  | -6.01516200  |
| C  | 32.21982400 | 2.99707100  | -6.62788100  |
| C  | 31.89324900 | 1.51270700  | -6.38062700  |
| N  | 30.51866500 | 1.12448600  | -6.68168200  |
| C  | 30.02809400 | 0.95048900  | -7.93058700  |
| N  | 30.71053100 | 1.39847500  | -8.98313900  |
| N  | 28.82190100 | 0.39795300  | -8.07382500  |
| H  | 34.57146000 | 4.41944600  | -7.63749800  |
| H  | 34.27215800 | 2.53103700  | -6.13763600  |
| H  | 33.45052200 | 3.49990100  | -4.93293100  |
| H  | 31.42027100 | 3.61807500  | -6.20877100  |
| H  | 32.23742900 | 3.21904900  | -7.70214600  |
| H  | 32.58819000 | 0.87363000  | -6.94228200  |
| H  | 32.05176500 | 1.28493600  | -5.32341700  |

|   |             |             |              |
|---|-------------|-------------|--------------|
| H | 29.95432800 | 0.75045000  | -5.93284100  |
| H | 31.61167500 | 1.81753000  | -8.83540000  |
| H | 30.46775600 | 1.12732100  | -9.96839600  |
| H | 28.57173600 | -0.32875200 | -7.39238200  |
| H | 28.49259700 | 0.17797500  | -9.02950200  |
| C | 31.09198900 | 7.81102200  | -10.77004300 |
| C | 30.08035300 | 7.04893900  | -9.89425100  |
| C | 28.77013700 | 6.83677100  | -10.59243300 |
| C | 27.58162000 | 7.48154100  | -10.35790600 |
| C | 28.53954200 | 5.94088900  | -11.70382700 |
| C | 27.18270500 | 6.10281000  | -12.10059000 |
| C | 29.34061300 | 5.00733300  | -12.38613000 |
| N | 26.62126000 | 7.04433500  | -11.25824300 |
| C | 26.62659000 | 5.38423600  | -13.16362900 |
| C | 28.79319900 | 4.28877300  | -13.44251200 |
| C | 27.45272600 | 4.48573800  | -13.83212000 |
| H | 31.14814300 | 7.33869100  | -11.75719300 |
| H | 30.50625400 | 6.07271500  | -9.62519100  |
| H | 29.92021200 | 7.58420000  | -8.95117300  |
| H | 27.33711100 | 8.22496100  | -9.61250300  |
| H | 25.67078700 | 7.37161400  | -11.29843100 |
| H | 30.37570700 | 4.83948700  | -12.10586400 |
| H | 25.59643200 | 5.53644000  | -13.46775700 |
| H | 29.39975600 | 3.58501500  | -13.99823200 |
| H | 27.07432900 | 3.93277200  | -14.68537800 |
| O | 30.27788600 | 0.69774800  | -11.51696900 |
| H | 30.47840600 | 1.45739900  | -12.09931900 |
| H | 29.33223700 | 0.46344200  | -11.55849300 |
| N | 16.97135800 | -3.30424000 | -12.61829700 |
| C | 16.59789100 | -4.44996800 | -11.75913200 |
| C | 15.33174800 | -3.94377600 | -11.04645000 |
| C | 14.70861500 | -2.97555200 | -12.06347700 |
| C | 15.93078500 | -2.26403800 | -12.65017900 |
| H | 17.40462000 | -4.66860600 | -11.05551100 |
| H | 14.66730900 | -4.76209300 | -10.76019500 |
| H | 15.60777400 | -3.40060900 | -10.13597600 |
| H | 14.18785100 | -3.53532200 | -12.84807800 |
| H | 13.99597200 | -2.27887400 | -11.61605500 |
| H | 15.79316800 | -1.90611100 | -13.67306500 |
| H | 16.24116000 | -1.40668000 | -12.04011600 |
| C | 29.55092000 | -2.94380800 | -1.16231800  |
| C | 28.26618100 | -3.76171800 | -1.33511800  |
| C | 28.02307900 | -4.25577800 | -2.76106300  |
| C | 27.82685400 | -3.15241800 | -3.78668600  |
| O | 27.95239700 | -1.95922800 | -3.57133500  |
| O | 27.53253900 | -3.65339600 | -4.99113200  |
| H | 29.53133400 | -2.11007500 | -1.86806000  |
| H | 28.27353500 | -4.62764900 | -0.66193500  |
| H | 27.41582700 | -3.13903500 | -1.03296800  |
| H | 28.86600100 | -4.86328300 | -3.11689500  |
| H | 27.14874300 | -4.91560400 | -2.81183000  |
| H | 30.46540900 | -3.51018300 | -1.36771600  |
| H | 29.56613300 | -2.49740900 | -0.16232300  |
| C | 34.86198400 | 7.99999100  | -10.31600900 |
| C | 35.21575600 | 6.49759700  | -10.32656900 |
| C | 34.96624100 | 5.87081600  | -11.65993300 |
| C | 34.01798300 | 4.98228400  | -12.10741500 |
| N | 35.69401000 | 6.20557000  | -12.79279500 |
| C | 35.17762500 | 5.52284100  | -13.85120900 |
| N | 34.16273800 | 4.77683500  | -13.46477600 |
| H | 35.57016800 | 8.58823300  | -10.90858000 |
| H | 36.25577600 | 6.34095700  | -10.01196200 |
| H | 34.59205700 | 5.97409900  | -9.59524200  |
| H | 36.46899400 | 6.85051100  | -12.82510200 |
| H | 33.24232100 | 4.47197000  | -11.55580500 |
| H | 35.56862400 | 5.59616500  | -14.85520700 |
| H | 33.38212700 | 3.58624000  | -14.23357500 |
| H | 34.87100800 | 8.38158600  | -9.28967800  |
| H | 33.87104900 | 8.09552800  | -10.77197600 |

### Int-A<sub>Zn</sub> (12.9 kcal/mol)

|   |             |             |              |
|---|-------------|-------------|--------------|
| H | 20.66696600 | -6.80398100 | -16.56502200 |
| H | 16.39006300 | -5.37409300 | -12.30886900 |
| H | 24.65797500 | -6.75700600 | -19.16499000 |
| H | 29.36482200 | -8.34221000 | -18.18000000 |
| H | 35.11213100 | 4.86994400  | -6.01617000  |
| H | 32.10199700 | 7.76390900  | -10.35100500 |
| H | 33.92503000 | -0.03001400 | -10.21101800 |
| H | 31.94997100 | -4.27902300 | -6.58591900  |
| H | 23.18498300 | 1.49699500  | -4.32299600  |
| H | 22.41696300 | 4.62894500  | -7.60399400  |
| H | 22.25400800 | 6.39000700  | -15.14805300 |
| H | 33.53406900 | 5.46905100  | -6.68107300  |
| H | 30.78101700 | 8.84801000  | -10.93697700 |
| H | 23.93698600 | 6.30998200  | -15.82101800 |
| H | 23.80798400 | -0.12303100 | -3.81401500  |
| H | 32.79693100 | -3.33914500 | -5.29796400  |
| H | 32.07472200 | 0.82269300  | -17.96202300 |
| H | 30.43512300 | -3.27793100 | -15.73600000 |
| H | 31.70212600 | -4.16462500 | -14.93615200 |
| H | 30.41824100 | -9.05967800 | -14.20494600 |
| H | 20.88588700 | -5.05002200 | -16.84102700 |
| H | 34.15693300 | -4.71599400 | -10.10792800 |
| H | 23.72483800 | -8.30794500 | -7.05595300  |
| H | 21.59196600 | -3.72900200 | -7.31996100  |
| H | 27.89806400 | 0.15093000  | -17.74189300 |
| H | 27.15900700 | 4.34393000  | -6.69894600  |



|   |             |             |              |   |             |             |              |
|---|-------------|-------------|--------------|---|-------------|-------------|--------------|
| C | 29.55199100 | -8.45621800 | -13.91518400 | H | 27.46132500 | 3.65826400  | -10.85086400 |
| C | 29.41164200 | -7.67478600 | -15.20594600 | H | 27.06111100 | 2.22722700  | -9.90071200  |
| O | 29.99339400 | -6.61078500 | -15.40341000 | H | 25.52673300 | 4.84822800  | -10.04679700 |
| C | 29.78346400 | -7.56290400 | -12.70797800 | H | 24.89717800 | 3.18374300  | -10.00539000 |
| C | 28.58274700 | -6.64714100 | -12.46525900 | C | 23.37403400 | 0.46304400  | -4.62999100  |
| C | 28.74198200 | -5.80112100 | -11.20886100 | C | 24.30890600 | 0.46629800  | -5.84803000  |
| O | 29.40627500 | -6.23629800 | -10.25515900 | C | 23.65349200 | 0.55612900  | -7.21352100  |
| O | 28.14997200 | -4.65366200 | -11.20210600 | C | 22.26751400 | 0.56746800  | -7.41287000  |
| H | 28.70562600 | -9.13715700 | -13.76911900 | C | 24.47643700 | 0.56256000  | -8.35161500  |
| H | 29.97698500 | -8.15711600 | -11.81219900 | C | 21.72096600 | 0.52511500  | -8.70114500  |
| H | 30.66995500 | -6.94821100 | -12.88919800 | C | 23.93796300 | 0.55006100  | -9.63430200  |
| H | 28.41648300 | -5.98542100 | -13.31741600 | C | 22.55312200 | 0.51114200  | -9.82063300  |
| H | 27.66588900 | -7.24395100 | -12.35308300 | H | 22.41321500 | -0.01348600 | -4.84559500  |
| N | 28.72741200 | -8.30493800 | -16.19002100 | H | 25.00636100 | 1.30526300  | -5.75334500  |
| C | 28.69017300 | -7.77096900 | -17.53408500 | H | 24.92425400 | -0.44110100 | -5.84706300  |
| C | 27.24340600 | -7.95563000 | -17.99309200 | H | 21.59763500 | 0.58694900  | -6.56103700  |
| O | 26.76927700 | -9.08355600 | -18.09554300 | H | 25.55625900 | 0.55635200  | -8.23926500  |
| H | 28.25566700 | -9.18370300 | -16.03218000 | H | 20.64070000 | 0.47057800  | -8.82003700  |
| H | 29.02625500 | -6.73456700 | -17.48804900 | H | 24.60515100 | 0.56981200  | -10.48300400 |
| N | 26.51618100 | -6.81840700 | -18.14481400 | H | 22.13976400 | 0.46547600  | -10.82155900 |
| C | 25.05595700 | -6.83995000 | -18.14804500 | C | 32.20610200 | -3.27981700 | -6.21808100  |
| C | 24.50862100 | -5.71793200 | -17.26915500 | C | 30.88632900 | -2.52859000 | -5.94651800  |
| H | 26.96868300 | -5.93928600 | -17.94028100 | C | 29.89427200 | -2.70307900 | -7.05869500  |
| H | 24.75705800 | -7.82224700 | -17.77350200 | C | 30.08537400 | -3.34202300 | -8.25893200  |
| H | 23.41700800 | -5.72856300 | -17.27049600 | N | 28.56761300 | -2.26967400 | -6.98436900  |
| H | 24.85297400 | -5.82669300 | -16.23735100 | C | 28.00001600 | -2.65545700 | -8.13300400  |
| H | 24.82543300 | -4.73310100 | -17.63483700 | N | 28.87888700 | -3.29449700 | -8.92036000  |
| C | 23.25800100 | 6.03506300  | -15.04093600 | H | 32.78797100 | -2.79800600 | -7.00313100  |
| C | 23.22758100 | 4.49520700  | -14.99284100 | H | 30.43241800 | -2.88762400 | -5.01401200  |
| C | 22.32753700 | 3.92177300  | -13.92753300 | H | 31.08544100 | -1.45982800 | -5.77745200  |
| C | 22.62944300 | 4.08654800  | -12.56987100 | H | 27.75855000 | -3.01202100 | -5.67452700  |
| C | 21.98575000 | 3.16059600  | -14.25671500 | H | 30.94854500 | -3.84258900 | -8.66486600  |
| C | 21.85742300 | 3.48744000  | -11.58055600 | H | 26.99078300 | -2.44985400 | -8.44682600  |
| C | 20.41140900 | 2.55352000  | -13.27908800 | H | 28.64197900 | -3.75227700 | -9.81690800  |
| C | 20.74765400 | 2.71100500  | -11.93203300 | C | 33.48000100 | -4.18206100 | -10.78311400 |
| O | 19.97316100 | 2.08719000  | -10.99785300 | C | 33.36364000 | -2.73986600 | -10.31598700 |
| H | 23.64500800 | 6.44331300  | -14.10040200 | O | 33.13832400 | -2.39716800 | -9.16036100  |
| H | 22.90453100 | 4.12115900  | -15.97152500 | C | 32.15771100 | -4.95893400 | -10.80739800 |
| H | 24.24767400 | 4.11570700  | -14.84976300 | O | 31.91499700 | -5.51256800 | -9.53701400  |
| H | 23.50484500 | 4.66064800  | -12.27752600 | H | 33.92704000 | -4.20789300 | -11.78363600 |
| H | 20.94352100 | 3.01988500  | -15.30414100 | H | 31.33809300 | -4.29358600 | -11.11614400 |
| H | 22.12575800 | 3.59637900  | -10.53704900 | H | 32.23302500 | -5.74505600 | -11.57552400 |
| H | 19.55169700 | 1.94493900  | -13.53896600 | H | 31.00861700 | -5.88267400 | -9.58405900  |
| H | 20.40781300 | 2.16343100  | -10.13608000 | N | 33.53986500 | -1.80590100 | -11.29929400 |
| C | 20.86216200 | -5.84000100 | -16.08296900 | C | 33.30495600 | -0.40200600 | -11.03296400 |
| C | 19.88121700 | -5.68208200 | -14.92616000 | H | 33.58446200 | -2.11185400 | -12.25859900 |
| O | 19.35115200 | -6.65749400 | -14.40618800 | H | 33.55728700 | 0.17444000  | -11.92521300 |
| H | 21.86278100 | -5.87744300 | -15.63593200 | H | 32.25598500 | -0.20409400 | -10.78334000 |
| N | 19.69960600 | -4.40600500 | -14.45339300 | C | 30.70364900 | -3.79252900 | -14.83661900 |
| C | 19.19492500 | -4.19790400 | -13.09504800 | C | 30.46726900 | -2.88266600 | -13.62256700 |
| C | 18.20053800 | -3.05110300 | -13.10572600 | C | 29.07597800 | -2.24116200 | -13.62961200 |
| O | 18.50686500 | -1.94053700 | -13.57810800 | O | 28.05953200 | -3.01123600 | -13.75234600 |
| C | 20.39582500 | -3.96865200 | -12.14770500 | O | 28.99286800 | -0.98949300 | -13.52286700 |
| O | 20.06639700 | -4.11974900 | -10.76489000 | H | 30.05663000 | -4.66200900 | -14.77345700 |
| H | 20.26522800 | -3.64996900 | -14.82889400 | H | 30.52802400 | -3.47459100 | -12.70344100 |
| H | 18.72232400 | -5.13850800 | -12.81564500 | H | 31.20801400 | -2.08090600 | -13.55100100 |
| H | 21.13978800 | -4.73241400 | -12.38525100 | C | 27.87484500 | 1.06309500  | -17.13709800 |
| H | 20.85222700 | -2.99316700 | -12.34435400 | C | 29.24996600 | 1.61615700  | -16.81821200 |
| H | 19.81343500 | -3.25752800 | -10.41302400 | O | 29.41054200 | 2.73411700  | -16.33126400 |
| C | 23.90620500 | -7.35615700 | -7.56598700  | C | 27.12091400 | 0.78821000  | -15.81896800 |
| C | 22.89745200 | -6.30163200 | -7.13252000  | C | 25.69955100 | 0.37396800  | -16.07900900 |
| O | 21.71746200 | -6.59695300 | -6.93333400  | C | 24.74642600 | 1.33244000  | -16.43946400 |
| C | 23.74896400 | -7.58668100 | -9.09856700  | C | 25.30025900 | -0.96438200 | -16.00545100 |
| C | 24.08540900 | -6.39254200 | -9.93983800  | C | 23.43506100 | 0.97002600  | -16.73263700 |
| C | 25.26981600 | -6.00116600 | -10.51817500 | C | 23.99228700 | -1.34871500 | -16.29898800 |
| N | 23.19958200 | -5.35972200 | -10.22152700 | C | 23.06920700 | -0.37377700 | -16.67233000 |
| C | 23.85834800 | -4.41056900 | -10.93224100 | O | 21.77353100 | -0.78232400 | -16.94895900 |
| N | 25.11734900 | -4.77175600 | -11.13230600 | H | 27.33961900 | 1.82517100  | -17.71227000 |
| H | 24.93564300 | -7.05773200 | -7.35163000  | H | 27.65425700 | 0.02135300  | -15.24927000 |
| H | 24.40104800 | -8.41043900 | -9.40332300  | H | 27.14546200 | 1.69793100  | -15.21391000 |
| H | 22.71792900 | -7.90364400 | -9.28958400  | H | 25.03123900 | 2.37966700  | -16.48348100 |
| H | 22.22840200 | -5.29615900 | -9.93711300  | H | 26.01886000 | -1.71212800 | -15.68019800 |
| H | 26.21971700 | -6.51095600 | -10.50540000 | H | 22.70068900 | 1.72734500  | -16.99757500 |
| H | 23.40463000 | -3.50303400 | -11.29320700 | H | 23.68220900 | -2.38166600 | -16.18946900 |
| N | 23.32438000 | -5.00761500 | -7.09799700  | H | 21.26268500 | -0.01924300 | -17.25001700 |
| C | 22.40698200 | -3.96393500 | -6.62801500  | N | 30.27094100 | 0.76299900  | -17.07654900 |
| C | 23.31061700 | -2.75872800 | -6.35042900  | C | 31.68350000 | 1.10941000  | -16.97997700 |
| C | 24.52781400 | -2.98867300 | -7.25374100  | C | 32.37638300 | 0.34459900  | -15.84934600 |
| C | 24.71171500 | -4.50861000 | -7.20924000  | C | 31.82772500 | 0.71538000  | -14.47136300 |
| H | 21.90069300 | -4.31908600 | -5.72345200  | C | 32.25415100 | 2.06842600  | -13.93794500 |
| H | 22.80695800 | -1.81543000 | -6.55189000  | O | 33.14565700 | 2.68845800  | -14.67945200 |
| H | 23.62609900 | -2.75855900 | -5.30172900  | O | 31.82963000 | 2.51181300  | -12.86663200 |
| H | 24.31949400 | -2.65828300 | -8.27681400  | H | 30.04250500 | -0.14030300 | -17.46261500 |
| H | 25.41700400 | -2.46426400 | -6.90167900  | H | 31.75654300 | 2.18836800  | -16.84493200 |
| H | 25.20172900 | -4.89419200 | -8.10321800  | H | 32.22709300 | -0.73103000 | -16.00627400 |
| H | 25.30802600 | -4.79590400 | -6.33339700  | H | 33.45292600 | 0.53356100  | -15.89241700 |
| C | 23.17503800 | 4.07110500  | -8.16499100  | H | 30.73540000 | 0.65696100  | -14.45677500 |
| C | 24.46837600 | 3.92306400  | -7.38346000  | H | 32.15144500 | -0.01529100 | -13.72180600 |
| O | 24.48770000 | 3.79092700  | -6.15894100  | C | 26.82905700 | -0.85624500 | -11.04691100 |
| H | 22.77923700 | 3.07291500  | -8.37423000  | O | 27.11945100 | 0.03371200  | -10.22889800 |
| H | 23.32662400 | 4.58902400  | -9.11392600  | O | 26.92999000 | -2.10043300 | -10.88352400 |
| N | 25.60290200 | 3.92227400  | -8.13375600  | C | 26.29056700 | -0.36680100 | -12.45194700 |
| C | 26.90900100 | 3.66702700  | -7.52208300  | C | 25.03643400 | -1.08799300 | -12.82102300 |
| C | 27.88039200 | 3.83587400  | -8.69659200  | O | 25.01917400 | -2.35100500 | -12.86631500 |
| C | 27.07547200 | 3.31771700  | -9.89097400  | C | 23.85973500 | -0.32568700 | -13.12203300 |
| C | 25.66649800 | 3.85051900  | -9.60914600  | C | 23.92414000 | 1.03553300  | -13.17573000 |
| H | 26.94435800 | 2.64408800  | -7.12434300  | C | 25.13288700 | 1.76914600  | -12.90432500 |
| H | 28.11250400 | 4.89713200  | -8.83661500  | C | 26.25722000 | 1.10910400  | -12.55087700 |
| H | 28.81805900 | 3.29937900  | -8.54562700  | H | 27.12018400 | -0.72696900 | -13.09972100 |

|    |             |             |              |
|----|-------------|-------------|--------------|
| H  | 22.94519400 | -0.85567600 | -13.36834400 |
| H  | 23.03276300 | 1.58678200  | -13.44275300 |
| H  | 25.12889200 | 2.84931400  | -12.98064700 |
| H  | 27.18585800 | 1.62475900  | -12.33153800 |
| Zn | 26.67258200 | -3.66784000 | -12.20925100 |
| O  | 26.08377200 | -4.77494600 | -14.07586100 |
| H  | 25.17184800 | -4.54682300 | -14.33623100 |
| H  | 26.69272300 | -4.23674600 | -14.60884800 |
| O  | 23.27043000 | -3.89066200 | -14.21489500 |
| H  | 22.48250700 | -3.37480600 | -14.45386100 |
| H  | 23.77765700 | -3.26446300 | -13.65332700 |
| O  | 21.11015000 | -1.92222500 | -14.51859300 |
| H  | 21.18650700 | -1.46995300 | -15.37839700 |
| H  | 20.20096700 | -1.75350600 | -14.17712300 |
| C  | 34.22877800 | 4.62602500  | -6.61572900  |
| C  | 33.57240900 | 3.32640500  | -6.13324400  |
| C  | 32.31085600 | 2.92683900  | -6.91808600  |
| C  | 31.97293100 | 1.43137900  | -6.73002800  |
| N  | 30.56315300 | 1.09083600  | -6.89577800  |
| C  | 29.91643900 | 0.91595500  | -8.07090200  |
| N  | 30.46957300 | 1.32090900  | -9.21431800  |
| N  | 28.69783200 | 0.38026700  | -8.04411600  |
| H  | 34.59828100 | 4.47357400  | -7.63971400  |
| H  | 34.31365900 | 2.51972600  | -6.21082000  |
| H  | 33.31552500 | 3.39828000  | -5.06903700  |
| H  | 31.45648700 | 3.53163700  | -6.59425200  |
| H  | 32.46201900 | 3.15204400  | -7.98324800  |
| H  | 32.57919900 | 0.80794600  | -7.39896700  |
| H  | 32.23307300 | 1.13241600  | -5.71115600  |
| H  | 30.05200500 | 0.79630300  | -6.07708200  |
| H  | 31.29536800 | 1.89505400  | -9.19033600  |
| H  | 30.04175700 | 1.13730700  | -10.15052900 |
| H  | 28.52228400 | -0.34302300 | -7.33890200  |
| H  | 28.18931800 | 0.21607800  | -8.92983300  |
| C  | 31.09197500 | 7.81101300  | -10.77005800 |
| C  | 30.07295300 | 7.04051000  | -9.91154400  |
| C  | 28.77738000 | 6.82068700  | -10.63501900 |
| C  | 27.58109800 | 7.45797100  | -10.42073000 |
| C  | 28.57208500 | 5.92489600  | -11.75187000 |
| C  | 27.22058800 | 6.07741400  | -12.17037100 |
| C  | 29.38970100 | 4.99577200  | -12.42104400 |
| N  | 26.63938300 | 7.01597900  | -11.33811000 |
| C  | 26.68478300 | 5.35118500  | -13.23865500 |
| C  | 28.86274400 | 4.27125300  | -13.48321000 |
| C  | 27.52649200 | 4.45604300  | -13.89227200 |
| H  | 31.15484000 | 7.34500400  | -11.76015000 |
| H  | 30.50107700 | 6.06683700  | -9.63687300  |
| H  | 29.89175500 | 7.57229900  | -8.97037400  |
| H  | 27.31918500 | 8.19889300  | -9.67876600  |
| H  | 25.68693300 | 7.33519900  | -11.39239300 |
| H  | 30.42103000 | 4.83566100  | -12.12172000 |
| H  | 25.65812400 | 5.49653000  | -13.55870400 |
| H  | 29.47991000 | 3.56796200  | -14.02812400 |
| H  | 27.16643100 | 3.90024800  | -14.75145700 |
| O  | 29.66457400 | 1.09221300  | -11.78277000 |
| H  | 30.35268100 | 1.61812700  | -12.23743100 |
| H  | 29.52138300 | 0.28500200  | -12.31704600 |
| N  | 16.97148000 | -3.30409100 | -12.61794700 |
| C  | 16.59791000 | -4.44997600 | -11.75908100 |
| C  | 15.33174600 | -3.94387800 | -11.04629800 |
| C  | 14.70896400 | -2.97470600 | -12.06261300 |
| C  | 15.93142600 | -2.26316600 | -12.64858200 |
| H  | 17.40476600 | -4.66809300 | -11.05555000 |
| H  | 14.66706400 | -4.76224200 | -10.76081100 |
| H  | 15.60783000 | -3.40158600 | -10.13534800 |
| H  | 14.18806700 | -3.53359300 | -12.84774900 |
| H  | 13.99660700 | -2.27804300 | -11.61473300 |
| H  | 15.79409000 | -1.90396900 | -13.67105300 |
| H  | 16.24243500 | -1.40686000 | -12.03739600 |
| C  | 29.55091600 | -2.94385200 | -1.16225600  |
| C  | 28.27021500 | -3.77156800 | -1.32255400  |
| C  | 28.02959700 | -4.28985400 | -2.73990400  |
| C  | 27.82303000 | -3.20091800 | -3.77898800  |
| O  | 27.90963200 | -2.00364900 | -3.56788600  |
| O  | 27.56646800 | -3.71893300 | -4.98446000  |
| H  | 29.52402000 | -2.11339500 | -1.87151800  |
| H  | 28.28376500 | -4.62631200 | -0.63522500  |
| H  | 27.41649000 | -3.14894900 | -1.03028600  |
| H  | 28.87568100 | -4.89734100 | -3.08763200  |
| H  | 27.15904300 | -4.95577500 | -2.77918900  |
| H  | 30.46540800 | -3.51017200 | -1.36774700  |
| H  | 29.56613800 | -2.49737600 | -0.16233700  |
| C  | 34.86214500 | 7.99995900  | -10.31615700 |
| C  | 35.22365100 | 6.49986900  | -10.32123200 |
| C  | 34.99853900 | 5.86498900  | -11.65487100 |
| C  | 34.08815500 | 4.93782200  | -12.10175500 |
| N  | 35.71995700 | 6.22034300  | -12.78568400 |
| C  | 35.23684200 | 5.51218300  | -13.84277200 |
| N  | 34.24952000 | 4.72963500  | -13.45684500 |
| H  | 35.56962000 | 8.59041600  | -10.90756800 |
| H  | 36.26040200 | 6.35148600  | -9.99174600  |
| H  | 34.59405900 | 5.97366500  | -9.59697100  |
| H  | 36.46926700 | 6.89494700  | -12.81792300 |
| H  | 33.32900800 | 4.40033500  | -11.55320300 |
| H  | 35.62934300 | 5.59563500  | -14.84536100 |
| H  | 33.48865200 | 3.53943000  | -14.21874400 |
| H  | 34.87087600 | 8.38153600  | -9.28965800  |
| H  | 33.87101000 | 8.09563500  | -10.77187000 |

## TS2-A<sub>Zn</sub> (17.9 kcal/mol)

|   |             |             |              |
|---|-------------|-------------|--------------|
| H | 20.66694600 | -6.80396900 | -16.56503800 |
| H | 16.39005300 | -5.37409400 | -12.30886400 |
| H | 24.65797500 | -6.75700700 | -19.16499000 |
| H | 29.36482200 | -8.34220900 | -18.18000000 |
| H | 35.11211600 | 4.86996200  | -6.01615500  |
| H | 32.10199200 | 7.76390000  | -10.35099400 |
| H | 33.92503500 | -0.03001500 | -10.21102200 |
| H | 31.94997700 | -4.27903600 | -6.58588700  |
| H | 23.18497800 | 1.49699400  | -4.32299500  |
| H | 22.41694900 | 4.62894600  | -7.60401400  |
| H | 22.25403100 | 6.39002200  | -15.14821700 |
| H | 33.53409000 | 5.46907000  | -6.68104200  |
| H | 30.78105100 | 8.84802500  | -10.93694500 |
| H | 23.93693000 | 6.30998400  | -15.82106600 |
| H | 23.80795700 | -0.12305500 | -3.81401700  |
| H | 32.79691200 | -3.33919800 | -5.29795600  |
| H | 32.07471100 | 0.82269700  | -17.96202900 |
| H | 30.43519800 | -3.27793000 | -15.73602200 |
| H | 31.70214900 | -4.16455100 | -14.93619500 |
| H | 30.41823100 | -9.05968700 | -14.20495600 |
| H | 20.88587800 | -5.05002000 | -16.84102600 |
| H | 34.15693200 | -4.71599400 | -10.10792700 |
| H | 23.72482700 | -8.30796000 | -7.05598500  |
| H | 21.59199600 | -3.72898600 | -7.31999100  |
| H | 27.89804300 | 0.15092400  | -17.74188500 |
| H | 27.15900800 | 4.34385500  | -6.69888500  |
| C | 29.55201000 | -8.45621600 | -13.91517500 |
| C | 29.40908000 | -7.67387800 | -15.20548000 |
| O | 29.98438600 | -6.60593700 | -15.40049200 |
| C | 29.77444400 | -7.55681000 | -12.70506800 |
| C | 28.58763000 | -6.61381900 | -12.48581000 |
| C | 28.69620800 | -5.79246300 | -11.20487600 |
| O | 29.41528400 | -6.18848000 | -10.27398700 |
| O | 27.99346200 | -4.70874600 | -11.14417200 |
| H | 28.70589500 | -9.13776800 | -13.77022700 |
| H | 29.94108800 | -8.15231600 | -11.80452500 |
| H | 30.67582800 | -6.95965800 | -12.86965200 |
| H | 28.47822600 | -5.92630300 | -13.32694700 |
| H | 27.64839100 | -7.18380700 | -12.43411400 |
| N | 28.72868400 | -8.30653200 | -16.19079300 |
| C | 28.69017100 | -7.77096700 | -17.53408600 |
| C | 27.24398600 | -7.95397800 | -17.99514300 |
| O | 26.77168600 | -9.08190600 | -18.10585000 |
| H | 28.25871800 | -9.18631700 | -16.03352600 |
| H | 29.02708200 | -6.73488500 | -17.48665000 |
| N | 26.51598500 | -6.81644600 | -18.14092300 |
| C | 25.05595800 | -6.83995000 | -18.14804600 |
| C | 24.50032200 | -5.72318100 | -17.26961300 |
| H | 26.96663600 | -5.93854700 | -17.92751000 |
| H | 24.75795200 | -7.82371000 | -17.77636900 |
| H | 23.40895800 | -5.73001400 | -17.28674100 |
| H | 24.82847400 | -5.84307900 | -16.23493500 |
| H | 24.82496200 | -4.73623400 | -17.62261000 |
| C | 23.25804200 | 6.03503500  | -15.04069500 |
| C | 23.22860700 | 4.49460500  | -14.97881300 |
| C | 22.31858800 | 3.92858100  | -13.91699400 |
| C | 22.60558600 | 4.10593400  | -12.55791400 |
| C | 21.18981700 | 3.16917900  | -14.24978200 |
| C | 21.81861100 | 3.52284600  | -11.57075300 |
| C | 20.38823000 | 2.57698500  | -13.27473700 |
| C | 20.71059100 | 2.74660700  | -11.92594900 |
| O | 19.92491200 | 2.13327600  | -10.99236200 |
| H | 23.64440600 | 6.45029000  | -14.10266000 |
| H | 22.91442700 | 4.11213700  | -15.95687500 |
| H | 24.24621100 | 4.11448000  | -14.82171500 |
| H | 23.47992500 | 4.67972200  | -12.26180600 |
| H | 20.94582000 | 3.01769600  | -15.29830900 |
| H | 22.07556600 | 3.64215700  | -10.52541200 |
| H | 19.52971700 | 1.96818500  | -13.53808100 |
| H | 20.35469500 | 2.21382600  | -10.12882400 |
| C | 20.86219900 | -5.84002300 | -16.08295300 |
| C | 19.88511700 | -5.68553600 | -14.92168500 |
| O | 19.37397400 | -6.66527300 | -14.38998000 |
| H | 21.86358500 | -5.87569000 | -15.63746500 |
| N | 19.68662600 | -4.40876600 | -14.45901600 |
| C | 19.19492600 | -4.19789700 | -13.09503800 |
| C | 18.20155800 | -3.04985000 | -13.10172800 |
| O | 18.50717700 | -1.93799000 | -13.56984500 |
| C | 20.40953900 | -3.96514800 | -12.16791500 |
| O | 20.10234700 | -4.10332200 | -10.77760600 |
| H | 20.24415800 | -3.64916900 | -14.84312700 |
| H | 18.72571300 | -5.13755100 | -12.80715600 |
| H | 21.14583600 | -4.73454300 | -12.41044700 |
| H | 20.86664600 | -2.99333200 | -12.38085600 |
| H | 19.86466200 | -3.23572400 | -10.42832600 |
| C | 23.90622000 | -7.35610000 | -7.56595900  |
| C | 22.90903900 | -6.30374600 | -7.10318700  |
| O | 21.74254400 | -6.60794500 | -6.84719500  |
| C | 23.69170600 | -7.58928200 | -9.09296200  |
| C | 24.01843500 | -6.41548500 | -9.96673500  |
| C | 25.19072900 | -6.06831600 | -10.59459200 |
| N | 23.14375800 | -5.37412300 | -10.25784100 |
| C | 23.79833300 | -4.46498300 | -11.02402300 |
| N | 25.04248500 | -4.85943900 | -11.24703300 |
| H | 24.94332500 | -7.06349400 | -7.38340800  |

|   |             |             |              |    |             |             |              |
|---|-------------|-------------|--------------|----|-------------|-------------|--------------|
| H | 24.31707400 | -8.42811900 | -9.41272300  | H  | 27.11694200 | 1.67292100  | -15.21325900 |
| H | 22.64937500 | -7.89147500 | -9.24222000  | H  | 25.02596900 | 2.43120300  | -16.49173000 |
| H | 22.17873600 | -5.28288600 | -9.95968800  | H  | 25.92213600 | -1.69817400 | -15.77225100 |
| H | 26.13031700 | -6.59645900 | -10.59389300 | H  | 22.68113800 | 1.83799400  | -17.00938200 |
| H | 23.35842700 | -3.55896300 | -11.40593200 | H  | 23.58010700 | -2.30588600 | -16.27816300 |
| N | 23.32203000 | -5.00439500 | -7.10916900  | H  | 21.18464600 | 0.13638200  | -17.21234200 |
| C | 22.40694700 | -3.96398400 | -6.62797200  | N  | 30.27096700 | 0.76149700  | -17.09741000 |
| C | 23.31005700 | -2.75818000 | -6.35975600  | C  | 31.68350500 | 1.10941100  | -16.97996200 |
| C | 24.50467200 | -2.97496800 | -7.29550000  | C  | 32.35542600 | 0.34412400  | -15.83648900 |
| C | 24.70048900 | -4.49501000 | -7.26832300  | C  | 31.77622400 | 0.70924300  | -14.46726100 |
| H | 21.90655800 | -4.32234300 | -5.72208000  | C  | 32.20741300 | 2.04789300  | -13.90068200 |
| H | 22.79802400 | -1.81495700 | -6.53983100  | O  | 33.05965400 | 2.70546700  | -14.65361500 |
| H | 23.65173700 | -2.76757200 | -5.31923200  | O  | 31.81391700 | 2.44051500  | -12.79898400 |
| H | 24.27171800 | -2.63684900 | -8.31055400  | H  | 30.04606000 | -0.09749500 | -17.57556500 |
| H | 25.39665300 | -2.44627300 | -6.95733800  | H  | 31.75809600 | 2.18791100  | -16.84162800 |
| H | 25.15995800 | -4.87182800 | -8.18275200  | H  | 32.21473200 | -0.73147500 | -15.99997700 |
| H | 25.32965400 | -4.78466100 | -6.41644700  | H  | 33.43183300 | 0.53826000  | -15.85169300 |
| C | 23.17506600 | 4.07109800  | -8.16496500  | H  | 30.68144500 | 0.69280100  | -14.48469900 |
| C | 24.46812700 | 3.92456500  | -7.38308600  | H  | 32.06150000 | -0.03551100 | -13.71683400 |
| O | 24.48940200 | 3.79581900  | -6.15819200  | C  | 26.69782300 | -1.01386700 | -10.73940600 |
| H | 22.77959700 | 3.07335200  | -8.37579100  | O  | 27.09037400 | -0.06304800 | -10.11955400 |
| H | 23.32741400 | 4.58928400  | -9.11358400  | O  | 26.48164900 | -2.20183900 | -10.67403900 |
| N | 25.60254500 | 3.92233500  | -8.13408400  | C  | 26.26522500 | -0.39739700 | -12.64873600 |
| C | 26.90898900 | 3.66712400  | -7.52217300  | C  | 25.06964200 | -1.13929900 | -12.93533300 |
| C | 27.87836600 | 3.81904500  | -8.70084500  | O  | 25.08763400 | -2.43167700 | -13.01150300 |
| C | 27.06672100 | 3.28884300  | -9.88624100  | C  | 23.85351500 | -0.41030200 | -13.10897300 |
| C | 25.66384100 | 3.83821000  | -9.60908500  | C  | 23.86516600 | 0.96463500  | -13.09480200 |
| H | 26.94009800 | 2.64627900  | -7.11793700  | C  | 25.05622200 | 1.70466800  | -12.85694500 |
| H | 28.11233100 | 4.87753200  | -8.85696900  | C  | 26.23340400 | 1.03087500  | -12.65519200 |
| H | 28.81561000 | 3.28226100  | -8.54741900  | H  | 27.22205600 | -0.87594500 | -12.85086700 |
| H | 27.45340000 | 3.60424500  | -10.85386300 | H  | 22.94058800 | -0.95336000 | -13.33191300 |
| H | 27.04113800 | 2.19894300  | -9.87581700  | H  | 22.93929000 | 1.49666600  | -13.26880000 |
| H | 25.53711000 | 4.83373200  | -10.05458500 | H  | 25.03045700 | 2.78727900  | -12.84443600 |
| H | 24.88733100 | 3.17798800  | -10.00124800 | H  | 27.16329900 | 1.55914500  | -12.46807100 |
| C | 23.37408100 | 0.46306700  | -4.63000000  | Zn | 26.58556200 | -3.75640800 | -12.31641100 |
| C | 24.29958900 | 0.46699900  | -5.85370100  | O  | 26.09811300 | -4.84718400 | -14.20893000 |
| C | 23.63129300 | 0.56528600  | -7.21266100  | H  | 25.20004200 | -4.56870900 | -14.47391100 |
| C | 22.24441200 | 0.57725000  | -7.40213500  | H  | 26.73290900 | -4.32968700 | -14.72905900 |
| C | 24.44618500 | 0.57983200  | -8.35624600  | O  | 23.31153200 | -3.89481700 | -14.32143800 |
| C | 21.69045000 | 0.54410600  | -8.68786500  | H  | 22.52041000 | -3.37480300 | -14.53597600 |
| C | 23.90208500 | 0.57000300  | -9.63682600  | H  | 23.85067700 | -3.27227000 | -13.77292700 |
| C | 22.51526400 | 0.53356400  | -9.81214200  | O  | 21.08450600 | -1.94289500 | -14.59432600 |
| H | 22.41198600 | -0.01288500 | -4.84147800  | H  | 21.15599500 | -1.44989400 | -15.43150300 |
| H | 25.00154700 | 1.30255400  | -5.76158700  | H  | 20.19339700 | -1.75506400 | -14.22026900 |
| H | 24.91017700 | -0.44369800 | -5.86132500  | C  | 34.22876000 | 4.62597900  | -6.61578000  |
| H | 21.57981400 | 0.59231100  | -6.54609500  | C  | 33.58842700 | 3.34683700  | -6.06459400  |
| H | 25.52557200 | 0.57978300  | -8.24047400  | C  | 32.29541300 | 2.92489800  | -6.77378600  |
| H | 20.60934200 | 0.49576400  | -8.80139800  | C  | 31.98535100 | 1.43548600  | -6.52501600  |
| H | 24.55307000 | 0.58980300  | -10.49945900 | N  | 30.58944000 | 1.06095900  | -6.71371100  |
| H | 22.09751700 | 0.49356600  | -10.81116100 | C  | 29.96663600 | 0.92724400  | -7.90212600  |
| C | 32.20612100 | -3.27974800 | -6.21812200  | N  | 30.54624700 | 1.32697300  | -9.02919300  |
| C | 30.88959500 | -2.52089400 | -5.96219500  | N  | 28.72236900 | 0.43354100  | -7.90114400  |
| C | 29.89318800 | -2.70755100 | -7.07000000  | H  | 34.58465700 | 4.44410300  | -7.63856300  |
| C | 30.05874900 | -3.37889900 | -8.25743400  | H  | 34.32435000 | 2.53549300  | -6.14616600  |
| N | 28.57258500 | -2.25928900 | -6.98620800  | H  | 33.38216900 | 3.45823500  | -4.99280600  |
| C | 27.98153400 | -2.67370500 | -8.11155500  | H  | 31.45226700 | 3.53288000  | -6.42733100  |
| N | 28.83968600 | -3.34112000 | -8.89940000  | H  | 32.39474900 | 3.12491200  | -7.84913800  |
| H | 32.79353700 | -2.80483800 | -7.00359700  | H  | 32.62205100 | 0.79770200  | -7.15146400  |
| H | 30.43075600 | -2.86306500 | -5.02585200  | H  | 32.22586400 | 1.18803500  | -5.48792500  |
| H | 31.09185900 | -1.45111000 | -5.81040100  | H  | 30.05145200 | 0.78945900  | -5.90431600  |
| H | 27.75036100 | -3.01128000 | -5.67146000  | H  | 31.42436600 | 1.81536000  | -8.98607800  |
| H | 30.91134700 | -3.89645300 | -8.66556900  | H  | 30.14168200 | 1.13930200  | -9.98612200  |
| H | 26.95663400 | -2.49922400 | -8.38870200  | H  | 28.53099700 | -0.33811900 | -7.24875600  |
| H | 28.57670100 | -3.82815400 | -9.77539200  | H  | 28.26911800 | 0.29642500  | -8.80347200  |
| C | 33.48000500 | -4.18206400 | -10.78311400 | C  | 31.09193800 | 7.81099900  | -10.77011500 |
| C | 33.36081800 | -2.73989500 | -10.31612400 | C  | 30.07775200 | 7.05160100  | -9.89573700  |
| O | 33.12709800 | -2.39806000 | -9.16194500  | C  | 28.77325900 | 6.83230900  | -10.60186900 |
| C | 32.15786000 | -4.96076400 | -10.80288900 | C  | 27.58313900 | 7.48051200  | -10.38543800 |
| O | 31.93112000 | -5.53484000 | -9.53760800  | C  | 28.55118300 | 5.91988900  | -11.70129600 |
| H | 33.92660500 | -4.20801800 | -11.78364900 | C  | 27.19623500 | 6.07272500  | -12.10756100 |
| H | 31.32821000 | -4.29640500 | -11.08652300 | C  | 29.35635800 | 4.97363100  | -12.36108100 |
| H | 32.22371000 | -5.73535400 | -11.58298700 | N  | 26.62983900 | 7.02996300  | -11.28632700 |
| H | 31.02896100 | -5.91269100 | -9.58968300  | C  | 26.64301500 | 5.32637500  | -13.15260100 |
| N | 33.54613000 | -1.80557900 | -11.29790700 | C  | 28.81253500 | 4.23028600  | -13.40140700 |
| C | 33.30494800 | -0.40200500 | -11.03296000 | C  | 27.47160600 | 4.41275500  | -13.79652300 |
| H | 33.57802700 | -2.11232900 | -12.25753000 | H  | 31.14769600 | 7.33833100  | -11.75716700 |
| H | 33.55632600 | 0.17485500  | -11.92520800 | H  | 30.50376400 | 6.07773000  | -9.61836200  |
| H | 32.25442800 | -0.20943500 | -10.78618900 | H  | 29.91065900 | 7.59202700  | -8.95682600  |
| C | 30.70351800 | -3.79260500 | -14.83654100 | H  | 27.33320200 | 8.23480800  | -9.65287200  |
| C | 30.58814500 | -2.86374800 | -13.63284100 | H  | 25.67669500 | 7.34861100  | -11.33182500 |
| C | 29.17936500 | -2.47380900 | -13.17925300 | H  | 30.38990100 | 4.81332000  | -12.06926900 |
| O | 28.18356900 | -3.17043000 | -13.58930400 | H  | 25.61185200 | 5.46571300  | -13.45989800 |
| O | 29.08665200 | -1.51068500 | -12.38270400 | H  | 29.41956900 | 3.51193700  | -13.93778400 |
| H | 30.04895200 | -4.65082000 | -14.73015100 | H  | 27.09240900 | 3.83621100  | -14.63324900 |
| H | 31.03486500 | -3.33733800 | -12.75120600 | O  | 29.73023600 | 0.98391900  | -11.54172900 |
| H | 31.14736700 | -1.93346300 | -13.77423300 | H  | 30.40113200 | 1.45528800  | -12.07340400 |
| C | 27.87487300 | 1.06309800  | -17.13711200 | N  | 29.63142500 | 0.06808100  | -11.88833500 |
| C | 29.24803100 | 1.59095100  | -16.77597500 | N  | 16.97105400 | -3.30444000 | -12.61691400 |
| O | 29.41052200 | 2.66629100  | -16.20193900 | C  | 16.59792100 | -4.44997700 | -11.75909300 |
| C | 27.07995700 | 0.78229100  | -15.84411600 | C  | 15.33147700 | -3.94479500 | -11.04580700 |
| C | 25.65234400 | 0.40395800  | -16.12901100 | C  | 14.70893500 | -2.97464500 | -12.06134900 |
| C | 24.72019000 | 1.38927200  | -16.46898500 | C  | 15.93176000 | -2.26306100 | -12.64653300 |
| C | 25.22451000 | -0.92635400 | -16.08415200 | H  | 17.40431200 | -4.66836800 | -11.05496500 |
| C | 23.40010800 | 1.06023100  | -16.76256700 | H  | 14.66674100 | -4.76342100 | -10.76103900 |
| C | 23.90838300 | -1.27753500 | -16.37550600 | H  | 15.60749200 | -3.40318300 | -10.13441700 |
| C | 23.00315900 | -0.27528000 | -16.71751900 | H  | 14.18801300 | -3.53283700 | -12.84699400 |
| O | 21.69486200 | -0.65041600 | -16.97914700 | H  | 13.99661800 | -2.27821300 | -11.61296700 |
| H | 27.36235800 | 1.83562100  | -17.71907300 | H  | 15.79450800 | -1.90269500 | -13.66862600 |
| H | 27.57381500 | -0.01726900 | -15.28234400 | H  | 16.24297700 | -1.40732800 | -12.03459300 |

|   |             |             |              |
|---|-------------|-------------|--------------|
| C | 29.55089600 | -2.94380800 | -1.16231600  |
| C | 28.26928700 | -3.76923700 | -1.32409300  |
| C | 28.02968100 | -4.28724000 | -2.74162400  |
| C | 27.83599700 | -3.19933100 | -3.78316000  |
| O | 27.95006000 | -2.00257100 | -3.58201200  |
| O | 27.55845500 | -3.71721700 | -4.98463900  |
| H | 29.52569000 | -2.11291400 | -1.87087800  |
| H | 28.28014900 | -4.62420800 | -0.63712700  |
| H | 27.41613900 | -3.14545200 | -1.03245000  |
| H | 28.87316300 | -4.90069300 | -3.08558100  |
| H | 27.15499300 | -4.94726100 | -2.78380900  |
| H | 30.46541200 | -3.51017900 | -1.36770900  |
| H | 29.56615500 | -2.49740900 | -0.16232200  |
| C | 34.86213900 | 7.99963000  | -10.31615500 |
| C | 35.22176800 | 6.49924200  | -10.31794900 |
| C | 34.97286900 | 5.85868100  | -11.64428300 |
| C | 34.05511800 | 4.92873800  | -12.06953800 |
| N | 35.66788900 | 6.21487100  | -12.79115300 |
| C | 35.16303200 | 5.50518100  | -13.83668600 |
| N | 34.18663500 | 4.72052500  | -13.42763100 |
| H | 35.57043800 | 8.58895900  | -10.90791400 |
| H | 36.26331300 | 6.35088000  | -10.00408900 |
| H | 34.60259500 | 5.97799400  | -9.58126800  |
| H | 36.41388000 | 6.89212200  | -12.84078700 |
| H | 33.31005600 | 4.38977600  | -11.50337900 |
| H | 35.53216800 | 5.58891300  | -14.84805500 |
| H | 33.41311700 | 3.54750200  | -14.17973900 |
| H | 34.87088100 | 8.38153500  | -9.28965800  |
| H | 33.87101000 | 8.09564200  | -10.77186900 |

# E:P-A<sub>Zn</sub> (-2.2 kcal/mol)

|   |             |             |              |
|---|-------------|-------------|--------------|
| H | 20.66694600 | -6.80396900 | -16.56503800 |
| H | 16.39005300 | -5.37409400 | -12.30886400 |
| H | 24.65797500 | -6.75700700 | -19.16499000 |
| H | 29.36482200 | -8.34220900 | -18.18000000 |
| H | 35.11211600 | 4.86996200  | -6.01615500  |
| H | 32.10199200 | 7.76390000  | -10.35099400 |
| H | 33.92503500 | -0.03001500 | -10.21102200 |
| H | 31.94997700 | -4.27903600 | -6.58588700  |
| H | 23.18497800 | 1.49699400  | -4.32299500  |
| H | 22.41694900 | 4.62894600  | -7.60401400  |
| H | 22.25403100 | 6.39002200  | -15.14821700 |
| H | 33.53409000 | 5.46907000  | -6.68104200  |
| H | 30.78105100 | 8.84802500  | -10.93694500 |
| H | 23.93693000 | 6.30998400  | -15.82106600 |
| H | 23.80795700 | -0.12305500 | -3.81401700  |
| H | 32.79691200 | -3.33919800 | -5.29795600  |
| H | 32.07471100 | 0.82269700  | -17.96202900 |
| H | 30.43519800 | -3.27793000 | -15.73602200 |
| H | 31.70214900 | -4.16455100 | -14.93619500 |
| H | 30.41823100 | -9.05968700 | -14.20495600 |
| H | 20.88587800 | -5.05002000 | -16.84102600 |
| H | 34.15693200 | -4.71599400 | -10.10792700 |
| H | 23.72482700 | -8.30796000 | -7.05598500  |
| H | 21.59199600 | -3.72898600 | -7.31999100  |
| H | 27.89804300 | 0.15092400  | -17.74188500 |
| H | 27.15900800 | 4.34385500  | -6.69888500  |
| C | 29.55201000 | -8.45621600 | -13.91517500 |
| C | 29.41137500 | -7.67353700 | -15.20543200 |
| O | 29.98953400 | -6.60717900 | -15.39970000 |
| C | 29.77165000 | -7.55696100 | -12.70272700 |
| C | 28.58095100 | -6.61890700 | -12.47494600 |
| C | 28.67681200 | -5.81412600 | -11.18047200 |
| O | 29.40968600 | -6.20245300 | -10.25768500 |
| O | 27.94321900 | -4.75092900 | -11.09697600 |
| H | 28.70595600 | -9.13815200 | -13.77160400 |
| H | 29.94343300 | -8.15458700 | -11.80445000 |
| H | 30.66981500 | -6.95530500 | -12.86827400 |
| H | 28.47342000 | -5.91976700 | -13.30781100 |
| H | 27.64349100 | -7.19305600 | -12.43430200 |
| N | 28.73063100 | -8.30579100 | -16.19047000 |
| C | 28.69017100 | -7.77096700 | -17.53408600 |
| C | 27.24272700 | -7.95639000 | -17.99026700 |
| O | 26.76876800 | -9.08486700 | -18.08846800 |
| H | 28.25748000 | -9.18382100 | -16.03261600 |
| H | 29.02588400 | -6.73439700 | -17.48810200 |
| N | 26.51589900 | -6.81959600 | -18.14349800 |
| C | 25.05595800 | -6.83995000 | -18.14804600 |
| C | 24.50559700 | -5.71411400 | -17.27623500 |
| H | 26.96945500 | -5.93955400 | -17.94570900 |
| H | 24.75558000 | -7.82090700 | -17.77142900 |
| H | 23.41371700 | -5.72303000 | -17.28953900 |
| H | 24.84196400 | -5.81822600 | -16.24132900 |
| H | 24.82642500 | -4.73164100 | -17.64530400 |
| C | 23.25804200 | 6.03503500  | -15.04069500 |
| C | 23.23404500 | 4.49376300  | -14.99535800 |
| C | 22.33980200 | 3.90362400  | -13.93411300 |
| C | 22.62693300 | 4.08255300  | -12.57581000 |
| C | 21.23873100 | 3.10533200  | -14.26780800 |
| C | 21.86393100 | 3.46723900  | -11.59015900 |
| C | 20.46456600 | 2.47639800  | -13.29411300 |
| C | 20.78583400 | 2.65122800  | -11.94626100 |
| O | 20.02641600 | 2.00539700  | -11.01153600 |
| H | 23.64453500 | 6.44470300  | -14.10036900 |
| H | 22.91372600 | 4.12287000  | -15.97593300 |
| H | 24.25456200 | 4.11554700  | -14.85281000 |
| H | 23.48629700 | 4.67863300  | -12.28047500 |

|   |             |             |              |
|---|-------------|-------------|--------------|
| H | 20.99836400 | 2.95002900  | -15.31662300 |
| H | 22.12011800 | 3.58839200  | -10.54480800 |
| H | 19.62949500 | 1.83565900  | -13.55743900 |
| H | 20.45647800 | 2.10274900  | -10.15022800 |
| C | 20.86219900 | -5.84002300 | -16.08295300 |
| C | 19.86778000 | -5.66999800 | -14.93828600 |
| O | 19.28111500 | -6.63429100 | -14.45783900 |
| H | 21.86153000 | -5.87768300 | -15.63315400 |
| N | 19.73926400 | -4.40029400 | -14.43731300 |
| C | 19.19492600 | -4.19789700 | -13.09503800 |
| C | 18.20344200 | -3.04865200 | -13.10591000 |
| O | 18.51280800 | -1.93530000 | -13.56652700 |
| C | 20.37377600 | -3.97761300 | -12.12054600 |
| O | 19.98837400 | -4.01626000 | -10.74456600 |
| H | 20.34271600 | -3.65671600 | -14.78474200 |
| H | 18.70906800 | -5.13752400 | -12.83551200 |
| H | 21.07830300 | -4.79735800 | -12.27924000 |
| H | 20.89553500 | -3.04639500 | -12.36311500 |
| H | 19.75976000 | -3.11974700 | -10.46961400 |
| C | 23.90622000 | -7.35610000 | -7.56595900  |
| C | 22.90956200 | -6.30635600 | -7.09912100  |
| O | 21.74535200 | -6.61301200 | -6.83589200  |
| C | 23.67426800 | -7.61341900 | -9.08492700  |
| C | 24.01035000 | -6.44870100 | -9.95866700  |
| C | 25.18424100 | -6.11536300 | -10.58755400 |
| N | 23.16702900 | -5.36863400 | -10.19206300 |
| C | 23.84246300 | -4.44633400 | -10.92270100 |
| N | 25.06962600 | -4.87386300 | -11.18100200 |
| H | 24.94528600 | -7.06405800 | -7.39640500  |
| H | 24.29034200 | -8.46131400 | -9.39853400  |
| H | 22.62775400 | -7.90793900 | -9.21981700  |
| H | 22.21571500 | -5.25940700 | -9.86154000  |
| H | 26.10519400 | -6.67436000 | -10.62035400 |
| H | 23.43604100 | -3.50674200 | -11.25496900 |
| N | 23.32032500 | -5.00715200 | -7.10692800  |
| C | 22.40694700 | -3.96398400 | -6.62797200  |
| C | 23.31760000 | -2.76026500 | -6.37031800  |
| C | 24.49201800 | -2.97683200 | -7.33230000  |
| C | 24.69327600 | -4.49535600 | -7.29744000  |
| H | 21.90916000 | -4.31689900 | -5.71880300  |
| H | 22.80547300 | -1.81478800 | -6.53591100  |
| H | 23.67987400 | -2.77697600 | -5.33672400  |
| H | 24.22607500 | -2.64811200 | -8.34249800  |
| H | 25.39244000 | -2.44211500 | -7.02596500  |
| H | 25.13788400 | -4.87937800 | -8.21617800  |
| H | 25.33956000 | -4.77554000 | -6.45506600  |
| C | 23.17506600 | 4.07109800  | -8.16496500  |
| C | 24.47096800 | 3.92997300  | -7.38665000  |
| O | 24.49724600 | 3.80837500  | -6.16134500  |
| H | 22.78308100 | 3.07018400  | -8.36889200  |
| H | 23.32309200 | 4.58325700  | -9.11754000  |
| N | 25.60625000 | 3.92370000  | -8.13902400  |
| C | 26.90898900 | 3.66712400  | -7.52217300  |
| C | 27.88354400 | 3.80612200  | -8.69689900  |
| C | 27.07369600 | 3.26451800  | -9.87693400  |
| C | 25.67189100 | 3.82392200  | -9.61341800  |
| H | 26.93210600 | 2.64793400  | -7.11017200  |
| H | 28.11702100 | 4.86253200  | -8.86622600  |
| H | 28.82049200 | 3.27241900  | -8.53137500  |
| H | 27.46281000 | 3.56202800  | -10.84954300 |
| H | 27.04131400 | 2.17184400  | -9.84460400  |
| H | 25.55789400 | 4.81538300  | -10.07037200 |
| H | 24.89574800 | 3.16477700  | -10.00633500 |
| C | 23.37408100 | 0.46306700  | -4.63000000  |
| C | 24.34460000 | 0.46649100  | -5.82188200  |
| C | 23.74004100 | 0.55387300  | -7.20943900  |
| C | 22.36397000 | 0.53907800  | -7.45969600  |
| C | 24.60521400 | 0.57529600  | -8.31639600  |
| C | 21.87054300 | 0.49102200  | -8.76923900  |
| C | 24.12328500 | 0.55085100  | -9.62181000  |
| C | 22.74449400 | 0.49294700  | -9.85516000  |
| H | 22.41916400 | -0.01468900 | -4.86487100  |
| H | 25.04043100 | 1.30378800  | -5.70207400  |
| H | 24.95816700 | -0.44268100 | -5.79784000  |
| H | 21.66225000 | 0.54352700  | -6.63335900  |
| H | 25.67896200 | 0.59739000  | -8.14258400  |
| H | 20.79732300 | 0.41630100  | -8.93144100  |
| H | 24.81063900 | 0.55454000  | -10.45801400 |
| H | 22.37678200 | 0.44509200  | -10.87276400 |
| C | 32.20612100 | -3.27974800 | -6.21812200  |
| C | 30.90660100 | -2.47507700 | -6.00768800  |
| C | 29.92118000 | -2.63664700 | -7.13491500  |
| C | 30.03310700 | -3.43594600 | -8.24806500  |
| N | 28.65555100 | -2.03926500 | -7.13210100  |
| C | 28.04370200 | -2.50238300 | -8.23251200  |
| N | 28.83883800 | -3.33330000 | -8.92487100  |
| H | 32.81371900 | -2.82739400 | -7.00286000  |
| H | 30.41589800 | -2.78410000 | -5.07608200  |
| H | 31.14562900 | -1.41119000 | -5.86576900  |
| H | 27.78213200 | -2.78088400 | -5.72040900  |
| H | 30.83780600 | -4.06280800 | -8.59899300  |
| H | 27.04482600 | -2.24022400 | -8.55128100  |
| H | 28.55945300 | -3.85838600 | -9.77542800  |
| C | 33.48000500 | -4.18206400 | -10.78311400 |
| C | 33.35820900 | -2.73770100 | -10.32283400 |
| O | 33.08742100 | -2.39261700 | -9.17761800  |
| C | 32.14361200 | -4.93966700 | -10.80429600 |
| O | 31.94214100 | -5.57633700 | -9.56263900  |
| H | 33.92775200 | -4.21197700 | -11.78304500 |

|    |             |             |              |
|----|-------------|-------------|--------------|
| H  | 31.31906200 | -4.24655500 | -11.02923900 |
| H  | 32.17333600 | -5.67608900 | -11.62200400 |
| H  | 31.04938400 | -5.97387900 | -9.62661800  |
| N  | 33.57103900 | -1.80264700 | -11.29958100 |
| C  | 33.30494800 | -0.40200500 | -11.03296000 |
| H  | 33.63610000 | -2.10707300 | -12.25820300 |
| H  | 33.54128400 | 0.18135700  | -11.92499600 |
| H  | 32.25379000 | -0.24225300 | -10.78014700 |
| C  | 30.70351800 | -3.79260500 | -14.83654100 |
| C  | 30.59031900 | -2.86267400 | -13.63061600 |
| C  | 29.19441400 | -2.66845300 | -13.03128400 |
| O  | 28.20907100 | -3.28254200 | -13.56610100 |
| O  | 29.11204500 | -1.94439400 | -12.00743000 |
| H  | 30.05091700 | -4.65185400 | -14.72921000 |
| H  | 31.19852200 | -3.23207800 | -12.79834100 |
| H  | 30.98497400 | -1.86469700 | -13.84621200 |
| C  | 27.87487300 | 1.06309800  | -17.13711200 |
| C  | 29.24863100 | 1.59011400  | -16.77888700 |
| O  | 29.41626700 | 2.66789100  | -16.21084800 |
| C  | 27.07718900 | 0.79401600  | -15.84104300 |
| C  | 25.64761100 | 0.42209700  | -16.12334800 |
| C  | 24.73079500 | 1.40501300  | -16.50831300 |
| C  | 25.20160200 | -0.89865200 | -16.02501900 |
| C  | 23.40602400 | 1.08463900  | -16.78941900 |
| C  | 23.88285200 | -1.24186900 | -16.31098700 |
| C  | 22.99004400 | -0.24168000 | -16.68832200 |
| O  | 21.67615200 | -0.61171100 | -16.93065200 |
| H  | 27.36498100 | 1.83520800  | -17.72206700 |
| H  | 27.56080300 | -0.00278100 | -15.26657400 |
| H  | 27.11468700 | 1.68778900  | -15.21487800 |
| H  | 25.05125700 | 2.44094400  | -16.57129600 |
| H  | 25.88823700 | -1.66699900 | -15.68141600 |
| H  | 22.69871400 | 1.86182800  | -17.06920600 |
| H  | 23.54030700 | -2.26240100 | -16.19066400 |
| H  | 21.16430400 | 0.17827100  | -17.14873100 |
| N  | 30.27206800 | 0.75691100  | -17.09423200 |
| C  | 31.68350500 | 1.10941100  | -16.97996200 |
| C  | 32.36704800 | 0.33080300  | -15.85246000 |
| C  | 31.75172600 | 0.62649500  | -14.48499300 |
| C  | 32.07574800 | 1.98042300  | -13.88646700 |
| O  | 32.94707800 | 2.67604300  | -14.58141100 |
| O  | 31.58837000 | 2.34343700  | -12.81431300 |
| H  | 30.04753000 | -0.10007000 | -17.57622400 |
| H  | 31.75579000 | 2.18659200  | -16.83326700 |
| H  | 32.26983700 | -0.74333300 | -16.05347200 |
| H  | 33.43521900 | 0.56607700  | -15.84370800 |
| H  | 30.66144300 | 0.53395900  | -14.52470200 |
| H  | 32.08426300 | -0.11020800 | -13.74589600 |
| C  | 26.43235200 | -0.27032100 | -12.37032700 |
| C  | 25.25740800 | -1.01631300 | -12.59510300 |
| O  | 25.21857400 | -2.34276500 | -12.45507300 |
| C  | 24.08850100 | -0.31923300 | -12.97078600 |
| C  | 24.09880800 | 1.06369400  | -13.10485900 |
| C  | 25.26490300 | 1.79941500  | -12.87218100 |
| C  | 26.43083500 | 1.11715400  | -12.51393800 |
| H  | 27.33743600 | -0.79685800 | -12.09164100 |
| H  | 23.17688500 | -0.87242100 | -13.17492700 |
| H  | 23.18808900 | 1.56677600  | -13.39957300 |
| H  | 25.26995300 | 2.87853200  | -12.96947200 |
| H  | 27.35591600 | 1.65971600  | -12.34653000 |
| Zn | 26.59476800 | -3.79905000 | -12.33217200 |
| O  | 25.92549100 | -4.73382700 | -14.20777300 |
| H  | 25.00949900 | -4.39591500 | -14.36478600 |
| H  | 26.52472700 | -4.25685700 | -14.79978500 |
| O  | 23.46687300 | -3.61829600 | -13.97957100 |
| H  | 22.70542700 | -3.07858500 | -14.25059800 |
| H  | 24.01546400 | -3.03334900 | -13.38644900 |
| O  | 21.13067300 | -1.92265300 | -14.53135300 |
| H  | 21.19000900 | -1.42601700 | -15.36727300 |
| H  | 20.23835500 | -1.74464200 | -14.15759100 |
| C  | 34.22876600 | 4.62597900  | -6.61578000  |
| C  | 33.56166800 | 3.35877700  | -6.05793800  |
| C  | 32.23996400 | 2.98670900  | -6.74968300  |
| C  | 31.92622000 | 1.48771000  | -6.59146700  |
| N  | 30.58500000 | 1.09243600  | -7.02178300  |
| C  | 30.19799900 | 1.00623400  | -8.30724100  |
| N  | 30.94249600 | 1.49813600  | -9.29582800  |
| N  | 29.00001100 | 0.47747000  | -8.59502000  |
| H  | 34.58052700 | 4.43584800  | -7.63815100  |
| H  | 34.27032600 | 2.52567500  | -6.15881300  |
| H  | 33.38181300 | 3.47040400  | -4.98197600  |
| H  | 31.41018400 | 3.57411300  | -6.34156300  |
| H  | 32.30105700 | 3.25724000  | -7.81095500  |
| H  | 32.67372600 | 0.88316200  | -7.12308300  |
| H  | 32.00127400 | 1.21239900  | -5.53677000  |
| H  | 29.97644600 | 0.64753100  | -6.34807200  |
| H  | 31.85982400 | 1.86358600  | -9.11496500  |
| H  | 30.65669500 | 1.21447100  | -10.25346900 |
| H  | 28.66495100 | -0.26422500 | -7.97044400  |
| H  | 28.79311600 | 0.37121300  | -9.58452000  |
| C  | 31.09193800 | 7.81099900  | -10.77011500 |
| C  | 30.08034400 | 7.05057900  | -9.89252600  |
| C  | 28.77548200 | 6.83076200  | -10.59736000 |
| C  | 27.58308600 | 7.47417300  | -10.37798100 |
| C  | 28.56084200 | 5.93369300  | -11.71067000 |
| C  | 27.20959100 | 6.09384700  | -12.12555000 |
| C  | 29.37189900 | 4.99995300  | -12.38106500 |
| N  | 26.63583900 | 7.03534200  | -11.29083500 |
| C  | 26.66809000 | 5.37404400  | -13.19497400 |

|   |             |             |              |
|---|-------------|-------------|--------------|
| C | 28.83898800 | 4.28224800  | -13.44483200 |
| C | 27.50367800 | 4.47700500  | -13.85213000 |
| H | 31.14656900 | 7.33745800  | -11.75664100 |
| H | 30.50909600 | 6.07730900  | -9.61632800  |
| H | 29.91504500 | 7.59098000  | -8.95326100  |
| H | 27.32838800 | 8.21882500  | -9.63721300  |
| H | 25.68404200 | 7.35738800  | -11.34145900 |
| H | 30.40124700 | 4.83017200  | -12.08027400 |
| H | 25.63946600 | 5.51794700  | -13.50819200 |
| H | 29.45005500 | 3.57435600  | -13.99014000 |
| H | 27.13346900 | 3.91630100  | -14.70325600 |
| O | 29.75681200 | 0.58718100  | -11.50821900 |
| H | 30.16148600 | 1.12834200  | -12.20971600 |
| H | 29.67590000 | -0.36133500 | -11.79144100 |
| N | 16.97174500 | -3.30446100 | -12.62061000 |
| C | 16.59792100 | -4.44997700 | -11.75909300 |
| C | 15.33237800 | -3.94258800 | -11.04600800 |
| C | 14.71218700 | -2.96852700 | -12.05917800 |
| C | 15.93684200 | -2.25887800 | -12.64246400 |
| H | 17.40553800 | -4.66510500 | -11.05566100 |
| H | 14.66533600 | -4.76002900 | -10.76295800 |
| H | 15.60947300 | -3.40359200 | -10.13336900 |
| H | 14.19002900 | -3.52356900 | -12.84628600 |
| H | 14.00152300 | -2.27139300 | -11.60911900 |
| H | 15.79908100 | -1.89204100 | -13.66220400 |
| H | 16.25193200 | -1.40741100 | -12.02634500 |
| C | 29.55089600 | -2.94380800 | -1.16231600  |
| C | 28.26043200 | -3.73705500 | -1.38987600  |
| C | 28.04947300 | -4.18045100 | -2.84032700  |
| C | 27.88729400 | -3.04527000 | -3.83771700  |
| O | 28.01959700 | -1.86028400 | -3.59166500  |
| O | 27.61100900 | -3.51061600 | -5.06511900  |
| H | 29.55641400 | -2.09852400 | -1.85599000  |
| H | 28.23710100 | -4.62646300 | -0.74876000  |
| H | 27.41049300 | -3.11323600 | -1.08948100  |
| H | 28.89562300 | -4.78504300 | -3.19356100  |
| H | 27.17108900 | -4.82992100 | -2.93381800  |
| H | 30.46541200 | -3.51017900 | -1.36770900  |
| H | 29.56615500 | -2.49740900 | -0.16232200  |
| C | 34.86213900 | 7.99996300  | -10.31615500 |
| C | 35.21171600 | 6.49636200  | -10.30928300 |
| C | 34.90062900 | 5.84342300  | -11.61535300 |
| C | 33.94072700 | 4.93575100  | -11.99300500 |
| N | 35.55415200 | 6.17270800  | -12.79360800 |
| C | 34.98555700 | 5.46962100  | -13.81048100 |
| N | 34.00700400 | 4.71490600  | -13.35318800 |
| H | 35.57333600 | 8.58273500  | -10.91006200 |
| H | 36.26349500 | 6.34245000  | -10.03530800 |
| H | 34.61757500 | 5.99093100  | -9.54166700  |
| H | 36.31362000 | 6.83095700  | -12.88099600 |
| H | 33.20619200 | 4.42604700  | -11.38719000 |
| H | 35.31301200 | 5.53448200  | -14.83745000 |
| H | 33.24323100 | 3.52905400  | -14.09131800 |
| H | 34.87088100 | 8.38153500  | -9.28965800  |
| H | 33.87101000 | 8.09564200  | -10.77186900 |

The transition states and intermediates involved in the reaction pathway with **Mode-B** for the Mg-enzyme of SDC.

#### E:S-B<sub>Mg</sub> (1.9 kcal/mol)

|   |             |             |              |
|---|-------------|-------------|--------------|
| H | 20.66706600 | -6.80406200 | -16.56490500 |
| H | 16.38995900 | -5.37400500 | -12.30897300 |
| H | 24.65804700 | -6.75722800 | -19.16503700 |
| H | 29.36460500 | -8.34236600 | -18.18009000 |
| H | 35.11198500 | 4.87001000  | -6.01598300  |
| H | 32.10200100 | 7.76399400  | -10.35100200 |
| H | 33.92510700 | -0.02999300 | -10.21108400 |
| H | 31.95000500 | -4.27896200 | -6.58610400  |
| H | 23.18522500 | 1.49712900  | -4.32329800  |
| H | 22.41700900 | 4.62901700  | -7.60400600  |
| H | 22.25386600 | 6.38954500  | -15.14827300 |
| H | 33.53399800 | 5.46899800  | -6.68099800  |
| H | 30.78100300 | 8.84800000  | -10.93700000 |
| H | 23.93862300 | 6.30925300  | -15.81983900 |
| H | 23.80780000 | -0.12316500 | -3.81401100  |
| H | 32.79714400 | -3.33879100 | -5.29807800  |
| H | 32.07507100 | 0.82308700  | -17.96199500 |
| H | 30.43491900 | -3.27775200 | -15.73583400 |
| H | 31.70201300 | -4.16491400 | -14.93618300 |
| H | 30.41799700 | -9.06001500 | -14.20497600 |
| H | 20.88596600 | -5.05007400 | -16.84107900 |
| H | 34.15715900 | -4.71603300 | -10.10818600 |
| H | 23.72468000 | -8.30785100 | -7.05583600  |
| H | 21.59201500 | -3.72880000 | -7.31994900  |
| H | 27.89809000 | 0.15097800  | -17.74196200 |
| H | 27.15896100 | 4.34410100  | -6.69907100  |
| C | 29.55218400 | -8.45631100 | -13.91551100 |
| C | 29.05964600 | -7.65433300 | -15.10210200 |
| O | 28.81402400 | -6.44065900 | -15.07833100 |
| C | 29.82534200 | -7.58685900 | -12.68609900 |
| C | 28.53258000 | -7.23256600 | -11.93330800 |

|   |             |             |              |   |             |             |              |
|---|-------------|-------------|--------------|---|-------------|-------------|--------------|
| C | 28.80807500 | -6.12163000 | -10.91072900 | C | 24.33239900 | 0.45492900  | -5.82812400  |
| O | 29.56833600 | -6.40440100 | -9.96921500  | C | 23.71962100 | 0.59054100  | -7.20792100  |
| O | 28.27343900 | -4.97883600 | -11.13254900 | C | 22.34497300 | 0.52709000  | -7.46198400  |
| H | 28.76973700 | -9.19137500 | -13.67347500 | C | 24.58035400 | 0.71285400  | -8.30997200  |
| H | 30.50266600 | -8.09854800 | -11.99816400 | C | 21.85119900 | 0.53007800  | -8.77200200  |
| H | 30.32649700 | -6.66783200 | -13.00656500 | C | 24.09447000 | 0.74690500  | -9.61241100  |
| H | 27.75404500 | -6.92894800 | -12.63569900 | C | 22.72177700 | 0.63669600  | -9.85560100  |
| H | 28.17936100 | -8.12599800 | -11.40416400 | H | 22.41578100 | -0.01294800 | -4.85578200  |
| N | 28.94418200 | -8.36766600 | -16.23583800 | H | 25.05859000 | 1.26443800  | -5.70080000  |
| C | 28.69016600 | -7.77022900 | -17.53345200 | H | 24.91144800 | -0.47697900 | -5.82649200  |
| C | 27.22762700 | -7.98306000 | -17.92846700 | H | 21.64431600 | 0.45363600  | -6.63801800  |
| O | 26.75974400 | -9.11276300 | -17.99582900 | H | 25.65225600 | 0.77129500  | -8.13744500  |
| H | 29.05736600 | -9.36966800 | -16.20490900 | H | 20.78275700 | 0.41819000  | -8.94066300  |
| H | 28.99547200 | -6.72398100 | -17.49517700 | H | 24.78149900 | 0.84048000  | -10.44051100 |
| N | 26.51527400 | -6.84243800 | -18.12628500 | H | 22.34956000 | 0.62666000  | -10.87299500 |
| C | 25.05614300 | -6.83990900 | -18.14801200 | C | 32.20580900 | -3.28026700 | -6.21781300  |
| C | 24.51911000 | -5.71023200 | -17.27003700 | C | 30.90819500 | -2.47208800 | -6.00148100  |
| H | 26.97241200 | -5.96600600 | -17.91899300 | C | 30.02537400 | -2.43813200 | -7.22365800  |
| H | 24.73908800 | -7.81603500 | -17.77114800 | C | 30.40413600 | -2.42591700 | -8.54705400  |
| H | 23.42724100 | -5.70223100 | -17.28118000 | N | 28.63226900 | -2.49027100 | -7.16464800  |
| H | 24.85331200 | -5.82937300 | -16.23421500 | C | 28.20575500 | -2.54632200 | -8.42922600  |
| H | 24.85477100 | -4.73026500 | -17.63166000 | N | 29.24790600 | -2.49816500 | -9.28571600  |
| C | 23.25606600 | 6.03698800  | -15.04213200 | H | 32.82867800 | -2.82885400 | -6.99372800  |
| C | 23.17259800 | 4.49849900  | -15.03156600 | H | 30.33025500 | -2.89303800 | -5.17559400  |
| C | 22.26005900 | 3.91688500  | -13.97759700 | H | 31.16334900 | -1.44922400 | -5.68044800  |
| C | 22.42571700 | 4.22990400  | -12.62336700 | H | 27.91761400 | -3.20801800 | -5.84099400  |
| C | 21.28348900 | 2.96682600  | -14.30794300 | H | 31.38395600 | -2.42280000 | -8.98708600  |
| C | 21.66844900 | 3.60395500  | -11.63764200 | H | 27.18278600 | -2.61735700 | -8.76656200  |
| C | 20.52549500 | 2.31708900  | -13.33665200 | H | 29.18428200 | -2.50019800 | -10.30839100 |
| O | 20.72506100 | 2.63422000  | -11.99061300 | C | 33.47990000 | -4.18206100 | -10.78263200 |
| O | 19.98242200 | 1.96973200  | -11.05534600 | C | 33.54897200 | -2.73111500 | -10.32972700 |
| H | 23.64623100 | 6.42508500  | -14.09520400 | O | 33.62602100 | -2.38617700 | -9.15236900  |
| H | 22.82534000 | 4.16830200  | -16.01703700 | C | 32.08684900 | -4.81577400 | -10.66083600 |
| H | 24.17704600 | 4.07036400  | -14.92065100 | O | 31.77510900 | -5.02390600 | -9.31247300  |
| H | 23.18017000 | 4.95232000  | -12.32351700 | H | 33.84318900 | -4.28025900 | -11.81182000 |
| H | 21.14745800 | 2.69307000  | -15.35054200 | H | 31.33613600 | -4.17267800 | -11.14870000 |
| H | 21.82524200 | 3.84548100  | -10.59152500 | H | 32.10031900 | -5.76119900 | -11.22860100 |
| H | 19.83137400 | 1.52624300  | -13.59555700 | H | 30.88080100 | -5.43605900 | -9.31866300  |
| H | 20.35017600 | 2.15878100  | -10.18083100 | N | 33.53386100 | -1.80127000 | -11.33080900 |
| C | 20.86193200 | -5.83974700 | -16.08300800 | C | 33.30483900 | -0.40190500 | -11.03293900 |
| C | 19.76940700 | -5.54633600 | -15.05610800 | H | 33.27376800 | -2.11475700 | -12.25446500 |
| O | 18.77269700 | -6.24838000 | -14.92673300 | H | 33.55324000 | 0.18929500  | -11.91873400 |
| H | 21.84197500 | -5.85673000 | -15.59658500 | H | 32.25377500 | -0.21037000 | -10.79230500 |
| N | 19.99290700 | -4.42909600 | -14.28926500 | C | 30.70430000 | -3.79269300 | -14.83716500 |
| C | 19.19490800 | -4.19819100 | -13.09497300 | C | 30.68818900 | -2.83239700 | -13.64917300 |
| C | 18.14399800 | -3.10489700 | -13.25372600 | C | 29.33714500 | -2.59248800 | -12.98824000 |
| O | 18.38174100 | -2.04040100 | -13.84800600 | O | 28.31627600 | -3.17104900 | -13.45727700 |
| C | 20.16180700 | -3.85098100 | -11.93769500 | O | 29.35866300 | -1.82087800 | -11.98328000 |
| O | 19.50451500 | -3.63906900 | -10.69409300 | H | 30.02210400 | -4.62682300 | -14.68471900 |
| H | 20.91644500 | -4.00167600 | -14.32659300 | H | 31.33063200 | -3.20629200 | -12.84576100 |
| H | 18.69448100 | -5.14212600 | -12.87382100 | H | 31.09632900 | -1.84863800 | -13.91260000 |
| H | 20.83468200 | -4.70345100 | -11.80882900 | C | 27.87487500 | 1.06305200  | -17.13700000 |
| H | 20.77758100 | -2.99049000 | -12.21554200 | C | 29.25242500 | 1.59113000  | -16.79376000 |
| H | 19.21357300 | -2.71892100 | -10.66557100 | O | 29.42119400 | 2.70452200  | -16.29833700 |
| C | 23.90649100 | -7.35674400 | -7.56585800  | C | 27.06163300 | 0.81322100  | -15.84924400 |
| C | 22.89712700 | -6.30717100 | -7.13070300  | C | 25.61560900 | 0.50196400  | -16.13702800 |
| O | 21.73073800 | -6.61670600 | -6.87956800  | C | 24.76835400 | 1.50085300  | -16.62759900 |
| C | 23.70085900 | -7.69077600 | -9.06782100  | C | 25.07949300 | -0.76928200 | -15.90974100 |
| C | 24.10262300 | -6.59931800 | -9.99496600  | C | 23.42108100 | 1.24811200  | -16.87202400 |
| C | 25.31034000 | -6.32522000 | -10.58209600 | C | 23.73452100 | -1.04222200 | -16.14958200 |
| N | 23.28059600 | -5.54654500 | -10.36651100 | C | 22.90745600 | -0.02382800 | -16.61994100 |
| C | 23.99701000 | -4.69591900 | -11.14874500 | O | 21.56773800 | -0.31827300 | -16.78944500 |
| N | 25.23452500 | -5.14573700 | -11.29448900 | H | 27.37731200 | 1.83555900  | -17.73147000 |
| H | 24.94209400 | -7.05859500 | -7.38898100  | H | 27.51365900 | -0.00757500 | -15.28177500 |
| H | 24.29232200 | -8.57816900 | -9.31250100  | H | 27.13382800 | 1.70390800  | -15.21919500 |
| H | 22.64802200 | -7.95755300 | -9.21269600  | H | 25.15851400 | 2.50035100  | -16.80051400 |
| H | 22.33259400 | -5.39995200 | -10.04893900 | H | 25.70277400 | -1.54496300 | -15.47526700 |
| H | 26.22468900 | -6.89211800 | -10.51890800 | H | 22.77137300 | 2.03876800  | -17.23928600 |
| H | 23.58309300 | -3.82172600 | -11.62514700 | H | 23.31154700 | -2.01346500 | -15.91836900 |
| N | 23.30999200 | -5.00970500 | -7.13069100  | H | 21.11029800 | 0.46643500  | -17.11880700 |
| C | 22.40692000 | -3.96388400 | -6.62809400  | N | 30.27478700 | 0.73322100  | -17.04438700 |
| C | 23.33164600 | -2.76569100 | -6.38784400  | C | 31.68296500 | 1.10887100  | -16.98008700 |
| C | 24.48398500 | -2.98401200 | -7.37880000  | C | 32.40995600 | 0.42808600  | -15.82142700 |
| C | 24.68229100 | -4.50273800 | -7.34287100  | C | 31.90038300 | 0.94394300  | -14.47645500 |
| H | 21.92095900 | -4.31799800 | -5.71353800  | C | 32.38774600 | 2.32653400  | -14.08201100 |
| H | 22.81884100 | -1.81793700 | -6.53829300  | O | 33.39678000 | 2.77641400  | -14.79512700 |
| H | 23.71738200 | -2.78791900 | -5.36284900  | O | 31.90228100 | 2.94694800  | -13.13165700 |
| H | 24.19313000 | -2.66035600 | -8.38393900  | H | 30.04995900 | -0.15193900 | -17.47250600 |
| H | 25.39532500 | -2.44907600 | -7.10164700  | H | 31.72778000 | 2.19508100  | -16.88519000 |
| H | 25.11043600 | -4.89046400 | -8.26820700  | H | 32.24446600 | -0.65482400 | -15.87798800 |
| H | 25.34156800 | -4.78300200 | -6.51051300  | H | 33.48574400 | 0.60087800  | -15.91057600 |
| C | 23.17498400 | 4.07100100  | -8.16499700  | H | 30.80807800 | 0.95736500  | -14.45370500 |
| C | 24.47296300 | 3.92422100  | -7.39293800  | H | 32.18855700 | 0.27883000  | -13.65624700 |
| O | 24.50098200 | 3.77036900  | -6.17193100  | C | 25.84007700 | -1.93740900 | -12.23620100 |
| H | 22.78042000 | 3.07137300  | -8.36747500  | O | 25.37382500 | -2.77262100 | -13.08859600 |
| H | 23.31823700 | 4.57711400  | -9.12204800  | O | 26.56324700 | -2.32504300 | -11.27241600 |
| N | 25.61311300 | 3.93954400  | -8.14142700  | C | 25.60130200 | -0.49225000 | -12.43933100 |
| C | 26.90904800 | 3.66685200  | -7.52193500  | C | 26.61609000 | 0.45459100  | -12.20533300 |
| C | 27.90234300 | 3.86426700  | -8.66903900  | O | 27.83817300 | 0.16542900  | -11.67340500 |
| C | 27.11374400 | 3.40749900  | -9.89201300  | C | 26.38091700 | 1.79426400  | -12.52983500 |
| C | 25.70041700 | 3.93499200  | -9.61548300  | C | 25.12757600 | 2.20460000  | -12.96507000 |
| H | 26.93664200 | 2.64208900  | -7.12862700  | C | 24.09630700 | 1.27938100  | -13.14148000 |
| H | 28.14610800 | 4.92712700  | -8.76939400  | C | 24.35736000 | -0.06213700 | -12.91571100 |
| H | 28.83351600 | 3.31604600  | -8.52132100  | H | 28.15856400 | -0.79168000 | -11.76616300 |
| H | 27.52052000 | 3.79103700  | -10.82486600 | H | 27.19241000 | 2.50232100  | -12.43872600 |
| H | 27.09485300 | 2.31581100  | -9.94366400  | H | 24.96734100 | 3.25509200  | -13.16793100 |
| H | 25.58317400 | 4.95161600  | -10.01248500 | H | 23.11905600 | 1.58680000  | -13.47801600 |
| H | 24.93450700 | 3.29696700  | -10.05992000 | H | 23.58248200 | -0.79817100 | -13.08063400 |
| C | 23.37403400 | 0.46301100  | -4.62955100  | O | 26.58199300 | -5.23580000 | -14.06462700 |

|    |             |             |              |
|----|-------------|-------------|--------------|
| H  | 26.30583400 | -4.48788400 | -14.61273100 |
| H  | 27.41896200 | -5.57005700 | -14.45630400 |
| O  | 22.64526500 | -3.14860900 | -13.86284900 |
| H  | 22.17375700 | -2.28504500 | -13.90804100 |
| H  | 23.59389700 | -2.96928300 | -13.71446600 |
| O  | 20.94377900 | -1.02239100 | -14.07154500 |
| H  | 21.03263100 | -0.76874800 | -15.00547500 |
| H  | 20.04109000 | -1.40916800 | -14.00536300 |
| C  | 34.22900400 | 4.62597000  | -6.61602700  |
| C  | 33.55359800 | 3.34810900  | -6.08051100  |
| C  | 32.22719300 | 2.98651700  | -6.77899500  |
| C  | 31.89342200 | 1.48586100  | -6.62803600  |
| N  | 30.52508300 | 1.10155300  | -6.99943500  |
| C  | 30.08329400 | 1.01409400  | -8.27121500  |
| N  | 30.79444000 | 1.52142600  | -9.26685700  |
| N  | 28.86368900 | 0.49128800  | -8.51141600  |
| H  | 34.58505100 | 4.44662700  | -7.63910200  |
| H  | 34.25941400 | 2.51455300  | -6.19421600  |
| H  | 33.37097400 | 3.44198700  | -5.00331900  |
| H  | 31.40252400 | 3.58132200  | -6.37111200  |
| H  | 32.30011900 | 3.26458100  | -7.83807100  |
| H  | 32.61007200 | 0.87672100  | -7.19522500  |
| H  | 32.00785100 | 1.20026900  | -5.57981500  |
| H  | 29.97620400 | 0.61492500  | -6.30438800  |
| H  | 31.67905700 | 1.95103500  | -9.05892100  |
| H  | 30.52679600 | 1.41287700  | -10.28943600 |
| H  | 28.53259800 | -0.24189900 | -7.88891300  |
| H  | 28.58876300 | 0.36202900  | -9.48216000  |
| C  | 31.09199800 | 7.81099800  | -10.76999800 |
| C  | 30.06388000 | 7.03714500  | -9.92546600  |
| C  | 28.77665100 | 6.83315900  | -10.66926100 |
| C  | 27.56722400 | 7.44077500  | -10.44194200 |
| C  | 28.60333000 | 5.99882200  | -11.83741000 |
| C  | 27.25823400 | 6.15643800  | -12.27394800 |
| C  | 29.45009200 | 5.12687400  | -12.54565600 |
| N  | 26.64757100 | 7.03512700  | -11.39850400 |
| C  | 26.75655600 | 5.49229800  | -13.39839000 |
| C  | 28.95746100 | 4.46560500  | -13.66421200 |
| C  | 27.62642700 | 4.65510300  | -14.08994300 |
| H  | 31.16036400 | 7.35153100  | -11.76259700 |
| H  | 30.48563600 | 6.05885500  | -9.65630000  |
| H  | 29.87445600 | 7.56052100  | -8.98128800  |
| H  | 27.28186600 | 8.13876900  | -9.66770400  |
| H  | 25.69621800 | 7.35634100  | -11.46234300 |
| H  | 30.47929400 | 4.96863200  | -12.23987500 |
| H  | 25.73274200 | 5.63630500  | -13.72747100 |
| H  | 29.59762100 | 3.80898200  | -14.23985100 |
| H  | 27.29144200 | 4.13578900  | -14.98151400 |
| O  | 30.29770000 | 1.24435800  | -11.80745000 |
| H  | 30.61658000 | 2.00297500  | -12.33853100 |
| H  | 29.37500700 | 1.00549500  | -12.02278900 |
| N  | 16.94826000 | -3.33522500 | -12.67244900 |
| C  | 16.59812800 | -4.44991300 | -11.75908000 |
| C  | 15.33369600 | -3.92883700 | -11.05934600 |
| C  | 14.67928900 | -3.03016600 | -12.11948900 |
| C  | 15.87850000 | -2.33020400 | -12.76614800 |
| H  | 17.41360600 | -4.63282800 | -11.05969100 |
| H  | 14.68803900 | -4.74146100 | -10.71820600 |
| H  | 15.61389300 | -3.33197400 | -10.18405700 |
| H  | 14.15868800 | -3.64373200 | -12.86298500 |
| H  | 13.95910000 | -2.32226100 | -11.70219000 |
| H  | 15.72186600 | -2.04732100 | -13.80952900 |
| H  | 16.16856100 | -1.42277200 | -12.22115400 |
| C  | 29.55102500 | -2.94411200 | -1.16185000  |
| C  | 28.26591500 | -3.74920500 | -1.38353500  |
| C  | 28.10402300 | -4.30949600 | -2.79997800  |
| C  | 27.98216300 | -3.27529100 | -3.91089800  |
| O  | 28.15526700 | -2.07439300 | -3.77078200  |
| O  | 27.70598000 | -3.85211000 | -5.08115200  |
| H  | 29.55147800 | -2.10800700 | -1.86680000  |
| H  | 28.21552000 | -4.58734700 | -0.67740300  |
| H  | 27.40798800 | -3.10349900 | -1.16066600  |
| H  | 28.96066700 | -4.94385900 | -3.06594800  |
| H  | 27.22904200 | -4.96669500 | -2.86519200  |
| H  | 30.46536900 | -3.51013000 | -1.36804000  |
| H  | 29.56603700 | -2.49717300 | -0.16242800  |
| C  | 34.86196300 | 8.00000400  | -10.31596400 |
| C  | 35.24317900 | 6.50637800  | -10.33478500 |
| C  | 35.12906600 | 5.90218600  | -11.69701700 |
| C  | 34.22266900 | 5.03324200  | -12.25387600 |
| N  | 35.99152700 | 6.22190000  | -12.73629500 |
| C  | 35.59081100 | 5.54776000  | -13.84884200 |
| N  | 34.52266700 | 4.82199400  | -13.58557200 |
| H  | 35.56394300 | 8.59959600  | -10.90517900 |
| H  | 36.25640300 | 6.36355100  | -9.93690100  |
| H  | 34.57266800 | 5.95299500  | -9.66955000  |
| H  | 36.77988300 | 6.84851600  | -12.67602300 |
| H  | 33.37489800 | 4.53996400  | -11.80291700 |
| H  | 36.09970400 | 5.61224800  | -14.79915900 |
| H  | 33.76909600 | 3.64286900  | -14.38670700 |
| H  | 34.87102400 | 8.38159400  | -9.28968200  |
| H  | 33.87106100 | 8.09550900  | -10.77200700 |
| Mg | 26.90430300 | -4.13401400 | -12.26061100 |

# Int1-B<sub>Mg</sub> (6.7 kcal/mol)

|   |             |             |              |
|---|-------------|-------------|--------------|
| H | 20.66706200 | -6.80406200 | -16.56490400 |
| H | 16.38996600 | -5.37400800 | -12.30897200 |

|   |             |             |              |
|---|-------------|-------------|--------------|
| H | 24.65804800 | -6.75722700 | -19.16503700 |
| H | 29.36459900 | -8.34237300 | -18.18009000 |
| H | 35.11195600 | 4.87004000  | -6.01595300  |
| H | 32.10200600 | 7.76395000  | -10.35101800 |
| H | 33.92491300 | -0.02994200 | -10.21096100 |
| H | 31.95014400 | -4.27900300 | -6.58609000  |
| H | 23.18523100 | 1.49712700  | -4.32328700  |
| H | 22.41700000 | 4.62901800  | -7.60401900  |
| H | 22.25386600 | 6.38956200  | -15.14822000 |
| H | 33.53402200 | 5.46902100  | -6.68095900  |
| H | 30.78099900 | 8.84799600  | -10.93701400 |
| H | 23.93865300 | 6.30924700  | -15.81981500 |
| H | 23.80780400 | -0.12316000 | -3.81401000  |
| H | 32.79738200 | -3.33851800 | -5.29821400  |
| H | 32.07503400 | 0.82300500  | -17.96198600 |
| H | 30.43521800 | -3.27768800 | -15.73588700 |
| H | 31.70201100 | -4.16498600 | -14.93594000 |
| H | 30.41801800 | -9.06002600 | -14.20488900 |
| H | 20.88596700 | -5.05007200 | -16.84107700 |
| H | 34.15710200 | -4.71617000 | -10.10823600 |
| H | 23.72471400 | -8.30785000 | -7.05582100  |
| H | 21.59202500 | -3.72878600 | -7.31995700  |
| H | 27.89805000 | 0.15102600  | -17.74203500 |
| H | 27.15901300 | 4.34413300  | -6.69911300  |
| C | 29.55211000 | -8.45625300 | -13.91559300 |
| C | 29.06989800 | -7.65212700 | -15.10519900 |
| O | 28.83718100 | -6.43467400 | -15.08035000 |
| C | 29.81821800 | -7.57957600 | -12.69138200 |
| C | 28.50900900 | -7.18458600 | -11.98581100 |
| C | 28.77246100 | -6.06322800 | -10.98300900 |
| O | 29.46012800 | -6.32191000 | -9.98529000  |
| O | 28.29688800 | -4.89736400 | -11.26492800 |
| H | 28.76744800 | -9.18926600 | -13.67575400 |
| H | 30.46320600 | -8.09898500 | -11.97843500 |
| H | 30.35012600 | -6.67788600 | -13.01090100 |
| H | 27.75798600 | -6.88226200 | -12.71647100 |
| H | 28.12515200 | -8.05769500 | -11.44579900 |
| N | 28.95482200 | -8.36417300 | -16.23639100 |
| C | 28.69020800 | -7.77022800 | -17.53345000 |
| C | 27.22277400 | -7.98846800 | -17.90520500 |
| O | 26.74943100 | -9.11786800 | -17.91941000 |
| H | 29.04434400 | -9.36871700 | -16.20237800 |
| H | 28.99388800 | -6.72346400 | -17.50020100 |
| N | 26.51464900 | -6.85265600 | -18.13490700 |
| C | 25.05612900 | -6.83990600 | -18.14799800 |
| C | 24.52829100 | -5.70473600 | -17.27154900 |
| H | 26.98332000 | -5.96903300 | -17.99636500 |
| H | 24.73700700 | -7.81354100 | -17.76745400 |
| H | 23.43645400 | -5.68955000 | -17.28038800 |
| H | 24.86278600 | -5.82439500 | -16.23598100 |
| H | 24.86890500 | -4.72747000 | -17.63588000 |
| C | 23.25601500 | 6.03700700  | -15.04223200 |
| C | 23.13975000 | 4.50019600  | -15.03581900 |
| C | 22.20644200 | 3.94114300  | -13.98584900 |
| C | 22.35794500 | 4.26849700  | -12.63318600 |
| C | 21.22354200 | 2.99722900  | -14.31456700 |
| C | 21.59205900 | 3.65480500  | -11.64672300 |
| C | 20.45314800 | 2.36199300  | -13.34298300 |
| C | 20.64967400 | 2.68353600  | -11.99740800 |
| O | 19.90616400 | 2.02225900  | -11.06025200 |
| H | 23.65111200 | 6.41632500  | -14.09347400 |
| H | 22.78632100 | 4.18256200  | -16.02330100 |
| H | 24.13053700 | 4.04293300  | -14.92182900 |
| H | 23.11115800 | 4.99199100  | -12.33298700 |
| H | 21.09094900 | 2.71672300  | -15.35597700 |
| H | 21.74389700 | 3.90531100  | -10.60158900 |
| H | 19.75329000 | 1.57559000  | -13.60059300 |
| H | 20.27710000 | 2.21033200  | -10.18683800 |
| C | 20.86193800 | -5.83974600 | -16.08300400 |
| C | 19.77121600 | -5.54807000 | -15.05393100 |
| O | 18.77775400 | -6.25417400 | -14.92139600 |
| H | 21.84248600 | -5.85679500 | -15.59725300 |
| N | 19.99314100 | -4.42986400 | -14.28892500 |
| C | 19.19490700 | -4.19819500 | -13.09498400 |
| C | 18.14199300 | -3.10690000 | -13.25755900 |
| O | 18.37670000 | -2.04630900 | -13.85931400 |
| C | 20.16070000 | -3.85055700 | -11.93674600 |
| O | 19.50343000 | -3.65213000 | -10.69082200 |
| H | 20.91347500 | -3.99674500 | -14.33063600 |
| H | 18.69569200 | -5.14269200 | -12.87344200 |
| H | 20.83973100 | -4.69939700 | -11.81506200 |
| H | 20.76974500 | -2.98380200 | -12.20863800 |
| H | 19.21787200 | -2.73080800 | -10.64955300 |
| C | 23.90645500 | -7.35673100 | -7.56588200  |
| C | 22.89628100 | -6.30801200 | -7.13016000  |
| O | 21.73234000 | -6.62013300 | -6.87290300  |
| C | 23.71473200 | -7.68274500 | -9.07191900  |
| C | 24.12142200 | -6.59113200 | -9.99975500  |
| C | 25.32331400 | -6.32924900 | -10.60536200 |
| N | 23.30201800 | -5.53690400 | -10.37314200 |
| C | 24.01169800 | -4.69790400 | -11.17208300 |
| N | 25.24649300 | -5.15564600 | -11.33004600 |
| H | 24.94073800 | -7.05743500 | -7.38081300  |
| H | 24.30743000 | -8.56977400 | -9.31515300  |
| H | 22.66327900 | -7.94929400 | -9.22730700  |
| H | 22.35674100 | -5.38286800 | -10.05024100 |
| H | 26.23194100 | -6.90588000 | -10.54764100 |
| H | 23.59651600 | -3.82553900 | -11.65152100 |
| N | 23.30803000 | -5.01013700 | -7.13424800  |

|   |             |             |              |   |             |             |              |
|---|-------------|-------------|--------------|---|-------------|-------------|--------------|
| C | 22.40691300 | -3.96390100 | -6.62808100  | N | 30.27395000 | 0.73888000  | -16.99609600 |
| C | 23.33089600 | -2.76368100 | -6.39564000  | C | 31.68299500 | 1.10898900  | -16.98007800 |
| C | 24.47415600 | -2.98182200 | -7.39635800  | C | 32.43804200 | 0.42231800  | -15.83543900 |
| C | 24.67685600 | -4.49939600 | -7.35659000  | C | 31.95585400 | 0.83534200  | -14.43354000 |
| H | 21.92349300 | -4.31735200 | -5.71214400  | C | 32.55488000 | 2.11233500  | -13.87959500 |
| H | 22.81562300 | -1.81677600 | -6.54369700  | O | 32.84205600 | 3.01137900  | -14.81511600 |
| H | 23.72492600 | -2.78297300 | -5.37369800  | O | 32.75223900 | 2.29669800  | -12.68358900 |
| H | 24.17268800 | -2.66310900 | -8.39986100  | H | 30.04048900 | -0.20642900 | -17.26081600 |
| H | 25.38775600 | -2.44506100 | -7.13346100  | H | 31.72773700 | 2.19274400  | -16.87628500 |
| H | 25.10266800 | -4.88970500 | -8.28171300  | H | 32.31589300 | -0.66475500 | -15.93846100 |
| H | 25.34165300 | -4.77411800 | -6.52639500  | H | 33.50853200 | 0.62679700  | -15.94673700 |
| C | 23.17500000 | 4.07098900  | -8.16497000  | H | 30.86856800 | 0.96932600  | -14.40909300 |
| C | 24.47453000 | 3.92832500  | -7.39520000  | H | 32.15821500 | 0.05450100  | -13.69770100 |
| O | 24.50275800 | 3.77467200  | -6.17421300  | C | 25.84983700 | -1.88506600 | -12.24394100 |
| H | 22.78133100 | 3.07070300  | -8.36422800  | O | 25.36981700 | -2.73840600 | -13.08658200 |
| H | 23.31449200 | 4.57328200  | -9.12487200  | O | 26.61667600 | -2.28857600 | -11.31810600 |
| N | 25.61526000 | 3.94639700  | -8.14353100  | C | 25.56154300 | -0.45375700 | -12.43073300 |
| C | 26.90897700 | 3.66682000  | -7.52190300  | C | 26.57385600 | 0.52202900  | -12.23744700 |
| C | 27.91024700 | 3.84836100  | -8.66422400  | O | 27.80204000 | 0.24300200  | -11.81060600 |
| C | 27.11912900 | 3.42128100  | -9.89754800  | C | 26.24658000 | 1.85744000  | -12.55745000 |
| C | 25.70244600 | 3.94099100  | -9.61655700  | C | 24.96694700 | 2.21561800  | -12.94775600 |
| H | 26.92360800 | 2.64469600  | -7.12077900  | C | 23.96194000 | 1.25379000  | -13.09070600 |
| H | 28.18576800 | 4.90419200  | -8.75279400  | C | 24.28505500 | -0.07304600 | -12.86502100 |
| H | 28.82349500 | 3.27124000  | -8.51391500  | H | 28.51970900 | -0.92308100 | -12.04658500 |
| H | 27.53099200 | 3.82338200  | -10.82171900 | H | 27.01888500 | 2.61066200  | -12.48783700 |
| H | 27.10082900 | 2.33228500  | -9.97721800  | H | 24.75630600 | 3.25939600  | -13.13918700 |
| H | 25.57438300 | 4.95617600  | -10.01289400 | H | 22.96288200 | 1.52289800  | -13.39381500 |
| H | 24.94157200 | 3.29705300  | -10.06123300 | H | 23.53071400 | -0.83714200 | -12.99435600 |
| C | 23.37402500 | 0.46301000  | -4.62956000  | O | 26.62715600 | -5.15836400 | -14.14730900 |
| C | 24.32518700 | 0.45609900  | -5.83257100  | H | 26.33821600 | -4.45082000 | -14.73991500 |
| C | 23.69828800 | 0.59676400  | -7.20534200  | H | 27.45177300 | -5.53254300 | -14.52993900 |
| C | 22.31969700 | 0.55242600  | -7.44250300  | O | 22.65305700 | -3.15363700 | -13.82629200 |
| C | 24.54720200 | 0.71229400  | -8.31746800  | H | 22.16687300 | -2.29730600 | -13.87060200 |
| C | 21.80958200 | 0.57004600  | -8.74637400  | H | 23.59970800 | -2.94839800 | -13.69458800 |
| C | 24.04564400 | 0.76031900  | -9.61344600  | O | 20.94625900 | -1.03169100 | -14.02014900 |
| C | 22.66805200 | 0.67085700  | -9.83967900  | H | 21.06516200 | -0.75745000 | -14.94511000 |
| H | 22.41447700 | -0.01255800 | -4.85220400  | H | 20.03863400 | -1.40970900 | -13.98654600 |
| H | 25.05267400 | 1.26479700  | -5.70873700  | C | 34.22901500 | 4.62592800  | -6.61609500  |
| H | 24.90625800 | -0.47446700 | -5.83692100  | C | 33.55062100 | 3.29024700  | -6.27181500  |
| H | 21.62815600 | 0.48657400  | -6.61028900  | C | 32.35150100 | 2.95255100  | -7.19519500  |
| H | 25.62190900 | 0.75705600  | -8.15759800  | C | 32.16129300 | 1.42840500  | -7.36775400  |
| H | 20.73706600 | 0.47707100  | -8.90191500  | N | 30.83071900 | 0.99758500  | -7.80628700  |
| H | 24.72349100 | 0.84754600  | -10.44959400 | C | 30.30111200 | 1.13454700  | -9.04351300  |
| H | 22.28480500 | 0.67264400  | -10.85287100 | N | 30.89985500 | 1.86356900  | -9.98696600  |
| C | 32.20530300 | -3.28051900 | -6.21769600  | N | 29.10749900 | 0.57762500  | -9.27261300  |
| C | 30.92124100 | -2.44913600 | -6.03660800  | H | 34.62379700 | 4.53235600  | -7.64018000  |
| C | 29.97695900 | -2.56382600 | -7.20506500  | H | 34.30452300 | 2.49633700  | -6.35714500  |
| C | 30.08196200 | -3.39868400 | -8.29113300  | H | 33.21365100 | 3.27536000  | -5.22877100  |
| N | 28.75948400 | -1.87826300 | -7.27235800  | H | 31.42864700 | 3.38261800  | -6.79164200  |
| C | 28.16217700 | -2.32134800 | -8.38754500  | H | 32.50287300 | 3.42206500  | -8.17538800  |
| N | 28.93065400 | -3.22816200 | -9.02599500  | H | 32.92978600 | 1.01974200  | -8.03782900  |
| H | 32.82628200 | -2.84087900 | -7.00011600  | H | 32.31403100 | 0.93907700  | -6.40251200  |
| H | 30.38816100 | -2.76593900 | -5.13144000  | H | 30.36086900 | 0.31457900  | -7.22398400  |
| H | 31.18220800 | -1.39457400 | -5.85822900  | H | 31.85874400 | 2.14365200  | -9.86591800  |
| H | 27.86142200 | -2.61639300 | -5.73793500  | H | 30.50855900 | 1.89645000  | -10.95865800 |
| H | 30.85991200 | -4.08050500 | -8.59139200  | H | 28.76796500 | -0.09833100 | -8.59390000  |
| H | 27.20711200 | -1.99891200 | -8.77883600  | H | 28.67936400 | 0.54536100  | -10.20611400 |
| H | 28.68626900 | -3.75619400 | -9.87405500  | C | 31.09200000 | 7.81102500  | -10.76997600 |
| C | 33.48011900 | -4.18184600 | -10.78257900 | C | 30.05703300 | 6.97550000  | -9.99942900  |
| C | 33.34791600 | -2.73781700 | -10.32580400 | C | 28.83458900 | 6.70320000  | -10.82964000 |
| O | 33.04682500 | -2.40208000 | -9.18492300  | C | 27.56054400 | 7.16782400  | -10.62054400 |
| C | 32.15435200 | -4.96084600 | -10.76474800 | C | 28.79211400 | 5.93377200  | -12.05504200 |
| O | 32.01780700 | -5.61048000 | -9.52227500  | C | 27.45212300 | 5.97829300  | -12.53617600 |
| H | 33.91663600 | -4.21879700 | -11.78734100 | C | 29.75099600 | 5.21657800  | -12.79554100 |
| H | 31.30699600 | -4.28314800 | -10.94978100 | N | 26.72414900 | 6.73405400  | -11.63896600 |
| H | 32.16554400 | -5.69037100 | -11.59179700 | C | 27.05657800 | 5.33741000  | -13.71584200 |
| H | 31.11626300 | -5.99490800 | -9.52236700  | C | 29.36761300 | 4.59434800  | -13.98122300 |
| N | 33.57356200 | -1.80342700 | -11.29434000 | C | 28.03078700 | 4.65263300  | -14.43353000 |
| C | 33.30513300 | -0.40198000 | -11.03309900 | H | 31.19794300 | 7.38642100  | -11.77569300 |
| H | 33.70949500 | -2.10286500 | -12.24640500 | H | 30.51697700 | 6.01977400  | -9.71251300  |
| H | 33.52250300 | 0.19458700  | -11.91642800 | H | 29.77238700 | 7.47169900  | -9.06481200  |
| H | 32.25450800 | -0.25009400 | -10.77234500 | H | 27.17546300 | 7.77989500  | -9.81743700  |
| C | 30.70391400 | -3.79274000 | -14.83755600 | H | 25.74449500 | 6.94940300  | -11.71834100 |
| C | 30.70526700 | -2.86748200 | -13.62559600 | H | 30.78095400 | 5.14921300  | -12.45707500 |
| C | 29.34524800 | -2.43971900 | -13.12441600 | H | 26.02871700 | 5.38297000  | -14.06320000 |
| O | 28.30350600 | -2.99863400 | -13.51590100 | H | 30.09345000 | 4.06318800  | -14.58791900 |
| O | 29.41428700 | -1.47753600 | -12.26479900 | H | 27.78971500 | 4.15394700  | -15.36518200 |
| H | 30.02548200 | -4.63270200 | -14.69832300 | O | 29.73859400 | 1.87653200  | -12.43938700 |
| H | 31.18656600 | -3.35983000 | -12.77331400 | H | 29.42709300 | 2.74705700  | -12.72704400 |
| H | 31.29007500 | -1.95999900 | -13.80420500 | H | 28.94036200 | 1.28987800  | -12.32425400 |
| C | 27.87493200 | 1.06298000  | -17.13693600 | N | 16.94772900 | -3.33586800 | -12.67274400 |
| C | 29.25761500 | 1.63839800  | -16.90779200 | C | 16.59812200 | -4.44990700 | -11.75907500 |
| O | 29.43124700 | 2.82590500  | -16.64026800 | C | 15.33348200 | -3.92889300 | -11.05973900 |
| C | 27.13342800 | 0.80910900  | -15.80701000 | C | 14.67791800 | -3.03279600 | -12.12137500 |
| C | 25.67685100 | 0.50426800  | -16.04924300 | C | 15.87615600 | -2.33301300 | -12.77019100 |
| C | 24.82428600 | 1.51016100  | -16.51629600 | H | 17.41360200 | -4.63277600 | -11.05972300 |
| C | 25.14354200 | -0.77001300 | -15.83788900 | H | 14.68867000 | -4.74148100 | -10.71687700 |
| C | 23.47756900 | 1.25904700  | -16.76086800 | H | 15.61349900 | -3.33015600 | -10.18567500 |
| C | 23.79792600 | -1.04174600 | -16.07826200 | H | 14.15734300 | -3.64829300 | -12.86330300 |
| C | 22.96838900 | -0.01840900 | -16.53142000 | H | 13.95737800 | -2.32465900 | -11.70511200 |
| O | 21.62831100 | -0.31205000 | -16.70882500 | H | 15.71921400 | -2.05408400 | -13.81458500 |
| H | 27.32311600 | 1.81255000  | -17.71084500 | H | 16.16473900 | -1.42325400 | -12.22842100 |
| H | 27.60709200 | -0.01195200 | -15.25860100 | C | 29.55106300 | -2.94493100 | -11.16092400 |
| H | 27.22985700 | 1.69907700  | -15.17788400 | C | 28.26165700 | -3.72883300 | -1.42598500  |
| H | 25.21309000 | 2.51219200  | -16.67637400 | C | 28.07520200 | -4.12587800 | -2.89545200  |
| H | 25.77068700 | -1.55048200 | -15.41864800 | C | 27.88536000 | -2.95550700 | -3.84955300  |
| H | 22.82486800 | 2.05451900  | -17.11118400 | O | 27.87776200 | -1.78198000 | -3.53366700  |
| H | 23.37583000 | -2.01673200 | -15.86231400 | O | 27.74505000 | -3.38053400 | -5.11795000  |
| H | 21.17315600 | 0.47803500  | -17.02839400 | H | 29.56915100 | -2.09187600 | -1.84734900  |



|    |             |             |              |
|----|-------------|-------------|--------------|
| H  | 28.22832700 | -4.63799300 | -0.81372200  |
| H  | 27.40800100 | -3.11258100 | -1.12224600  |
| H  | 28.93604200 | -4.69937300 | -3.26271100  |
| H  | 27.21086300 | -4.79020300 | -3.01790700  |
| H  | 30.46537100 | -3.50996700 | -1.36848000  |
| C  | 29.56599900 | -2.49659100 | -0.16268800  |
| C  | 34.86194500 | 7.99996200  | -10.31594800 |
| C  | 35.27687200 | 6.51984100  | -10.40198400 |
| C  | 35.02526200 | 5.97698900  | -11.77245200 |
| C  | 34.18792300 | 4.99482300  | -12.23968100 |
| N  | 35.58409500 | 6.53434000  | -12.91509800 |
| C  | 35.07472400 | 5.88542200  | -13.99914400 |
| N  | 34.22891400 | 4.94988100  | -13.61990500 |
| H  | 35.54572000 | 8.63139400  | -10.89566400 |
| H  | 36.32830500 | 6.39526900  | -10.11138900 |
| H  | 34.68835700 | 5.92412900  | -9.69731200  |
| H  | 36.24309400 | 7.29747600  | -12.93824200 |
| H  | 33.57111200 | 4.29436900  | -11.69822400 |
| H  | 35.34684200 | 6.12567400  | -15.01638900 |
| H  | 33.33000400 | 3.79591700  | -14.38902200 |
| H  | 34.87103700 | 8.38161700  | -9.28969100  |
| H  | 33.87106300 | 8.09554800  | -10.77200700 |
| Mg | 26.84611800 | -4.07371400 | -12.34556100 |

### TS1-B<sub>Mg</sub> (46.5 kcal/mol)

|   |             |             |              |
|---|-------------|-------------|--------------|
| H | 20.66705300 | -6.80405600 | -16.56491100 |
| H | 16.38990300 | -5.37396500 | -12.30902200 |
| H | 24.65803900 | -6.75726900 | -19.16503700 |
| H | 29.36458200 | -8.34239600 | -18.18008800 |
| H | 35.11183800 | 4.87010900  | -6.01580900  |
| H | 32.10201200 | 7.76393100  | -10.35102700 |
| H | 33.92491500 | -0.02993300 | -10.21096800 |
| H | 31.95010600 | -4.27903600 | -6.58597300  |
| H | 23.18524400 | 1.49712300  | -4.32326500  |
| H | 22.41704300 | 4.62909000  | -7.60403300  |
| H | 22.25386900 | 6.38956300  | -15.14824500 |
| H | 33.53414100 | 5.46913800  | -6.68069500  |
| H | 30.78099900 | 8.84799500  | -10.93702300 |
| H | 23.93863600 | 6.30931600  | -15.81980600 |
| H | 23.80779600 | -0.12317700 | -3.81401700  |
| H | 32.79729200 | -3.33858200 | -5.29816100  |
| H | 32.07501300 | 0.82297300  | -17.96198500 |
| H | 30.43545400 | -3.27780300 | -15.73602200 |
| H | 31.70195500 | -4.16529500 | -14.93533400 |
| H | 30.41807900 | -9.05983300 | -14.20511000 |
| H | 20.88599200 | -5.05006500 | -16.84106900 |
| H | 34.15717400 | -4.71610700 | -10.10826000 |
| H | 23.72447000 | -8.30782700 | -7.05586600  |
| H | 21.59203500 | -3.72878600 | -7.31996900  |
| H | 27.89807500 | 0.15101700  | -17.74202000 |
| H | 27.15893700 | 4.34428400  | -6.69921400  |
| C | 29.55202300 | -8.45656100 | -13.91530600 |
| C | 29.06060600 | -7.64870100 | -15.09850300 |
| O | 28.79451100 | -6.43937700 | -15.06565400 |
| C | 29.79183300 | -7.61066000 | -12.66295900 |
| C | 28.48112700 | -7.36886600 | -11.90062300 |
| C | 28.66409200 | -6.34631100 | -10.78046800 |
| O | 29.53855300 | -6.55561700 | -9.92736900  |
| O | 27.88439200 | -5.32207300 | -10.79265100 |
| H | 28.77104600 | -9.20138300 | -13.69745500 |
| H | 30.50402600 | -8.10153200 | -11.99571500 |
| H | 30.22842700 | -6.65053400 | -12.95418700 |
| H | 27.69390600 | -7.05138300 | -12.58680500 |
| H | 28.15749500 | -8.31472700 | -11.44680100 |
| N | 28.96474800 | -8.35840200 | -16.23569100 |
| C | 28.69023500 | -7.77016300 | -17.53343900 |
| C | 27.22285300 | -7.98872500 | -17.90588100 |
| O | 26.74966100 | -9.11788600 | -17.93185000 |
| H | 29.08422200 | -9.35967500 | -16.20364500 |
| H | 28.99141400 | -6.72215100 | -17.50628400 |
| N | 26.51473400 | -6.85094300 | -18.13127400 |
| C | 25.05614900 | -6.83985900 | -18.14800600 |
| C | 24.52497700 | -5.70897400 | -17.26740200 |
| H | 26.97997000 | -5.96938800 | -17.96898300 |
| H | 24.73707300 | -7.81464300 | -17.76984600 |
| H | 23.43314000 | -5.69241200 | -17.28214300 |
| H | 24.85340500 | -5.83874100 | -16.23099300 |
| H | 24.86947100 | -4.72923000 | -17.62127300 |
| C | 23.25610900 | 6.03675600  | -15.04210900 |
| C | 23.27134900 | 4.49073900  | -15.06296600 |
| C | 22.44683900 | 3.77826500  | -14.01949000 |
| C | 22.60351600 | 4.04353600  | -12.65451000 |
| C | 21.56828100 | 2.74912300  | -14.38623500 |
| C | 21.90565500 | 3.31589700  | -11.69385100 |
| C | 20.87375700 | 1.99781600  | -13.44237000 |
| C | 21.03801900 | 2.29178800  | -12.08686200 |
| O | 20.33268900 | 1.55188900  | -11.17951400 |
| H | 23.64880200 | 6.42479600  | -14.09516500 |
| H | 22.93839800 | 4.16046800  | -16.05410200 |
| H | 24.31511600 | 4.15264000  | -14.98411500 |
| H | 23.29143100 | 4.81981000  | -12.32844700 |
| H | 21.45539000 | 2.50400600  | -15.43859300 |
| H | 22.04299200 | 3.52938200  | -10.63900800 |
| H | 20.25923000 | 1.15448800  | -13.73522800 |
| H | 20.65981900 | 1.76347900  | -10.29435100 |
| C | 20.86191000 | -5.83974700 | -16.08299600 |
| C | 19.76458300 | -5.54406700 | -15.06217400 |

|   |             |             |              |
|---|-------------|-------------|--------------|
| O | 18.75440400 | -6.22897200 | -14.94790600 |
| H | 21.84043400 | -5.85414400 | -15.59384900 |
| N | 19.99912800 | -4.43765500 | -14.28402100 |
| C | 19.19499800 | -4.19828300 | -13.09491700 |
| C | 18.13292900 | -3.12124200 | -13.28168500 |
| O | 18.35953600 | -2.07778000 | -13.91531900 |
| C | 20.16528900 | -3.80977700 | -11.95517700 |
| O | 19.52770500 | -3.62717400 | -10.69676400 |
| H | 20.93221000 | -4.03248100 | -14.30708800 |
| H | 18.71009900 | -5.14454900 | -12.84977200 |
| H | 20.87612600 | -4.63156400 | -11.84034600 |
| H | 20.73583000 | -2.92185900 | -12.24790800 |
| H | 19.17476900 | -2.72880100 | -10.66903400 |
| C | 23.90676800 | -7.35667600 | -7.56586300  |
| C | 22.93580100 | -6.30899800 | -7.05154200  |
| O | 21.80673100 | -6.63630600 | -6.67921900  |
| C | 23.48808400 | -7.72815800 | -9.01913800  |
| C | 23.82817200 | -6.68477000 | -10.01134500 |
| C | 25.00072300 | -6.49678700 | -10.68734000 |
| N | 23.06587000 | -5.56107700 | -10.29234000 |
| C | 23.79135100 | -4.74602100 | -11.10411600 |
| N | 24.97029900 | -5.29343000 | -11.35387000 |
| H | 24.96062500 | -7.08084700 | -7.51521700  |
| H | 24.00299300 | -8.64950500 | -9.30755600  |
| H | 22.41532100 | -7.94793600 | -9.00724800  |
| H | 22.16056700 | -5.34651100 | -9.89775400  |
| H | 25.87122600 | -7.13178600 | -10.70331600 |
| H | 23.42966500 | -3.81962200 | -11.51943200 |
| N | 23.30777900 | -5.00436000 | -7.14522100  |
| C | 22.40686800 | -3.96390700 | -6.62804900  |
| C | 23.33806400 | -2.77343800 | -6.39263900  |
| C | 24.43359300 | -2.95667700 | -7.45154400  |
| C | 24.65117700 | -4.47438500 | -7.46259500  |
| H | 21.92753900 | -4.32731100 | -5.71497300  |
| H | 22.81994200 | -1.82176800 | -6.47899500  |
| H | 23.77709000 | -2.83565300 | -5.39066900  |
| H | 24.08372400 | -2.61197200 | -8.43021900  |
| H | 25.35308500 | -2.41775800 | -7.21828300  |
| H | 25.00943400 | -4.83965600 | -8.42692800  |
| H | 25.37799600 | -4.76273600 | -6.69195300  |
| C | 23.17495300 | 4.07090500  | -8.16495300  |
| C | 24.47233500 | 3.92610700  | -7.39009600  |
| O | 24.49573900 | 3.78307500  | -6.16808900  |
| H | 22.78281000 | 3.06668700  | -8.35884700  |
| H | 23.31474100 | 4.57187700  | -9.12518300  |
| N | 25.61162800 | 3.93269200  | -8.13879700  |
| C | 26.90907900 | 3.66666400  | -7.52183800  |
| C | 27.90487300 | 3.88022500  | -8.66107800  |
| C | 27.12399700 | 3.42743200  | -9.88780900  |
| C | 25.69189300 | 3.90287000  | -9.61139600  |
| H | 26.94438800 | 2.64174800  | -7.13064200  |
| H | 28.14691500 | 4.94414200  | -8.74836300  |
| H | 28.83520800 | 3.32936000  | -8.51632500  |
| H | 27.51824900 | 3.84163500  | -10.81295800 |
| H | 27.14370900 | 2.33790100  | -9.95367600  |
| H | 25.52694500 | 4.90488200  | -10.02797700 |
| H | 24.95148400 | 3.22230400  | -10.03922700 |
| C | 23.37401600 | 0.46303700  | -4.62957400  |
| C | 24.39995700 | 0.46194100  | -5.78353900  |
| C | 23.89335400 | 0.51646400  | -7.21208600  |
| C | 22.54393300 | 0.41307200  | -7.56439300  |
| C | 24.83517700 | 0.57239000  | -8.25415400  |
| C | 22.15325000 | 0.30734700  | -8.90403100  |
| C | 24.45036200 | 0.49991400  | -9.59058200  |
| C | 23.10097500 | 0.35248800  | -9.92703300  |
| H | 22.42641600 | -0.01442300 | -4.89168100  |
| H | 25.08337700 | 1.30443600  | -5.63591900  |
| H | 25.01952900 | -0.44128100 | -5.71044200  |
| H | 21.78456800 | 0.38126200  | -6.79064200  |
| H | 25.89102500 | 0.65011100  | -8.00643200  |
| H | 21.10510500 | 0.14492600  | -9.14107300  |
| H | 25.19981100 | 0.53812600  | -10.37089100 |
| H | 22.80411400 | 0.26881700  | -10.96631700 |
| C | 32.20544700 | -3.28041900 | -6.21784800  |
| C | 30.91038400 | -2.47047900 | -6.03147700  |
| C | 29.93900800 | -2.65862900 | -7.16585000  |
| C | 29.98293000 | -3.60155900 | -8.16465800  |
| N | 28.74369300 | -1.93890600 | -7.27059300  |
| C | 28.10056100 | -2.46711000 | -8.32262500  |
| N | 28.81509600 | -3.46230200 | -8.88143100  |
| H | 32.81696500 | -2.83579800 | -7.00434200  |
| H | 30.41100700 | -2.76091100 | -5.09779800  |
| H | 31.15213600 | -1.40495400 | -5.90430500  |
| H | 27.81823300 | -2.68177000 | -5.73676100  |
| H | 30.73390200 | -4.32463800 | -8.43985700  |
| H | 27.16052100 | -2.13117900 | -8.73566000  |
| H | 28.50083400 | -4.08737000 | -9.63899400  |
| C | 33.48002600 | -4.18195000 | -10.78252500 |
| C | 33.32963300 | -2.74040600 | -10.32513100 |
| O | 33.00331100 | -2.40657300 | -9.19009600  |
| C | 32.15447700 | -4.96594600 | -10.77158600 |
| O | 32.03808700 | -5.65094500 | -9.54522100  |
| H | 33.91961500 | -4.21284300 | -11.78603200 |
| H | 31.30392600 | -4.28450500 | -10.93308100 |
| H | 32.15883500 | -5.67300900 | -11.61716000 |
| H | 31.16871100 | -6.10320300 | -9.56944000  |
| N | 33.56179700 | -1.80495000 | -11.29090000 |
| C | 33.30513600 | -0.40196800 | -11.03308700 |
| H | 33.73065600 | -2.10364400 | -12.23789300 |

|   |             |             |              |
|---|-------------|-------------|--------------|
| H | 33.52486900 | 0.19393000  | -11.91571000 |
| H | 32.25750700 | -0.23732200 | -10.76643300 |
| C | 30.70353000 | -3.79203900 | -14.83814000 |
| C | 30.44293300 | -2.75395500 | -13.72038200 |
| C | 28.92639600 | -2.59619400 | -13.54192400 |
| O | 28.35681200 | -3.56661000 | -12.99141500 |
| O | 28.34665000 | -1.54963400 | -14.00072900 |
| H | 30.04359100 | -4.65093400 | -14.71274100 |
| H | 30.83791500 | -3.08883400 | -12.75701500 |
| H | 30.89224000 | -1.78889700 | -13.96578100 |
| C | 27.87492600 | 1.06298600  | -17.13694800 |
| C | 29.25286700 | 1.59907500  | -16.80753000 |
| O | 29.41875200 | 2.75295200  | -16.41378400 |
| C | 27.00668700 | 0.80666700  | -15.90057800 |
| C | 25.64322200 | 0.29468600  | -16.29412100 |
| C | 24.67293900 | 1.17032100  | -16.78985000 |
| C | 25.30208500 | -1.05530100 | -16.14634100 |
| C | 23.39031300 | 0.72474000  | -17.10402000 |
| C | 24.02121200 | -1.51837400 | -16.44238600 |
| C | 23.06608300 | -0.61928700 | -16.91750500 |
| O | 21.79475000 | -1.10610500 | -17.16038100 |
| H | 27.39667000 | 1.82831500  | -17.75862700 |
| H | 27.51458600 | 0.08562000  | -15.25988700 |
| H | 26.91346700 | 1.73373200  | -15.33053500 |
| H | 24.90959900 | 2.22528200  | -16.90088900 |
| H | 26.03131700 | -1.74055300 | -15.72417600 |
| H | 22.64085500 | 1.42243300  | -17.47155000 |
| H | 23.72992900 | -2.54409600 | -16.24407100 |
| H | 21.25898100 | -0.39989000 | -17.54579900 |
| N | 30.27644000 | 0.72631800  | -16.99653500 |
| C | 31.68301900 | 1.10903500  | -16.98007200 |
| C | 32.46605300 | 0.41286600  | -15.86172800 |
| C | 32.03153900 | 0.81774500  | -14.44543600 |
| C | 32.64905200 | 2.09506100  | -13.91146800 |
| O | 32.86319200 | 3.01623000  | -14.84731300 |
| O | 32.92323300 | 2.26365900  | -12.72977300 |
| H | 30.04526800 | -0.20438600 | -17.30953500 |
| H | 31.72439400 | 2.19200300  | -16.86808900 |
| H | 32.33422200 | -0.67216700 | -15.96834800 |
| H | 33.53387400 | 0.61273500  | -16.00552800 |
| H | 30.94395600 | 0.93639700  | -14.39181700 |
| H | 32.26527100 | 0.03369200  | -13.72309900 |
| C | 26.00112100 | -2.10470500 | -12.17120200 |
| O | 25.44749300 | -2.94006100 | -12.98263400 |
| O | 26.50985000 | -2.48479300 | -11.09101200 |
| C | 26.13488000 | -0.70472600 | -12.70400000 |
| C | 27.03683000 | 0.30437300  | -12.12824300 |
| O | 28.09434200 | -0.00714700 | -11.50526200 |
| C | 26.74190800 | 1.67304100  | -12.47339400 |
| C | 25.53624600 | 2.04237600  | -13.00290500 |
| C | 24.55364700 | 1.07929600  | -13.36289000 |
| C | 24.87000000 | -0.23838200 | -13.25776000 |
| H | 27.09384300 | -1.12877400 | -13.51542500 |
| H | 27.47714400 | 2.42262600  | -12.22997300 |
| H | 25.33159500 | 3.09683100  | -13.15581600 |
| H | 23.59216400 | 1.38916800  | -13.74588500 |
| H | 24.15125200 | -0.99002600 | -13.54911400 |
| O | 26.51542800 | -5.40788100 | -13.96664200 |
| H | 26.15410700 | -4.65811900 | -14.46118200 |
| H | 27.36623400 | -5.65041500 | -14.39285700 |
| O | 22.74664500 | -3.27419700 | -13.91268900 |
| H | 22.29366300 | -2.40805000 | -14.00181400 |
| H | 23.67873800 | -3.11555300 | -13.67386800 |
| O | 20.96517700 | -1.24494000 | -14.40719600 |
| H | 21.08192200 | -1.28120800 | -15.37113000 |
| H | 20.04883700 | -1.56675600 | -14.24884700 |
| C | 34.22894800 | 4.62570000  | -6.61657100  |
| C | 33.56672400 | 3.32082000  | -6.15420500  |
| C | 32.31497400 | 2.93756700  | -6.96966200  |
| C | 32.11729000 | 1.41012100  | -7.01960500  |
| N | 30.79039000 | 0.96978500  | -7.44653200  |
| C | 30.29419300 | 1.06790500  | -8.69845500  |
| N | 30.93617100 | 1.76337800  | -9.64099300  |
| N | 29.09901200 | 0.52170400  | -8.94040900  |
| H | 34.60137700 | 4.48189700  | -7.64101300  |
| H | 34.31077200 | 2.51717100  | -6.23683700  |
| H | 33.30165900 | 3.37635200  | -5.09180200  |
| H | 31.41889000 | 3.40011400  | -6.54207800  |
| H | 32.40768800 | 3.34189000  | -7.98460900  |
| H | 32.89002800 | 0.94407200  | -7.64737200  |
| H | 32.25387600 | 0.99931200  | -6.01605700  |
| H | 30.30571800 | 0.31144000  | -6.84969300  |
| H | 31.89199400 | 2.03355000  | -9.48239500  |
| H | 30.59716900 | 1.77649800  | -10.63089500 |
| H | 28.78735200 | -0.18981200 | -8.27427500  |
| H | 28.76685100 | 0.40061400  | -9.90450600  |
| C | 31.09199900 | 7.81104000  | -10.76996000 |
| C | 30.06445300 | 7.00351300  | -9.95830500  |
| C | 28.83124300 | 6.72203700  | -10.76567400 |
| C | 27.57337700 | 7.24276800  | -10.59669200 |
| C | 28.77637000 | 5.89420000  | -11.95017800 |
| C | 27.44812800 | 5.96815400  | -12.45633500 |
| C | 29.72060500 | 5.10532700  | -12.63418300 |
| N | 26.73364100 | 6.78637000  | -11.60378000 |
| C | 27.05281700 | 5.29632500  | -13.61854300 |
| C | 29.33497600 | 4.44343100  | -13.79649100 |
| C | 28.01186600 | 4.54012400  | -14.28217100 |
| H | 31.18043600 | 7.36780900  | -11.76851700 |
| H | 30.52049600 | 6.05223600  | -9.65196300  |

|    |             |             |              |
|----|-------------|-------------|--------------|
| H  | 29.80044400 | 7.52971500  | -9.03416200  |
| H  | 27.20143100 | 7.91007800  | -9.83236300  |
| H  | 25.77094100 | 7.05372200  | -11.72321000 |
| H  | 30.74295300 | 5.02401500  | -12.27563600 |
| H  | 26.03854600 | 5.37991800  | -13.99776100 |
| H  | 30.05263300 | 3.87433300  | -14.37836000 |
| H  | 27.77483400 | 4.02015500  | -15.20260200 |
| O  | 30.03436600 | 1.66300400  | -12.17946200 |
| H  | 29.66179500 | 2.47127700  | -12.56050900 |
| H  | 29.29399500 | 1.01292200  | -12.07032900 |
| N  | 16.94672600 | -3.33793300 | -12.67604900 |
| C  | 16.59821100 | -4.44989700 | -11.75908700 |
| C  | 15.33238200 | -3.92772800 | -11.06369900 |
| C  | 14.67174000 | -3.04731600 | -12.13544100 |
| C  | 15.86527000 | -2.34768000 | -12.79386500 |
| H  | 17.41342100 | -4.63226300 | -11.05903300 |
| H  | 14.69191900 | -4.73969100 | -10.71143300 |
| H  | 15.61010500 | -3.31789900 | -10.19653100 |
| H  | 14.15423500 | -3.67455100 | -12.86957300 |
| H  | 13.94717900 | -2.33877300 | -11.72702700 |
| H  | 15.70821000 | -2.08916200 | -13.84347800 |
| H  | 16.14375300 | -1.42563000 | -12.26801900 |
| C  | 29.55100600 | -2.94479800 | -1.16124300  |
| C  | 28.26261700 | -3.73320700 | -1.41765300  |
| C  | 28.07357000 | -4.14741600 | -2.88165500  |
| C  | 27.88154400 | -2.99103000 | -3.85082800  |
| O  | 27.90696200 | -1.81093800 | -3.55916900  |
| O  | 27.69886600 | -3.43506800 | -5.10677600  |
| H  | 29.56543200 | -2.09400400 | -1.85013500  |
| H  | 28.23192400 | -4.63583800 | -0.79571500  |
| H  | 27.40819000 | -3.11572400 | -1.11813200  |
| H  | 28.93530100 | -4.72313200 | -3.24384400  |
| H  | 27.21111300 | -4.81539800 | -2.99526300  |
| H  | 30.46541100 | -3.50998700 | -1.36824800  |
| H  | 29.56603500 | -2.49671100 | -0.16263500  |
| C  | 34.86193100 | 7.99994700  | -10.31596000 |
| C  | 35.28449300 | 6.52314400  | -10.41585000 |
| C  | 35.03716500 | 5.99355900  | -11.79311600 |
| C  | 34.22653700 | 4.99334200  | -12.26910300 |
| N  | 35.57229300 | 6.58276700  | -12.93144200 |
| C  | 35.07472400 | 5.93350700  | -14.02108000 |
| N  | 34.25945400 | 4.96806700  | -13.65040600 |
| H  | 35.54203500 | 8.63793200  | -10.89332400 |
| H  | 36.33640600 | 6.40188500  | -10.12539700 |
| H  | 34.69886300 | 5.91623300  | -9.71830000  |
| H  | 36.20907100 | 7.36460000  | -12.94848500 |
| H  | 33.63819500 | 4.26451300  | -11.73343000 |
| H  | 35.33280400 | 6.19647600  | -15.03642500 |
| H  | 33.35848500 | 3.79858700  | -14.43052300 |
| H  | 34.87105100 | 8.38162600  | -9.28969500  |
| H  | 33.87105700 | 8.09554900  | -10.77199500 |
| Mg | 26.73820800 | -4.37138500 | -12.10234700 |

### Int2-B<sub>Mg</sub> (30.8 kcal/mol)

|   |             |             |              |
|---|-------------|-------------|--------------|
| H | 20.66707300 | -6.80405000 | -16.56493100 |
| H | 16.38993600 | -5.37395800 | -12.30904700 |
| H | 24.65803900 | -6.75726400 | -19.16503400 |
| H | 29.36458900 | -8.34239100 | -18.18008400 |
| H | 35.11186000 | 4.87008700  | -6.01583300  |
| H | 32.10200600 | 7.76398400  | -10.35100600 |
| H | 33.92491100 | -0.02993500 | -10.21096400 |
| H | 31.95010800 | -4.27903300 | -6.58598200  |
| H | 23.18525300 | 1.49712100  | -4.32325300  |
| H | 22.41704800 | 4.62908900  | -7.60402500  |
| H | 22.25385400 | 6.38957300  | -15.14806600 |
| H | 33.53413400 | 5.46913000  | -6.68072300  |
| H | 30.78100200 | 8.84800000  | -10.93699800 |
| H | 23.93872700 | 6.30932900  | -15.81972100 |
| H | 32.80778900 | -0.12318900 | -3.81402200  |
| H | 32.79729800 | -3.33856400 | -5.29816400  |
| H | 32.07501500 | 0.82295900  | -17.96198000 |
| H | 30.43544200 | -3.27780300 | -15.73601800 |
| H | 31.70195400 | -4.16530000 | -14.93533100 |
| H | 30.41807500 | -9.05982700 | -14.20513300 |
| H | 20.88599900 | -5.05004200 | -16.84104400 |
| H | 34.15717800 | -4.71610500 | -10.10826300 |
| H | 23.72441900 | -8.30780900 | -7.05585100  |
| H | 21.59202500 | -3.72878600 | -7.31995700  |
| H | 27.89809500 | 0.15103400  | -17.74204500 |
| H | 27.15895500 | 4.34420000  | -6.69915000  |
| C | 29.55202300 | -8.45656600 | -13.91526700 |
| C | 29.00323300 | -7.65510700 | -15.08102800 |
| O | 28.59133000 | -6.49033000 | -15.01128900 |
| C | 29.79803200 | -7.60184600 | -12.66891400 |
| C | 28.48064000 | -7.28162900 | -11.95094400 |
| C | 28.67875100 | -6.32013400 | -10.78028600 |
| O | 29.55093200 | -6.57894100 | -9.94107000  |
| O | 27.89505700 | -5.29876900 | -10.73736800 |
| H | 28.78077700 | -9.20500000 | -13.67234500 |
| H | 30.46177900 | -8.11877700 | -11.97186300 |
| H | 30.29661900 | -6.67029500 | -12.95601500 |
| H | 27.75359800 | -6.87531700 | -12.65592800 |
| H | 28.06277800 | -8.21501700 | -11.54954400 |
| N | 29.01254200 | -8.34000200 | -16.23985400 |
| C | 28.69022600 | -7.77016700 | -17.53345100 |
| C | 27.21707500 | -7.99827100 | -17.88104000 |
| O | 26.73711200 | -9.12418200 | -17.88088100 |

|   |             |             |              |   |             |             |              |
|---|-------------|-------------|--------------|---|-------------|-------------|--------------|
| H | 29.25932400 | -9.31738400 | -16.22005200 | H | 20.62038100 | 0.60821300  | -8.79727600  |
| H | 28.97914300 | -6.71720200 | -17.53280700 | H | 24.57529000 | 0.63624200  | -10.47195900 |
| N | 26.51434900 | -6.86053200 | -18.13133100 | H | 22.10774800 | 0.62194500  | -10.80075000 |
| C | 25.05615100 | -6.83986800 | -18.14800700 | C | 32.20543600 | -3.28044200 | -6.21784100  |
| C | 24.53730700 | -5.67918700 | -17.29712000 | C | 30.93816800 | -2.44351000 | -6.01090300  |
| H | 26.98093800 | -5.98056500 | -17.96285200 | C | 29.96222000 | -2.61780800 | -7.13454400  |
| H | 24.72501000 | -7.80430900 | -17.75450300 | C | 29.99991800 | -3.56206500 | -8.13114200  |
| H | 23.44472900 | -5.66873000 | -17.29233300 | N | 28.76144600 | -1.90943800 | -7.21279700  |
| H | 24.89233900 | -5.75257900 | -16.26391700 | C | 28.09458900 | -2.45670800 | -8.23775900  |
| H | 24.87292000 | -4.71635400 | -17.70182900 | N | 28.81088300 | -3.44411600 | -8.81310400  |
| C | 23.25602800 | 6.03672100  | -15.04241000 | H | 32.82195700 | -2.84106900 | -7.00374200  |
| C | 23.22114700 | 4.49939800  | -14.96284800 | H | 30.43922400 | -2.72561300 | -5.07411000  |
| C | 22.30509000 | 3.92846400  | -13.90199300 | H | 31.20726500 | -1.38409800 | -5.87962500  |
| C | 22.29701600 | 4.42155100  | -12.59096300 | H | 27.84616500 | -2.64252400 | -5.70406900  |
| C | 21.49723900 | 2.81706900  | -14.17928400 | H | 30.75443100 | -4.27454900 | -8.42300300  |
| C | 21.51698300 | 3.83116200  | -11.59902600 | H | 27.14201400 | -2.12688700 | -8.61954300  |
| C | 20.71898800 | 2.20478800  | -13.20108100 | H | 28.50267800 | -4.07510700 | -9.56324200  |
| C | 20.72521000 | 2.71880500  | -11.90172100 | C | 33.48001600 | -4.18195400 | -10.78252000 |
| O | 19.94565100 | 2.10073100  | -10.96514100 | C | 33.34384900 | -2.73854500 | -10.32588600 |
| H | 23.64912300 | 6.46423900  | -14.11213100 | O | 33.03435700 | -2.40255000 | -9.18699800  |
| H | 22.91514000 | 4.10281100  | -15.93837100 | C | 32.14764600 | -4.95434000 | -10.75388100 |
| H | 24.24248200 | 4.12268100  | -14.80262700 | O | 32.03836800 | -5.62851400 | -9.51992100  |
| H | 22.91820100 | 5.27312600  | -12.32792800 | H | 33.91129700 | -4.22001300 | -11.78926100 |
| H | 21.49953600 | 2.39832400  | -15.18108200 | H | 31.29995100 | -4.26935400 | -10.91235900 |
| H | 21.52521800 | 4.22848500  | -10.58835100 | H | 32.14085200 | -5.66971400 | -11.59267300 |
| H | 20.14809700 | 1.31023100  | -13.42349300 | H | 31.16966300 | -6.08066500 | -9.53567400  |
| C | 20.23886800 | 2.37711200  | -10.08582400 | N | 33.56994400 | -1.80346300 | -11.29402200 |
| C | 20.86188100 | -5.83981400 | -16.08301200 | C | 33.30514300 | -0.40196300 | -11.03309300 |
| C | 19.76843900 | -5.54863800 | -15.05543200 | H | 33.71343200 | -2.10310300 | -12.24499600 |
| O | 18.78041500 | -6.25995800 | -14.91776600 | H | 33.51948100 | 0.19831500  | -11.91424800 |
| H | 21.84181200 | -5.86228600 | -15.59588500 | H | 32.25806800 | -0.24773000 | -10.75973700 |
| N | 19.98145700 | -4.42034200 | -14.30013200 | C | 30.70354700 | -3.79203600 | -14.83814800 |
| C | 19.19502700 | -4.19823100 | -13.09493600 | C | 30.49195000 | -2.80698900 | -13.67261800 |
| C | 18.14213300 | -3.10735900 | -13.25297300 | C | 28.98930000 | -2.72293300 | -13.44312000 |
| O | 18.37604600 | -2.04722600 | -13.85971600 | O | 28.54982900 | -3.08617500 | -12.31361600 |
| C | 20.17156800 | -3.85908000 | -11.94338000 | O | 28.24998000 | -2.43000400 | -14.43607000 |
| O | 19.54972500 | -3.80332900 | -10.66464100 | H | 30.04716100 | -4.66061400 | -14.73837100 |
| O | 20.90633600 | -3.99208400 | -14.33174500 | H | 30.97217000 | -3.13271200 | -12.74890500 |
| H | 18.70176700 | -5.14538200 | -12.87105200 | H | 30.88404300 | -1.81832400 | -13.93438600 |
| H | 20.91784900 | -4.65627800 | -11.90620900 | C | 27.87489300 | 1.06297700  | -17.13692200 |
| H | 20.69814300 | -2.92526300 | -12.16398000 | C | 29.25688900 | 1.66583800  | -16.97016700 |
| H | 19.22987200 | -2.90388900 | -10.52200500 | O | 29.42972000 | 2.87459700  | -16.82375200 |
| C | 23.90683700 | -7.35671400 | -7.56587900  | C | 27.20879600 | 0.73143800  | -15.78674200 |
| C | 22.92028400 | -6.30934200 | -7.07743600  | C | 25.81487400 | 0.20275600  | -16.01891200 |
| O | 21.77496000 | -6.63091300 | -6.75317400  | C | 24.76688800 | 1.08060500  | -16.31636500 |
| C | 23.58001000 | -7.68659600 | -9.05414200  | C | 25.55128700 | -1.17236700 | -16.02553600 |
| C | 23.92171300 | -6.60751300 | -10.02000800 | C | 25.49098200 | 0.60929700  | -16.61447100 |
| C | 25.06887000 | -6.40387900 | -10.73768600 | C | 24.27956400 | -1.66061800 | -16.33414300 |
| N | 23.14259800 | -5.48556400 | -10.27355300 | C | 23.25285900 | -0.76471700 | -16.63091000 |
| C | 23.83673900 | -4.65761500 | -11.09729400 | O | 21.99816600 | -1.28251600 | -16.91363200 |
| N | 25.01399800 | -5.18905000 | -11.39539300 | H | 27.26915200 | 1.79850700  | -17.67291100 |
| H | 24.95456900 | -7.07114900 | -7.45627700  | H | 27.80860400 | -0.00790200 | -15.24812900 |
| H | 24.13878100 | -8.58141100 | -9.34437800  | H | 27.17890100 | 1.64018900  | -15.17960600 |
| H | 22.51575800 | -7.94171500 | -9.10721100  | H | 24.94797400 | 2.15174800  | -16.30732200 |
| H | 22.24765700 | -5.27904300 | -9.85075500  | H | 26.35486600 | -1.86102900 | -15.78413800 |
| H | 25.94189900 | -7.03237400 | -10.78496200 | H | 22.68562000 | 1.30489900  | -16.83578900 |
| H | 23.45939100 | -3.71710100 | -11.46517100 | H | 24.08202300 | -2.72754700 | -16.38382700 |
| N | 23.30991300 | -5.00710000 | -7.13470900  | H | 21.49331600 | -0.61750700 | -17.40141400 |
| C | 22.40686600 | -3.96389300 | -6.62805600  | N | 30.26920500 | 0.75697800  | -16.98076900 |
| C | 23.32715700 | -2.75817200 | -6.41345800  | C | 31.68302400 | 1.10904300  | -16.98007800 |
| C | 24.45033900 | -2.96733200 | -7.43873300  | C | 32.42795400 | 0.42246500  | -15.83124200 |
| C | 24.66579400 | -4.48402300 | -7.41084700  | C | 31.94686400 | 0.86111300  | -14.43356700 |
| H | 21.92805600 | -4.31523500 | -5.70970300  | C | 32.59570200 | 2.12118500  | -13.90097100 |
| H | 22.80245900 | -1.81397700 | -6.54873000  | O | 32.65541400 | 3.10455500  | -14.79642000 |
| H | 23.74219400 | -2.77681400 | -5.39975700  | O | 33.03378400 | 2.22472100  | -12.76281100 |
| H | 24.13681700 | -2.64471000 | -8.43643200  | H | 30.02522300 | -0.21556900 | -17.10071200 |
| H | 25.36443800 | -2.42637700 | -7.19064300  | H | 31.73775100 | 2.19327700  | -16.88106000 |
| H | 25.05793400 | -4.86680000 | -8.35455700  | H | 32.29028600 | -0.66364300 | -15.92000400 |
| H | 25.36333700 | -4.75903600 | -6.60872800  | H | 33.50252500 | 0.60669400  | -15.94250300 |
| C | 23.17494700 | 4.07089100  | -8.16495100  | H | 30.86504100 | 1.03331500  | -14.43882800 |
| C | 24.47729600 | 3.95099400  | -7.39585300  | H | 32.12633200 | 0.07824100  | -13.69519300 |
| O | 24.51095700 | 3.84789300  | -6.17021100  | C | 26.35572900 | -1.31967800 | -11.05680300 |
| H | 22.78759500 | 3.06621900  | -8.35401500  | O | 26.03990800 | -2.55265000 | -10.96449000 |
| H | 23.30916200 | 4.56233700  | -9.13168600  | O | 26.73647600 | -0.56909600 | -10.15698500 |
| N | 25.61514200 | 3.94170600  | -8.15056100  | C | 26.16098800 | -0.71988100 | -12.50783000 |
| C | 26.90906300 | 3.66677200  | -7.52189000  | C | 26.83358900 | 0.61870300  | -12.58443200 |
| C | 27.89994400 | 3.76025200  | -8.68418700  | O | 28.06864000 | 0.66097600  | -12.43500700 |
| C | 27.08860000 | 3.23485600  | -9.87370100  | C | 26.01265400 | 1.78734700  | -12.80382000 |
| C | 25.68306600 | 3.80226200  | -9.61921900  | C | 24.67526700 | 1.64936000  | -13.02383300 |
| H | 26.90184700 | 2.65365700  | -7.09504200  | C | 24.00703200 | 0.37043900  | -13.06874700 |
| H | 28.17888700 | 4.80409700  | -8.86067700  | C | 24.71045500 | -0.75569400 | -12.83354500 |
| H | 28.81146000 | 3.19006500  | -8.49862600  | H | 26.72446500 | -1.39608100 | -13.16636800 |
| H | 27.49908500 | 3.54812200  | -10.83526000 | H | 26.49249900 | 2.76003400  | -12.81017400 |
| H | 27.05112400 | 2.14179000  | -9.85868000  | H | 24.06886600 | 2.53346800  | -13.16904800 |
| H | 25.56230800 | 4.77951200  | -10.10307500 | H | 22.94728200 | 0.33572000  | -13.29435800 |
| H | 24.90357000 | 3.13383400  | -9.99000700  | H | 24.22508500 | -1.72407900 | -12.83246000 |
| C | 23.37401900 | 0.46305700  | -4.62957400  | O | 26.71434900 | -4.50404600 | -13.95215900 |
| C | 24.30483400 | 0.46135900  | -5.84623800  | H | 27.20346900 | -3.70229200 | -14.30748100 |
| C | 23.64104900 | 0.58999900  | -7.20277400  | H | 27.22158600 | -5.26733000 | -14.28808300 |
| C | 22.25390100 | 0.62967000  | -7.39327700  | O | 22.59027300 | -3.13820000 | -13.75995700 |
| C | 24.45766700 | 0.60282200  | -8.34236200  | H | 22.07199200 | -2.29991600 | -13.87195700 |
| C | 21.70104000 | 0.63406700  | -8.67897800  | H | 23.34496100 | -3.04968800 | -14.35553200 |
| C | 23.91251900 | 0.63490600  | -9.62113200  | O | 20.89995200 | -1.10316800 | -14.26563100 |
| C | 22.52803800 | 0.63525000  | -9.80220000  | H | 21.06746600 | -1.15869300 | -15.22129800 |
| H | 22.41258600 | -0.01302500 | -8.44424100  | H | 19.98561300 | -1.45833500 | -14.13822000 |
| H | 25.02526300 | 1.27950400  | -5.74030200  | C | 34.22892800 | 4.62572900  | -6.61651600  |
| H | 24.89794200 | -0.46068800 | -5.86196200  | C | 33.55613400 | 3.30231600  | -6.20909300  |
| H | 21.58866000 | 0.63975000  | -6.53756100  | C | 32.33447900 | 2.92266600  | -7.08324800  |
| H | 25.53628400 | 0.54915900  | -8.23545500  | C | 32.16632800 | 1.39077800  | -7.20366400  |

|    |             |             |              |   |             |             |              |
|----|-------------|-------------|--------------|---|-------------|-------------|--------------|
| N  | 30.8666500  | 0.92213400  | -7.69744100  | H | 32.10198800 | 7.76408400  | -10.35096200 |
| C  | 30.40371100 | 1.07066700  | -8.95849800  | H | 33.92494300 | -0.02994800 | -10.21098000 |
| N  | 31.04142800 | 1.84121300  | -9.84113900  | H | 31.94951700 | -4.27861900 | -6.58669800  |
| N  | 29.24837100 | 0.48520300  | -9.28137800  | H | 23.18505000 | 1.49693200  | -4.32274300  |
| H  | 34.61231900 | 4.50502800  | -7.64102100  | H | 22.41699200 | 4.62900700  | -7.60401800  |
| H  | 34.30970300 | 2.50679000  | -6.28217600  | H | 22.25410300 | 6.39038000  | -15.14770600 |
| H  | 33.24995000 | 3.32989600  | -5.15690700  | H | 33.53401100 | 5.46901200  | -6.68094900  |
| H  | 31.41620300 | 3.35087100  | -6.66737200  | H | 30.78104100 | 8.84801300  | -10.93699800 |
| H  | 32.45212700 | 3.36942200  | -8.07752600  | H | 23.93794400 | 6.31003000  | -15.82016800 |
| H  | 32.97558400 | 0.96785900  | -7.81570300  | H | 23.80807100 | -0.12266300 | -3.81379600  |
| H  | 32.27341700 | 0.94439800  | -6.21191400  | H | 32.79670700 | -3.33983100 | -5.29786500  |
| H  | 30.40999600 | 0.18913800  | -7.16567200  | H | 32.07487100 | 0.82265900  | -17.96195200 |
| H  | 31.99061700 | 2.11662300  | -9.65680500  | H | 30.43510100 | -3.27790900 | -15.73597800 |
| H  | 30.66151500 | 2.01375700  | -10.80227200 | H | 31.70222600 | -4.16434100 | -14.93620000 |
| H  | 28.81296900 | -0.16620400 | -8.63301300  | H | 30.41802300 | -9.05988300 | -14.20517500 |
| H  | 28.89007000 | 0.47287100  | -10.23019200 | H | 20.88592700 | -5.04998000 | -16.84098200 |
| C  | 31.09200500 | 7.81099400  | -10.76999700 | H | 34.15698700 | -4.71598600 | -10.10797700 |
| C  | 30.05565500 | 6.95927600  | -10.02477400 | H | 23.72515600 | -8.30785200 | -7.05566700  |
| C  | 28.84392100 | 6.68067700  | -10.86962900 | H | 21.59184700 | -3.72889700 | -7.31978500  |
| C  | 27.54508500 | 7.03557400  | -10.60378700 | H | 27.89763000 | 0.15105900  | -17.74210300 |
| C  | 28.82353900 | 5.98186800  | -12.13749500 | H | 27.15901100 | 4.34388500  | -6.69890900  |
| C  | 27.46914200 | 5.94232000  | -12.57605000 | C | 29.55203600 | -8.45629400 | -13.91500600 |
| C  | 29.80909900 | 5.38626500  | -12.95106000 | C | 29.06555300 | -7.64752600 | -15.10154100 |
| N  | 26.71441500 | 6.59811900  | -11.62414200 | O | 28.84968400 | -6.42992800 | -15.07967100 |
| C  | 27.08501800 | 5.32175700  | -13.77056400 | C | 29.83721400 | -7.60116500 | -12.67868400 |
| C  | 29.43259100 | 4.77139900  | -14.14357000 | C | 28.55853700 | -7.24674300 | -11.90617900 |
| C  | 28.08047400 | 4.73484100  | -14.54540600 | C | 28.87374900 | -6.24210700 | -10.79073500 |
| H  | 31.21150100 | 7.40167800  | -11.78010000 | O | 29.70835100 | -6.59323800 | -9.93977100  |
| H  | 30.52205700 | 6.00445000  | -9.74411800  | O | 28.28369100 | -5.10078400 | -10.81858200 |
| H  | 29.75352600 | 7.43884800  | -9.08704500  | H | 28.76754200 | -9.19052600 | -13.67768200 |
| H  | 27.13832000 | 7.56454300  | -9.75377400  | H | 30.51532100 | -8.12511900 | -12.00099200 |
| H  | 25.71812600 | 6.73322200  | -11.66063200 | H | 30.34157100 | -6.68116700 | -12.99166900 |
| H  | 30.85545900 | 5.39932200  | -12.65886300 | H | 27.79595800 | -6.86344500 | -12.58565100 |
| H  | 26.04487300 | 5.30641900  | -14.08300300 | H | 28.16090000 | -8.16019600 | -11.44586300 |
| H  | 30.17479200 | 4.29476900  | -14.77523600 | N | 28.92268400 | -8.36706500 | -16.23148800 |
| H  | 27.84270900 | 4.24111300  | -15.48120400 | C | 28.68983300 | -7.77110800 | -17.53382800 |
| O  | 30.02217400 | 2.33584900  | -12.27129900 | C | 27.23260500 | -7.97752000 | -17.95243100 |
| H  | 29.82175500 | 3.25475700  | -12.49993800 | O | 26.77255700 | -9.10715400 | -18.06564100 |
| H  | 29.19381000 | 1.81841600  | -12.42679300 | H | 29.01512100 | -9.37100600 | -16.19534500 |
| N  | 16.95039400 | -3.33205700 | -12.66669100 | H | 28.99770400 | -6.72573700 | -17.49007500 |
| C  | 16.59815800 | -4.44991200 | -11.75904000 | N | 26.51591500 | -6.83479700 | -18.12042600 |
| C  | 15.33290300 | -3.93041500 | -11.05973400 | C | 25.05604000 | -6.83991900 | -18.14808200 |
| C  | 14.67782600 | -3.03379400 | -12.12123400 | C | 24.51113900 | -5.71527400 | -17.26771700 |
| C  | 15.87582200 | -2.33149700 | -12.76785000 | H | 26.96248100 | -5.96660000 | -17.86097500 |
| H  | 17.41286900 | -4.63982800 | -11.06057200 | H | 24.74081600 | -7.81833300 | -17.77480400 |
| H  | 14.68858700 | -4.74407100 | -10.71893700 | H | 23.41974500 | -5.70892800 | -17.28441700 |
| H  | 15.61081600 | -3.33263700 | -10.18431800 | H | 24.83548200 | -5.83465300 | -16.22935900 |
| H  | 14.15875600 | -3.64890800 | -12.86441200 | H | 24.84610100 | -4.73268100 | -17.62264400 |
| H  | 13.95621200 | -2.32686200 | -11.70510300 | C | 23.25674600 | 6.03497800  | -15.04229300 |
| H  | 15.72144000 | -2.05440200 | -13.81303300 | C | 23.17430100 | 4.49613500  | -15.02950800 |
| H  | 16.16185400 | -1.42116600 | -12.22620300 | C | 22.25950700 | 3.92335400  | -13.97318700 |
| C  | 29.55101300 | -2.94481000 | -1.16122900  | C | 22.46714400 | 4.19440500  | -12.61533300 |
| C  | 28.26445900 | -3.74135000 | -1.40268000  | C | 21.22601100 | 3.03769100  | -14.30667000 |
| C  | 28.06167800 | -4.15040500 | -2.86523400  | C | 21.70260200 | 3.58113300  | -11.62850700 |
| C  | 27.85885200 | -2.98307800 | -3.81940700  | C | 20.45248300 | 2.40807000  | -13.33318900 |
| O  | 27.83554100 | -1.80991400 | -3.50126200  | C | 20.70060700 | 2.67285700  | -11.98376700 |
| O  | 27.72582400 | -3.40830900 | -5.08648900  | O | 19.94624900 | 2.02218200  | -11.04922400 |
| H  | 29.55798500 | -2.09597100 | -1.85220400  | H | 23.64657200 | 6.42211900  | -14.09482600 |
| H  | 28.24788300 | -4.64491600 | -0.78145100  | H | 22.82855600 | 4.16113600  | -16.01415300 |
| H  | 27.41022200 | -3.12911300 | -1.09252900  | H | 24.17859200 | 4.06963600  | -14.91305200 |
| H  | 28.91915900 | -4.72379500 | -3.23995400  | H | 23.26283600 | 4.87105900  | -12.31523400 |
| H  | 27.19672900 | -4.81648000 | -2.97383400  | H | 21.04709600 | 2.80747400  | -15.35364000 |
| H  | 30.46541000 | -3.50998600 | -1.36825800  | H | 21.89684000 | 3.78360900  | -10.58087500 |
| H  | 29.56602800 | -2.49670100 | -0.16263900  | H | 19.67992700 | 1.69311700  | -13.59568400 |
| C  | 34.86193200 | 7.99993800  | -10.31595900 | H | 20.33219600 | 2.18323900  | -10.17683300 |
| C  | 35.28073500 | 6.52308900  | -10.43134500 | C | 20.86191400 | -5.83991500 | -16.08290600 |
| C  | 34.98430700 | 6.00978000  | -11.80529900 | H | 19.86281500 | -5.65677200 | -14.94782500 |
| C  | 34.14534300 | 5.02579100  | -12.26523800 | O | 19.26955000 | -6.61290500 | -14.46010900 |
| N  | 35.47324600 | 6.61850100  | -12.95423500 | H | 21.85678500 | -5.85654900 | -15.62403400 |
| C  | 34.92231400 | 5.99658100  | -14.03382800 | N | 19.71894400 | -4.37954800 | -14.45271100 |
| N  | 34.11638200 | 5.02968500  | -13.64689900 | C | 19.19480600 | -4.19824000 | -13.09530400 |
| H  | 35.54018500 | 8.64041700  | -10.89283100 | C | 18.19027000 | -3.05385700 | -13.10498000 |
| H  | 36.34089600 | 6.39746500  | -10.17562300 | O | 18.47755700 | -1.93859400 | -13.57523800 |
| H  | 34.71528100 | 5.91262200  | -9.72052500  | C | 20.38705900 | -3.98058400 | -12.13250700 |
| H  | 36.11539100 | 7.39558600  | -12.98347000 | O | 20.09356200 | -4.33425300 | -10.77541800 |
| H  | 33.58127000 | 4.28710500  | -11.71751700 | H | 20.34292400 | -3.65090200 | -14.78339600 |
| H  | 35.13741600 | 6.27823700  | -15.05412900 | H | 18.72362800 | -5.14675700 | -12.84162300 |
| H  | 33.18697000 | 3.87383700  | -14.40007300 | H | 21.18804700 | -4.63854300 | -12.47503800 |
| H  | 34.87105000 | 8.38162800  | -9.28969600  | H | 20.75705000 | -2.95281700 | -12.20512300 |
| H  | 33.87106000 | 8.09554600  | -10.77200000 | H | 19.88016100 | -3.53216100 | -10.28422200 |
| Mg | 26.83760000 | -4.10573800 | -11.89216900 | C | 23.90574100 | -7.35677100 | -7.56610400  |
|    |             |             |              | C | 22.92482700 | -6.30727900 | -7.06889300  |
|    |             |             |              | O | 21.78531900 | -6.62677000 | -6.72493400  |
|    |             |             |              | C | 23.57380500 | -7.67495500 | -9.05219600  |
|    |             |             |              | C | 23.99572800 | -6.61132100 | -10.00185700 |
|    |             |             |              | C | 25.24397000 | -6.35086100 | -10.50400100 |
|    |             |             |              | N | 23.19514400 | -5.58190200 | -10.47403200 |
|    |             |             |              | C | 23.96451400 | -4.75870700 | -11.23306300 |
|    |             |             |              | N | 25.21228500 | -5.20234900 | -11.26190800 |
|    |             |             |              | H | 24.95502600 | -7.07586500 | -7.45820000  |
|    |             |             |              | H | 24.08361000 | -8.60227000 | -9.33178300  |
|    |             |             |              | H | 22.49847800 | -7.86761400 | -9.12433700  |
|    |             |             |              | H | 22.20708500 | -5.44084100 | -10.28607500 |
|    |             |             |              | H | 26.15901500 | -6.89825000 | -10.34441300 |
|    |             |             |              | H | 23.58881400 | -3.91375000 | -11.78481800 |
|    |             |             |              | N | 23.31133500 | -5.00335500 | -7.13653800  |
|    |             |             |              | C | 22.40719100 | -3.96386600 | -6.62833100  |
|    |             |             |              | C | 23.32722300 | -2.76112900 | -6.39509900  |
|    |             |             |              | C | 24.46120900 | -2.96563000 | -7.41002600  |

The transition states and intermediates involved in the reaction pathway with **Mode-B** for the Zn-enzyme of SDC.

#### E:S-B<sub>Zn</sub> (0.7 kcal/mol)

|   |             |             |              |
|---|-------------|-------------|--------------|
| H | 20.66712700 | -6.80403900 | -16.56497400 |
| H | 16.38996900 | -5.37394900 | -12.30907600 |
| H | 24.65797200 | -6.75707800 | -19.16499700 |
| H | 29.36510800 | -8.34186900 | -18.18000400 |
| H | 35.11194200 | 4.87001700  | -6.01592200  |

|   |             |             |              |    |             |             |              |
|---|-------------|-------------|--------------|----|-------------|-------------|--------------|
| C | 24.67240700 | -4.48330300 | -7.38711400  | C  | 31.87605800 | 0.91793300  | -14.47441500 |
| H | 21.92513800 | -4.32064100 | -5.71343700  | C  | 32.34728600 | 2.30074300  | -14.06257100 |
| H | 22.80626900 | -1.81476700 | -6.52688200  | O  | 33.34146600 | 2.77578300  | -14.77975400 |
| H | 23.73250900 | -2.79061800 | -5.37780900  | O  | 31.86254700 | 2.89819600  | -13.09705300 |
| H | 24.14824800 | -2.63798200 | -8.40714000  | H  | 30.04972700 | -0.13823800 | -17.50314300 |
| H | 25.37339700 | -2.42459000 | -7.14797400  | H  | 31.73194700 | 2.19502200  | -16.88050800 |
| H | 25.07724000 | -4.86308500 | -8.32586500  | H  | 32.23930800 | -0.66321500 | -15.88997200 |
| H | 25.35647500 | -4.76218600 | -6.57459100  | H  | 33.47663700 | 0.59697500  | -15.89698900 |
| C | 23.17500300 | 4.07098200  | -8.16494800  | H  | 30.78338200 | 0.92265100  | -14.46081200 |
| C | 24.47280200 | 3.92442100  | -7.39236800  | H  | 32.16370200 | 0.24682200  | -13.65896000 |
| O | 24.50061800 | 3.77603900  | -6.17072600  | C  | 25.80862600 | -2.00337900 | -12.32084300 |
| H | 22.78042100 | 3.07167100  | -8.36871300  | O  | 25.37431500 | -2.82097700 | -13.19136000 |
| H | 23.31985000 | 4.57960900  | -9.12049100  | O  | 26.50352300 | -2.37389000 | -11.32373000 |
| N | 25.61214700 | 3.93611500  | -8.14180300  | C  | 25.55856500 | -0.55369900 | -12.50581300 |
| C | 26.90900700 | 3.66713400  | -7.52215500  | C  | 26.56035700 | 0.39626800  | -12.23267200 |
| C | 27.89984500 | 3.85605400  | -8.67266400  | O  | 27.77928400 | 0.10174900  | -11.69343400 |
| C | 27.11003100 | 3.38239300  | -9.88912600  | C  | 26.32305500 | 1.74064900  | -12.53170500 |
| C | 25.69641100 | 3.91152100  | -9.61623500  | C  | 25.07495600 | 2.14905100  | -12.98230900 |
| H | 26.93675600 | 2.64303300  | -7.12651500  | C  | 24.05398000 | 1.22037100  | -13.19970600 |
| H | 28.13963100 | 4.91851500  | -8.78559200  | C  | 24.31962700 | -0.12577600 | -13.00020100 |
| H | 28.83301900 | 3.31237500  | -8.52065700  | H  | 28.06078400 | -0.86113100 | -11.74976200 |
| H | 27.51473600 | 3.75501000  | -10.82746300 | H  | 27.12725800 | 2.45251300  | -12.41180800 |
| H | 27.09221800 | 2.28986000  | -9.92752900  | H  | 24.91247000 | 3.20187000  | -13.16820400 |
| H | 25.57688700 | 4.92249200  | -10.02660800 | H  | 23.08339200 | 1.53368900  | -13.55336800 |
| H | 24.93070400 | 3.26579400  | -10.05003900 | H  | 23.56045900 | -0.86763900 | -13.21878500 |
| C | 23.37391600 | 0.46277700  | -4.63050100  | Zn | 26.95661000 | -4.30163900 | -12.07949900 |
| C | 24.32797600 | 0.45663200  | -5.83337600  | O  | 26.53875000 | -5.34825100 | -13.99965500 |
| C | 23.70923900 | 0.58734600  | -7.21192500  | H  | 26.18024800 | -4.53262600 | -14.38221500 |
| C | 22.33190400 | 0.54840100  | -7.45673900  | H  | 27.39289000 | -5.52467100 | -14.44483400 |
| C | 24.56493800 | 0.68062600  | -8.32145800  | O  | 22.95040900 | -3.71143100 | -14.24910700 |
| C | 21.82939400 | 0.54869500  | -8.76374000  | H  | 22.33663300 | -2.95387200 | -14.20504700 |
| C | 24.07164900 | 0.70820100  | -9.62179600  | H  | 23.80641800 | -3.35787300 | -13.94232400 |
| C | 22.69505300 | 0.62531000  | -9.85396100  | O  | 21.07245900 | -1.64513800 | -14.33315100 |
| H | 22.41519800 | -0.01350800 | -4.85460200  | H  | 21.10986900 | -1.24257500 | -15.21739900 |
| H | 25.05092100 | 1.26983500  | -5.71038100  | H  | 20.12875900 | -1.63112100 | -14.05135200 |
| H | 24.91126100 | -0.47244000 | -5.83281100  | C  | 34.22904800 | 4.62597100  | -6.61615300  |
| H | 21.63576800 | 0.49807000  | -6.62721200  | C  | 33.55530800 | 3.34758600  | -6.08078200  |
| H | 25.63897900 | 0.71910800  | -8.15632000  | C  | 32.23251100 | 2.98063700  | -6.78253300  |
| H | 20.75730700 | 0.45876700  | -8.92381500  | C  | 31.89619700 | 1.48238200  | -6.61587400  |
| H | 24.75400100 | 0.77497300  | -10.45697200 | N  | 30.52480300 | 1.09905500  | -6.97607400  |
| H | 22.31811700 | 0.61511000  | -10.86979600 | C  | 30.07418100 | 1.00110000  | -8.24315900  |
| C | 32.20724500 | -3.27932200 | -6.21713300  | N  | 30.77843000 | 1.49360400  | -9.25091800  |
| C | 30.90840300 | -2.47564700 | -5.98924600  | N  | 28.84820500 | 0.48381700  | -8.46780900  |
| C | 30.02067500 | -2.43731600 | -7.20674100  | H  | 34.58552300 | 4.44699700  | -7.63916000  |
| C | 30.39687600 | -2.42661400 | -8.53070100  | H  | 34.26374400 | 2.51571300  | -6.19044500  |
| N | 28.62749600 | -2.48441600 | -7.14478800  | H  | 33.36860400 | 3.44304300  | -5.00437600  |
| C | 28.19922900 | -2.53927800 | -8.40912300  | H  | 31.40677100 | 3.58115700  | -6.38523200  |
| N | 29.23941000 | -2.49306600 | -9.26681200  | H  | 32.31128800 | 3.24591100  | -7.84454200  |
| H | 32.82692700 | -2.82423400 | -6.99308600  | H  | 32.60768900 | 0.86561700  | -7.18121100  |
| H | 30.33625100 | -2.90444900 | -5.16313400  | H  | 32.01526100 | 1.20595400  | -5.56572300  |
| H | 31.16172800 | -1.45403300 | -5.66246800  | H  | 29.97642300 | 0.62459000  | -6.27228100  |
| H | 27.91104400 | -3.20818600 | -5.83184000  | H  | 31.67013600 | 1.91585000  | -9.05817300  |
| H | 31.37588100 | -2.42848300 | -8.97300300  | H  | 30.50202300 | 1.36492000  | -10.26832100 |
| H | 27.17500100 | -2.61157000 | -8.74295800  | H  | 28.52589200 | -0.25026000 | -7.84079200  |
| H | 29.17642100 | -2.49582400 | -10.29185900 | H  | 28.57497700 | 0.33951300  | -9.43594700  |
| C | 33.47997700 | -4.18194900 | -10.78301800 | C  | 31.09196500 | 7.81092100  | -10.77002100 |
| C | 33.54698100 | -2.73058800 | -10.33194400 | C  | 30.06782900 | 7.04192200  | -9.91609800  |
| O | 33.60939000 | -2.38369800 | -9.15416000  | C  | 28.77366800 | 6.83795800  | -10.64722100 |
| C | 32.08612800 | -4.81318600 | -10.65134900 | C  | 27.56890700 | 7.45246500  | -10.41389500 |
| O | 31.78991200 | -5.02756500 | -9.30014300  | C  | 28.58572400 | 5.99252400  | -11.80500000 |
| H | 33.83939600 | -4.28207500 | -11.81328100 | C  | 27.23666000 | 6.15013500  | -12.22900000 |
| H | 31.33346600 | -4.16406000 | -11.12995000 | C  | 29.42219000 | 5.10995700  | -12.51234800 |
| H | 32.09059800 | -5.75610700 | -11.22158000 | N  | 26.63793900 | 7.04001100  | -11.35649900 |
| H | 30.93332600 | -5.51440100 | -9.29806900  | C  | 26.72073600 | 5.47441600  | -13.33993500 |
| N | 33.54246300 | -1.80000000 | -11.33271200 | C  | 28.91580300 | 4.43804300  | -13.61836500 |
| C | 33.30508200 | -0.40214900 | -11.03312000 | C  | 27.58080100 | 4.62719500  | -14.03156400 |
| H | 33.29968300 | -2.11257500 | -12.26127500 | H  | 31.15653500 | 7.34772900  | -11.76102700 |
| H | 33.54874300 | 0.19186500  | -11.91824900 | H  | 30.48940500 | 6.06351000  | -9.64713700  |
| H | 32.25335500 | -0.21789400 | -10.79022800 | H  | 29.88774100 | 7.56889500  | -8.97207500  |
| C | 30.70355500 | -3.79291200 | -14.83671600 | H  | 27.29388300 | 8.15912700  | -9.64379700  |
| C | 30.68020800 | -2.83303800 | -13.64824600 | H  | 25.68810000 | 7.36653200  | -11.41574400 |
| C | 29.34377700 | -2.70757500 | -12.93066700 | H  | 30.45394700 | 4.95106300  | -12.21547200 |
| O | 28.37943200 | -3.40822900 | -13.34981500 | H  | 25.69401200 | 5.61793000  | -13.65984200 |
| O | 29.32233600 | -1.91328600 | -11.94530600 | H  | 29.54808600 | 3.77380600  | -14.19401900 |
| H | 30.02359100 | -4.62793800 | -14.68447500 | H  | 27.23399600 | 4.10047800  | -14.91422500 |
| H | 31.38235500 | -3.15879000 | -12.87336000 | O  | 30.26305600 | 1.16735700  | -11.78590400 |
| H | 30.99974600 | -1.82049700 | -13.92178500 | H  | 30.57892400 | 1.92677600  | -12.31780000 |
| C | 27.87559500 | 1.06282800  | -17.13696600 | H  | 29.34660100 | 0.91672100  | -12.01288700 |
| C | 29.25141500 | 1.58654800  | -16.78227400 | N  | 16.96163200 | -3.31002900 | -12.61938300 |
| O | 29.41878200 | 2.68768200  | -16.25932500 | C  | 16.59819100 | -4.44990800 | -11.75881600 |
| C | 27.05442600 | 0.81195900  | -15.85437700 | C  | 15.33542600 | -3.94825900 | -11.03675000 |
| C | 25.62271700 | 0.45132700  | -16.15369600 | C  | 14.70292400 | -2.98279600 | -12.05072400 |
| C | 24.73341300 | 1.42744100  | -16.61392200 | C  | 15.91987900 | -2.27142300 | -12.64883800 |
| C | 25.14316700 | -0.84922400 | -15.96907800 | H  | 17.40982800 | -4.67060900 | -11.06125400 |
| C | 23.39971200 | 1.12132100  | -16.87358100 | H  | 14.67559500 | -4.76835000 | -10.74488600 |
| C | 23.81388300 | -1.17745600 | -16.22547500 | H  | 15.61629000 | -3.40311200 | -10.12885300 |
| C | 22.94615700 | -0.18203200 | -16.67129500 | H  | 14.17645100 | -3.54498400 | -12.82978600 |
| O | 21.62241000 | -0.53186400 | -16.87583300 | H  | 13.99310700 | -2.28573000 | -11.59929200 |
| H | 27.38074200 | 1.83632000  | -17.73299600 | H  | 15.77456100 | -1.91799600 | -13.67220300 |
| H | 27.52386900 | 0.01311100  | -15.26989400 | H  | 16.23381400 | -1.41093300 | -12.04504700 |
| H | 27.09516900 | 1.71303200  | -15.23692100 | C  | 29.55086100 | -2.94355300 | -1.16237800  |
| H | 25.07879000 | 2.44874900  | -16.75053900 | C  | 28.26604200 | -3.75061600 | -1.37865200  |
| H | 25.79725000 | -1.60961300 | -15.55372000 | C  | 28.09995700 | -4.31248100 | -2.79354400  |
| H | 22.71494300 | 1.89388900  | -17.21605000 | C  | 27.97311700 | -3.27813700 | -3.90344300  |
| H | 23.44252100 | -2.17692000 | -16.02407400 | O  | 28.14083800 | -2.07640800 | -3.76205400  |
| H | 21.13017100 | 0.25079400  | -17.15599400 | O  | 27.69905900 | -3.85473400 | -5.07379500  |
| N | 30.27420900 | 0.73671300  | -17.05441700 | H  | 29.54941100 | -2.10806100 | -1.86785300  |
| C | 31.68294000 | 1.10953600  | -16.97982200 | H  | 28.21954000 | -4.58766200 | -0.67097000  |
| C | 32.40058000 | 0.41950000  | -15.82052000 | H  | 27.40813100 | -3.10564200 | -1.15357900  |

|   |             |             |              |
|---|-------------|-------------|--------------|
| H | 28.95629000 | -4.94602700 | -3.06229200  |
| H | 27.22538900 | -4.97055200 | -2.85568200  |
| H | 30.46534700 | -3.51022800 | -1.36786600  |
| H | 29.56614100 | -2.49758300 | -0.16224600  |
| C | 34.86201600 | 7.99992900  | -10.31604800 |
| C | 35.23899200 | 6.50501800  | -10.33374200 |
| C | 35.10414000 | 5.89795400  | -11.69267200 |
| C | 34.18901500 | 5.02841400  | -12.23436700 |
| N | 35.94811900 | 6.21923100  | -12.74644300 |
| C | 35.52884600 | 5.54568600  | -13.85241100 |
| N | 34.46610900 | 4.81884400  | -13.57108200 |
| H | 35.56487100 | 8.59781400  | -10.90581500 |
| H | 36.25671600 | 6.36009500  | -9.94838600  |
| H | 34.57506100 | 5.95603200  | -9.65838300  |
| H | 36.73669900 | 6.84668900  | -12.69929100 |
| H | 33.35028500 | 4.53324000  | -11.76862100 |
| H | 36.02103700 | 5.61115400  | -14.81140900 |
| H | 33.70816500 | 3.64163800  | -14.36498600 |
| H | 34.87098200 | 8.38160300  | -9.28968400  |
| H | 33.87104000 | 8.09550800  | -10.77195900 |

### Int1-B<sub>Zn</sub> (1.0 kcal/mol)

|   |             |             |              |
|---|-------------|-------------|--------------|
| H | 20.66679000 | -6.80396300 | -16.56498800 |
| H | 16.38980100 | -5.37393300 | -12.30903600 |
| H | 24.65840100 | -6.75695400 | -19.16515500 |
| H | 29.36474700 | -8.34255400 | -18.17977300 |
| H | 35.11184600 | 4.87009700  | -6.01581500  |
| H | 32.10198600 | 7.76409600  | -10.35095700 |
| H | 33.92497800 | -0.02981600 | -10.21106700 |
| H | 31.95006600 | -4.27904600 | -6.58592000  |
| H | 23.18515900 | 1.49703000  | -4.32300200  |
| H | 22.41702400 | 4.62906400  | -7.60403000  |
| H | 22.25398000 | 6.38984100  | -15.14833700 |
| H | 33.53406300 | 5.46906600  | -6.68081600  |
| H | 30.78106800 | 8.84802700  | -10.93695600 |
| H | 23.93722900 | 6.31011500  | -15.82076100 |
| H | 23.80797600 | -0.12296500 | -3.81396100  |
| H | 32.79715300 | -3.33908200 | -5.29810200  |
| H | 32.07508000 | 0.82311700  | -17.96200200 |
| H | 30.43499800 | -3.27805100 | -15.73602700 |
| H | 31.70211100 | -4.16463700 | -14.93622900 |
| H | 30.41810000 | -9.06000500 | -14.20469600 |
| H | 20.88583700 | -5.05018800 | -16.84120000 |
| H | 34.15684600 | -4.71631800 | -10.10809500 |
| H | 23.72500000 | -8.30797800 | -7.05596000  |
| H | 21.59208200 | -3.72897200 | -7.32008700  |
| H | 27.89805300 | 0.15098800  | -17.74198000 |
| H | 27.15897800 | 4.34412300  | -6.69909500  |
| C | 29.55198900 | -8.45619000 | -13.91564500 |
| C | 29.09083800 | -7.65226200 | -15.11264800 |
| O | 28.92031100 | -6.42617800 | -15.10285500 |
| C | 29.80946700 | -7.58339200 | -12.69050400 |
| C | 28.49252900 | -7.14049000 | -12.03057900 |
| C | 28.77521900 | -6.05983600 | -10.99000300 |
| O | 29.46142000 | -6.36602300 | -10.00707300 |
| O | 28.32409500 | -4.87058000 | -11.22867200 |
| H | 28.76535500 | -9.19003800 | -13.68515000 |
| H | 30.41023000 | -8.11932600 | -11.95201200 |
| H | 30.38169400 | -6.70154500 | -12.99530300 |
| H | 27.79265400 | -6.78337900 | -12.78857700 |
| H | 28.04254900 | -8.00648100 | -11.53141000 |
| N | 28.92620300 | -8.37083100 | -16.23365200 |
| C | 28.69015700 | -7.77016700 | -17.53405800 |
| C | 27.22734200 | -7.97972700 | -17.92937700 |
| O | 26.76216600 | -9.11188900 | -17.99066000 |
| H | 28.97078600 | -9.37833400 | -16.19524600 |
| H | 29.00003400 | -6.72607600 | -17.48984900 |
| N | 26.51456100 | -6.84115900 | -18.12256300 |
| C | 25.05567100 | -6.84019200 | -18.14771900 |
| C | 24.51390100 | -5.69839200 | -17.28780000 |
| H | 26.96901200 | -5.96183700 | -17.92017800 |
| H | 24.73613500 | -7.81381700 | -17.76685000 |
| H | 23.42195000 | -5.69740600 | -17.30269600 |
| H | 24.84726600 | -5.78777100 | -16.24919000 |
| H | 24.84611200 | -4.72356400 | -17.66350700 |
| C | 23.25777000 | 6.03522600  | -15.04097500 |
| C | 23.15200600 | 4.49815800  | -15.03658900 |
| C | 22.23513200 | 3.92870400  | -13.97838500 |
| C | 22.38411900 | 4.27038000  | -12.62916100 |
| C | 21.27331100 | 2.95980000  | -14.29669800 |
| C | 21.62989600 | 3.65136600  | -11.63664500 |
| C | 20.51798200 | 2.31707800  | -13.31858700 |
| C | 20.70634600 | 2.65900400  | -11.97720200 |
| O | 19.97140800 | 1.99671200  | -11.03256900 |
| H | 23.65126600 | 6.41801000  | -14.09354800 |
| H | 22.79168600 | 4.17927800  | -16.02123900 |
| H | 24.14783200 | 4.04998500  | -14.93340400 |
| H | 23.12442100 | 5.00993400  | -12.33678600 |
| H | 21.14772300 | 2.66483400  | -15.33475800 |
| H | 21.77514200 | 3.91640900  | -10.59425600 |
| H | 19.83910300 | 1.51010300  | -13.56782200 |
| H | 20.33971800 | 2.20044100  | -10.16174200 |
| C | 20.86233400 | -5.83970300 | -16.08269700 |
| C | 19.77896700 | -5.55097200 | -15.04707900 |
| O | 18.79364500 | -6.26628200 | -14.90160800 |
| H | 21.84583200 | -5.85770500 | -15.60268300 |
| N | 19.99595000 | -4.42817900 | -14.28703500 |

|   |             |             |              |
|---|-------------|-------------|--------------|
| C | 19.19503200 | -4.19823800 | -13.09501000 |
| C | 18.13740700 | -3.11140700 | -13.26522200 |
| O | 18.36345000 | -2.05854800 | -13.88250900 |
| C | 20.15601300 | -3.85199800 | -11.93287700 |
| O | 19.50137200 | -3.68888000 | -10.67987700 |
| H | 20.90533600 | -3.97388300 | -14.34048200 |
| H | 18.69816600 | -5.14468800 | -12.87654300 |
| H | 20.84832800 | -4.69256600 | -11.82999300 |
| H | 20.75086800 | -2.97121600 | -12.18880100 |
| H | 19.20222400 | -2.77298100 | -10.61857500 |
| C | 23.90599400 | -7.35604100 | -7.56600000  |
| C | 22.90284600 | -6.30721700 | -7.11716300  |
| O | 21.74558600 | -6.62416300 | -6.83769600  |
| C | 23.65818500 | -7.70745500 | -9.05879200  |
| C | 24.05345000 | -6.64559800 | -10.02177500 |
| C | 25.24404000 | -6.42723600 | -10.66108100 |
| N | 23.24494600 | -5.58498000 | -10.40310800 |
| C | 23.94193400 | -4.77781100 | -11.23927700 |
| N | 25.16404200 | -5.27162200 | -11.41316600 |
| H | 24.94658600 | -7.06202200 | -7.41358900  |
| H | 24.22606300 | -8.60978100 | -9.30438600  |
| H | 22.59749400 | -7.95716800 | -9.17135600  |
| H | 22.30727000 | -5.40872900 | -10.06764200 |
| H | 26.14506000 | -7.01649500 | -10.61243100 |
| H | 23.53972500 | -3.90217600 | -11.72793900 |
| N | 23.30704000 | -5.00787200 | -7.14216300  |
| C | 22.40695900 | -3.96403900 | -6.62788900  |
| C | 23.33244200 | -2.76739400 | -6.39007300  |
| C | 24.46580800 | -2.97431100 | -7.40393500  |
| C | 24.67105100 | -4.49281600 | -7.38288300  |
| H | 21.92510900 | -4.32399500 | -5.71406600  |
| H | 22.81791300 | -1.81819200 | -6.52302700  |
| H | 23.73635800 | -2.79954700 | -5.37244600  |
| H | 24.15215800 | -2.64204800 | -8.39954800  |
| H | 25.37981500 | -2.43869800 | -7.14156500  |
| H | 25.08123500 | -4.87490400 | -8.31965400  |
| H | 25.35126200 | -4.77450400 | -6.56805600  |
| C | 23.17496900 | 4.07093500  | -8.16496700  |
| C | 24.47414800 | 3.92177700  | -7.39490700  |
| O | 24.50012200 | 3.75858700  | -6.17443900  |
| H | 22.78009000 | 3.07144200  | -8.36727900  |
| H | 23.31725600 | 4.57479800  | -9.12329800  |
| N | 25.61448100 | 3.94277700  | -8.14194600  |
| C | 26.90901600 | 3.66683200  | -7.52195100  |
| C | 27.90873700 | 3.87454900  | -8.66101200  |
| C | 27.12606900 | 3.45063900  | -9.89876100  |
| C | 25.70739200 | 3.96229500  | -9.61600900  |
| H | 26.93471600 | 2.64181300  | -7.12934200  |
| H | 28.16540400 | 4.93641500  | -8.73742800  |
| H | 28.83232300 | 3.31360900  | -8.51543600  |
| H | 27.53649500 | 3.86364000  | -10.81720700 |
| H | 27.11642400 | 2.36233100  | -9.98805500  |
| H | 25.58061700 | 4.98418000  | -9.99557300  |
| H | 24.94902900 | 3.32493300  | -10.07391500 |
| C | 23.37384700 | 0.46292100  | -4.62991700  |
| C | 24.33983800 | 0.45504100  | -5.82249900  |
| C | 23.73654800 | 0.58849400  | -7.20621900  |
| C | 22.36405700 | 0.51931100  | -7.47002000  |
| C | 24.60489300 | 0.72253200  | -8.30121000  |
| C | 21.87924300 | 0.53321400  | -8.78352400  |
| C | 24.12802500 | 0.76839100  | -9.60667800  |
| C | 22.75666900 | 0.65597600  | -9.85960600  |
| H | 22.41597400 | -0.01243600 | -4.85946700  |
| H | 25.06279600 | 1.26644100  | -5.69109100  |
| H | 24.92397600 | -0.47404200 | -5.81376100  |
| H | 21.65787100 | 0.43877700  | -6.65120700  |
| H | 25.67515800 | 0.78808000  | -8.12038700  |
| H | 20.81220700 | 0.42330200  | -8.96197200  |
| H | 24.81964700 | 0.87412900  | -10.42987800 |
| H | 22.39225800 | 0.66061800  | -10.87968900 |
| C | 32.20561100 | -3.27982800 | -6.21765600  |
| C | 30.91249700 | -2.46355800 | -6.01754700  |
| C | 29.96200900 | -2.57681700 | -7.18016000  |
| C | 30.11055500 | -3.34183200 | -8.31126400  |
| N | 28.70617200 | -1.96199700 | -7.20888900  |
| C | 28.13176500 | -2.37718500 | -8.34655900  |
| N | 28.94894800 | -3.19800400 | -9.03539200  |
| H | 32.81970500 | -2.83107000 | -6.99968400  |
| C | 30.39091100 | -2.79474400 | -5.11102800  |
| H | 31.16384200 | -1.40811200 | -5.83384600  |
| H | 27.83262000 | -2.69337400 | -5.74241500  |
| H | 30.92185200 | -3.97016900 | -8.63855900  |
| H | 27.15961500 | -2.08433200 | -8.71706500  |
| H | 28.72290600 | -3.69752100 | -9.90580200  |
| C | 33.48034500 | -4.18142800 | -10.78334400 |
| C | 33.37052200 | -2.73713600 | -10.31979000 |
| O | 33.13097300 | -2.39994200 | -9.16549100  |
| C | 32.15093500 | -4.95142000 | -10.76001500 |
| O | 31.99833200 | -5.56636000 | -9.50183500  |
| H | 33.91189100 | -4.22021700 | -11.78980000 |
| H | 31.31072000 | -4.27305200 | -10.97256300 |
| H | 32.16720300 | -5.70225600 | -11.56735000 |
| H | 31.09782100 | -5.95215500 | -9.50018100  |
| N | 33.56284800 | -1.80439900 | -11.29850800 |
| C | 33.30507100 | -0.40245600 | -11.03285700 |
| H | 33.60686000 | -2.10894200 | -12.25801700 |
| H | 33.55695200 | 0.17410700  | -11.92523600 |
| H | 32.25334800 | -0.22418200 | -10.79026700 |
| C | 30.70377800 | -3.79238000 | -14.83669500 |

|    |             |             |              |
|----|-------------|-------------|--------------|
| C  | 30.72765300 | -2.84696700 | -13.64109600 |
| C  | 29.46500000 | -2.05334900 | -13.38437700 |
| O  | 28.48136500 | -2.09506500 | -14.14463500 |
| O  | 29.55896900 | -1.33215800 | -12.31544400 |
| H  | 30.03351600 | -4.63465100 | -14.68865400 |
| H  | 30.95561300 | -3.38708300 | -12.71847100 |
| H  | 31.52899900 | -2.10387400 | -13.74929700 |
| C  | 27.87488600 | 1.06301600  | -17.13696800 |
| C  | 29.25495000 | 1.62743000  | -16.86787800 |
| O  | 29.42995100 | 2.79782100  | -16.53201000 |
| C  | 27.11927000 | 0.80074300  | -15.81579600 |
| C  | 25.66679400 | 0.48614600  | -16.06759600 |
| C  | 24.80896100 | 1.48483600  | -16.53988200 |
| C  | 25.13988000 | -0.78961900 | -15.84290400 |
| C  | 23.46099700 | 1.22851400  | -16.77384000 |
| C  | 23.79257100 | -1.06514300 | -16.07142300 |
| C  | 22.95732300 | -0.04764400 | -16.52756200 |
| O  | 21.61491900 | -0.34586500 | -16.69362000 |
| H  | 27.33781100 | 1.82124600  | -17.71409100 |
| H  | 27.59322500 | -0.01846200 | -15.26677500 |
| H  | 27.20029300 | 1.69325300  | -15.18834600 |
| H  | 25.19401400 | 2.48678400  | -16.70983300 |
| H  | 25.77495700 | -1.56670000 | -15.42988900 |
| H  | 22.80393000 | 2.01859900  | -17.12895500 |
| H  | 23.37487000 | -2.04077600 | -15.84993300 |
| H  | 21.15891900 | 0.43935800  | -17.02376000 |
| N  | 30.27516100 | 0.73635800  | -16.99958300 |
| C  | 31.68290800 | 1.10883700  | -16.98002900 |
| C  | 32.43810500 | 0.45014600  | -15.82590700 |
| C  | 31.99899100 | 1.03160100  | -14.48183000 |
| C  | 32.55797600 | 2.40966700  | -14.16675600 |
| O  | 33.71051900 | 2.66687900  | -14.76549700 |
| O  | 32.02177800 | 3.19040400  | -13.38437300 |
| H  | 30.04298600 | -0.20217600 | -17.28776100 |
| H  | 31.72081800 | 2.19736300  | -16.90115300 |
| H  | 32.24072700 | -0.62976700 | -15.83811300 |
| H  | 33.51378700 | 0.58691900  | -15.96414200 |
| H  | 30.91246500 | 1.07759300  | -14.40216100 |
| H  | 32.30923200 | 0.38606300  | -13.65302700 |
| C  | 25.98798900 | -1.79866800 | -12.25635000 |
| O  | 25.30534500 | -2.64688800 | -12.93930900 |
| O  | 26.90501700 | -2.23595700 | -11.48072500 |
| C  | 25.72483200 | -0.36428700 | -12.42379200 |
| C  | 26.72372400 | 0.62944000  | -12.22479600 |
| O  | 27.94220300 | 0.39232300  | -11.75978200 |
| C  | 26.38136100 | 1.95688200  | -12.56932000 |
| C  | 25.09974300 | 2.30187000  | -12.95824700 |
| C  | 24.10085800 | 1.32871300  | -13.08450500 |
| C  | 24.43928500 | 0.00967900  | -12.85373000 |
| H  | 28.71145200 | -0.71283100 | -12.11307300 |
| H  | 27.15551700 | 2.70969200  | -12.51696400 |
| H  | 24.88326500 | 3.34219300  | -13.16341300 |
| H  | 23.09782000 | 1.58535900  | -13.38525800 |
| H  | 23.69535500 | -0.76524600 | -12.97738800 |
| Zn | 26.72097200 | -4.16515800 | -12.24959400 |
| O  | 27.26429100 | -4.45380400 | -14.23298000 |
| H  | 27.72853000 | -3.60161600 | -14.43742700 |
| H  | 27.86455900 | -5.18101100 | -14.49515700 |
| O  | 22.64658100 | -3.09992200 | -13.73338800 |
| H  | 22.14214800 | -2.25453100 | -13.79820500 |
| H  | 23.59125600 | -2.86373600 | -13.64533800 |
| O  | 20.91629900 | -1.01677100 | -14.00651900 |
| H  | 21.05827100 | -0.75702200 | -14.93303600 |
| H  | 20.01188800 | -1.40247700 | -13.99199200 |
| C  | 34.22908200 | 4.62582600  | -6.61641100  |
| C  | 33.54321600 | 3.32957400  | -6.14838800  |
| C  | 32.25260400 | 2.99567400  | -6.92899000  |
| C  | 31.97050600 | 1.47787900  | -6.96717800  |
| N  | 30.62904500 | 1.09568400  | -7.42092300  |
| C  | 30.21946900 | 1.13110800  | -8.71288500  |
| N  | 30.91541600 | 1.79653800  | -9.62795000  |
| N  | 29.06672400 | 0.53575500  | -9.03545300  |
| H  | 34.59810400 | 4.47607900  | -7.64086200  |
| H  | 34.25806800 | 2.50359800  | -6.26129900  |
| H  | 33.31071200 | 3.38244500  | -5.07835700  |
| H  | 31.39125600 | 3.50901200  | -6.48826600  |
| H  | 32.34815100 | 3.39540900  | -7.94663200  |
| H  | 32.72847100 | 0.96715300  | -7.57707700  |
| H  | 32.06709000 | 1.07582500  | -5.95555300  |
| H  | 30.09925500 | 0.47512000  | -6.82173900  |
| H  | 31.74978600 | 2.28179000  | -9.35049600  |
| H  | 30.61803500 | 1.79582100  | -10.64933700 |
| H  | 28.71666200 | -0.17887100 | -8.40266200  |
| H  | 28.71238300 | 0.51641400  | -9.99965200  |
| C  | 31.09193500 | 7.81089100  | -10.77008800 |
| C  | 30.05441300 | 7.00606700  | -9.96898600  |
| C  | 28.78892700 | 6.79560600  | -10.75051500 |
| C  | 27.55420200 | 7.34227200  | -10.50524700 |
| C  | 28.65733200 | 6.01421000  | -11.96175700 |
| C  | 27.30919500 | 6.13864700  | -12.40072900 |
| C  | 29.54237300 | 5.21911400  | -12.71310200 |
| N  | 26.65877600 | 6.95000300  | -11.48974500 |
| C  | 26.83837800 | 5.50985100  | -13.55878500 |
| C  | 29.08110700 | 4.59660400  | -13.86755400 |
| C  | 27.74270400 | 4.74347800  | -14.28640800 |
| H  | 31.17941700 | 7.37099900  | -11.77068600 |
| H  | 30.48553800 | 6.02912800  | -9.70916400  |
| H  | 29.82932900 | 7.50455700  | -9.01912600  |
| H  | 27.23531600 | 7.98714500  | -9.69866500  |

|   |             |             |              |
|---|-------------|-------------|--------------|
| H | 25.69360300 | 7.22902100  | -11.54200700 |
| H | 30.57726500 | 5.09094700  | -12.41331100 |
| H | 25.80875100 | 5.62338800  | -13.88168600 |
| H | 29.75146000 | 4.00057400  | -14.47527300 |
| H | 27.43290900 | 4.24572900  | -15.19902400 |
| O | 30.14809100 | 1.68491400  | -12.11066100 |
| H | 30.32705700 | 2.46973100  | -12.65034600 |
| H | 29.20130000 | 1.38710400  | -12.15385800 |
| N | 16.94664500 | -3.33691600 | -12.67217200 |
| C | 16.59832500 | -4.44995800 | -11.75911100 |
| C | 15.33324000 | -3.92965300 | -11.06019400 |
| C | 14.67441700 | -3.04016200 | -12.12543100 |
| C | 15.86998400 | -2.34022700 | -12.77943000 |
| H | 17.41370200 | -4.63410500 | -11.06009600 |
| H | 14.69093800 | -4.74242200 | -10.71304400 |
| H | 15.61259400 | -3.32620700 | -10.18909300 |
| H | 14.15441800 | -3.66069300 | -12.86354700 |
| H | 13.95251400 | -2.33187300 | -11.71184700 |
| H | 15.71258600 | -2.07140600 | -13.82638100 |
| H | 16.15404400 | -1.42436500 | -12.24582500 |
| C | 29.55093400 | -2.94390800 | -1.16184000  |
| C | 28.26040300 | -3.72993800 | -1.41439100  |
| C | 28.06639900 | -4.14842100 | -2.87623900  |
| C | 27.89077600 | -2.99445000 | -3.85202200  |
| O | 27.95002700 | -1.81374000 | -3.56688200  |
| O | 27.68631900 | -3.44077600 | -5.10273200  |
| H | 29.56552600 | -2.09349500 | -1.85055400  |
| H | 28.22776700 | -4.63020600 | -0.78898500  |
| H | 27.40859400 | -3.10865400 | -1.11500100  |
| H | 28.92192400 | -4.73586600 | -3.23483800  |
| H | 27.19639200 | -4.80702600 | -2.98682300  |
| H | 30.46534500 | -3.51015300 | -1.36808700  |
| H | 29.56612900 | -2.49731000 | -0.16236800  |
| C | 34.86194100 | 7.99995600  | -10.31596100 |
| C | 35.25446700 | 6.50953400  | -10.32028700 |
| C | 35.25398700 | 5.89967700  | -11.68467600 |
| C | 34.38942700 | 5.04074100  | -12.31805200 |
| N | 36.22951300 | 6.17612800  | -12.63263700 |
| C | 35.93028000 | 5.48507400  | -13.76769400 |
| N | 34.82265500 | 4.79022500  | -13.60585400 |
| H | 35.56448400 | 8.59937100  | -10.90473700 |
| H | 36.23766100 | 6.37595100  | -9.84977400  |
| H | 34.54432900 | 5.94847500  | -9.70414900  |
| H | 37.02316300 | 6.78483100  | -12.50128400 |
| H | 33.48230100 | 4.58302600  | -11.95316000 |
| H | 36.53896900 | 5.51677300  | -14.65932200 |
| H | 34.09095700 | 3.54489200  | -14.41657300 |
| H | 34.87104400 | 8.38161900  | -9.28969100  |
| H | 33.87106200 | 8.09551200  | -10.77200300 |

# TS1-B<sub>Zn</sub> (42.4 kcal/mol)

|   |             |             |              |
|---|-------------|-------------|--------------|
| H | 20.66678000 | -6.80395300 | -16.56500300 |
| H | 16.38976100 | -5.37393200 | -12.30902300 |
| H | 24.65834500 | -6.75695400 | -19.16513300 |
| H | 29.36481200 | -8.34246200 | -18.17978700 |
| H | 35.11181100 | 4.87013700  | -6.01577800  |
| H | 32.10198100 | 7.76411300  | -10.35094300 |
| H | 33.92492900 | -0.02997800 | -10.21095700 |
| H | 31.94998600 | -4.27910700 | -6.58569900  |
| H | 23.18515500 | 1.49703000  | -4.32300100  |
| H | 22.41702100 | 4.62906900  | -7.60403900  |
| H | 22.25403700 | 6.38991000  | -15.14863400 |
| H | 33.53405200 | 5.46906100  | -6.68075300  |
| H | 30.78103100 | 8.84802300  | -10.93691400 |
| H | 23.93719000 | 6.31009800  | -15.82080100 |
| H | 23.80795000 | -0.12309000 | -3.81403900  |
| H | 32.79687200 | -3.33914200 | -5.29792600  |
| H | 32.07534300 | 0.82337600  | -17.96197300 |
| H | 30.43505500 | -3.27789800 | -15.73595700 |
| H | 31.70219000 | -4.16431700 | -14.93662900 |
| H | 30.41808600 | -9.06004200 | -14.20466100 |
| H | 20.88585300 | -5.05017500 | -16.84118500 |
| H | 34.15668300 | -4.71567600 | -10.10742400 |
| H | 23.72492900 | -8.30801200 | -7.05605000  |
| H | 21.59206100 | -3.72900200 | -7.32007200  |
| H | 27.89815800 | 0.15099200  | -17.74198300 |
| H | 27.15893400 | 4.34407200  | -6.69904000  |
| C | 29.55200400 | -8.45607600 | -13.91560300 |
| C | 29.07629500 | -7.64914700 | -15.10270100 |
| O | 28.85884900 | -6.42971200 | -15.08918100 |
| C | 29.83355000 | -7.62703800 | -12.66433600 |
| C | 28.56707000 | -7.36587100 | -11.84449000 |
| C | 28.87249800 | -6.44887600 | -10.65233600 |
| O | 29.82889800 | -6.76583600 | -9.92966700  |
| O | 28.12998100 | -5.41320700 | -10.48714800 |
| H | 28.76781000 | -9.19509500 | -13.69247400 |
| H | 30.55263900 | -8.13784700 | -12.02079000 |
| H | 30.28947600 | -6.67474800 | -12.95483800 |
| H | 27.77696400 | -6.95328300 | -12.47910600 |
| H | 28.19458700 | -8.32155900 | -11.45302700 |
| N | 28.94024500 | -8.36373600 | -16.23222600 |
| C | 28.68995800 | -7.77026100 | -17.53409100 |
| C | 27.22727100 | -7.98109500 | -17.92987100 |
| O | 26.76346400 | -9.11237000 | -18.00679400 |
| H | 29.02620500 | -9.36840600 | -16.19600300 |
| H | 28.99644200 | -6.72449500 | -17.49818300 |
| N | 26.51431300 | -6.84019600 | -18.11654000 |

|   |             |             |              |    |             |             |              |
|---|-------------|-------------|--------------|----|-------------|-------------|--------------|
| C | 25.05582400 | -6.84020300 | -18.14775100 | C  | 32.20612300 | -3.27973600 | -6.21831600  |
| C | 24.50441800 | -5.70197800 | -17.28849800 | C  | 30.91473400 | -2.46760200 | -5.99911500  |
| H | 26.96568000 | -5.96514400 | -17.89031600 | C  | 30.01021500 | -2.41182000 | -7.20437600  |
| H | 24.73489400 | -7.81452800 | -17.76932100 | C  | 30.32908100 | -2.25247200 | -8.53639000  |
| H | 23.41337600 | -5.68964600 | -17.33233300 | N  | 28.62811000 | -2.54358500 | -7.09561100  |
| H | 24.80245400 | -5.80487300 | -16.24085100 | C  | 28.14545000 | -2.48834000 | -8.33385900  |
| H | 24.85395300 | -4.72571900 | -17.64531400 | N  | 29.14021800 | -2.31187200 | -9.22860400  |
| C | 23.25773300 | 6.03513400  | -15.04056200 | H  | 32.82723300 | -2.83088300 | -6.99656900  |
| C | 23.31467400 | 4.49299900  | -14.98933000 | H  | 30.33832800 | -2.88488100 | -5.17001800  |
| C | 22.49214300 | 3.79285100  | -13.92959700 | H  | 31.17899400 | -1.44639700 | -5.68126900  |
| C | 22.31459000 | 4.31786700  | -12.64603400 | H  | 27.95684200 | -3.30336100 | -5.81709700  |
| C | 21.94179200 | 2.52955700  | -14.19675700 | H  | 31.28801900 | -2.14754100 | -9.01220200  |
| C | 21.59435200 | 3.62271000  | -11.67453800 | H  | 27.11377500 | -2.57279200 | -8.63366500  |
| C | 21.23597600 | 1.81066900  | -13.23689000 | H  | 28.94146700 | -2.09969900 | -10.20506600 |
| C | 21.04534100 | 2.37248200  | -11.97144100 | C  | 33.48012300 | -4.18222200 | -10.78403300 |
| O | 20.30692500 | 1.66532800  | -11.06094500 | C  | 33.52315000 | -2.73194000 | -10.33031400 |
| H | 23.65005600 | 6.46720300  | -14.11168200 | O  | 33.54321200 | -2.38388600 | -9.15242000  |
| H | 23.01665500 | 4.10196000  | -15.96960600 | C  | 32.08708400 | -4.81643400 | -10.66514600 |
| H | 24.36733300 | 4.19526700  | -14.87084500 | O  | 31.74265700 | -4.95555800 | -9.31690000  |
| H | 22.73737200 | 5.28509500  | -12.39054600 | H  | 33.84500800 | -4.28024600 | -11.81286700 |
| H | 22.09943100 | 2.08153400  | -15.17311800 | H  | 31.35954300 | -4.19133700 | -11.21256700 |
| H | 21.45552500 | 4.05325000  | -10.68606300 | H  | 32.11472800 | -5.78888800 | -11.18203800 |
| H | 20.85839100 | 0.81550500  | -13.45020700 | H  | 30.93878300 | -5.52048100 | -9.30049500  |
| H | 20.40917600 | 2.08120500  | -10.19477500 | N  | 33.53497500 | -1.80017200 | -11.32867100 |
| C | 20.86231300 | -5.83972700 | -16.08268900 | C  | 33.30512700 | -0.40207000 | -11.03299900 |
| C | 19.85649500 | -5.65417400 | -14.95417500 | H  | 33.39213000 | -2.10883600 | -12.27805400 |
| O | 19.22357400 | -6.60036600 | -14.49770300 | H  | 33.54937800 | 0.19191800  | -11.91672300 |
| H | 21.85861200 | -5.86304100 | -15.62639000 | H  | 32.25766800 | -0.20296600 | -10.78386600 |
| N | 19.75564900 | -4.38564000 | -14.43555400 | C  | 30.70379600 | -3.79293700 | -14.83604700 |
| C | 19.19509300 | -4.19824400 | -13.09497900 | C  | 30.51224500 | -2.85140600 | -13.62019800 |
| C | 18.17133300 | -3.07030700 | -13.14557600 | C  | 29.48674700 | -1.71835100 | -13.78230400 |
| O | 18.43947400 | -1.97458700 | -13.66832300 | O  | 28.24559100 | -2.06003100 | -14.04760500 |
| C | 20.36636900 | -3.93209200 | -12.11494900 | O  | 29.83713700 | -0.54725700 | -13.63791000 |
| O | 20.10415600 | -4.38155000 | -10.77846700 | H  | 30.05087300 | -4.66071300 | -14.77074100 |
| H | 20.40329600 | -3.66826800 | -14.74774000 | H  | 30.20633100 | -3.43541600 | -12.74493100 |
| H | 18.73903400 | -5.15289500 | -12.83599400 | H  | 31.44841500 | -2.35336000 | -13.35945900 |
| H | 21.21856600 | -4.50190900 | -12.48938800 | C  | 27.87482200 | 1.06301400  | -17.13686800 |
| H | 20.65046700 | -2.87470000 | -12.13269600 | C  | 29.25590300 | 1.59293100  | -16.79913000 |
| H | 19.88239900 | -3.62016400 | -10.22982400 | O  | 29.42937000 | 2.74711200  | -16.41110400 |
| C | 23.90612600 | -7.35589700 | -7.56598100  | C  | 27.00472100 | 0.82699200  | -15.89699900 |
| C | 22.95326300 | -6.30570800 | -7.02328500  | C  | 25.62004400 | 0.36518500  | -16.27765600 |
| O | 21.84393100 | -6.63776900 | -6.60003900  | C  | 24.70499600 | 1.25690500  | -16.84499900 |
| C | 23.40697100 | -7.74571400 | -8.99374700  | C  | 25.20536400 | -0.95477700 | -16.05860800 |
| C | 23.81289800 | -6.77850000 | -10.03537800 | C  | 23.40578900 | 0.85745000  | -17.15932300 |
| C | 25.05685600 | -6.62314200 | -10.57697400 | C  | 23.90818200 | -1.37084600 | -16.35120800 |
| N | 23.06622300 | -5.71403400 | -10.51716800 | C  | 23.00805900 | -0.45219300 | -16.89068400 |
| C | 23.86143400 | -4.95909500 | -11.31301200 | O  | 21.71035000 | -0.88261400 | -17.11447800 |
| N | 25.07805700 | -5.49259500 | -11.36155300 | H  | 27.40633100 | 1.83217300  | -17.76065400 |
| H | 24.96383900 | -7.09304600 | -7.56255500  | H  | 27.48678400 | 0.09247600  | -15.24934900 |
| H | 23.82932600 | -8.72155300 | -9.25315700  | H  | 26.95321200 | 1.75647900  | -15.32631300 |
| H | 22.32110500 | -7.86994200 | -8.94428400  | H  | 24.99838600 | 2.28871600  | -17.02002400 |
| H | 22.09014100 | -5.50673600 | -10.31888300 | H  | 25.89371500 | -1.65797300 | -15.59873100 |
| H | 25.94334600 | -7.21359300 | -10.40840400 | H  | 22.70179300 | 1.56747100  | -17.58909200 |
| H | 23.54038800 | -4.08830000 | -11.85970100 | H  | 23.57800500 | -2.37325800 | -16.09978600 |
| N | 23.30666600 | -4.99932700 | -7.15406800  | H  | 21.20390100 | -0.15812600 | -17.50510500 |
| C | 22.40698200 | -3.96402700 | -6.62790000  | N  | 30.28049300 | 0.71468200  | -16.97556700 |
| C | 23.33538900 | -2.77121700 | -6.39347500  | C  | 31.68252400 | 1.10849200  | -16.98007600 |
| C | 24.42274200 | -2.94473200 | -7.46298200  | C  | 32.49648700 | 0.47388600  | -15.85553600 |
| C | 24.64310800 | -4.46332900 | -7.48937200  | C  | 32.11495000 | 1.05869000  | -14.50248200 |
| H | 21.93121100 | -4.33207900 | -5.71534500  | C  | 32.75789900 | 2.36353500  | -14.10268000 |
| H | 22.81587300 | -1.81910400 | -6.47127300  | O  | 33.66486200 | 2.85127900  | -14.91746000 |
| H | 23.78289900 | -2.83817300 | -5.39588100  | O  | 32.44669300 | 2.90522500  | -13.03436600 |
| H | 24.06037100 | -2.58908500 | -8.43361500  | H  | 30.05220000 | -0.21553900 | -17.29116600 |
| H | 25.33982200 | -2.40165000 | -7.22766900  | H  | 31.70565600 | 2.19744000  | -16.90478700 |
| H | 24.98310600 | -4.82296100 | -8.46303300  | H  | 32.30912100 | -0.60664100 | -15.84296500 |
| H | 25.38396600 | -4.75716100 | -6.73455500  | H  | 33.56262100 | 0.61922000  | -16.05404000 |
| C | 23.17497500 | 4.07090800  | -8.16498400  | H  | 31.03342200 | 1.19878900  | -14.45351300 |
| C | 24.46734600 | 3.91388200  | -7.38439300  | H  | 32.32623500 | 0.35489800  | -13.69364100 |
| O | 24.48406600 | 3.73607000  | -6.16586100  | C  | 26.29915200 | -2.09230800 | -12.02624900 |
| H | 22.78058100 | 3.06936600  | -8.36652500  | O  | 25.40490700 | -2.78910400 | -12.58028300 |
| H | 23.31558000 | 4.57034700  | -9.12512100  | O  | 27.12277000 | -2.62199600 | -11.9633200  |
| N | 25.60697900 | 3.94039500  | -8.12795200  | C  | 26.51728800 | -0.69667400 | -12.49688900 |
| C | 26.90909600 | 3.66690900  | -7.52204400  | C  | 27.50837400 | 0.19233800  | -11.85973100 |
| C | 27.89642800 | 3.92991400  | -8.66415800  | O  | 28.39868800 | -0.19930600 | -11.05627900 |
| C | 27.10688000 | 3.52476100  | -9.90012100  | C  | 27.43911900 | 1.57709800  | -12.27753800 |
| C | 25.68842600 | 4.00936100  | -9.59931200  | C  | 26.31157200 | 2.09148400  | -12.85063700 |
| H | 26.95902100 | 2.63640500  | -7.15262600  | C  | 25.19996500 | 1.26591100  | -13.19860400 |
| H | 28.13250300 | 4.99852300  | -8.70802300  | C  | 25.32160000 | -0.07902000 | -13.05900900 |
| H | 28.83155200 | 3.37972200  | -8.55164100  | H  | 27.38872100 | -1.21324900 | -13.46250400 |
| H | 27.50019600 | 3.94268400  | -10.82393300 | H  | 28.28408200 | 2.20317100  | -12.02885000 |
| H | 27.10468300 | 2.43851900  | -9.98708500  | H  | 26.26486100 | 3.15781500  | -13.04575100 |
| H | 25.54352500 | 5.04075500  | -9.94820600  | H  | 24.29587200 | 1.70386400  | -13.60103400 |
| H | 24.93607000 | 3.37320000  | -10.07179800 | H  | 24.51565600 | -0.74264600 | -13.34300300 |
| C | 23.37387600 | 0.46306800  | -4.62985500  | Zn | 26.85414200 | -4.54718800 | -11.72761400 |
| C | 24.42068400 | 0.45184000  | -5.76670200  | O  | 27.53300800 | -4.59239400 | -13.65105700 |
| C | 23.95651100 | 0.53407000  | -7.20808800  | H  | 27.81687300 | -3.68691400 | -13.94158300 |
| C | 22.62032100 | 0.42964900  | -7.60747100  | H  | 28.06452900 | -5.28117700 | -14.10002400 |
| C | 24.93006400 | 0.63287500  | -8.21624000  | O  | 23.09175400 | -3.49867400 | -14.04441100 |
| C | 22.27334500 | 0.38351500  | -8.96226000  | H  | 22.47397700 | -2.74410000 | -14.06015800 |
| C | 24.59081700 | 0.61496200  | -9.56671100  | H  | 23.94005500 | -3.14773300 | -13.71612100 |
| C | 23.25329400 | 0.48133700  | -9.95046300  | O  | 21.02479400 | -1.62256000 | -14.44169400 |
| H | 22.42914600 | -0.01427600 | -4.90255900  | H  | 21.08275800 | -1.35508800 | -15.37488900 |
| H | 25.11671600 | 1.27914000  | -5.59447500  | H  | 20.06962800 | -1.64316200 | -14.19946200 |
| H | 25.01811000 | -0.46598900 | -5.68598400  | C  | 34.22913500 | 4.62577400  | -6.61650700  |
| H | 21.83740700 | 0.36688400  | -6.85865300  | C  | 33.55711900 | 3.36079000  | -6.05001100  |
| H | 25.97522800 | 0.71806700  | -7.93185700  | C  | 32.20742200 | 3.00856200  | -6.70049500  |
| H | 21.23494300 | 0.25683800  | -9.25070800  | C  | 31.85477400 | 1.52000900  | -6.50141500  |
| H | 25.36226700 | 0.69795900  | -10.32303400 | N  | 30.48944400 | 1.14777000  | -6.88328900  |
| H | 22.98865400 | 0.45626500  | -11.00158000 | C  | 30.06492400 | 1.04407400  | -8.16254100  |



|   |             |             |              |
|---|-------------|-------------|--------------|
| N | 30.83623500 | 1.46424600  | -9.15640500  |
| N | 28.82625300 | 0.59645900  | -8.42403900  |
| H | 34.57781800 | 4.43404500  | -7.63920800  |
| H | 34.25007600 | 2.51802000  | -6.17593600  |
| H | 33.41064800 | 3.46849200  | -4.96838600  |
| H | 31.40493800 | 3.62598400  | -6.28193800  |
| H | 32.24798200 | 3.25886800  | -7.76738100  |
| H | 32.57454700 | 0.88377200  | -7.03521900  |
| H | 31.95119500 | 1.26903200  | -5.44239000  |
| H | 29.92544100 | 0.67824000  | -6.18947600  |
| H | 31.75126000 | 1.82018200  | -8.94288700  |
| H | 30.57067600 | 1.43267700  | -10.17735000 |
| H | 28.42552400 | -0.05543900 | -7.75853800  |
| H | 28.62361100 | 0.37067700  | -9.41462600  |
| C | 31.09198400 | 7.81089200  | -10.77014300 |
| C | 30.04758500 | 7.01897300  | -9.96264400  |
| C | 28.80395500 | 6.80842100  | -10.77595200 |
| C | 27.58327500 | 7.41814200  | -10.63115100 |
| C | 28.72211700 | 6.00413100  | -11.97472900 |
| C | 27.42309400 | 6.19258100  | -12.52270300 |
| C | 29.61884300 | 5.13941800  | -12.62847400 |
| N | 26.74361600 | 7.04549100  | -11.67218600 |
| C | 27.02556500 | 5.58777200  | -13.72018700 |
| C | 29.22187900 | 4.52290200  | -13.80745200 |
| C | 27.94517900 | 4.75921800  | -14.35674800 |
| H | 31.17517300 | 7.36437400  | -11.76767300 |
| H | 30.47144100 | 6.04547200  | -9.68136700  |
| H | 29.80900100 | 7.53546800  | -9.02590500  |
| H | 27.24066200 | 8.10171900  | -9.86725700  |
| H | 25.80281800 | 7.37523900  | -11.80668600 |
| H | 30.60799100 | 4.94699300  | -12.22430400 |
| H | 26.03915200 | 5.76384700  | -14.13897300 |
| H | 29.89179000 | 3.85556800  | -14.33483600 |
| H | 27.69659700 | 4.27032700  | -15.29224100 |
| O | 30.49151800 | 1.56358000  | -11.74148800 |
| H | 31.17370900 | 2.05073200  | -12.25248200 |
| N | 30.18089300 | 0.79681100  | -12.25307600 |
| N | 16.95398100 | -3.31717400 | -12.63003300 |
| C | 16.59837600 | -4.44994300 | -11.75916800 |
| C | 15.33634400 | -3.94670000 | -11.03814500 |
| C | 14.69165500 | -3.00333200 | -12.06545500 |
| C | 15.89933100 | -2.29241600 | -12.68373800 |
| H | 17.41271500 | -4.66657500 | -11.06356700 |
| H | 14.68425000 | -4.76676200 | -10.72931700 |
| H | 15.61825500 | -3.38444300 | -10.14105300 |
| H | 14.16493100 | -3.58321300 | -12.83123700 |
| H | 13.97887500 | -2.30412000 | -11.62221700 |
| H | 15.74802200 | -1.96661800 | -13.71528900 |
| H | 16.20465000 | -1.41352800 | -12.10275500 |
| C | 29.55095300 | -2.94390300 | -1.16221100  |
| C | 28.27147600 | -3.76582400 | -1.35715600  |
| C | 28.10789000 | -4.36200000 | -2.75708600  |
| C | 27.96882200 | -3.35009000 | -3.88608500  |
| O | 28.08320600 | -2.14050800 | -3.75376400  |
| O | 27.74668200 | -3.95168800 | -5.05283700  |
| H | 29.53774400 | -2.11382100 | -1.87353900  |
| H | 28.23461700 | -4.58548100 | -0.62870200  |
| H | 27.40908500 | -3.12232300 | -1.14586800  |
| H | 28.96799400 | -4.99501700 | -3.01373200  |
| H | 27.23746200 | -5.02738200 | -2.80281800  |
| H | 30.46540300 | -3.51016500 | -1.36779600  |
| H | 29.56609300 | -2.49734300 | -0.16235200  |
| C | 34.86174200 | 7.99992000  | -10.31581100 |
| C | 35.30195200 | 6.52621400  | -10.34978300 |
| C | 35.29472500 | 5.95089700  | -11.72832300 |
| C | 34.47842900 | 5.02820100  | -12.33034500 |
| N | 36.17529800 | 6.34641300  | -12.72652000 |
| C | 35.86851400 | 5.65999300  | -13.86223500 |
| N | 34.84592800 | 4.85511000  | -13.65146000 |
| H | 35.54906600 | 8.62515500  | -10.89772000 |
| H | 36.29690500 | 6.42063900  | -9.89709000  |
| H | 34.62211200 | 5.92519300  | -9.73742300  |
| H | 36.91362400 | 7.02669800  | -12.62824600 |
| H | 33.65208600 | 4.46805300  | -11.92262700 |
| H | 36.40850200 | 5.77662800  | -14.79024300 |
| H | 34.09845400 | 3.68296700  | -14.49595100 |
| H | 34.87119600 | 8.38167400  | -9.28971400  |
| H | 33.87110600 | 8.09550700  | -10.77210100 |

### Int2-B<sub>Zn</sub> (29.7 kcal/mol)

|   |             |             |              |
|---|-------------|-------------|--------------|
| H | 20.66677600 | -6.80395200 | -16.56500400 |
| H | 16.38975100 | -5.37392700 | -12.30902800 |
| H | 24.65831500 | -6.75658100 | -19.16509100 |
| H | 29.36446700 | -8.34323800 | -18.17945600 |
| H | 35.11183500 | 4.87009300  | -6.01579700  |
| H | 32.10197500 | 7.76416100  | -10.35092100 |
| H | 33.92491900 | -0.02997500 | -10.21095100 |
| H | 31.94997700 | -4.27910200 | -6.58570600  |
| H | 23.18515800 | 1.49703000  | -4.32300000  |
| H | 22.41701500 | 4.62905900  | -7.60404000  |
| H | 22.25403700 | 6.38990600  | -15.14864600 |
| H | 33.53409100 | 5.46909900  | -6.68068900  |
| H | 30.78102700 | 8.84802400  | -10.93690400 |
| H | 23.93718900 | 6.31010000  | -15.82080100 |
| H | 23.80794500 | -0.12309300 | -3.81403800  |
| H | 32.79680700 | -3.33921600 | -5.29789000  |
| H | 32.07539700 | 0.82339900  | -17.96195800 |

|   |             |             |              |
|---|-------------|-------------|--------------|
| H | 30.43501900 | -3.27791300 | -15.73595500 |
| H | 31.70219900 | -4.16429100 | -14.93663900 |
| H | 30.41816900 | -9.05998700 | -14.20452500 |
| H | 20.88585800 | -5.05017100 | -16.84118100 |
| H | 34.15667700 | -4.71567200 | -10.10741500 |
| H | 23.72494500 | -8.30801800 | -7.05605600  |
| H | 21.59204400 | -3.72901500 | -7.32005700  |
| H | 27.89817300 | 0.15100500  | -17.74200000 |
| H | 27.15894300 | 4.34404800  | -6.69902300  |
| C | 29.55185300 | -8.45602900 | -13.91564500 |
| C | 29.08510200 | -7.65821700 | -15.11124300 |
| O | 28.90912900 | -6.43439400 | -15.10490600 |
| C | 29.84038000 | -7.60049900 | -12.68547800 |
| C | 28.56162600 | -7.25415500 | -11.91083700 |
| C | 28.89351500 | -6.22220500 | -10.82787700 |
| O | 29.65707400 | -6.58318900 | -9.92065600  |
| O | 28.41585400 | -5.03537000 | -10.96848000 |
| H | 28.76819900 | -9.19116300 | -13.67900700 |
| H | 30.52080300 | -8.12130500 | -12.00790900 |
| H | 30.33956800 | -6.67839600 | -12.99961000 |
| H | 27.79653600 | -6.88562900 | -12.60112800 |
| H | 28.17754300 | -8.16563000 | -11.43765000 |
| N | 28.91990000 | -8.37673500 | -16.23415100 |
| C | 28.69030700 | -7.77010100 | -17.53431200 |
| C | 27.22995700 | -7.97574200 | -17.94146900 |
| O | 26.76661500 | -9.10705000 | -18.02944800 |
| H | 28.97987900 | -9.38339700 | -16.19982500 |
| H | 29.00188000 | -6.72695000 | -17.48499700 |
| N | 26.51463800 | -6.83530600 | -18.11777300 |
| C | 25.05563300 | -6.84057800 | -18.14778400 |
| C | 24.50824900 | -5.70145500 | -17.28700100 |
| H | 26.96363900 | -5.96020400 | -17.88582800 |
| H | 24.73758400 | -7.81553100 | -17.76898400 |
| H | 23.41625100 | -5.70344900 | -17.30555300 |
| H | 24.83904200 | -5.79239000 | -16.24755800 |
| H | 24.83935200 | -4.72494700 | -17.65970800 |
| C | 23.25773500 | 6.03513100  | -15.04054900 |
| C | 23.26779400 | 4.49493700  | -14.97900800 |
| C | 22.40362900 | 3.86240400  | -13.91135400 |
| C | 22.37226500 | 4.34795700  | -12.59949100 |
| C | 21.67597800 | 2.69574200  | -14.18904500 |
| C | 21.63129700 | 3.70500800  | -11.60914600 |
| C | 20.94908900 | 2.02404300  | -13.21040000 |
| C | 20.91693400 | 2.54278900  | -11.91362200 |
| O | 20.17296000 | 1.87879500  | -10.97550600 |
| H | 23.64977800 | 6.46275700  | -14.10971700 |
| H | 22.95682400 | 4.10350700  | -15.95472500 |
| H | 24.30571500 | 4.15468700  | -14.84926300 |
| H | 22.93683000 | 5.23761700  | -12.33526700 |
| H | 21.71730300 | 2.27341600  | -15.18840400 |
| H | 21.60915000 | 4.10291100  | -10.59862700 |
| H | 20.45522300 | 1.08452800  | -13.43485500 |
| H | 20.39661000 | 2.22894500  | -10.10287700 |
| C | 20.86230600 | -5.83972700 | -16.08268300 |
| C | 19.77541400 | -5.54232300 | -15.05373200 |
| O | 18.76564700 | -6.22740500 | -14.93342700 |
| H | 21.84517100 | -5.85769800 | -15.60180600 |
| N | 20.01470300 | -4.44029000 | -14.27074200 |
| C | 19.19511300 | -4.19826500 | -13.09497900 |
| C | 18.12152300 | -3.13302500 | -13.30069300 |
| O | 18.32912900 | -2.10163500 | -13.96019200 |
| C | 20.13621900 | -3.80140700 | -11.93168600 |
| O | 19.46067100 | -3.58843800 | -10.69887500 |
| H | 20.93467500 | -4.00643500 | -14.30569200 |
| H | 18.70979600 | -5.14610000 | -12.85658100 |
| H | 20.83072300 | -4.63277000 | -11.78048400 |
| H | 20.73274300 | -2.93023200 | -12.21695700 |
| H | 19.12292200 | -2.68389100 | -10.69804800 |
| C | 23.90608500 | -7.35590100 | -7.56594900  |
| C | 22.90318700 | -6.30567800 | -7.12236400  |
| O | 21.74306800 | -6.62010300 | -6.85115900  |
| C | 23.63849000 | -7.73783100 | -9.04779000  |
| C | 24.06405300 | -6.70361000 | -10.02097900 |
| C | 25.27444700 | -6.51115700 | -10.62753100 |
| N | 23.29246200 | -5.61929100 | -10.40772800 |
| C | 24.03041700 | -4.82016600 | -11.21555200 |
| N | 25.24256300 | -5.34421700 | -11.36422700 |
| H | 24.94869100 | -7.06426600 | -7.42781700  |
| H | 24.18258600 | -8.65924800 | -9.27514500  |
| H | 22.57110200 | -7.96210400 | -9.14854100  |
| H | 22.35355600 | -5.42251000 | -10.08903800 |
| H | 26.16089100 | -7.12104200 | -10.56183500 |
| H | 23.66691000 | -3.92228800 | -11.68954900 |
| N | 23.30860900 | -5.00660100 | -7.14296200  |
| C | 22.40702600 | -3.96402300 | -6.62793500  |
| C | 23.33484200 | -2.77212500 | -6.37664100  |
| C | 24.47733500 | -2.97610300 | -7.38142000  |
| C | 24.67673300 | -4.49612100 | -7.37012300  |
| H | 21.92273600 | -4.32842700 | -5.71698400  |
| H | 22.82525200 | -1.82034700 | -6.50737000  |
| H | 23.72976200 | -2.81280400 | -5.35586500  |
| H | 24.17314700 | -2.63415900 | -8.37685100  |
| H | 25.38902400 | -2.44314600 | -7.10333200  |
| H | 25.09028300 | -4.87322000 | -8.30790300  |
| H | 25.35077100 | -4.78770900 | -6.55387200  |
| C | 23.17497100 | 4.07091100  | -8.16498700  |
| C | 24.46748900 | 3.90885300  | -7.38614400  |
| O | 24.48612300 | 3.72252500  | -6.16897100  |
| H | 22.77794600 | 3.07249000  | -8.37313700  |

|   |             |             |              |    |             |             |              |
|---|-------------|-------------|--------------|----|-------------|-------------|--------------|
| H | 23.32089000 | 4.57652100  | -9.12082600  | O  | 27.14956400 | -2.44103900 | -11.55869400 |
| N | 25.60814100 | 3.94084000  | -8.12947800  | C  | 26.23152200 | -0.47828000 | -12.59889800 |
| C | 26.90908600 | 3.66694500  | -7.52205300  | C  | 27.13096100 | 0.45165000  | -11.81681200 |
| C | 27.90094600 | 3.94467400  | -8.65620400  | O  | 27.74017900 | 0.14262200  | -10.79603500 |
| C | 27.11929700 | 3.55934200  | -9.90268900  | C  | 27.15929200 | 1.80365300  | -12.38908200 |
| C | 25.69497500 | 4.02852300  | -9.59930600  | C  | 26.00946000 | 2.29561000  | -12.91181500 |
| H | 26.96242100 | 2.63469900  | -7.15845700  | C  | 24.82156400 | 1.47653900  | -13.08449400 |
| H | 28.13895100 | 5.01348600  | -8.68260200  | C  | 24.91006500 | 0.14371100  | -12.94420400 |
| H | 28.83604400 | 3.39275900  | -8.54879600  | H  | 26.80011700 | -0.53968600 | -13.55011200 |
| H | 27.51392800 | 4.00431200  | -10.81255300 | H  | 28.04753500 | 2.40131200  | -12.24013400 |
| H | 27.13201800 | 2.47544100  | -10.01220600 | H  | 25.96994500 | 3.34057700  | -13.19990500 |
| H | 25.54349600 | 5.06304200  | -9.93608300  | H  | 23.89002600 | 1.94266000  | -13.37075900 |
| H | 24.94778500 | 3.39408700  | -10.08226000 | H  | 24.07596600 | -0.51866600 | -13.13624200 |
| C | 23.37388000 | 0.46306900  | -4.62985500  | Zn | 26.92098100 | -4.38033700 | -12.10134800 |
| C | 24.38106000 | 0.45107100  | -5.79372800  | O  | 27.30663800 | -4.53566000 | -14.08107600 |
| C | 23.84553500 | 0.55686100  | -7.20721200  | H  | 27.74362400 | -3.65400800 | -14.37205000 |
| C | 22.48832600 | 0.47212900  | -7.53698100  | H  | 27.87825500 | -5.26103000 | -14.40180700 |
| C | 24.76610900 | 0.66894100  | -8.26090700  | O  | 22.67615200 | -3.11024500 | -13.72735200 |
| C | 22.06769200 | 0.45813300  | -8.87132800  | H  | 22.16688800 | -2.27707700 | -13.84584100 |
| C | 24.35110200 | 0.68362800  | -9.58852000  | H  | 23.60930900 | -2.86344600 | -13.59416300 |
| C | 22.99549000 | 0.56826000  | -9.90674700  | O  | 20.87381000 | -1.13413100 | -14.26888500 |
| H | 22.42264400 | -0.01373700 | -4.88075200  | H  | 21.04926400 | -1.09869000 | -15.22503400 |
| H | 25.09090900 | 1.27081600  | -5.64357800  | H  | 19.96537800 | -1.50664500 | -14.18904600 |
| H | 24.97087900 | -0.47374100 | -5.74773300  | C  | 34.22905300 | 4.62580900  | -6.61655300  |
| H | 21.74481900 | 0.40117300  | -6.75048900  | C  | 33.56290800 | 3.35246600  | -6.06829500  |
| H | 25.82613500 | 0.74090500  | -8.03292200  | C  | 32.23405500 | 2.98559700  | -6.75012900  |
| H | 21.01333600 | 0.34362400  | -9.10384800  | C  | 31.87135500 | 1.50347300  | -6.52128400  |
| H | 25.08179600 | 0.78005100  | -10.37816900 | N  | 30.47994700 | 1.15184500  | -6.80887400  |
| H | 22.67637100 | 0.56489600  | -10.94242900 | C  | 29.95933600 | 1.01305000  | -8.04556700  |
| C | 32.20625200 | -3.27968100 | -6.21835600  | N  | 30.63695000 | 1.40945200  | -9.11347200  |
| C | 30.90970500 | -2.46094300 | -6.03481800  | N  | 28.70645200 | 0.54280600  | -8.17684200  |
| C | 30.01224400 | -2.42896100 | -7.25188600  | H  | 34.58295100 | 4.44292800  | -7.63946800  |
| C | 30.34021700 | -2.31644600 | -8.58611400  | H  | 34.26879100 | 2.51874800  | -6.18134800  |
| N | 28.62439600 | -2.53284600 | -7.14908400  | H  | 33.38819700 | 3.45404300  | -4.99008100  |
| C | 28.14928600 | -2.50834000 | -8.39185000  | H  | 31.42250500 | 3.61751300  | -6.37220800  |
| N | 29.15184300 | -2.36685400 | -9.28396900  | H  | 32.31135500 | 3.20429900  | -7.82312200  |
| H | 32.83642000 | -2.84036300 | -6.99550200  | H  | 32.53796700 | 0.85153100  | -7.10082400  |
| H | 30.32242700 | -2.85813700 | -5.20367700  | H  | 32.03375600 | 1.25373200  | -5.46989400  |
| H | 31.16721500 | -1.43220300 | -5.73942800  | H  | 29.90439200 | 0.83202100  | -6.04396700  |
| H | 27.93844700 | -3.27329000 | -5.83607200  | H  | 31.53153500 | 1.85036600  | -8.98398400  |
| H | 31.30345500 | -2.25087300 | -9.05868000  | H  | 30.34200400 | 1.23359600  | -10.11547800 |
| H | 27.11576700 | -2.58053000 | -8.69126100  | H  | 28.41199700 | -0.17404100 | -7.52102300  |
| H | 28.98726200 | -2.32290100 | -10.28405200 | H  | 28.36779100 | 0.41159000  | -9.13443800  |
| C | 33.48013200 | -4.18222400 | -10.78403400 | C  | 31.09199100 | 7.81087800  | -10.77016300 |
| C | 33.52693200 | -2.73286600 | -10.32692300 | C  | 30.04388300 | 7.00316500  | -9.98419600  |
| O | 33.57098400 | -2.38781500 | -9.14799600  | C  | 28.81542200 | 6.78600300  | -10.81977900 |
| C | 32.08794900 | -4.81573000 | -10.67893700 | C  | 27.59135000 | 7.39276400  | -10.69184500 |
| O | 31.72823700 | -4.94627500 | -9.33270200  | C  | 28.75333900 | 5.98505400  | -12.02319000 |
| H | 33.85019700 | -4.27663300 | -11.81121200 | C  | 27.46200700 | 6.17464400  | -12.58983500 |
| H | 31.36604500 | -4.19796200 | -11.23929000 | C  | 29.65873500 | 5.12180300  | -12.66849700 |
| H | 32.12457200 | -5.79195200 | -11.19029100 | N  | 26.76759600 | 7.02127900  | -11.74554900 |
| H | 30.87879800 | -5.44113050 | -9.32805900  | C  | 27.08161200 | 5.57556600  | -13.79573400 |
| N | 33.51988800 | -1.80293100 | -11.32537500 | C  | 29.27704500 | 4.50983500  | -13.85582500 |
| C | 33.30513200 | -0.40208000 | -11.03300500 | C  | 28.00803400 | 4.74765600  | -14.42272800 |
| H | 33.33252600 | -2.11562700 | -12.26632500 | H  | 31.18505000 | 7.37264500  | -11.77101500 |
| H | 33.56040100 | 0.18745600  | -11.91665300 | H  | 30.47397500 | 6.03238700  | -9.70303700  |
| H | 32.25711800 | -0.18786100 | -10.79616300 | H  | 29.78384600 | 7.50979200  | -9.04780700  |
| C | 30.70382300 | -3.79296800 | -14.83601700 | H  | 27.23672300 | 8.07413200  | -9.93146000  |
| C | 30.47581500 | -2.81277000 | -13.66588800 | H  | 25.83280500 | 7.35971400  | -11.89969400 |
| C | 29.29963100 | -1.83942300 | -13.90451100 | H  | 30.64272400 | 4.92684700  | -12.25266500 |
| O | 28.30189300 | -2.26276800 | -14.57786100 | H  | 26.10199900 | 5.75705600  | -14.22893600 |
| O | 29.37673400 | -0.67546000 | -13.44140500 | H  | 29.95463400 | 3.84643800  | -14.37939700 |
| H | 30.04647700 | -4.65539200 | -14.75799400 | H  | 27.77500900 | 4.26409500  | -15.36493700 |
| H | 30.25640800 | -3.35926400 | -12.73981800 | O  | 30.26696200 | 1.16479400  | -11.68339300 |
| H | 31.36079900 | -2.20076100 | -13.46240600 | H  | 30.93567300 | 1.69748500  | -12.16073400 |
| C | 27.87479300 | 1.06301800  | -17.13686000 | H  | 29.99537300 | 0.40965100  | -12.25357000 |
| C | 29.25535300 | 1.63092000  | -16.87354900 | N  | 16.94166600 | -3.34429800 | -12.68287700 |
| O | 29.43168700 | 2.81232300  | -16.57595200 | C  | 16.59839500 | -4.44993100 | -11.75917300 |
| C | 27.10359100 | 0.78077600  | -15.83961900 | C  | 15.33248100 | -3.92699500 | -11.06527700 |
| C | 25.69697000 | 0.32615200  | -16.13963400 | C  | 14.66410600 | -3.06227000 | -12.14497900 |
| C | 24.75821400 | 1.23558400  | -16.63764700 | C  | 15.85174800 | -2.36505500 | -12.81705500 |
| C | 25.29783000 | -1.00184900 | -15.94071200 | H  | 17.41472600 | -4.62730700 | -11.06005000 |
| C | 23.45487700 | 0.84077000  | -16.93031100 | H  | 14.69729900 | -4.73810800 | -10.70163100 |
| C | 23.99199900 | -1.41028700 | -16.21298600 | H  | 15.61069700 | -3.30618100 | -10.20605700 |
| C | 23.07656100 | -0.48372700 | -16.71106000 | H  | 14.14639900 | -3.70067600 | -12.86927900 |
| O | 21.78501900 | -0.92162500 | -16.95425700 | H  | 13.93793700 | -2.35189300 | -11.74262600 |
| H | 27.34086800 | 1.81871400  | -17.72174600 | H  | 15.69155400 | -2.12616000 | -13.87079200 |
| H | 27.64303100 | 0.02226000  | -15.26793200 | H  | 16.12405900 | -1.43186100 | -12.30807600 |
| H | 27.09075800 | 1.69245500  | -15.23752500 | C  | 29.55096600 | -2.94384800 | -1.16230100  |
| H | 25.04386900 | 2.27355900  | -16.78725100 | C  | 28.26825400 | -3.75574100 | -1.37411400  |
| H | 26.01130300 | -1.71386400 | -15.53624100 | C  | 28.10963000 | -4.33742800 | -2.78174000  |
| H | 22.73578400 | 1.55914800  | -17.31875200 | C  | 27.98237600 | -3.31944800 | -3.90631100  |
| H | 23.66285800 | -2.42255800 | -16.00601600 | O  | 28.13406600 | -2.11406100 | -3.77908600  |
| H | 21.28777800 | -0.20628200 | -17.37293600 | O  | 27.72632000 | -3.91428300 | -5.07222200  |
| N | 30.27438600 | 0.73905600  | -16.99097400 | H  | 29.54712100 | -2.11001600 | -1.86977900  |
| C | 31.68244400 | 1.10844000  | -16.98009400 | H  | 28.22085200 | -4.58360200 | -0.65577900  |
| C | 32.45335100 | 0.39479000  | -15.86897200 | H  | 27.40797300 | -3.10991700 | -1.16106700  |
| C | 32.00913300 | 0.84024200  | -14.47955700 | H  | 28.96906200 | -4.97159700 | -3.03859500  |
| C | 32.54860500 | 2.17128700  | -14.00271000 | H  | 27.23746100 | -4.99943700 | -2.83776600  |
| O | 33.38399200 | 2.77010500  | -14.82079100 | H  | 30.46540400 | -3.51018000 | -1.36774800  |
| O | 32.24055300 | 2.62878200  | -12.89559500 | H  | 29.56608400 | -2.49738200 | -0.16233500  |
| H | 30.03835500 | -0.21696900 | -17.21204900 | C  | 34.86170800 | 7.99988900  | -10.31565100 |
| H | 31.73279200 | 2.19224400  | -16.87166300 | C  | 35.25691100 | 6.51066100  | -10.34404700 |
| H | 32.28781100 | -0.68630600 | -15.96142200 | C  | 35.12698300 | 5.91060400  | -11.70686700 |
| H | 33.52482400 | 0.56965200  | -16.00368400 | C  | 34.28127400 | 4.96063600  | -12.22459200 |
| H | 30.91681300 | 0.86319800  | -14.41668300 | N  | 35.89634800 | 6.32140600  | -12.78700200 |
| H | 32.30562100 | 0.10722100  | -13.72266700 | C  | 35.50100800 | 5.62096900  | -13.88528800 |
| C | 26.18597400 | -1.93672500 | -12.22989000 | N  | 34.52602400 | 4.79103000  | -13.57359300 |
| O | 25.28162100 | -2.65183900 | -12.73175300 | H  | 35.55937500 | 8.60826700  | -10.90188000 |

|   |             |            |              |
|---|-------------|------------|--------------|
| H | 36.27766600 | 6.37916100 | -9.96112100  |
| H | 34.60256700 | 5.94639700 | -9.67204100  |
| H | 36.61948900 | 7.02425700 | -12.76271200 |
| H | 33.51525800 | 4.37720200 | -11.73689500 |
| H | 35.94438000 | 5.74611600 | -14.86204200 |
| H | 33.77767100 | 3.61001000 | -14.37718100 |
| H | 34.87118800 | 8.38172000 | -9.28973100  |
| H | 33.87116600 | 8.09546100 | -10.77224200 |

The enzyme-substrate complex with  
**Mode-B** for the Mn-enzyme of SDC.

# **E:S-B<sub>Mn</sub> (4.2 kcal/mol)**

|   |             |             |              |
|---|-------------|-------------|--------------|
| H | 20.66706400 | -6.80406200 | -16.56490400 |
| H | 16.38996100 | -5.37400500 | -12.30897400 |
| H | 24.65804400 | -6.75725100 | -19.16503800 |
| H | 29.36460100 | -8.34237500 | -18.18008600 |
| H | 35.11199200 | 4.87000600  | -6.01599100  |
| H | 32.10199900 | 7.76401000  | -10.35099500 |
| H | 33.92510800 | -0.02999900 | -10.21108200 |
| H | 31.95000600 | -4.27896400 | -6.58609900  |
| H | 23.18522000 | 1.49712900  | -4.32330000  |
| H | 22.41701400 | 4.62902500  | -7.60400800  |
| H | 22.25386800 | 6.38955300  | -15.14826800 |
| H | 33.53399900 | 5.46899900  | -6.68100000  |
| H | 30.78100300 | 8.84800100  | -10.93699200 |
| H | 23.93862500 | 6.30926700  | -15.81983300 |
| H | 23.80779800 | -0.12317000 | -3.81401300  |
| H | 32.79715300 | -3.33877400 | -5.29808300  |
| H | 32.07507900 | 0.82309800  | -17.96199500 |
| H | 30.43482300 | -3.27774000 | -15.73579800 |
| H | 31.70201100 | -4.16491900 | -14.93618100 |
| H | 30.41799100 | -9.06001500 | -14.20499400 |
| H | 20.88596700 | -5.05007300 | -16.84107800 |
| H | 34.15716400 | -4.71604900 | -10.10820400 |
| H | 23.72467700 | -8.30785000 | -7.05583500  |
| H | 21.59201500 | -3.72881300 | -7.31995300  |
| H | 27.89809600 | 0.15097700  | -17.74196100 |
| H | 27.15896200 | 4.34410800  | -6.69907700  |
| C | 29.55217800 | -8.45638400 | -13.91548900 |
| C | 29.09673800 | -7.66329600 | -15.11722600 |
| O | 28.96487400 | -6.43216800 | -15.11454000 |
| C | 29.83765200 | -7.57552300 | -12.69963200 |
| C | 28.54643300 | -7.14608800 | -11.98376200 |
| C | 28.86162500 | -6.01684400 | -10.99596400 |
| O | 29.48248200 | -6.31247100 | -9.96525100  |
| O | 28.51939200 | -4.82640600 | -11.35418100 |
| H | 28.76631600 | -9.18627400 | -13.67165500 |
| H | 30.47521700 | -8.10495600 | -11.98708400 |
| H | 30.38509400 | -6.68687400 | -13.02845000 |
| H | 27.80339600 | -6.82050500 | -12.71699600 |
| H | 28.14201700 | -8.00761500 | -11.44073100 |
| N | 28.89354700 | -8.38296000 | -16.23238800 |
| C | 28.69016100 | -7.77024200 | -17.53347500 |
| C | 27.23525000 | -7.96867400 | -17.96392300 |
| O | 26.77933500 | -9.09929700 | -18.08995500 |
| H | 28.92030100 | -9.39125700 | -16.19593900 |
| H | 29.00698900 | -6.72935300 | -17.47344700 |
| N | 26.51615000 | -6.82730000 | -18.11559300 |
| C | 25.05618500 | -6.83989200 | -18.14800600 |
| C | 24.50752700 | -5.69586500 | -17.29449500 |
| H | 26.95441300 | -5.95973000 | -17.83892100 |
| H | 24.73919700 | -7.81389200 | -17.76542300 |
| H | 23.41579400 | -5.71903000 | -17.28716600 |
| H | 24.86783300 | -5.75249600 | -16.26285000 |
| H | 24.81020800 | -4.72234600 | -17.69821700 |
| C | 23.25605400 | 6.03699200  | -15.04215700 |
| C | 23.15129300 | 4.50087100  | -15.03361500 |
| C | 22.23204600 | 3.93955300  | -13.97412900 |
| C | 22.38939600 | 4.27851900  | -12.62525900 |
| C | 21.26370000 | 2.97648000  | -14.29122000 |
| C | 21.63407500 | 3.66303900  | -11.63122300 |
| C | 20.50971800 | 2.33560500  | -13.31124900 |
| C | 20.70274400 | 2.67696900  | -11.97013100 |
| O | 19.96493000 | 2.01944500  | -11.02559700 |
| H | 23.64784900 | 6.42083900  | -14.09429500 |
| H | 22.79212500 | 4.17788000  | -16.01722800 |
| H | 24.14704300 | 4.05285100  | -14.92801200 |
| H | 23.13680900 | 5.01176200  | -12.33490700 |
| H | 21.13491500 | 2.68166700  | -15.32897100 |
| H | 21.78312300 | 3.92624300  | -10.58902100 |
| H | 19.82717200 | 1.53149800  | -13.55916000 |
| H | 20.33253600 | 2.22078900  | -10.15387300 |
| C | 20.86193400 | -5.83974700 | -16.08300600 |
| C | 19.77371100 | -5.54626800 | -15.05229800 |
| O | 18.77644900 | -6.24804200 | -14.92152900 |
| H | 21.84416100 | -5.85736100 | -15.60078500 |
| N | 20.00031600 | -4.43215000 | -14.28251600 |
| C | 19.19491000 | -4.19819200 | -13.09497200 |
| C | 18.13915600 | -3.10990300 | -13.26382800 |
| O | 18.36810500 | -2.05122400 | -13.87133400 |
| C | 20.14903100 | -3.84554700 | -11.92778900 |
| O | 19.47646800 | -3.60974100 | -10.69632300 |

|   |             |             |              |
|---|-------------|-------------|--------------|
| H | 20.91924000 | -3.99339200 | -14.32332000 |
| H | 18.69377100 | -5.14223200 | -12.87548500 |
| H | 20.80956600 | -4.70440200 | -11.77661800 |
| H | 20.77966300 | -2.99706500 | -12.20673400 |
| H | 19.18451700 | -2.68941300 | -10.69119800 |
| C | 23.90650100 | -7.35674100 | -7.56585700  |
| C | 22.89249500 | -6.30873500 | -7.13883700  |
| O | 21.72716000 | -6.61956200 | -6.88724000  |
| C | 23.72655900 | -7.70023000 | -9.06977400  |
| C | 24.14836000 | -6.63359800 | -10.01951900 |
| C | 25.33835900 | -6.42525600 | -10.66755600 |
| N | 23.34946300 | -5.56430500 | -10.39712500 |
| C | 24.05584700 | -4.76726200 | -11.23795500 |
| N | 25.27118000 | -5.26866100 | -11.42150400 |
| H | 24.93924100 | -7.05594600 | -7.37539500  |
| H | 24.31446800 | -8.59554500 | -9.29290400  |
| H | 22.67460900 | -7.96255300 | -9.23026800  |
| H | 22.41691300 | -5.37768500 | -10.05488200 |
| H | 26.23298200 | -7.02486800 | -10.62381200 |
| H | 23.66163800 | -3.88465100 | -11.71582800 |
| N | 23.30573300 | -5.01076900 | -7.14047000  |
| C | 22.40691500 | -3.96387200 | -6.62809500  |
| C | 23.33556800 | -2.76800300 | -6.39106700  |
| C | 24.48384000 | -2.98783400 | -7.38681700  |
| C | 24.67918000 | -4.50683500 | -7.35140300  |
| H | 21.92437800 | -4.32013500 | -5.71278800  |
| H | 22.82461000 | -1.81901500 | -6.53973900  |
| H | 23.72507500 | -2.79119300 | -5.36757500  |
| H | 24.18859100 | -2.66332200 | -8.39053300  |
| H | 25.39752100 | -2.45452000 | -7.11430100  |
| H | 25.10774900 | -4.89623200 | -8.27646500  |
| H | 25.33812800 | -4.78839000 | -6.51913100  |
| C | 23.17498000 | 4.07098600  | -8.16499200  |
| C | 24.47284700 | 3.92121100  | -7.39357400  |
| O | 24.50045400 | 3.75591500  | -6.17394200  |
| H | 22.77940500 | 3.07227300  | -8.36836700  |
| H | 23.31807200 | 4.57693600  | -9.12195100  |
| N | 25.61388100 | 3.94376600  | -8.14063200  |
| C | 26.90904500 | 3.66685800  | -7.52192200  |
| C | 27.90528800 | 3.87907300  | -8.66416900  |
| C | 27.11911100 | 3.44698300  | -9.89651700  |
| C | 25.70596300 | 3.97090500  | -9.61382900  |
| H | 26.93791900 | 2.64064500  | -7.13344500  |
| H | 28.15298300 | 4.94271600  | -8.74548600  |
| H | 28.83454200 | 3.32597200  | -8.52358700  |
| H | 27.52858200 | 3.84742100  | -10.82084500 |
| H | 27.09905700 | 2.35682300  | -9.96860800  |
| H | 25.59171000 | 4.99607000  | -9.98946300  |
| H | 24.94064300 | 3.34431000  | -10.07489400 |
| C | 23.37404300 | 0.46301600  | -4.62954400  |
| C | 24.33143700 | 0.45229300  | -5.82781100  |
| C | 23.71837800 | 0.59926000  | -7.20583600  |
| C | 22.34481500 | 0.52397600  | -7.46297800  |
| C | 24.57908400 | 0.75004200  | -8.30383200  |
| C | 21.85234500 | 0.54572600  | -8.77333800  |
| C | 24.09410300 | 0.80518600  | -9.60547100  |
| C | 22.72308900 | 0.68389300  | -9.85321000  |
| H | 22.41518900 | -0.01239800 | -4.85472800  |
| H | 25.06344000 | 1.25597100  | -5.69794500  |
| H | 24.90366800 | -0.48396800 | -5.82985100  |
| H | 21.64377400 | 0.42920200  | -6.64146000  |
| H | 25.64984200 | 0.81925600  | -8.12892400  |
| H | 20.78539600 | 0.42844400  | -8.94666800  |
| H | 24.78099800 | 0.92560700  | -10.42970600 |
| H | 22.35196800 | 0.69194400  | -10.87094000 |
| C | 32.20579200 | -3.28028800 | -6.21781100  |
| C | 30.91016100 | -2.46535700 | -6.01822000  |
| C | 30.03941500 | -2.43056500 | -7.25026100  |
| C | 30.42954100 | -2.40600800 | -8.57050900  |
| N | 28.64630200 | -2.48850900 | -7.20379000  |
| C | 28.23008300 | -2.53356200 | -8.47225700  |
| N | 29.27989800 | -2.47569300 | -9.32049200  |
| H | 32.83468800 | -2.83463400 | -6.99267300  |
| H | 30.32124200 | -2.87933600 | -5.19700600  |
| H | 31.16695400 | -1.44231900 | -5.69973000  |
| H | 27.93126900 | -3.20145400 | -5.86077200  |
| H | 31.41319600 | -2.39216500 | -9.00149600  |
| H | 27.21001500 | -2.59714200 | -8.82021100  |
| H | 29.22522600 | -2.47436100 | -10.34198200 |
| C | 33.47987500 | -4.18205600 | -10.78262200 |
| C | 33.55551600 | -2.73159200 | -10.32882300 |
| O | 33.65463100 | -2.38972700 | -9.15218500  |
| C | 32.08797700 | -4.81591700 | -10.65557500 |
| O | 31.78601000 | -5.03205100 | -9.30454300  |
| H | 33.84031900 | -4.28179600 | -11.81246500 |
| H | 31.33025600 | -4.17431300 | -11.13153900 |
| H | 32.09968800 | -5.75946000 | -11.22785500 |
| H | 30.87483100 | -5.39791400 | -9.30061600  |
| N | 33.52291400 | -1.80283500 | -11.32933200 |
| C | 33.30483600 | -0.40189600 | -11.03294100 |
| H | 33.24146100 | -2.11727500 | -12.24649400 |
| H | 33.55832500 | 0.18625700  | -11.91941900 |
| H | 32.25468600 | -0.20144900 | -10.79449000 |
| C | 30.70439100 | -3.79264100 | -14.83721100 |
| C | 30.70570400 | -2.82695100 | -13.65162900 |
| C | 29.35654100 | -2.38434900 | -13.09687300 |
| O | 28.28585400 | -2.70925000 | -13.69744100 |
| O | 29.40584200 | -1.69904000 | -12.03636400 |
| H | 30.03036300 | -4.63073800 | -14.67933500 |

|   |             |             |              |    |             |             |              |
|---|-------------|-------------|--------------|----|-------------|-------------|--------------|
| H | 31.23321900 | -3.26917600 | -12.80235700 | H  | 30.64240800 | 2.07593300  | -12.35934100 |
| H | 31.25703400 | -1.90830100 | -13.89390700 | H  | 29.38404400 | 1.09990500  | -12.03559100 |
| C | 27.87487400 | 1.06305800  | -17.13699500 | C  | 16.94627600 | -3.33780700 | -12.67539200 |
| C | 29.25331600 | 1.60551000  | -16.82242400 | C  | 16.59812700 | -4.44991200 | -11.75907900 |
| O | 29.42504500 | 2.73987100  | -16.37788800 | C  | 15.33346600 | -3.92837000 | -11.06049000 |
| C | 27.09447100 | 0.79298200  | -15.83100800 | C  | 14.67574800 | -3.03716200 | -12.12488100 |
| C | 25.64171500 | 0.49111400  | -16.09551500 | C  | 15.87241200 | -2.33801700 | -12.77742700 |
| C | 24.79970400 | 1.49501500  | -16.58525000 | H  | 17.41389600 | -4.63058400 | -11.05975400 |
| C | 25.09752000 | -0.77477100 | -15.85583400 | H  | 14.69011600 | -4.74061500 | -10.71403100 |
| C | 23.44970300 | 1.25229800  | -16.82294800 | H  | 15.61364900 | -3.32606600 | -10.18889300 |
| C | 23.74884900 | -1.03694800 | -16.09046000 | H  | 14.15555600 | -3.65627500 | -12.86406600 |
| C | 22.92863600 | -0.01515800 | -16.56505900 | H  | 13.95437200 | -2.32853800 | -11.71081400 |
| O | 21.58593400 | -0.30005000 | -16.73593300 | H  | 15.71451100 | -2.06436800 | -13.82307300 |
| H | 27.35486700 | 1.83090400  | -17.71687700 | H  | 16.15894700 | -1.42485600 | -12.24019400 |
| H | 27.55579300 | -0.03953600 | -15.28826400 | C  | 29.55103300 | -2.94412200 | -1.16182700  |
| H | 27.18123800 | 1.67495800  | -15.18995500 | C  | 28.26543000 | -3.74471600 | -1.39629500  |
| H | 25.19733800 | 2.49029000  | -16.76568600 | C  | 28.11381200 | -4.30123400 | -2.81628700  |
| H | 25.71583400 | -1.55503900 | -15.42237900 | C  | 27.99812200 | -3.26643900 | -3.92780000  |
| H | 22.80463800 | 2.04610600  | -17.19161800 | O  | 28.17337800 | -2.06621300 | -3.78787000  |
| H | 23.31969300 | -2.00508100 | -15.85873200 | O  | 27.72445700 | -3.84349500 | -5.09977500  |
| H | 21.13948000 | 0.48259100  | -17.08461400 | H  | 29.55706700 | -2.10583100 | -1.86462200  |
| N | 30.27478000 | 0.73381400  | -17.03203600 | H  | 28.20657700 | -4.58535400 | -0.69383400  |
| C | 31.68295600 | 1.10885800  | -16.98009100 | H  | 27.40725700 | -3.09762300 | -1.17861000  |
| C | 32.41634000 | 0.43392200  | -15.82198400 | H  | 28.97290500 | -4.93440300 | -3.07729900  |
| C | 31.91915800 | 0.96498000  | -14.47843600 | H  | 27.24009200 | -4.95936600 | -2.88831100  |
| C | 32.42865400 | 2.34261800  | -14.09437500 | H  | 30.46536600 | -3.51013100 | -1.36804800  |
| O | 33.45303100 | 2.76718000  | -14.80127200 | H  | 29.56603400 | -2.49716200 | -0.16243300  |
| O | 31.94551800 | 2.98283200  | -13.15604300 | C  | 34.86196500 | 8.00001300  | -10.31595800 |
| H | 30.04827200 | -0.16779100 | -17.42371000 | C  | 35.24799100 | 6.50784000  | -10.33413800 |
| H | 31.72579900 | 2.19562400  | -16.88934200 | C  | 35.15418600 | 5.90390700  | -11.69805900 |
| H | 32.24475800 | -0.64864500 | -15.86838400 | C  | 34.25830900 | 5.03179300  | -12.26651700 |
| H | 33.49231200 | 0.59978000  | -15.92083500 | N  | 36.03246200 | 6.22210700  | -12.72457300 |
| H | 30.82719600 | 0.99362600  | -14.45259800 | C  | 35.65052400 | 5.54367900  | -13.84122200 |
| H | 32.19927500 | 0.30140200  | -13.65409600 | N  | 34.57972600 | 4.81658900  | -13.59268900 |
| C | 25.80208800 | -1.82131800 | -12.17026100 | H  | 35.56311100 | 8.60115900  | -10.90469100 |
| O | 25.24044400 | -2.64356700 | -12.97163500 | H  | 36.25685300 | 6.36833600  | -9.92405200  |
| O | 26.58316800 | -2.22226000 | -11.25403600 | H  | 34.57174500 | 5.95078400  | -9.67778000  |
| C | 25.60126700 | -0.37563500 | -12.39512900 | H  | 36.81866900 | 6.85033400  | -12.65393900 |
| C | 26.63438500 | 0.55740700  | -12.19219800 | H  | 33.40382100 | 4.53901000  | -11.82808000 |
| O | 27.85638100 | 0.25823600  | -11.66382500 | H  | 36.17421600 | 5.60645800  | -14.78358900 |
| C | 26.41683500 | 1.89422400  | -12.53971400 | H  | 33.83186200 | 3.63312900  | -14.39804800 |
| C | 25.16549700 | 2.31598700  | -12.96944200 | H  | 34.87102300 | 8.38159200  | -9.28968100  |
| C | 24.12080800 | 1.40234800  | -13.12638300 | H  | 33.87106300 | 8.09550400  | -10.77201300 |
| C | 24.36241600 | 0.06257300  | -12.87870700 | Mn | 26.90704100 | -4.11742600 | -12.37174000 |
| H | 28.18578400 | -0.69372700 | -11.79007600 |    |             |             |              |
| H | 27.23972100 | 2.59157300  | -12.47017200 |    |             |             |              |
| H | 25.01926500 | 3.36583800  | -13.18657800 |    |             |             |              |
| H | 23.14732500 | 1.71675700  | -13.46432200 |    |             |             |              |
| H | 23.57874300 | -0.66770400 | -13.02951800 |    |             |             |              |
| O | 26.92908500 | -4.78139800 | -14.53216500 |    |             |             |              |
| H | 27.46047100 | -3.97448900 | -14.70390400 |    |             |             |              |
| H | 27.56449100 | -5.50139900 | -14.72607600 |    |             |             |              |
| O | 22.58960900 | -3.08295400 | -13.81910800 |    |             |             |              |
| H | 22.10886900 | -2.22377300 | -13.86318200 |    |             |             |              |
| H | 23.53681600 | -2.88464600 | -13.68566200 |    |             |             |              |
| O | 20.89647200 | -0.95800800 | -14.03299300 |    |             |             |              |
| H | 21.01282400 | -0.71202200 | -14.96637200 |    |             |             |              |
| H | 20.00387500 | -1.37075900 | -13.99512800 |    |             |             |              |
| C | 34.22900400 | 4.62598400  | -6.61600900  |    |             |             |              |
| C | 33.55228200 | 3.34860300  | -6.08101700  |    |             |             |              |
| C | 32.22257000 | 2.99382200  | -6.77680700  |    |             |             |              |
| C | 31.88955800 | 1.49154400  | -6.64231800  |    |             |             |              |
| N | 30.52347000 | 1.11026400  | -7.02426600  |    |             |             |              |
| C | 30.08840600 | 1.03621700  | -8.29972100  |    |             |             |              |
| N | 30.80674300 | 1.55293500  | -9.28524100  |    |             |             |              |
| N | 28.87114300 | 0.51541600  | -8.55262000  |    |             |             |              |
| H | 34.58482400 | 4.44674800  | -7.63917600  |    |             |             |              |
| H | 34.25526700 | 2.51329500  | -6.19928200  |    |             |             |              |
| H | 33.37355700 | 3.44019800  | -5.00301900  |    |             |             |              |
| H | 31.39945500 | 3.58349800  | -6.35853100  |    |             |             |              |
| H | 32.29016900 | 3.28463400  | -7.83273700  |    |             |             |              |
| H | 32.60938800 | 0.88915700  | -7.21272400  |    |             |             |              |
| H | 31.99989800 | 1.19531400  | -5.59659700  |    |             |             |              |
| H | 29.96944400 | 0.61994100  | -6.33605900  |    |             |             |              |
| H | 31.68573300 | 1.98780100  | -9.06505800  |    |             |             |              |
| H | 30.54282700 | 1.46395200  | -10.31183000 |    |             |             |              |
| H | 28.53250400 | -0.22010900 | -7.93803000  |    |             |             |              |
| H | 28.59168600 | 0.40650600  | -9.52543300  |    |             |             |              |
| C | 31.09199900 | 7.81098500  | -10.77001100 |    |             |             |              |
| C | 30.05742800 | 7.02778700  | -9.94236100  |    |             |             |              |
| C | 28.78224100 | 6.82401700  | -10.70773100 |    |             |             |              |
| C | 27.56740000 | 7.42600400  | -10.49461100 |    |             |             |              |
| C | 28.63167400 | 6.00415300  | -11.88961900 |    |             |             |              |
| C | 27.29480800 | 6.16610300  | -12.34942700 |    |             |             |              |
| C | 29.49270900 | 5.14330600  | -12.59446500 |    |             |             |              |
| N | 26.66605800 | 7.03091600  | -11.47291300 |    |             |             |              |
| C | 26.81638900 | 5.52025200  | -13.49466800 |    |             |             |              |
| C | 29.02186300 | 4.49793700  | -13.73158600 |    |             |             |              |
| C | 27.69957500 | 4.69299700  | -14.18120000 |    |             |             |              |
| H | 31.16721900 | 7.35807000  | -11.76535400 |    |             |             |              |
| H | 30.48009400 | 6.04979100  | -9.67361200  |    |             |             |              |
| H | 29.85182200 | 7.54422600  | -8.99776000  |    |             |             |              |
| H | 27.26682600 | 8.11416000  | -9.71730900  |    |             |             |              |
| H | 25.71617200 | 7.35316900  | -11.55161600 |    |             |             |              |
| H | 30.51622900 | 4.98217900  | -12.27176900 |    |             |             |              |
| H | 25.79953100 | 5.67053600  | -13.84248600 |    |             |             |              |
| H | 29.67263300 | 3.84898900  | -14.30409000 |    |             |             |              |
| H | 27.38408900 | 4.18423600  | -15.08577600 |    |             |             |              |
| O | 30.31188300 | 1.32408800  | -11.82601500 |    |             |             |              |
